# Supplementary material for: Direct access to functional phenazines via oxidative annulation of anilines and o-phenylenediamines with a reusable cobalt catalyst
Source: Royal Society of Chemistry journal article supplement (doi:10.1039/d2gc03878a), 2022-12-14
Supplement: d2gc03878a1.pdf [file d2gc03878a1.pdf]

## Supporting Information

### Direct Access to Functional Phenazines via Oxidative Annulation of Anilines and *o*-Phenylenediamines with a Reusable Cobalt Catalyst

Qingqing Liu,<sup>a</sup> Chenggang Ci,<sup>b</sup> He Zhao,<sup>a</sup> Rong Xie,<sup>a</sup> HuanFeng Jiang<sup>a</sup> and Min Zhang<sup>\*a</sup>

<sup>a</sup> Key Lab of Functional Molecular Engineering of Guangdong Province, School of Chemistry and Chemical Engineering, South China University of Technology, Guangzhou 510641, People's Republic of China

<sup>b</sup> Key Laboratory of Computational Catalytic Chemistry of Guizhou Province, Department of Chemistry and Chemical Engineering, Qiannan Normal University for Nationalities, Duyun 558000, P. R. China.

#### Table of Contents

|                                                               |         |
|---------------------------------------------------------------|---------|
| 1. General information                                        | 2       |
| 2. Procedure for the preparation of Co-N <sub>x</sub> /NC-800 | 2       |
| 3. XRD measurements and data of Co-N <sub>x</sub> /NC-800     | 3       |
| 4. Experimental Section                                       | 3       |
| 4.1 Typical procedure for the synthesis of product <b>C1</b>  | 4       |
| 4.2 Poisoning experiment                                      | 4       |
| 4.3 Acid Leaching Experiment                                  | 4       |
| 4.4 Details of catalyst and HFIP-recycling experiments        | 5       |
| 4.5 Control experiments                                       | 5       |
| 5. Synthetic utility                                          | 6-7     |
| 6. Single Crystal X-ray Diffraction of <b>C44</b>             | 7-8     |
| 7. Analytical data of the obtained compounds                  | 8-19    |
| 8. NMR spectra of the obtained compounds                      | 20-79   |
| 9. HR-MS spectra of the obtained compounds                    | 80-139  |
| 10. DFT calculation                                           | 140-141 |

## 1. General information

All the obtained products were characterized by melting points (m.p.),  $^1\text{H-NMR}$ ,  $^{13}\text{C-NMR}$ , and mass spectra (MS). The NMR spectra of the known compounds were found to be identical with the ones reported in the literatures. Additionally, all the new compounds were further characterized by high resolution mass spectra (HRMS). Melting points were measured on an Electrothermal SGW-X4 microscopy digital melting point apparatus and are uncorrected. Mass spectra were recorded on Trace ISQ GC/MS, High-resolution mass spectra (HRMS) were recorded on a thermo scientific Q Exactive Ultimate 3000 UPLC spectrometer.  $^1\text{H-NMR}$  and  $^{13}\text{C-NMR}$  spectra were obtained on Bruker-400 or Bruker-500 and referenced to 7.26 ppm for chloroform solvent or 2.54 ppm for dimethyl sulfoxide solvent with TMS as internal standard (0 ppm). Chemical shifts were reported in parts per million (ppm,  $\delta$ ) downfield from tetramethylsilane. Proton coupling patterns are described as singlet (s), doublet (d), triplet (t), multiplet (m). Column chromatography was performed on silica gel (200-300 mesh). Reactions were monitored by using thin layer chromatography (TLC) (Qingdao Jiyida silica gel reagent factory GF254). All the reagents were purchased from Bide Pharmatech Ltd. and Energy Chemical. All solvents were purchased from Greagent (Shanghai Titansci incorporated company) and used without further purification. All reactions were heated by metal sand bath (WATTCAS, LAB-500, <https://www.wattcas.com>).

XRD was conducted on a TD-3500 powder diffractometer (Tongda, China) operated at 30 kV and 20 mA, using Cu  $K\alpha$  radiation sources in a Bragg angle range of 10–80°. EPR spectra were recorded on a Bruker X-band A-200 spectrometer. The EPR parameters were set as the following: sweep width 200 G, center field 3511.70 G, sweep time 39.997 s, microwave power 0.20 mW, modulation amplitude 1.000 G, modulation frequency 100 kHz, resolution 1024. The related systems were reacted under the standard conditions for 30 min. Then, the reaction solution was taken out by capillary and analyzed by EPR at room temperature. The samples were taken out by a capillary (borosilicate glass, 0.8-1.1×100 mm), and then recorded by EPR spectrometer at room temperature and parameters.

## 2. Procedure for the preparation of Co-N<sub>x</sub>/NC-800<sup>1</sup>

Cobalt(II) acetate tetrahydrate (126.8 mg, 0.5 mmol) and 1,10-phenanthroline (275.3 mg, 1.5 mmol) (Co:phenanthroline = 1:3 molar ratio) were stirred in ethanol (20 mL) for approximately 20 minutes at room temperature. Then, carbon powder (696 mg) (VULCAN® XC72R, Cabot Corporation Prod. Code XVC72R; CAS No. 1333-86-4) was added and the whole reaction mixture was refluxed for 4 hours. The reaction mixture was cooled to room temperature and the ethanol was removed in vacuo. The solid sample obtained was dried at 60 °C for 12 hours, after which it was grinded to a fine powder. Then, the grinded powder was transferred into a ceramic crucible and placed in the oven. The oven was heated to 800 °C at the rate of 25 °C per minute, and held at 800 °C for 2 hours under argon atmosphere. After heating the oven was switched off and cooled to room temperature. During the whole process argon was constantly passed through the oven.

### 3. XRD measurements and data of Co-N<sub>x</sub>/NC-800

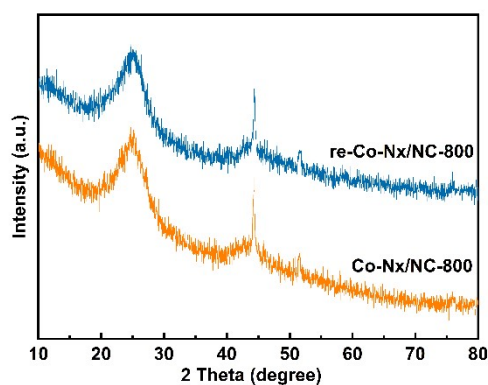

Figure S1. XRD measurements and data of Co-N<sub>x</sub>/NC-800

### 4. Experimental Section

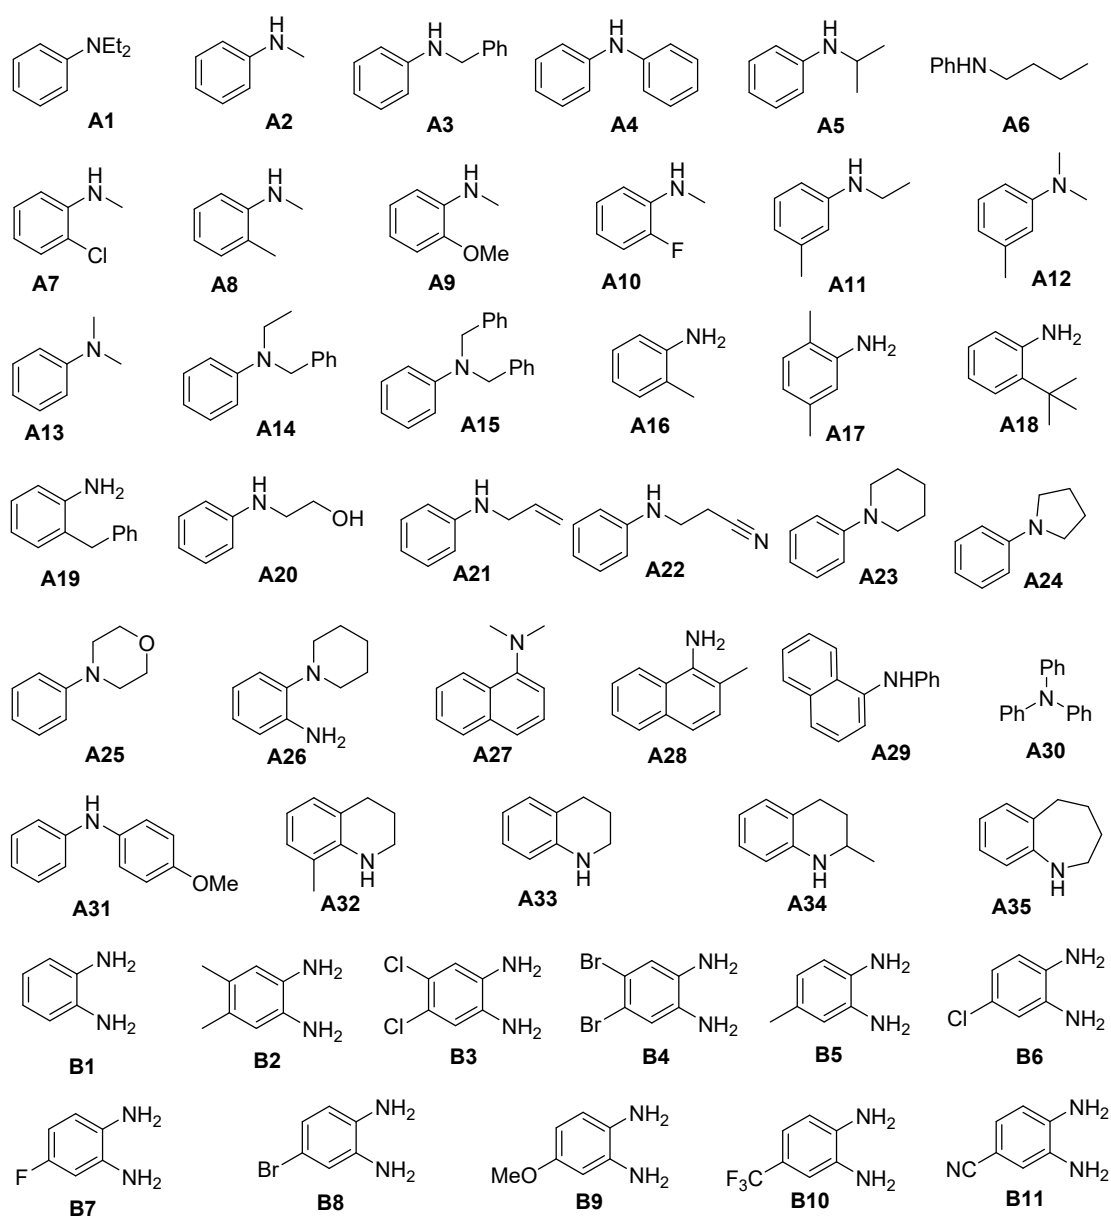

Scheme S1. Substrates employed for the reaction

#### 4.1 Typical procedure for the synthesis of product C1

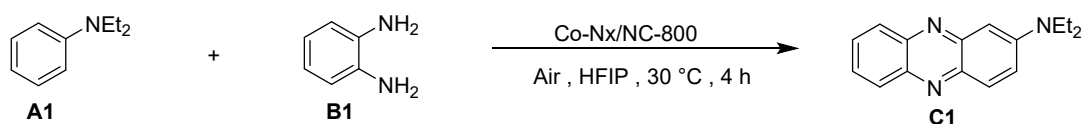

Under air atmosphere, the mixture of Co-Nx/NC-800 (30 mg), *N,N*-diethylaniline **A1** (22.4mg, 0.15 mmol), *o*-phenylenediamine **B1** (16.2mg, 0.15 mmol) and HFIP (1.5 mL) was introduced in a Schlenk tube (50 mL), which was then stirred at 30 °C for 4 h. Next, the mixture was extracted with EtOAc (15 mL x 3), and concentrated under vacuum. The residue was purified by column chromatography on silica gel to give the desired product **C1** (ethyl acetate : petroleum ether = 1 : 5, v/v).

#### 4.2 Poisoning experiment

Under air atmosphere, a mixture of Co-Nx/NC-800 (30 mg), arylamines **A1** (0.15 mmol), *o*-Phenylenediamine derivatives **B1** (0.15 mmol), HFIP (1.5 mL) and KSCN (25 mol%) were introduced in a Schlenk tube (50 mL), and then was stirred at 30 °C for 4 h. Next, the mixture was extracted with EtOAc for three times, and concentrated in vacuo. The residue was purified by column chromatography on silica gel to give the product **C1** (EtOAc : petroleum ether = 1:5, v/v).

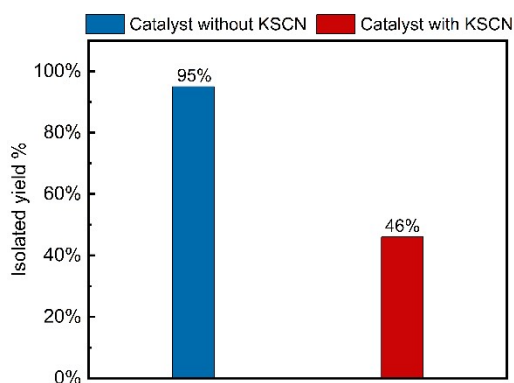

Scheme S2. KSCN poisoning experiment

#### 4.3 Acid Leaching Experiment

150 mg of the catalyst prepared by the standard procedure were treated with 50 mL of 0.5M H<sub>2</sub>SO<sub>4</sub> solution at 90 °C for 4 h. Then, the slurry was filtrated with suction filtration on a paper filter with deionized water, dissolved in EtOH and dried under rotary evaporator and vacuum. The activity was estimated via model reaction under the standard condition.

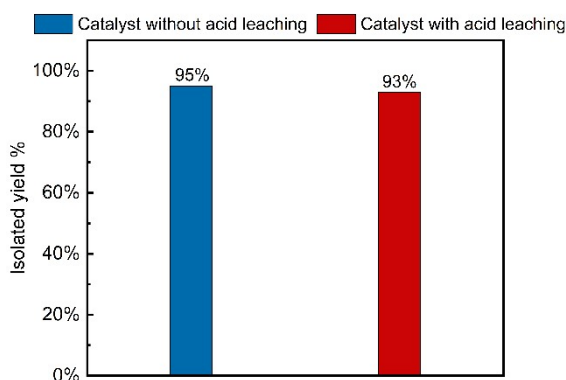

Scheme S3. Acid Leaching Experiment.

## 4.4 Catalyst and solvent-recycling experiment

Under air atmosphere, a mixture of Co-Nx/NC-800 (30 mg), arylamines **A1** (0.15 mmol), *o*-Phenylenediamine derivatives **B1** (0.15 mmol) and HFIP (1.5 mL) were introduced in a Schlenk tube (50 mL), and then was stirred at 30 °C for 4 h. Next, the mixture was extracted with EtOAc for three times, and concentrated in vacuo. The residue was purified by column chromatography on silica gel to give the product **C1** (ethylacetate : petroleum ether = 1:5, v/v). The catalyst was separated by centrifugation, washed with EtOAc and ethanol for three times, then dried under vacuum at 60 °C for 4 h. After that, the separated catalyst was reused for the next cycle experiment. As for solvent-recycling, HFIP solvent was directly recovered through a rotary evaporator with somewhat loss, which was then reused for the next run of the model reaction and did not affect the product yield.

## 4.5 Control experiments

### (1) Preparation of compound C13-1<sup>2</sup>

The mixture of 1-bromo-2-nitrobenzene (404 mg, 2 mmol), *N,N*-dimethyl-1,4-phenylenediamine (2 mmol) and DBU (2 mmol) in DMF (1.5 mL) was stirred at 140 °C for 10 hours. After cooling to room temperature, the reaction mixture was extracted with EtOAc for three times and the organic layer was dried over anhydrous sodium sulfate and then concentrated by removing the solvent under vacuum. Finally, the residue was purified via silica gel column chromatography with ethylacetate : petroleum ether (1:40, v/v) as an eluent to afford *N,N*-dimethyl-*N*<sup>4</sup>-(2-nitrophenyl)benzene-1,4-diamine.

Next, under N<sub>2</sub> atmosphere, Pd/C (50 mg), EtOH (2 mL) and *N,N*-dimethyl-*N*<sup>4</sup>-(2-nitrophenyl)benzene-1,4-diamine were added successively to a Schlenk tube (50 mL) and then equipped with an H<sub>2</sub> balloon at 30 °C for 10 h. The resulting mixture was extracting with EtOAc, dried with anhydrous sodium sulfate, and then concentrated by removing the solvent under vacuum. The residue was purified by column chromatography on silica gel, and eluting with ethylacetate : petroleum ether (1:5, v/v) to give the target product **C13-1**. <sup>1</sup>H NMR (500 MHz, DMSO-*d*<sub>6</sub>) δ 6.84 (d, J = 7.8 Hz, 1H), 6.77 (d, J = 8.8 Hz, 2H), 6.67 (t, J = 6.0 Hz, 4H), 6.52 (s, 1H), 6.47 (dt, J = 8.4, 4.8 Hz, 1H), 4.64 (s, 2H), 2.78 (s, 6H); <sup>13</sup>C NMR (126 MHz, DMSO-*d*<sub>6</sub>) δ 145.42, 140.14, 136.07, 131.32, 121.90, 119.13, 118.90, 117.15, 115.42, 114.81, 41.69.

### (2) Detection of aniline radical species

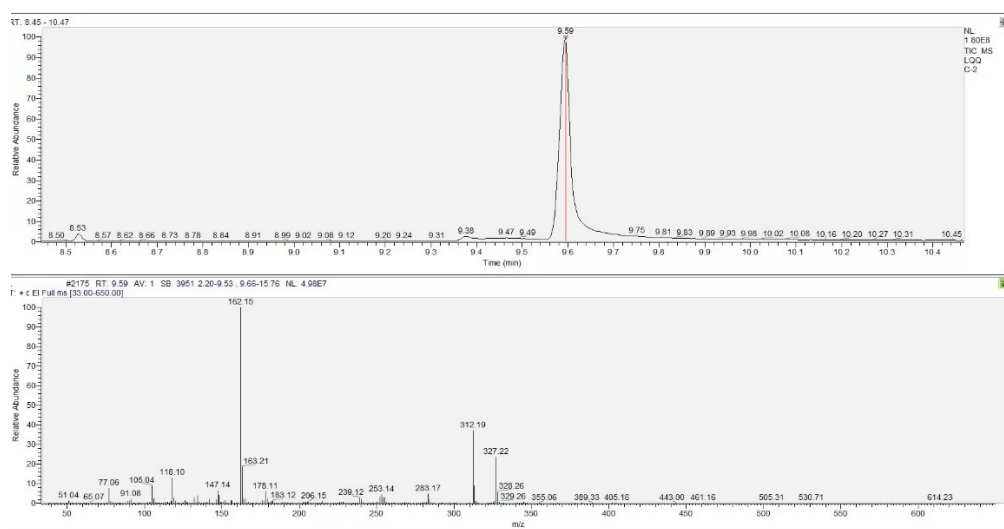

Figure S2. GC-MS analysis for the coupling adduct of 1,1-diphenylethylene-trapping the aniline radical

## 5. Synthetic utility

**Gram-scale synthesis of compound C1:** Under air atmosphere, Co-Nx/NC-800 (983 mg), *N,N*-diethylaniline **A1** (5 mmol), *o*-Phenylenediamine **B1** (5 mmol) and HFIP (33 mL) were introduced in a reaction bulb (100 mL), and then was stirred at 30 °C for 4 h. Next, the mixture was extracted with EtOAc for three times, and concentrated in vacuo. The residue was purified by column chromatography on silica gel to give the desired product **C1** (ethylacetate : petroleum ether = 1:5, v/v).

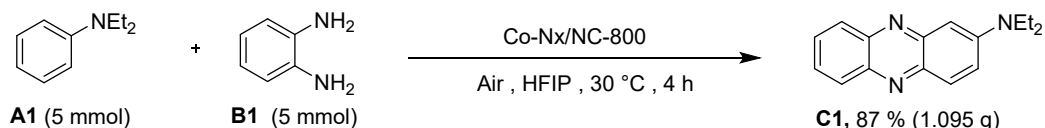

**Debenzylation of C15 to compound C52:** under N<sub>2</sub> atmosphere, Pd/C (10 mol%), **C15** (0.1 mmol, 64.8 g), HCOONH<sub>4</sub> (1 mmol, 63 mg), MeOH (0.5 mL) were introduced in a Schlenk tube (50 mL), successively. Then it was stirred at 75 °C for 12 h. After cooling down to room temperature, the resulting mixture was extracting with ethyl acetate, dried with anhydrous sodium sulfate, and then concentrated by removing the solvent under vacuum. Finally, the residue was purified by column chromatography on silica gel to give **C51** (71% yield). <sup>1</sup>H NMR (500 MHz, DMSO-*d*<sub>6</sub>) δ 8.05 (d, J = 8.6 Hz, 1H), 7.98 (d, J = 8.6 Hz, 1H), 7.90 (d, J = 9.4 Hz, 1H), 7.76 (t, J = 7.6 Hz, 1H), 7.65 (t, J = 7.6 Hz, 1H), 7.45 (dd, J = 9.4, 2.2 Hz, 1H), 6.92 (s, 1H), 6.48 (s, 2H); <sup>13</sup>C NMR (126 MHz, DMSO-*d*<sub>6</sub>) δ 151.49, 146.27, 143.68, 140.22, 139.77, 130.61, 130.50, 129.70, 128.49, 127.57, 127.19, 101.67; HRMS (ESI): Calcd. for C<sub>12</sub>H<sub>10</sub>N<sub>3</sub> [M+H]<sup>+</sup>: 196.08692; found: 196.08678.

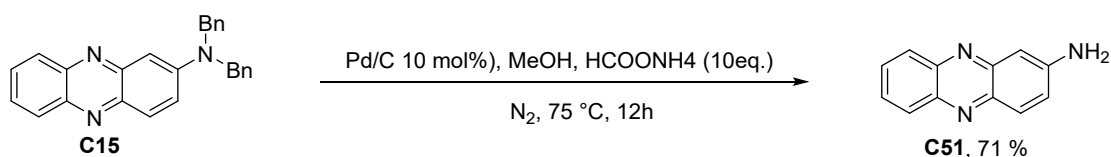

**Derivation of amine C51 to amide C52:** 1-aminophenazine **C51** (0.1 mmol, 19.5 mg.) was dissolved in the solution of dry CH<sub>2</sub>Cl<sub>2</sub> (2 mL) and anhydrous pyridine (0.1 mL). 2-chlorobenzoyl chloride (1.4 mmol, 245 mg) diluted in CH<sub>2</sub>Cl<sub>2</sub> (3 mL), then added dropwise to the above solution. The mixture was stirred at 30 °C for 0.5 h, as monitored by TLC until reaction completed, and then the solvent was removed by distillation. The residue was purified by flash chromatography on silica gel using petroleum ether/ethyl acetate (1/1, v/v), and then recrystallized with anhydrous ethanol to give the **C52**. <sup>1</sup>H NMR (500 MHz, DMSO-*d*<sub>6</sub>) δ 11.17 (s, 1H), 8.83 (s, 1H), 8.23 (t, J = 10.0 Hz, 3H), 8.10 (d, J = 10.0 Hz, 1H), 7.95 - 7.89 (m, 2H), 7.72 (d, J = 10.0 Hz, 1H), 7.63 (d, J = 5.0 Hz, 1H), 7.57 (t, J = 10.0 Hz, 1H), 7.52 (t, J = 10.0 Hz, 1H); <sup>13</sup>C NMR (126 MHz, DMSO-*d*<sub>6</sub>) δ 166.32, 144.21, 143.72, 142.50, 141.10, 140.92, 136.91, 132.02, 131.47, 130.60, 130.53, 130.48, 130.28, 129.81, 129.60, 129.49, 127.88, 126.82, 115.06; HRMS (ESI): Calcd. for C<sub>19</sub>H<sub>13</sub>ClN<sub>3</sub>O [M+H]<sup>+</sup>: 334.07417; found: 334.07336.

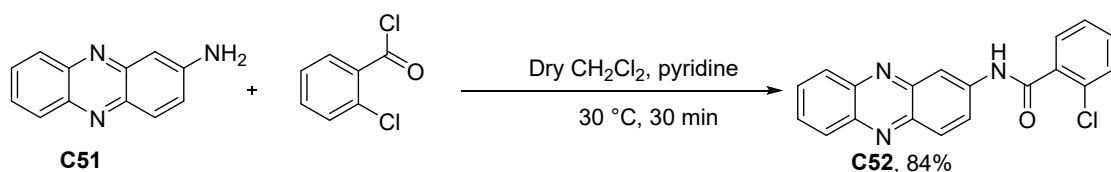

Synthesis of **C53** via Suzuki cross-coupling of **C40** with pyridin-3-ylboronic acid: under nitrogen atmosphere, **C40** (0.1 mmol, 41 mg), boronic acid (0.4 mmol, 49 mg), Pd(OAc)<sub>2</sub> (5 mol %), PPh<sub>3</sub> (10 mol %), K<sub>2</sub>CO<sub>3</sub> (2 equiv) and 1,4-dioxane/H<sub>2</sub>O (4/1) were introduced in a Schlenk tube (50mL), successively. The mixture was stirred at 120 °C for 24 hours and cooled to room temperature. The resulting mixture concentrated under vacuum. The residue was purified by column chromatography on silica gel to give the desired product **C53** as a red solid. <sup>1</sup>H NMR (500 MHz, DMSO-*d*<sub>6</sub>) δ 8.50 (dd, J = 8.8, 4.6 Hz, 2H), 8.45 (d, J = 5.0 Hz, 2H), 8.11 (s, 1H), 8.01 (s, 1H), 7.99 (d, J = 5.0 Hz, 1H), 7.75 (d, J = 9.6 Hz, 1H), 7.62 (t, J = 6.8 Hz, 2H), 7.34 (q, J = 7.0 Hz, 2H), 6.93 (s, 1H), 3.59 (q, J = 7.0 Hz, 4H), 1.23 (t, J = 7.0 Hz, 6H); <sup>13</sup>C NMR (126 MHz, DMSO-*d*<sub>6</sub>) δ 150.42, 150.35, 149.35, 148.83, 148.62, 146.59, 143.27, 140.02, 139.73, 139.63, 137.57, 137.56, 136.52, 135.87, 135.80, 131.13, 130.71, 129.86, 124.45, 123.61, 123.58, 100.66, 44.81, 13.09; HRMS (ESI): Calcd. for C<sub>26</sub>H<sub>24</sub>N<sub>5</sub> [M+H]<sup>+</sup>: 406.20262; found: 406.20166.

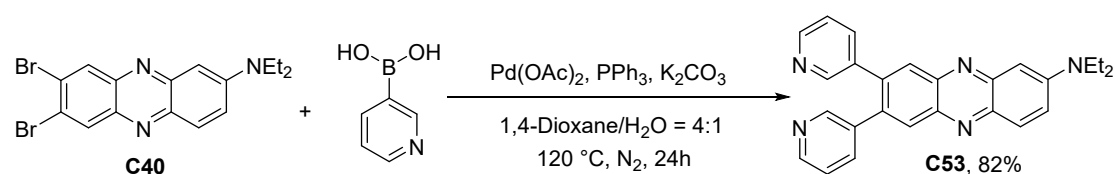

## 6. Single Crystal X-ray Diffraction of C44

Single crystals of C<sub>17</sub>H<sub>16</sub>ClN<sub>3</sub> **C44** were red block. X-Ray diffraction data of one these crystals were collected on a SuperNova, Dual, Cu at zero, AtlasS2 diffractometer. The crystal was kept at 179.99(10) K during data collection. The measurements were performed with Cu-Kα radiation (λ = 1.54184 Å).

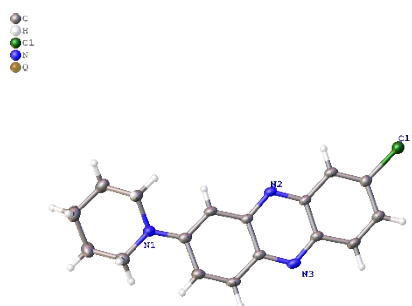

Figure S3. Molecular structure of **C44** (CCDC 2142278)

Table S1. Crystal data and structure refinement for **C44**.

|                     |                                                  |
|---------------------|--------------------------------------------------|
| Identification code | C44                                              |
| Empirical formula   | C <sub>17</sub> H <sub>16</sub> ClN <sub>3</sub> |
| Formula weight      | 297.78                                           |
| Temperature/K       | 179.99(10)                                       |
| Crystal system      | triclinic                                        |
| Space group         | P-1                                              |
| a/Å                 | 6.7166(12)                                       |
| b/Å                 | 9.3699(17)                                       |
| c/Å                 | 12.656(2)                                        |
| α/°                 | 68.667(17)                                       |
| β/°                 | 79.026(15)                                       |
| γ/°                 | 72.896(16)                                       |

|                                             |                                                               |
|---------------------------------------------|---------------------------------------------------------------|
| Volume/Å <sup>3</sup>                       | 706.0(2)                                                      |
| Z                                           | 2                                                             |
| $\rho_{\text{calc}}/\text{cm}^3$            | 1.401                                                         |
| $\mu/\text{mm}^{-1}$                        | 2.351                                                         |
| F(000)                                      | 312.0                                                         |
| Crystal size/mm <sup>3</sup>                | 0.13 × 0.12 × 0.11                                            |
| Radiation                                   | Cu K $\alpha$ ( $\lambda = 1.54184$ )                         |
| 2 $\theta$ range for data collection/°      | 7.532 to 147.762                                              |
| Index ranges                                | -8 ≤ h ≤ 8, -11 ≤ k ≤ 10, -15 ≤ l ≤ 15                        |
| Reflections collected                       | 4355                                                          |
| Independent reflections                     | 2737 [R <sub>int</sub> = 0.0427, R <sub>sigma</sub> = 0.0652] |
| Data/restraints/parameters                  | 2737/3/194                                                    |
| Goodness-of-fit on F <sup>2</sup>           | 1.047                                                         |
| Final R indexes [I ≥ 2 $\sigma$ (I)]        | R <sub>1</sub> = 0.0670, wR <sub>2</sub> = 0.1771             |
| Final R indexes [all data]                  | R <sub>1</sub> = 0.0893, wR <sub>2</sub> = 0.1991             |
| Largest diff. peak/hole / e Å <sup>-3</sup> | 0.38/-0.41                                                    |

## 7. Analytical data of the obtained compounds

### *N,N*-diethylphenazin-2-amine (C1)

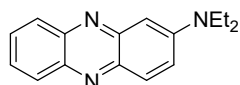

Red solid, m.p.: 100.1 – 101.1 °C; <sup>1</sup>H NMR (500 MHz, DMSO-*d*<sub>6</sub>)  $\delta$  8.06 (d, J = 10.0 Hz, 1H), 7.97 (d, J = 10.0 Hz, 2H), 7.77 (t, J = 5.0 Hz, 1H), 7.71 (dd, J = 9.6 Hz, 2.6 Hz, 1H), 7.65 (t, J = 10.0 Hz, 1H), 6.93 (d, J = 5.0 Hz, 1H), 3.58 - 3.54 (m, 4H), 1.20 (t, J = 10.0 Hz, 6H); <sup>13</sup>C NMR (126 MHz, DMSO-*d*<sub>6</sub>)  $\delta$  148.98, 146.01, 143.91, 140.46, 139.24, 130.60, 130.55, 129.71, 128.45, 127.62, 123.97, 100.81, 44.72, 13.05; HRMS (ESI): Calcd. for C<sub>16</sub>H<sub>18</sub>N<sub>3</sub> [M+H]<sup>+</sup>: 252.14952; found: 252.14914.

### *N*-methylphenazin-2-amine (C2)

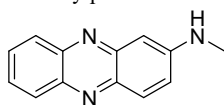

Red solid, m.p.: 165 – 166 °C; <sup>1</sup>H NMR (500 MHz, DMSO-*d*<sub>6</sub>)  $\delta$  8.06 (d, J = 10.0 Hz, 1H), 7.98 (d, J = 10.0 Hz, 1H), 7.88 (d, J = 10.0 Hz, 1H), 7.78 – 7.75 (m, 1H), 7.67 – 7.64 (m, 1H), 7.45 (dd, J = 9.6 Hz, 2.6 Hz, 1H), 7.10 (d, J = 5.0 Hz, 1H), 6.69 (d, J = 2.0 Hz, 1H), 2.89 (d, J = 5.0 Hz, 3H); <sup>13</sup>C NMR (126 MHz, DMSO-*d*<sub>6</sub>)  $\delta$  151.54, 146.64, 143.57, 140.30, 140.13, 130.45, 130.14, 129.63, 128.39, 127.51, 127.38, 97.69, 29.93; HRMS (ESI): Calcd. for C<sub>13</sub>H<sub>12</sub>N<sub>3</sub> [M+H]<sup>+</sup>: 210.10257; found: 210.10239.

### *N*-benzylphenazin-2-amine (C3)

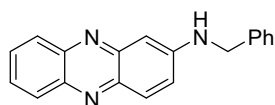

Red solid, m.p.: 98.5 – 99.5 °C; <sup>1</sup>H NMR (500 MHz, DMSO-*d*<sub>6</sub>)  $\delta$  8.05 (d, J = 10.0 Hz, 1H), 7.96 (d, J = 5.0 Hz, 1H), 7.91 (d, J = 10.0 Hz, 1H), 7.75 (t, J = 10.0 Hz, 1H), 7.65 (t, J = 5.0 Hz, 2H), 7.59 (dd, J = 10.0 Hz, 5.0 Hz, 1H), 7.46 (d, J = 10.0 Hz, 2H), 7.37 (t, J = 5.0 Hz, 2H), 7.26 (t, J = 10.0 Hz, 1H), 6.72 (d, J = 5.0 Hz, 1H), 4.50 (d, J = 10.0 Hz, 2H); <sup>13</sup>C NMR



(126 MHz, DMSO-*d*<sub>6</sub>) δ 150.39, 146.34, 143.53, 140.24, 140.21, 139.12, 130.50, 130.27, 129.63, 128.98, 128.40, 127.88, 127.68, 127.50, 99.05, 46.88; HRMS (ESI): Calcd. for C<sub>19</sub>H<sub>16</sub>N<sub>3</sub> [M+H]<sup>+</sup>: 286.13387; found: 286.13330.

*N*-phenylphenazin-2-amine (C4)

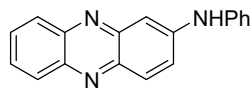

Red solid, m.p.: 193 – 194 °C; <sup>1</sup>H NMR (500 MHz, DMSO-*d*<sub>6</sub>) δ 9.19 (s, 1H), 8.10 (d, *J* = 8.6 Hz, 1H), 8.06 - 8.01 (m, 2H), 7.80 (t, *J* = 6.8 Hz, 1H), 7.73 - 7.69 (m, 2H), 7.49 (s, 1H), 7.44 - 7.39 (m, 4H), 7.09 (t, *J* = 6.8 Hz, 1H); <sup>13</sup>C NMR (126 MHz, DMSO-*d*<sub>6</sub>) δ 146.46, 145.80, 143.69, 141.40, 141.03, 140.53, 130.85, 130.76, 129.93, 129.72, 128.73, 128.57, 127.67, 123.24, 120.52, 102.93; HRMS (ESI): Calcd. for C<sub>18</sub>H<sub>14</sub>N<sub>3</sub> [M+H]<sup>+</sup>: 272.11822; found: 272.11786.

*N*-isopropylphenazin-2-amine (C5)

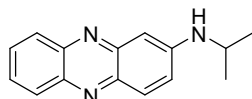

Yellow oil; <sup>1</sup>H NMR (500 MHz, DMSO-*d*<sub>6</sub>) δ 8.04 (d, *J* = 5.0 Hz, 1H), 7.97 (d, *J* = 5.0 Hz, 1H), 7.87 (d, *J* = 10.0 Hz, 1H), 7.75 (t, *J* = 5.0 Hz, 1H), 7.63 (t, *J* = 10.0 Hz, 1H), 7.46 (d, *J* = 5.0 Hz, 1H), 6.91 (d, *J* = 5.0 Hz, 1H), 6.73 (s, 1H), 3.79 – 3.73 (m, 1H), 1.25 (d, *J* = 5.0 Hz, 6H); <sup>13</sup>C NMR (126 MHz, DMSO-*d*<sub>6</sub>) δ 149.66, 146.66, 143.62, 140.14, 130.42, 130.24, 129.63, 128.33, 127.85, 127.41, 98.15, 43.89, 22.27; HRMS (ESI): Calcd. for C<sub>15</sub>H<sub>16</sub>N<sub>3</sub> [M+H]<sup>+</sup>: 238.13387; found: 238.13354.

*N*-butylphenazin-2-amine (C6)

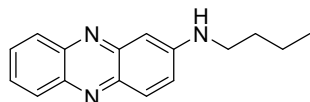

Orange solid, m.p.: 135.4 – 136.4 °C; <sup>1</sup>H NMR (500 MHz, DMSO-*d*<sub>6</sub>) δ 8.05 (d, *J* = 10.0 Hz, 1H), 7.97 (d, *J* = 10.0 Hz, 1H), 7.87 (d, *J* = 10.0 Hz, 1H), 7.75 (t, *J* = 10.0 Hz, 1H), 7.64 (t, *J* = 10.0 Hz, 1H), 7.48 (dd, *J* = 10.0, 2.0 Hz, 1H), 7.03 (t, *J* = 5.0 Hz, 1H), 6.71 (s, 1H), 3.21 (q, *J* = 5.0 Hz, 2H), 1.67 - 1.62 (m, 2H), 1.48 - 1.40 (m, 2H), 0.94 (t, *J* = 5.0 Hz, 3H); <sup>13</sup>C NMR (126 MHz, DMSO-*d*<sub>6</sub>) δ 150.71, 146.66, 143.60, 140.26, 140.12, 130.41, 130.16, 129.63, 128.35, 127.57, 127.42, 97.76, 42.84, 30.55, 20.37, 14.22; HRMS (ESI): Calcd. for C<sub>16</sub>H<sub>18</sub>N<sub>3</sub> [M+H]<sup>+</sup>: 252.14952; found: 252.14937.

3-fluoro-*N*-methylphenazin-2-amine (C7)

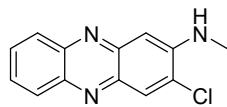

Orange solid, m.p.: 169 – 170 °C; <sup>1</sup>H NMR (500 MHz, DMSO-*d*<sub>6</sub>) δ 8.16 (s, 1H), 8.07 (d, *J* = 5.0 Hz, 1H), 8.01 (d, *J* = 5.0 Hz, 1H), 7.81 (t, *J* = 7.4 Hz, 1H), 7.71 (t, *J* = 7.4 Hz, 1H), 6.89 (s, 1H), 6.79 (q, *J* = 5.0 Hz, 1H), 2.95 (d, *J* = 4.8 Hz, 3H); <sup>13</sup>C NMR (126 MHz, DMSO-*d*<sub>6</sub>) δ 146.93, 144.95, 143.71, 140.65, 138.79, 130.94, 130.05, 129.60, 128.77, 128.63, 128.47, 100.20, 30.55; HRMS (ESI): Calcd. for C<sub>13</sub>H<sub>11</sub>ClN<sub>3</sub> [M+H]<sup>+</sup>: 244.06360; found: 244.06325.

3-chloro-*N*-methylphenazin-2-amine (C8)

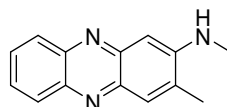

Red solid, m.p.: 193 – 194 °C; <sup>1</sup>H NMR (500 MHz, DMSO-*d*<sub>6</sub>) δ 8.05 (d, *J* = 8.6 Hz, 1H), 7.99 (d, *J* = 8.6 Hz, 1H), 7.77 (s, 1H), 7.74 (t, *J* = 7.6 Hz, 1H), 7.64 (t, *J* = 7.6 Hz, 1H), 6.74 (s, 1H), 6.48 – 6.45 (m, 1H), 2.93 (d, *J* = 4.6 Hz, 3H), 2.40 (s,

3H);  $^{13}\text{C}$  NMR (126 MHz,  $\text{DMSO-}d_6$ )  $\delta$  150.88, 145.73, 143.23, 140.30, 140.07, 135.31, 129.87, 129.52, 128.64, 128.42, 127.37, 98.07, 30.50, 18.77; HRMS (ESI): Calcd. for  $\text{C}_{14}\text{H}_{14}\text{N}_3$   $[\text{M}+\text{H}]^+$ : 224.11822; found: 224.11769.

*N*,3-dimethylphenazin-2-amine (**C9**)

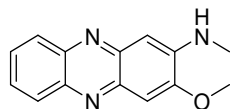

Orange solid, m.p.: 196 – 197 °C;  $^1\text{H}$  NMR (500 MHz,  $\text{DMSO-}d_6$ )  $\delta$  8.02 (d,  $J$  = 8.4 Hz, 1H), 7.98 (d,  $J$  = 10.0 Hz, 1H), 7.71 (t,  $J$  = 5.0 Hz, 1H), 7.64 (t,  $J$  = 10.0 Hz, 1H), 7.28 (s, 1H), 6.73 – 6.71 (m, 1H), 6.70 (s, 1H), 4.07 (s, 3H), 2.92 (d,  $J$  = 5.0 Hz, 3H);  $^{13}\text{C}$  NMR (126 MHz,  $\text{DMSO-}d_6$ )  $\delta$  154.00, 145.17, 143.67, 142.05, 141.31, 140.18, 128.89, 128.86, 128.32, 127.31, 103.92, 97.83, 56.83, 29.91; HRMS (ESI): Calcd. for  $\text{C}_{14}\text{H}_{14}\text{N}_3\text{O}$   $[\text{M}+\text{H}]^+$ : 240.11314; found: 240.11266.

1-fluoro-*N*-methylphenazin-2-amine (**C10**)

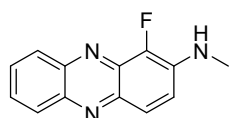

Orange solid, m.p.: 163 – 164 °C;  $^1\text{H}$  NMR (500 MHz,  $\text{DMSO-}d_6$ )  $\delta$  8.07 (d,  $J$  = 8.6 Hz, 1H), 8.02 (d,  $J$  = 8.6 Hz, 1H), 7.81 – 7.76 (m, 2H), 7.71 (t,  $J$  = 7.6 Hz, 1H), 7.13 – 7.09 (m, 1H), 6.89 (d,  $J$  = 9.4 Hz, 1H), 2.93 (d,  $J$  = 4.8 Hz, 3H);  $^{13}\text{C}$  NMR (126 MHz,  $\text{DMSO-}d_6$ )  $\delta$  156.66 (d,  $J$  = 258.6 Hz), 144.15, 143.00, 142.86, 140.44, 139.38 (d,  $J$  = 13.4 Hz), 130.37, 129.24, 128.62, 128.26, 110.78 (d,  $J$  = 18.4 Hz), 100.40 (d,  $J$  = 5.2 Hz), 29.86;  $^{19}\text{F}$  NMR (471 MHz,  $\text{DMSO-}d_6$ )  $\delta$  -121.02 (t,  $J$  = 11.0 Hz); HRMS (ESI): Calcd. for  $\text{C}_{13}\text{H}_{11}\text{FN}_3$   $[\text{M}+\text{H}]^+$ : 228.09315; found: 228.09271.

*N*-ethyl-4-methylphenazin-2-amine (**C11**)

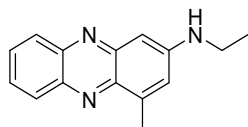

Orange solid, m.p.: 140.4 – 141.4 °C;  $^1\text{H}$  NMR (400 MHz,  $\text{CDCl}_3$ )  $\delta$  8.15 (d,  $J$  = 8.6 Hz, 1H), 8.04 (d,  $J$  = 8.6 Hz, 1H), 7.74 – 7.68 (m, 1H), 7.64 – 7.58 (m, 1H), 7.00 (s, 1H), 6.80 (s, 1H), 4.27 (s, 1H), 3.33 (p,  $J$  = 7.0, 6.4 Hz, 2H), 2.78 (s, 3H), 1.34 (t,  $J$  = 8.0 Hz, 3H);  $^{13}\text{C}$  NMR (101 MHz,  $\text{CDCl}_3$ )  $\delta$  148.97, 146.48, 143.37, 140.45, 140.14, 138.57, 129.90, 128.11, 127.02, 124.76, 98.30, 38.10, 17.67, 14.32; HRMS (ESI): Calcd. for  $\text{C}_{15}\text{H}_{16}\text{N}_3$   $[\text{M}+\text{H}]^+$ : 238.13387; found: 238.13358.

*N,N*,4-trimethylphenazin-2-amine (**C12**)

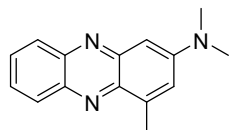

Orange solid, m.p.: 120 – 121 °C;  $^1\text{H}$  NMR (500 MHz,  $\text{CDCl}_3$ )  $\delta$  8.12 (d,  $J$  = 8.6 Hz, 1H), 8.01 (d,  $J$  = 8.6 Hz, 1H), 7.70 – 7.66 (m, 1H), 7.59 – 7.55 (m, 1H), 7.29 (s, 1H), 6.81 (d,  $J$  = 2.4 Hz, 1H), 3.09 (s, 6H), 2.80 (s, 3H);  $^{13}\text{C}$  NMR (126 MHz,  $\text{CDCl}_3$ )  $\delta$  150.86, 145.54, 143.26, 140.22, 139.63, 138.25, 130.02, 129.90, 127.71, 126.89, 121.60, 100.35, 40.25, 18.15; HRMS (ESI): Calcd. for  $\text{C}_{15}\text{H}_{16}\text{N}_3$   $[\text{M}+\text{H}]^+$ : 238.13387; found: 238.13348.

*N,N*-dimethylphenazin-2-amine (**C13**)

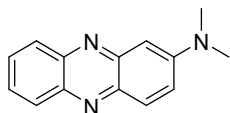

Orange solid, m.p.: 160 – 161 °C; <sup>1</sup>H NMR (500 MHz, DMSO-*d*<sub>6</sub>) δ 8.08 (d, *J* = 10.0 Hz, 1H), 8.00 (d, *J* = 5.0 Hz, 1H), 7.99 (d, *J* = 5.0 Hz, 1H), 7.80 – 7.77 (m, 2H), 7.68 (t, *J* = 10.0 Hz, 1H), 6.94 (d, *J* = 5.0 Hz, 1H), 3.17 (s, 6H); <sup>13</sup>C NMR (126 MHz, DMSO-*d*<sub>6</sub>) δ 151.44, 145.66, 143.87, 140.61, 139.36, 130.67, 130.20, 129.70, 128.56, 127.93, 124.15, 101.96, 40.45; HRMS (ESI): Calcd. for C<sub>14</sub>H<sub>14</sub>N<sub>3</sub> [M+H]<sup>+</sup>: 224.11822; found: 224.11794.

*N*-benzyl-*N*-ethylphenazin-2-amine (C14)

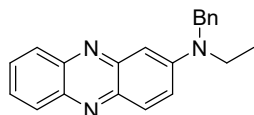

Red solid, m.p.: 100 – 101 °C; <sup>1</sup>H NMR (500 MHz, CDCl<sub>3</sub>) δ 8.11 (d, *J* = 8.6 Hz, 1H), 8.05 (d, *J* = 8.6 Hz, 1H), 8.00 (d, *J* = 9.8 Hz, 1H), 7.72 (t, *J* = 7.6 Hz, 1H), 7.64 – 7.60 (m, 1H), 7.53 (dd, *J* = 9.8, 2.8 Hz, 1H), 7.36 – 7.31 (m, 2H), 7.27 (d, *J* = 6.8 Hz, 3H), 7.16 (s, 1H), 4.76 (s, 2H), 3.69 (q, *J* = 7.2 Hz, 2H), 1.35 (t, *J* = 7.2 Hz, 3H); <sup>13</sup>C NMR (126 MHz, CDCl<sub>3</sub>) δ 149.61, 145.68, 143.86, 140.96, 139.58, 137.55, 130.54, 130.17, 129.55, 128.86, 128.29, 127.48, 127.31, 126.41, 122.95, 102.37, 53.80, 45.81, 12.26; HRMS (ESI): Calcd. for C<sub>21</sub>H<sub>20</sub>N<sub>3</sub> [M+H]<sup>+</sup>: 314.16517; found: 314.16470.

*N,N*-dibenzylphenazin-2-amine (C15)

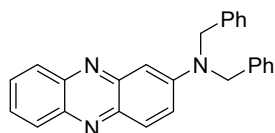

Red solid, m.p.: 172.7 – 173.7°C; <sup>1</sup>H NMR (500 MHz, DMSO-*d*<sub>6</sub>) δ 8.06 (d, *J* = 5.0 Hz, 1H), 7.97 (t, *J* = 10.0 Hz, 2H), 7.76 (t, *J* = 10.0 Hz, 2H), 7.67 (t, *J* = 10.0 Hz, 1H), 7.36 (d, *J* = 5.0 Hz, 8H), 7.28 – 7.25 (m, 2H), 6.97 (s, 1H), 4.99 (s, 4H); <sup>13</sup>C NMR (126 MHz, DMSO-*d*<sub>6</sub>) δ 149.94, 145.38, 143.81, 140.80, 139.32, 138.39, 130.77, 130.44, 129.69, 129.18, 128.58, 128.19, 127.51, 127.03, 124.21, 103.23, 55.01; HRMS (ESI): Calcd. for C<sub>26</sub>H<sub>22</sub>N<sub>3</sub> [M+H]<sup>+</sup>: 376.18082; found: 376.18005.

3-methylphenazin-2-amine (C16)

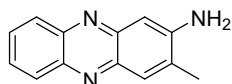

Red oil; <sup>1</sup>H NMR (500 MHz, DMSO-*d*<sub>6</sub>) δ 8.04 (d, *J* = 10.0 Hz, 1H), 7.98 (d, *J* = 10.0 Hz, 1H), 7.80 (s, 1H), 7.73 (t, *J* = 10.0 Hz, 1H), 7.64 (t, *J* = 10.0 Hz, 1H), 7.03 (s, 1H), 6.29 (s, 2H), 2.41 (s, 3H); <sup>13</sup>C NMR (126 MHz, DMSO-*d*<sub>6</sub>) δ 151.22, 145.41, 143.31, 140.35, 139.90, 135.17, 129.94, 129.59, 128.96, 128.53, 127.43, 102.17, 18.83; HRMS (ESI): Calcd. for C<sub>13</sub>H<sub>12</sub>N<sub>3</sub> [M+H]<sup>+</sup>: 210.10257; found: 210.10236.

1,4-dimethylphenazin-2-amine (C17)

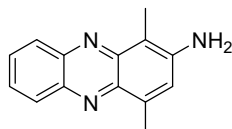

Orange solid, m.p.: 162.6 – 163.6 °C; <sup>1</sup>H NMR (500 MHz, DMSO-*d*<sub>6</sub>) δ 8.08 (d, *J* = 8.4 Hz, 1H), 8.02 (d, *J* = 10.0 Hz, 1H), 7.76 (t, *J* = 5.0 Hz, 1H), 7.65 (t, *J* = 5.0 Hz, 1H), 7.36 (s, 1H), 6.09 (s, 2H), 2.69 (s, 3H), 2.46 (s, 3H); <sup>13</sup>C NMR (126 MHz, DMSO-*d*<sub>6</sub>) δ 147.72, 144.97, 142.69, 139.65, 138.78, 135.11, 130.16, 129.79, 128.72, 127.31, 125.95, 105.84, 17.75, 10.45; HRMS (ESI): Calcd. for C<sub>14</sub>H<sub>14</sub>N<sub>3</sub> [M+H]<sup>+</sup>: 224.11822; found: 224.11798.

3-(tert-butyl)phenazin-2-amine (C18)

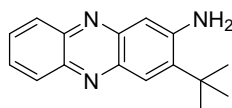

Orange solid, m.p.: 185 – 186 °C; <sup>1</sup>H NMR (500 MHz, DMSO-*d*<sub>6</sub>) δ 8.04 (d, *J* = 10.0 Hz, 1H), 7.98 (d, *J* = 10.0 Hz, 1H), 7.86 (s, 1H), 7.74 (t, *J* = 7.2 Hz, 1H), 7.64 (t, *J* = 5.0 Hz, 1H), 7.12 (s, 1H), 6.20 (s, 2H), 1.51 (s, 9H); <sup>13</sup>C NMR (126 MHz, DMSO-*d*<sub>6</sub>) δ 150.71, 145.01, 144.77, 143.80, 140.64, 139.73, 130.17, 129.64, 128.59, 127.46, 126.46, 104.68, 35.56, 29.77; HRMS (ESI): Calcd. for C<sub>16</sub>H<sub>18</sub>N<sub>3</sub> [M+H]<sup>+</sup>: 252.14952; found: 252.14922.

#### 3-benzylphenazin-2-amine (C19)

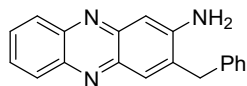

Orange solid, m.p.: 90 - 91 °C; <sup>1</sup>H NMR (500 MHz, DMSO-*d*<sub>6</sub>) δ 7.99 (t, *J* = 8.6 Hz, 2H), 7.74 (t, *J* = 5.0 Hz, 1H), 7.63 (t, *J* = 5.0 Hz, 1H), 7.50 (s, 1H), 7.37 (d, *J* = 5.0 Hz, 4H), 7.30 – 7.27 (m, 1H), 7.08 (s, 1H), 6.34 (s, 2H), 4.12 (s, 2H); <sup>13</sup>C NMR (126 MHz, DMSO-*d*<sub>6</sub>) δ 150.59, 145.25, 143.50, 140.44, 139.65, 138.91, 138.19, 130.17, 129.81, 129.59, 129.11, 129.07, 128.55, 127.60, 126.95, 102.89, 37.12; HRMS (ESI): Calcd. for C<sub>19</sub>H<sub>16</sub>N<sub>3</sub> [M+H]<sup>+</sup>: 286.13387; found: 286.13339.

#### 1-benzylphenazin-2-amine (C19')

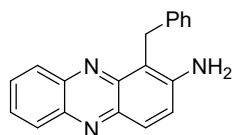

Orange solid, m.p.: 124 - 125 °C; <sup>1</sup>H NMR (500 MHz, DMSO-*d*<sub>6</sub>) δ 8.08 (d, *J* = 10.0 Hz, 1H), 8.03 (d, *J* = 8.6 Hz, 1H), 7.88 (d, *J* = 10.0 Hz, 1H), 7.77 (t, *J* = 7.6 Hz, 1H), 7.68 (t, *J* = 5.0 Hz, 1H), 7.55 (d, *J* = 5.0 Hz, 1H), 7.31 (d, *J* = 7.6 Hz, 2H), 7.17 (t, *J* = 10.0 Hz, 2H), 7.08 (t, *J* = 7.2 Hz, 1H), 6.27 (s, 2H), 4.53 (s, 2H); <sup>13</sup>C NMR (126 MHz, DMSO-*d*<sub>6</sub>) δ 148.00, 144.52, 143.06, 141.45, 139.91, 130.42, 129.51, 128.99, 128.96, 128.86, 128.45, 127.80, 127.69, 125.89, 111.09, 29.40; HRMS (ESI): Calcd. for C<sub>19</sub>H<sub>16</sub>N<sub>3</sub> [M+H]<sup>+</sup>: 286.13387; found: 286.13367.

#### 2-(phenazin-2-ylamino)ethan-1-ol (C20)

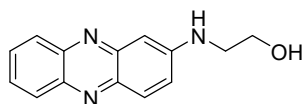

Red solid, m.p.: 176.6 – 177.6 °C; <sup>1</sup>H NMR (500 MHz, DMSO-*d*<sub>6</sub>) δ 8.04 (d, *J* = 10.0 Hz, 1H), 7.96 (d, *J* = 5.0 Hz, 1H), 7.86 (d, *J* = 10.0 Hz, 1H), 7.75 (t, *J* = 10.0 Hz, 1H), 7.64 (t, *J* = 10.0 Hz, 1H), 7.54 (dd, *J* = 10.0, 5.0 Hz, 1H), 7.18 (t, *J* = 5.0 Hz, 1H), 6.75 (d, *J* = 2.0 Hz, 1H), 3.70 (d, *J* = 5.0 Hz, 2H), 3.31 (q, *J* = 5.0 Hz, 2H); <sup>13</sup>C NMR (126 MHz, DMSO-*d*<sub>6</sub>) δ 150.85, 146.59, 143.55, 140.25, 140.09, 130.47, 130.10, 129.60, 128.31, 127.71, 127.50, 97.84, 59.39, 45.99; HRMS (ESI): Calcd. for C<sub>14</sub>H<sub>14</sub>N<sub>3</sub>O [M+H]<sup>+</sup>: 240.11314; found: 240.11290.

#### N-allylphenazin-2-amine (C21)

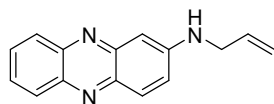

Orange solid, m.p.: 158 – 159 °C; <sup>1</sup>H NMR (500 MHz, DMSO-*d*<sub>6</sub>) δ 8.06 (d, *J* = 10.0 Hz, 1H), 7.98 (d, *J* = 10.0 Hz, 1H), 7.90 (d, *J* = 10.0 Hz, 1H), 7.77 (t, *J* = 5.0 Hz, 1H), 7.66 (t, *J* = 5.0 Hz, 1H), 7.52 (d, *J* = 10.0 Hz, 1H), 7.25 (s, 1H), 6.75 (s, 1H), 6.01 - 5.95 (m, 1H), 5.35 (d, *J* = 16.0 Hz, 1H), 5.21 (d, *J* = 10.0 Hz, 1H), 3.92 (s, 2H); <sup>13</sup>C NMR (126 MHz, DMSO-*d*<sub>6</sub>) δ 150.43, 146.44, 143.58, 140.23, 140.20, 135.04, 130.50, 130.21, 129.64, 128.43, 127.64, 127.42, 116.73, 98.82, 45.58; HRMS (ESI): Calcd. for C<sub>15</sub>H<sub>14</sub>N<sub>3</sub> [M+H]<sup>+</sup>: 236.11822; found: 236.11777.

#### 3-(phenazin-2-ylamino)propanenitrile (C22)

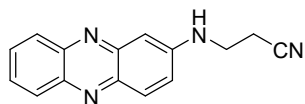

Orange solid, m.p.: 107.6 – 108.6 °C; <sup>1</sup>H NMR (500 MHz, DMSO-*d*<sub>6</sub>) δ 8.08 (d, *J* = 10.0 Hz, 1H), 8.00 (d, *J* = 5.0 Hz, 1H), 7.93 (d, *J* = 10.0 Hz, 1H), 7.79 (t, *J* = 10.0 Hz, 1H), 7.69 (t, *J* = 10.0 Hz, 1H), 7.51 (dd, *J* = 10.0, 5.0 Hz, 1H), 7.33 (t, *J* = 5.0 Hz, 1H), 6.89 (d, *J* = 5.0 Hz, 1H), 3.59 (q, *J* = 5.0 Hz, 2H), 2.90 (t, *J* = 5.0 Hz, 2H); <sup>13</sup>C NMR (126 MHz, DMSO-*d*<sub>6</sub>) δ 149.76, 146.34, 143.56, 140.41, 140.20, 130.64, 130.48, 129.68, 128.49, 127.95, 127.19, 120.03, 98.99, 39.12, 17.28; HRMS (ESI): Calcd. for C<sub>15</sub>H<sub>13</sub>N<sub>4</sub> [M+H]<sup>+</sup>: 249.11347; found: 249.11304.

#### 2-(piperidin-1-yl)phenazine (C23)

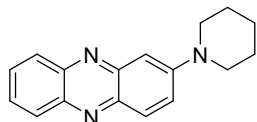

Orange solid, m.p.: 139.5 – 140.5 °C; <sup>1</sup>H NMR (500 MHz, DMSO-*d*<sub>6</sub>) δ 8.10 (d, *J* = 10.0 Hz, 1H), 8.04 (d, *J* = 5.0 Hz, 1H), 7.98 (d, *J* = 10.0 Hz, 1H), 7.91 (dd, *J* = 9.6, 2.6 Hz, 1H), 7.81 (t, *J* = 10.0 Hz, 1H), 7.72 (t, *J* = 5.0 Hz, 1H), 7.17 (s, 1H), 3.49 (t, *J* = 5.0 Hz, 4H), 1.68 – 1.65 (m, 6H); <sup>13</sup>C NMR (126 MHz, DMSO-*d*<sub>6</sub>) δ 152.21, 145.72, 143.72, 141.07, 139.96, 130.74, 130.07, 129.69, 128.73, 128.45, 126.20, 105.19, 48.96, 25.50, 24.40; HRMS (ESI): Calcd. for C<sub>17</sub>H<sub>18</sub>N<sub>3</sub> [M+H]<sup>+</sup>: 264.14952; found: 264.14929.

#### 2-(pyrrolidin-1-yl)phenazine (C24)

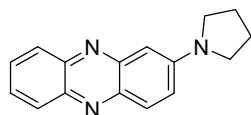

Orange solid, m.p.: 158 – 159 °C; <sup>1</sup>H NMR (500 MHz, DMSO-*d*<sub>6</sub>) δ 8.06 (d, *J* = 10.0 Hz, 1H), 7.98 (d, *J* = 10.0 Hz, 2H), 7.77 (t, *J* = 10.0 Hz, 1H), 7.66 (t, *J* = 5.0 Hz, 1H), 7.60 (dd, *J* = 10.0, 5.0 Hz, 1H), 6.77 (d, *J* = 5.0 Hz, 1H), 3.48 (t, *J* = 5.0 Hz, 4H), 2.03 (t, *J* = 5.0 Hz, 4H); <sup>13</sup>C NMR (126 MHz, DMSO-*d*<sub>6</sub>) δ 148.73, 145.83, 143.92, 140.29, 139.45, 130.61, 130.46, 129.69, 128.42, 127.56, 124.72, 100.82, 48.13, 25.52; HRMS (ESI): Calcd. for C<sub>16</sub>H<sub>16</sub>N<sub>3</sub> [M+H]<sup>+</sup>: 250.13387; found: 250.13347.

#### 4-(phenazin-2-yl)morpholine (C25)

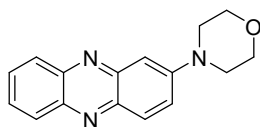

Orange solid, m.p.: 176.7 – 177.7 °C; <sup>1</sup>H NMR (500 MHz, DMSO-*d*<sub>6</sub>) δ 8.14 (d, *J* = 5.0 Hz, 1H), 8.08 (d, *J* = 5.0 Hz, 1H), 8.05 (d, *J* = 10.0 Hz, 1H), 7.95 (d, *J* = 10.0 Hz, 1H), 7.84 (t, *J* = 10.0 Hz, 1H), 7.77 (t, *J* = 5.0 Hz, 1H), 7.25 (d, *J* = 5.0 Hz, 1H), 3.81 (t, *J* = 5.0 Hz, 4H), 3.46 (t, *J* = 5.0 Hz, 4H); <sup>13</sup>C NMR (126 MHz, DMSO-*d*<sub>6</sub>) δ 152.30, 145.37, 143.69, 141.32, 140.13, 130.92, 130.17, 129.73, 128.90, 128.87, 125.51, 105.89, 66.37, 48.01; HRMS (ESI): Calcd. for C<sub>16</sub>H<sub>16</sub>N<sub>3</sub>O [M+H]<sup>+</sup>: 266.12879; found: 266.12842.

#### 3-(piperidin-1-yl)phenazin-2-amine (C26)

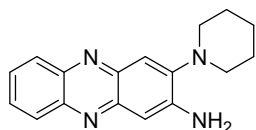

Yellow oil; <sup>1</sup>H NMR (500 MHz, DMSO-*d*<sub>6</sub>) δ 8.01 (d, *J* = 10.0 Hz, 1H), 7.97 (d, *J* = 10.0 Hz, 1H), 7.70 (t, *J* = 5.0 Hz, 1H), 7.63 (t, *J* = 5.0 Hz, 1H), 7.38 (s, 1H), 7.07 (s, 1H), 6.07 (s, 2H), 3.01 (s, 4H), 1.79 – 1.74 (m, 4H), 1.60 (d, *J* = 5.0 Hz,

1H); <sup>13</sup>C NMR (126 MHz, DMSO-*d*<sub>6</sub>) δ 149.68, 148.24, 144.00, 142.54, 141.01, 140.46, 129.21, 129.15, 128.49, 127.44, 115.35, 103.08, 52.53, 26.05, 24.27; HRMS (ESI): Calcd. for C<sub>17</sub>H<sub>19</sub>N<sub>4</sub> [M+H]<sup>+</sup>: 279.16042; found: 279.16019.

*N,N*-dimethylbenzo[*a*]phenazin-5-amine (C27)

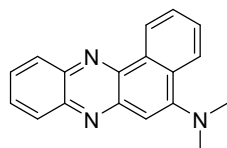

Orange solid, m.p.: 219.6 – 220.6 °C; <sup>1</sup>H NMR (500 MHz, DMSO-*d*<sub>6</sub>) δ 9.28 (d, *J* = 7.6 Hz, 1H), 8.27 (d, *J* = 8.2 Hz, 1H), 8.22 (d, *J* = 7.8 Hz, 1H), 8.15 (d, *J* = 8.2 Hz, 1H), 7.91 – 7.83 (m, 4H), 7.29 (s, 1H), 3.01 (s, 6H); <sup>13</sup>C NMR (126 MHz, DMSO-*d*<sub>6</sub>) δ 154.51, 144.89, 143.14, 140.63, 140.45, 131.71, 130.68, 130.24, 129.69, 129.38, 128.74, 128.50, 125.82, 125.72, 110.91, 44.43; HRMS (ESI): Calcd. for C<sub>18</sub>H<sub>16</sub>N<sub>3</sub> [M+H]<sup>+</sup>: 274.13387; found: 274.13348.

6-methylbenzo[*a*]phenazin-5-amine (C28)

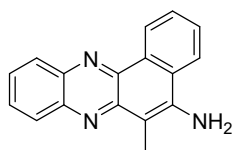

Orange solid, m.p.: 189.8 – 190.8 °C; <sup>1</sup>H NMR (500 MHz, DMSO-*d*<sub>6</sub>) δ 9.28 (d, *J* = 8.0 Hz, 1H), 8.41 (d, *J* = 10.0 Hz, 1H), 8.19 (d, *J* = 8.4 Hz, 1H), 8.09 (d, *J* = 8.4 Hz, 1H), 7.86 (t, *J* = 7.6 Hz, 1H), 7.80 (t, *J* = 5.0 Hz, 2H), 7.70 (t, *J* = 7.6 Hz, 1H), 6.51 (s, 2H), 2.62 (s, 3H); <sup>13</sup>C NMR (126 MHz, DMSO-*d*<sub>6</sub>) δ 145.30, 144.79, 142.91, 139.32, 138.60, 130.26, 130.12, 129.48, 128.46, 128.06, 127.78, 127.42, 125.52, 122.87, 105.80, 11.23; HRMS (ESI): Calcd. for C<sub>17</sub>H<sub>14</sub>N<sub>3</sub> [M+H]<sup>+</sup>: 260.11822; found: 260.11798.

*N*-phenylbenzo[*a*]phenazin-5-amine (C29)

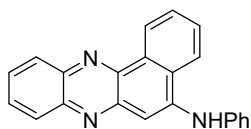

Orange solid, m.p.: 241.8 – 242.8 °C; <sup>1</sup>H NMR (500 MHz, DMSO-*d*<sub>6</sub>) δ 9.35 (d, *J* = 5.0 Hz, 1H), 8.90 (s, 1H), 8.57 (d, *J* = 7.8 Hz, 1H), 8.23 (d, *J* = 5.0 Hz, 1H), 8.03 (d, *J* = 8.4 Hz, 1H), 7.98 – 7.92 (m, 2H), 7.83 (t, *J* = 5.0 Hz, 1H), 7.77 (t, *J* = 5.0 Hz, 1H), 7.48 (d, *J* = 5.0 Hz, 4H), 7.26 (s, 1H), 7.20 – 7.16 (m, 1H); <sup>13</sup>C NMR (126 MHz, DMSO-*d*<sub>6</sub>) δ 145.64, 145.16, 143.39, 141.87, 139.99, 139.89, 131.48, 130.55, 130.49, 129.88, 129.67, 129.05, 128.85, 128.45, 128.37, 125.75, 123.96, 123.28, 123.17, 102.51; HRMS (ESI): Calcd. for C<sub>22</sub>H<sub>16</sub>N<sub>3</sub> [M+H]<sup>+</sup>: 322.13387; found: 322.13351.

*N,N*-diphenylphenazin-2-amine (C30)

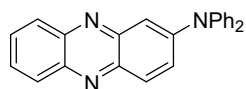

White solid, m.p.: 156.7-157.7 °C; <sup>1</sup>H NMR (500 MHz, DMSO-*d*<sub>6</sub>) δ 8.13 (d, *J* = 10.0 Hz, 1H), 8.05 (d, *J* = 10.0 Hz, 1H), 8.00 (d, *J* = 5.0 Hz, 1H), 7.83 (t, *J* = 10.0 Hz, 1H), 7.78 (t, *J* = 5.0 Hz, 1H), 7.56 (dd, *J* = 9.6, 2.6 Hz, 1H), 7.46 (t, *J* = 5.0 Hz, 4H), 7.28 (d, *J* = 10.0 Hz, 6H), 7.14 (d, *J* = 2.6 Hz, 1H); <sup>13</sup>C NMR (126 MHz, DMSO-*d*<sub>6</sub>) δ 149.72, 146.16, 144.88, 143.69, 141.78, 140.80, 131.23, 130.55, 130.44, 129.77, 129.49, 128.99, 128.04, 126.68, 126.03, 112.35; HRMS (ESI): Calcd. for C<sub>24</sub>H<sub>18</sub>N<sub>3</sub> [M+H]<sup>+</sup>: 348.14952; found: 348.14871.

*N*-(4-methoxyphenyl)phenazin-2-amine (C31)

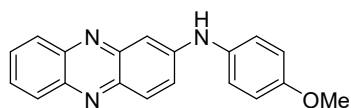

Orange solid, m.p.: 150 – 151 °C; <sup>1</sup>H NMR (500 MHz, DMSO-*d*<sub>6</sub>) δ 8.96 (s, 1H), 8.09 (d, *J* = 10.0 Hz, 1H), 8.02 (d, *J* = 10.0 Hz, 1H), 7.99 (d, *J* = 10.0 Hz, 1H), 7.79 (t, *J* = 10.0 Hz, 1H), 7.70 (t, *J* = 10.0 Hz, 1H), 7.64 (dd, *J* = 9.6, 2.6 Hz, 1H), 7.33 (d, *J* = 10.0 Hz, 2H), 7.23 (d, *J* = 2.6 Hz, 1H), 7.03 (d, *J* = 10.0 Hz, 2H), 3.79 (s, 3H); <sup>13</sup>C NMR (126 MHz, DMSO-*d*<sub>6</sub>) δ 156.15, 147.89, 146.06, 143.71, 140.76, 140.47, 133.96, 130.77, 130.73, 129.71, 128.63, 128.25, 127.45, 123.60, 115.24, 101.10, 55.78; HRMS (ESI): Calcd. for C<sub>19</sub>H<sub>16</sub>N<sub>3</sub>O [M+H]<sup>+</sup>: 302.12879; found: 302.12842.

5-methyl-1,2,3,4-tetrahydropyrido[3,2-*a*]phenazine (C32)

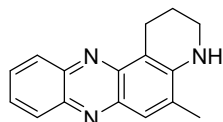

Orange solid, m.p.: 164.7 – 165.7 °C; <sup>1</sup>H NMR (500 MHz, DMSO-*d*<sub>6</sub>) δ 8.03 (d, *J* = 10.0 Hz, 1H), 7.99 (d, *J* = 5.0 Hz, 1H), 7.72 (t, *J* = 5.0 Hz, 1H), 7.65 (s, 1H), 7.62 (t, *J* = 5.0 Hz, 1H), 6.42 (s, 1H), 3.41 (s, 2H), 3.19 (t, *J* = 5.0 Hz, 2H), 2.35 (s, 3H), 1.95 - 1.92 (m, 2H); <sup>13</sup>C NMR (126 MHz, DMSO-*d*<sub>6</sub>) δ 145.89, 143.23, 142.67, 139.83, 139.79, 134.77, 129.68, 129.41, 128.74, 127.12, 126.85, 106.93, 41.43, 21.72, 20.59, 18.85; HRMS (ESI): Calcd. for C<sub>16</sub>H<sub>16</sub>N<sub>3</sub> [M+H]<sup>+</sup>: 250.13387; found: 250.13367.

1,2,3,4-tetrahydropyrido[2,3-*b*]phenazine (C33)

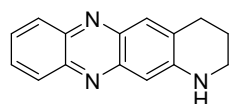

Orange solid, m.p.: 168 – 159 °C; <sup>1</sup>H NMR (500 MHz, DMSO-*d*<sub>6</sub>) δ 7.99 (d, *J* = 8.6 Hz, 1H), 7.91 (d, *J* = 8.6 Hz, 1H), 7.69 (t, *J* = 7.6 Hz, 1H), 7.67 (s, 1H), 7.58 (t, *J* = 7.6 Hz, 1H), 7.40 (s, 1H), 6.80 (s, 1H), 3.01 (t, *J* = 5.0 Hz, 2H), 1.91 - 1.87 (m, 2H), 1.26 - 1.17 (m, 2H); <sup>13</sup>C NMR (126 MHz, DMSO-*d*<sub>6</sub>) δ 148.98, 145.42, 143.45, 140.09, 139.81, 134.30, 129.95, 129.56, 128.27, 127.80, 126.96, 100.35, 41.08, 28.48, 21.11; HRMS (ESI): Calcd. for C<sub>15</sub>H<sub>14</sub>N<sub>3</sub> [M+H]<sup>+</sup>: 236.11822; found: 236.11787.

1,2,3,4-tetrahydropyrido[3,2-*a*]phenazine (C33')

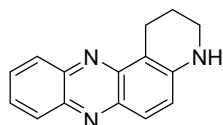

Orange solid, m.p.: 149.9 – 150.9 °C; <sup>1</sup>H NMR (400 MHz, CDCl<sub>3</sub>) δ 8.13 - 8.09 (m, 2H), 7.82 (d, *J* = 9.4 Hz, 1H), 7.72 - 7.69 (m, 1H), 7.64 - 7.59 (m, 1H), 7.11 (dd, *J* = 9.4, 2.0 Hz, 1H), 4.51 (s, 1H), 3.48 - 3.45 (m, 2H), 3.32 (t, *J* = 6.4 Hz, 2H), 2.12 - 2.06 (m, 2H); <sup>13</sup>C NMR (101 MHz, CDCl<sub>3</sub>) δ 144.82, 144.14, 143.32, 140.29, 140.22, 129.72, 129.31, 128.83, 128.32, 127.38, 125.64, 109.40, 41.74, 21.10, 21.00; HRMS (ESI): Calcd. for C<sub>15</sub>H<sub>14</sub>N<sub>3</sub> [M+H]<sup>+</sup>: 236.11822; found: 236.11787.

2-methyl-1,2,3,4-tetrahydropyrido[2,3-*b*]phenazine (C34)

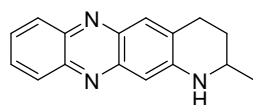

Orange solid, m.p.: 175.6 – 176.6 °C; <sup>1</sup>H NMR (500 MHz, DMSO-*d*<sub>6</sub>) δ 8.00 (d, *J* = 8.4 Hz, 1H), 7.92 (d, *J* = 8.6 Hz, 1H), 7.72 - 7.69 (m, 2H), 7.59 (t, *J* = 7.6 Hz, 1H), 7.28 (s, 1H), 6.84 (s, 1H), 3.58 - 3.54 (m, 1H), 3.10 - 2.97 (m, 2H), 2.02 - 1.99 (m, 1H), 1.55 - 1.48 (m, 1H), 1.25 (d, *J* = 6.4 Hz, 3H); <sup>13</sup>C NMR (126 MHz, DMSO-*d*<sub>6</sub>) δ 148.95, 145.44, 143.54, 140.17, 139.80, 134.03, 129.94, 129.57, 128.35, 127.61, 127.03, 100.47, 47.09, 29.14, 27.67, 22.46; HRMS (ESI): Calcd.

for  $C_{16}H_{16}N_3$   $[M+H]^+$ : 250.13387; found: 250.13354.

3-methyl-1,2,3,4-tetrahydropyrido[3,2-*a*]phenazine (**C34'**)

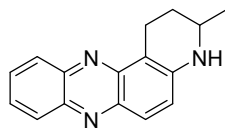

Orange solid, m.p.: 169.8 – 170.8 °C;  $^1H$  NMR (500 MHz,  $DMSO-d_6$ )  $\delta$  8.05 (d,  $J = 8.4$  Hz, 1H), 8.01 (d,  $J = 8.6$  Hz, 1H), 7.79 – 7.75 (m, 2H), 7.65 (t,  $J = 7.4$  Hz, 1H), 7.39 (d,  $J = 9.4$  Hz, 1H), 6.97 (s, 1H), 3.55 – 3.51 (m, 1H), 3.40 – 3.38 (m, 1H), 2.99 – 2.93 (m, 1H), 2.06 (d,  $J = 9.2$  Hz, 1H), 1.60 – 1.54 (m, 1H), 1.28 (d,  $J = 6.2$  Hz, 3H);  $^{13}C$  NMR (126 MHz,  $DMSO-d_6$ )  $\delta$  146.36, 144.08, 143.06, 140.25, 139.68, 130.28, 129.56, 128.70, 128.36, 127.27, 126.76, 106.63, 46.59, 28.79, 21.88, 20.74; HRMS (ESI): Calcd. for  $C_{16}H_{16}N_3$   $[M+H]^+$ : 250.13387; found: 250.13341.

2,3,4,5-tetrahydro-1*H*-azepino[2,3-*b*]phenazine (**C35**)

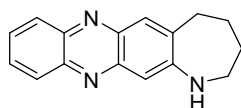

Orange solid, m.p.: 180 – 181 °C;  $^1H$  NMR (500 MHz,  $CDCl_3$ )  $\delta$  8.13 (d,  $J = 8.6$  Hz, 1H), 8.09 (d,  $J = 8.6$  Hz, 1H), 7.89 (s, 1H), 7.73 – 7.70 (m, 1H), 7.68 – 7.65 (m, 1H), 7.31 (s, 1H), 4.56 (s, 1H), 3.28 (d,  $J = 5.4$  Hz, 2H), 3.07 (t,  $J = 5.0$  Hz, 2H), 1.89 – 1.88 (m, 4H);  $^{13}C$  NMR (126 MHz,  $CDCl_3$ )  $\delta$  153.71, 144.16, 143.46, 142.00, 141.84, 140.98, 129.73, 129.57, 129.50, 128.82, 128.30, 111.22, 48.25, 35.70, 30.34, 26.94; HRMS (ESI): Calcd. for  $C_{16}H_{16}N_3$   $[M+H]^+$ : 250.13387; found: 250.13368.

2,3,4,5-tetrahydro-1*H*-azepino[3,2-*a*]phenazine (**C35'**)

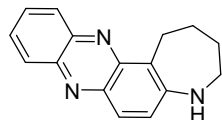

Orange solid, m.p.: 159 – 160 °C;  $^1H$  NMR (500 MHz,  $CDCl_3$ )  $\delta$  8.18 (dd,  $J = 15.0, 8.6$  Hz, 2H), 7.89 (d,  $J = 9.2$  Hz, 1H), 7.78 – 7.75 (m, 1H), 7.72 – 7.68 (m, 1H), 7.28 (d,  $J = 3.8$  Hz, 1H), 4.37 (s, 1H), 3.71 – 3.69 (m, 2H), 3.43 (t,  $J = 5.2$  Hz, 2H), 2.00 – 1.99 (m, 4H);  $^{13}C$  NMR (126 MHz,  $CDCl_3$ )  $\delta$  150.13, 144.50, 143.07, 140.73, 140.53, 129.62, 129.35, 129.21, 128.37, 128.18, 127.51, 120.48, 47.34, 30.92, 25.59, 25.06; HRMS (ESI): Calcd. for  $C_{16}H_{16}N_3$   $[M+H]^+$ : 250.13387; found: 250.13345.

*N,N*-diethyl-7,8-dimethylphenazin-2-amine (**C36**)

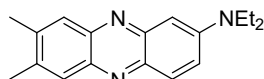

Orange solid, m.p.: 270.4 – 271.4 °C;  $^1H$  NMR (500 MHz,  $DMSO-d_6$ )  $\delta$  7.93 (d,  $J = 9.6$  Hz, 1H), 7.81 (s, 1H), 7.74 (s, 1H), 7.65 (dd,  $J = 9.6, 2.6$  Hz, 1H), 6.90 (d,  $J = 2.6$  Hz, 1H), 3.56 (q,  $J = 7.0$  Hz, 4H), 2.46 (d,  $J = 6.6$  Hz, 6H), 1.21 (t,  $J = 7.0$  Hz, 6H);  $^{13}C$  NMR (126 MHz,  $DMSO-d_6$ )  $\delta$  148.54, 145.54, 143.15, 141.35, 139.84, 138.54, 138.24, 130.37, 128.08, 126.98, 122.99, 101.33, 44.66, 20.62, 20.31, 13.08; HRMS (ESI): Calcd. for  $C_{18}H_{22}N_3$   $[M+H]^+$ : 280.18082; found: 280.18024.

7,8-dimethyl-*N*-phenylphenazin-2-amine (**C37**)



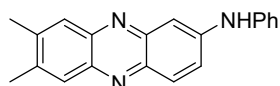

Orange solid, m.p.: 235 – 236 °C; <sup>1</sup>H NMR (500 MHz, DMSO-*d*<sub>6</sub>) δ 9.06 (s, 1H), 7.99 (d, *J* = 9.4 Hz, 1H), 7.83 (s, 1H), 7.76 (s, 1H), 7.63 (d, *J* = 11.2 Hz, 1H), 7.47 (s, 1H), 7.42 - 7.36 (m, 4H), 7.06 (t, *J* = 7.0 Hz, 1H), 2.45 (s, 6H); <sup>13</sup>C NMR (126 MHz, DMSO-*d*<sub>6</sub>) δ 145.76, 145.21, 142.95, 141.68, 140.42, 139.86, 139.30, 130.58, 129.91, 128.03, 127.19, 126.62, 122.88, 120.18, 103.64, 20.60, 20.36; HRMS (ESI): Calcd. for C<sub>20</sub>H<sub>18</sub>N<sub>3</sub> [M+H]<sup>+</sup>: 300.14952; found: 300.14926.

2,3-dichloro-7-(piperidin-1-yl)phenazine (C38)

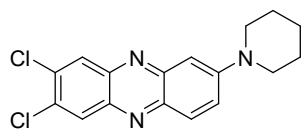

Orange solid, m.p.: 209 – 210 °C; <sup>1</sup>H NMR (400 MHz, CDCl<sub>3</sub>) δ 8.10 (s, 1H), 8.05 (s, 1H), 7.83 (d, *J* = 9.6 Hz, 1H), 7.59 (dd, *J* = 9.8, 2.8 Hz, 1H), 7.03 (s, 1H), 3.46 (t, *J* = 5.0 Hz, 4H), 1.72 – 1.70 (m, 6H); <sup>13</sup>C NMR (101 MHz, CDCl<sub>3</sub>) δ 152.35, 145.91, 142.13, 140.48, 139.45, 134.38, 131.73, 129.91, 129.65, 128.69, 125.76, 105.12, 49.13, 25.44, 24.33; HRMS (ESI): Calcd. for C<sub>17</sub>H<sub>16</sub>Cl<sub>2</sub>N<sub>3</sub> [M+H]<sup>+</sup>: 332.07158; found: 332.07089.

7,8-dichloro-*N,N*-diethylphenazin-2-amine (C39)

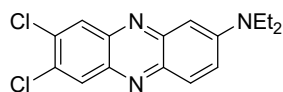

Orange solid, m.p.: 152.1 – 153.1 °C; <sup>1</sup>H NMR (500 MHz, CDCl<sub>3</sub>) δ 8.16 (s, 1H), 8.10 (s, 1H), 7.92 (d, *J* = 9.7 Hz, 1H), 7.52 (dd, *J* = 9.8, 2.8 Hz, 1H), 6.92 (d, *J* = 2.8 Hz, 1H), 3.56 (d, *J* = 7.2 Hz, 4H), 1.30 (t, *J* = 7.1 Hz, 6H); <sup>13</sup>C NMR (126 MHz, CDCl<sub>3</sub>) δ 149.31, 146.28, 142.54, 139.97, 139.07, 134.46, 131.06, 130.55, 129.76, 128.52, 123.51, 100.95, 45.06, 12.79; HRMS (ESI): Calcd. for C<sub>16</sub>H<sub>16</sub>Br<sub>2</sub>N<sub>3</sub> [M+H]<sup>+</sup>: 320.07158; found: 320.07101.

7,8-dibromo-*N,N*-diethylphenazin-2-amine (C40)

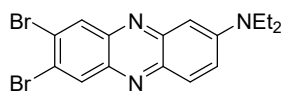

Orange solid, m.p.: 158 – 159 °C; <sup>1</sup>H NMR (500 MHz, DMSO-*d*<sub>6</sub>) δ 8.43 (s, 1H), 8.34 (s, 1H), 7.93 (d, *J* = 10.0 Hz, 1H), 7.78 (dd, *J* = 10.0, 5.0 Hz, 1H), 6.85 (d, *J* = 5.0 Hz, 1H), 3.59 (q, *J* = 5.0 Hz, 4H), 1.22 (t, *J* = 10.0 Hz, 6H); <sup>13</sup>C NMR (126 MHz, DMSO-*d*<sub>6</sub>) δ 149.80, 146.45, 143.08, 140.03, 139.41, 133.45, 132.16, 130.73, 126.01, 125.24, 122.01, 100.30, 44.89, 13.06; HRMS (ESI): Calcd. for C<sub>16</sub>H<sub>16</sub>Br<sub>2</sub>N<sub>3</sub> [M+H]<sup>+</sup>: 407.97055; found: 407.96982.

7,8-dichloro-*N*,3-dimethylphenazin-2-amine (C41)

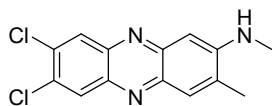

Orange solid, m.p.: 282.3 – 283.3 °C; <sup>1</sup>H NMR (500 MHz, DMSO-*d*<sub>6</sub>) δ 8.28 (s, 1H), 8.19 (s, 1H), 7.74 (s, 1H), 6.72 (q, *J* = 4.8 Hz, 1H), 6.67 (s, 1H), 2.94 (d, *J* = 5.0 Hz, 3H), 2.40 (s, 3H); <sup>13</sup>C NMR (126 MHz, DMSO-*d*<sub>6</sub>) δ 151.71, 146.18, 141.92, 140.78, 138.70, 136.80, 132.47, 130.02, 129.44, 128.82, 128.64, 97.55, 30.49, 18.81; HRMS (ESI): Calcd. for C<sub>14</sub>H<sub>12</sub>Cl<sub>2</sub>N<sub>3</sub> [M+H]<sup>+</sup>: 292.04028; found: 292.03967.

1-chloro-*N*,7,8-trimethylphenazin-2-amine (C42)

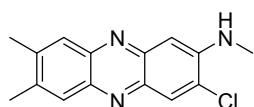

Orange solid, m.p.: 228 – 229 °C; <sup>1</sup>H NMR (400 MHz, CDCl<sub>3</sub>) δ 8.04 (s, 1H), 7.76 (d, *J* = 10.4 Hz, 2H), 6.95 (s, 1H), 5.00 (d, *J* = 5.0 Hz, 1H), 3.02 (d, *J* = 5.0 Hz, 3H), 2.46 (d, *J* = 4.6 Hz, 6H); <sup>13</sup>C NMR (101 MHz, CDCl<sub>3</sub>) δ 145.51, 144.15,

142.95, 141.48, 140.47, 139.11, 138.37, 128.53, 127.88, 127.08, 101.29, 30.46, 20.69, 20.42; HRMS (ESI): Calcd. for  $C_{15}H_{15}ClN_3$   $[M+H]^+$ : 272.09490; found: 272.09464.

*N,N*-diethyl-8-methylphenazin-2-amine (C43)

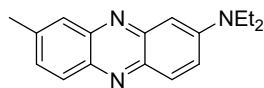

Red oil;  $^1H$  NMR (400 MHz,  $CDCl_3$ )  $\delta$  7.94 (d,  $J$  = 9.0 Hz, 2H), 7.75 (s, 1H), 7.44 - 7.38 (m, 2H), 6.96 (s, 1H), 3.50 (q,  $J$  = 7.0 Hz, 4H), 2.53 (s, 3H), 1.24 (t,  $J$  = 7.0 Hz, 6H);  $^{13}C$  NMR (101 MHz,  $CDCl_3$ )  $\delta$  148.79, 145.67, 143.75, 140.81, 139.31, 138.81, 130.28, 130.09, 128.86, 126.27, 122.13, 101.04, 44.89, 22.17, 12.74; HRMS (ESI): Calcd. for  $C_{17}H_{20}N_3$   $[M+H]^+$ : 266.16517; found: 266.16489.

2-chloro-8-(piperidin-1-yl)phenazine (C44)

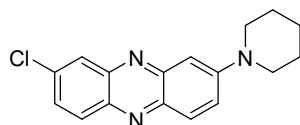

Orange solid, m.p.: 151-152 °C;  $^1H$  NMR (400 MHz,  $CDCl_3$ )  $\delta$  8.03 – 8.01 (m, 2H), 7.94 (d,  $J$  = 9.8 Hz, 1H), 7.64 (dd,  $J$  = 9.8, 2.8 Hz, 1H), 7.54 (dd,  $J$  = 9.2, 2.2 Hz, 1H), 7.16 (d,  $J$  = 2.8 Hz, 1H), 3.49 – 3.46 (m, 4H), 1.75 - 1.69 (m, 6H);  $^{13}C$  NMR (101 MHz,  $CDCl_3$ )  $\delta$  152.50, 145.99, 143.75, 140.16, 139.63, 135.92, 130.75, 130.03, 129.00, 127.02, 125.45, 105.55, 49.29, 25.46, 24.36; HRMS (ESI): Calcd. for  $C_{17}H_{17}ClN_3$   $[M+H]^+$ : 298.11055; found: 298.11014.

*N,N*-diethyl-8-fluorophenazin-2-amine (C45)

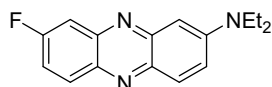

Orange solid, m.p.: 126 – 127 °C;  $^1H$  NMR (500 MHz,  $DMSO-d_6$ )  $\delta$  8.12 (dd,  $J$  = 5.0, 10.0 Hz, 1H), 7.96 (d,  $J$  = 10.0 Hz, 1H), 7.71 (d,  $J$  = 10.0 Hz, 1H), 7.66 (d,  $J$  = 10.0 Hz, 1H), 7.58 (t,  $J$  = 7.6 Hz, 1H), 6.88 (s, 1H), 3.58 (q,  $J$  = 6.8 Hz, 4H), 1.22 (t,  $J$  = 7.0 Hz, 6H);  $^{13}C$  NMR (126 MHz,  $DMSO-d_6$ )  $\delta$  162.94 (d,  $J$  = 250.8 Hz) , 149.53, 146.20, 144.37 (d,  $J$  = 12.6 Hz), 138.87, 137.82, 132.39 (d,  $J$  = 10.2 Hz), 130.78, 123.82, 118.60 (d,  $J$  = 27.8 Hz), 110.61 (d,  $J$  = 20.2 Hz), 100.34, 44.79, 13.04;  $^{19}F$  NMR (471 MHz,  $CDCl_3$ )  $\delta$  -107.63. HRMS (ESI): Calcd. for  $C_{16}H_{17}FN_3$   $[M+H]^+$ : 270.14010; found: 270.13977.

8-chloro-*N,N*-diethylphenazin-2-amine (C46)

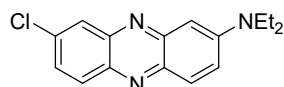

Orange solid, m.p.: 127-128 °C;  $^1H$  NMR (400 MHz,  $CDCl_3$ )  $\delta$  7.91 (dd,  $J$  = 5.8, 3.4 Hz, 2H), 7.86 (d,  $J$  = 9.8 Hz, 1H), 7.43 (t,  $J$  = 2.6 Hz, 1H), 7.40 (t,  $J$  = 4.0 Hz, 1H), 6.86 (d,  $J$  = 2.8 Hz, 1H), 3.47 (q,  $J$  = 7.2 Hz, 4H), 1.22 (t,  $J$  = 7.2 Hz, 6H);  $^{13}C$  NMR (101 MHz,  $CDCl_3$ )  $\delta$  149.19, 146.03, 143.73, 139.37, 138.84, 135.84, 130.65, 130.46, 128.11, 126.53, 122.87, 100.77, 44.95, 12.74; HRMS (ESI): Calcd. for  $C_{16}H_{17}ClN_3$   $[M+H]^+$ : 286.11055; found: 286.11002.

8-bromo-*N,N*-diethylphenazin-2-amine (C47)

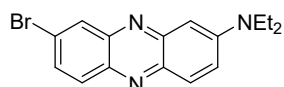

Orange solid, m.p.: 113.8-114.8 °C;  $^1H$  NMR (400 MHz,  $CDCl_3$ )  $\delta$  8.19 (s, 1H), 7.93 (t,  $J$  = 9.0 Hz, 2H), 7.61 (d,  $J$  = 10.8 Hz, 1H), 7.50 (d,  $J$  = 12.2 Hz, 1H), 6.95 (s, 1H), 3.55 (q,  $J$  = 7.2 Hz, 4H), 1.29 (t,  $J$  = 7.2 Hz, 6H);  $^{13}C$  NMR (101 MHz,

CDCl<sub>3</sub>) δ 149.23, 146.10, 144.19, 139.50, 139.09, 130.72, 130.58, 130.52, 130.16, 124.33, 123.03, 100.91, 45.00, 12.78;  
HRMS (ESI): Calcd. for C<sub>16</sub>H<sub>17</sub>BrN<sub>3</sub> [M+H]<sup>+</sup>: 330.06003; found: 330.05939.

*N,N*-diethyl-8-methoxyphenazin-2-amine (**C48**)

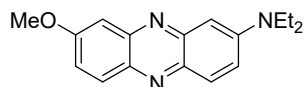

Orange solid, m.p.: 89.9 – 90.9 °C; <sup>1</sup>H NMR (500 MHz, DMSO-*d*<sub>6</sub>) δ 7.93 (dd, *J* = 9.4, 4.6 Hz, 2H), 7.61 (dd, *J* = 9.6, 3.0 Hz, 1H), 7.33 (dd, *J* = 9.4, 2.8 Hz, 1H), 7.27 (d, *J* = 2.8 Hz, 1H), 6.88 (s, 1H), 3.96 (s, 3H), 3.57 (q, *J* = 7.0 Hz, 4H), 1.22 (t, *J* = 7.0 Hz, 6H); <sup>13</sup>C NMR (126 MHz, DMSO-*d*<sub>6</sub>) δ 161.02, 149.10, 145.89, 145.48, 137.34, 137.23, 130.88, 130.59, 122.36, 122.09, 104.71, 100.94, 56.19, 44.71, 13.06; HRMS (ESI): Calcd. for C<sub>17</sub>H<sub>20</sub>N<sub>3</sub>O [M+H]<sup>+</sup>: 282.16009; found: 282.15991.

*N,N*-diethyl-7-(trifluoromethyl)phenazin-2-amine (**C49**)

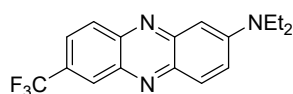

Orange solid, m.p.: 120.7 -121.7 °C; <sup>1</sup>H NMR (500 MHz, CDCl<sub>3</sub>) δ 8.40 (s, 1H), 8.09 (d, *J* = 9.0 Hz, 1H), 7.99 (d, *J* = 9.8 Hz, 1H), 7.81 (d, *J* = 8.8 Hz, 1H), 7.54 (d, *J* = 9.6 Hz, 1H), 6.99 (s, 1H), 3.57 (q, *J* = 7.0 Hz, 4H), 1.31 (t, *J* = 7.0 Hz, 6H); <sup>13</sup>C NMR (101 MHz, CDCl<sub>3</sub>) δ 149.61, 146.93, 144.60, 140.42, 138.97, 130.79, 129.43, 128.20 (d, *J* = 32.8 Hz), 127.82 (d, *J* = 4.6 Hz), 125.19 (d, *J* = 3.2 Hz), 124.06 (d, *J* = 272.2 Hz), 123.54, 100.82, 45.08, 12.75; <sup>19</sup>F NMR (471 MHz, CDCl<sub>3</sub>) δ -62.61; HRMS (ESI): Calcd. for C<sub>17</sub>H<sub>17</sub>F<sub>3</sub>N<sub>3</sub> [M+H]<sup>+</sup>: 320.13691; found: 320.13669.

*N,N*-diethyl-8-(trifluoromethyl)phenazin-2-amine (**C49'**)

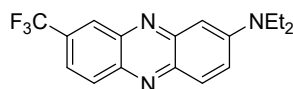

Orange solid, m.p.: 111.1 - 112.1 °C; <sup>1</sup>H NMR (500 MHz, CDCl<sub>3</sub>) δ 8.36 (s, 1H), 8.21 (d, *J* = 9.0 Hz, 1H), 8.03 (d, *J* = 9.8 Hz, 1H), 7.73 (d, *J* = 9.0 Hz, 1H), 7.61 (d, *J* = 10.6 Hz, 1H), 7.03 (s, 1H), 3.60 (q, *J* = 7.0 Hz, 4H), 1.33 (t, *J* = 7.0 Hz, 6H);

<sup>13</sup>C NMR (101 MHz, CDCl<sub>3</sub>) δ 149.30, 146.71, 142.66, 141.10, 140.69, 130.86, 130.62, 126.47 (d, *J* = 5.0 Hz), 124.10, 122.84 – 121.77 (m), 100.93, 45.08, 12.77; <sup>19</sup>F NMR (471 MHz, CDCl<sub>3</sub>) δ -63.04; HRMS (ESI): Calcd. for C<sub>17</sub>H<sub>17</sub>F<sub>3</sub>N<sub>3</sub> [M+H]<sup>+</sup>: 320.13691; found: 320.13638.

7-(diethylamino)phenazine-2-carbonitrile (**C50**)

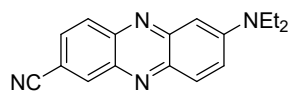

Red solid, m.p.: 183 - 184 °C; <sup>1</sup>H NMR (400 MHz, CDCl<sub>3</sub>) δ 8.40 (s, 1H), 7.96 (dd, *J* = 17.0, 9.4 Hz, 2H), 7.71 (d, *J* = 8.6 Hz, 1H), 7.55 (d, *J* = 9.8 Hz, 1H), 6.93 (s, 1H), 3.56 (q, *J* = 7.2 Hz, 4H), 1.29 (t, *J* = 7.2 Hz, 6H); <sup>13</sup>C NMR (101 MHz, CDCl<sub>3</sub>) δ 150.12, 147.05, 144.89, 140.87, 138.90, 136.16, 131.08, 129.71, 129.59, 124.00, 118.90, 109.37, 100.61, 45.21, 12.77; HRMS (ESI): Calcd. for C<sub>17</sub>H<sub>17</sub>N<sub>4</sub> [M+H]<sup>+</sup>: 277.14477; found: 277.14462.

8-(diethylamino)phenazine-2-carbonitrile (**C50'**)

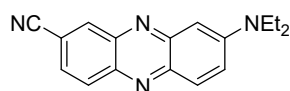

Red solid, m.p.: 125 - 126 °C;  $^1\text{H}$  NMR (500 MHz,  $\text{DMSO-}d_6$ )  $\delta$  8.56 (d,  $J = 1.8$  Hz, 1H), 8.20 (d,  $J = 8.8$  Hz, 1H), 8.02 (d,  $J = 9.8$  Hz, 1H), 7.89 – 7.88 (m, 1H), 7.87 (d,  $J = 2.2$  Hz, 1H), 6.94 (d,  $J = 2.8$  Hz, 1H), 3.62 (q,  $J = 7.0$  Hz, 4H), 1.24 (t,  $J = 10.0$  Hz, 6H);  $^{13}\text{C}$  NMR (126 MHz,  $\text{DMSO-}d_6$ )  $\delta$  149.82, 146.87, 142.64, 141.13, 140.83, 135.11, 131.46, 130.76, 127.05, 126.16, 119.10, 112.70, 100.13, 44.91, 13.04; HRMS (ESI): Calcd. for  $\text{C}_{17}\text{H}_{17}\text{N}_4$   $[\text{M}+\text{H}]^+$ : 277.14477; found: 277.14456.

## Reference

- (1) Westerhaus FA, Jagadeesh RV, Wienhoefer G, Pohl MM, Radnik J, Surkus AE, Rabeah J, Junge K, Junge H, Nielsen M, Brueckner A, Beller M. *Nat Chem*, 2013, 5: 537–543; (b) Tang C, Surkus AE, Chen F, Pohl MM, Agostini G, Schneider M, Junge H, Beller M. *Angew Chem Int Ed*, 2017, 56: 16616–16620
- (2) Murakami M, Ohkubo K, Fukuzumi S. *Chem Eur J*, 2010, 16: 7820–7832

## NMR spectra of the obtained compounds

$^1\text{H}$ -NMR (500 MHz,  $\text{DMSO-}d_6$ ) spectrum of **C1**

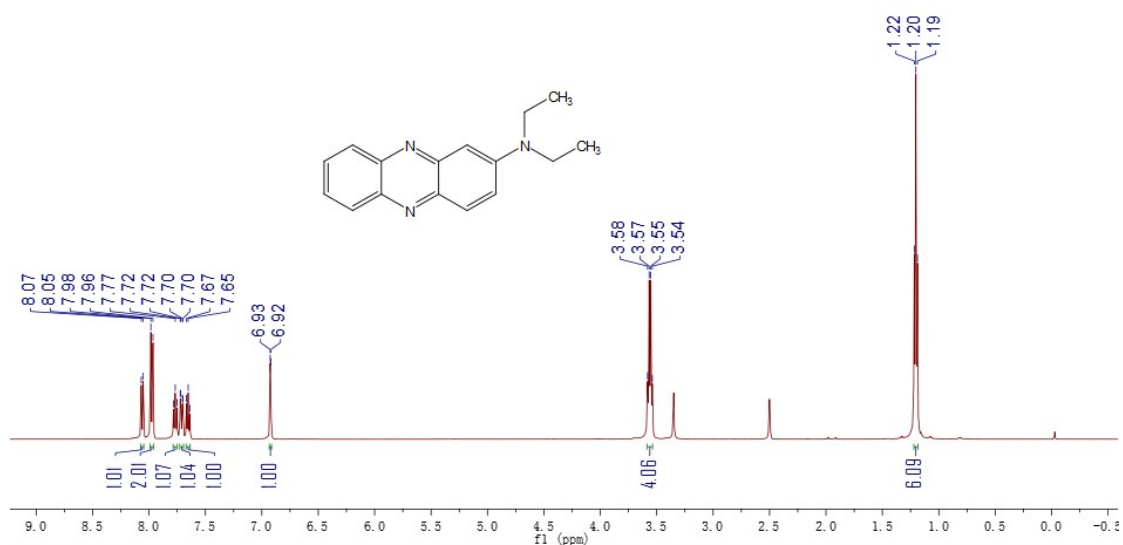

$^{13}\text{C}$ -NMR (126 MHz,  $\text{DMSO-}d_6$ ) spectrum of **C1**

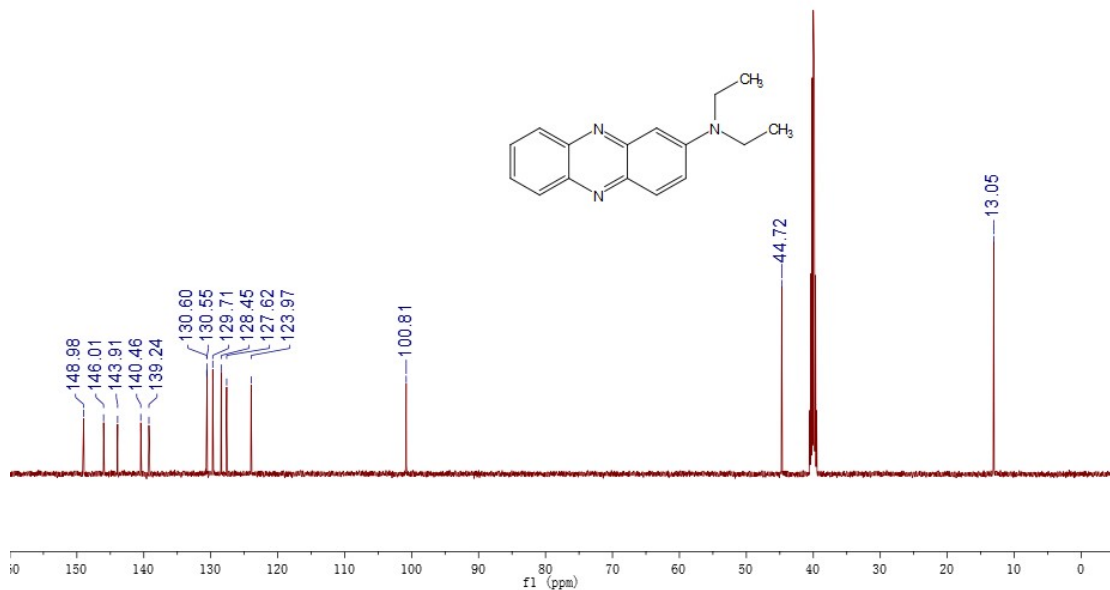

$^{13}\text{C}$ -NMR (500 MHz,  $\text{DMSO-}d_6$ ) spectrum of C2

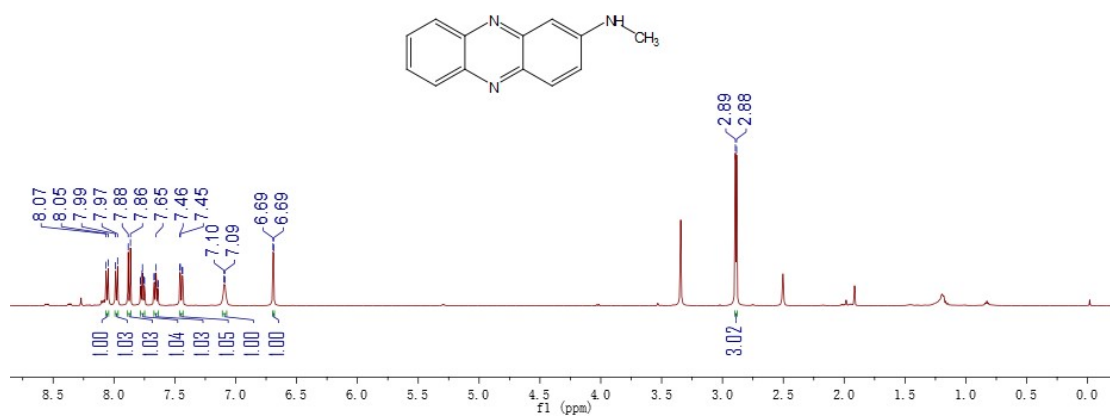

$^1\text{H}$ -NMR (126 MHz,  $\text{DMSO-}d_6$ ) spectrum of C2

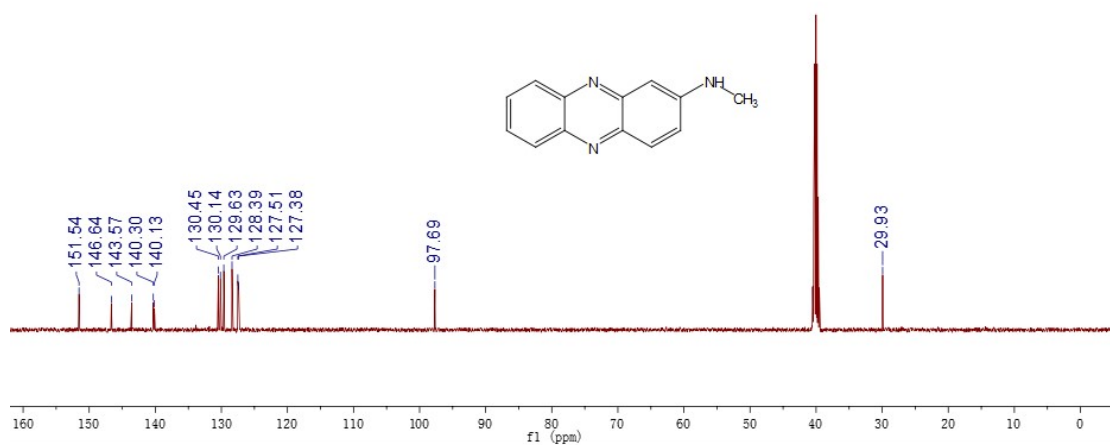

<sup>1</sup>H-NMR (500 MHz, DMSO-*d*<sub>6</sub>) spectrum of C3

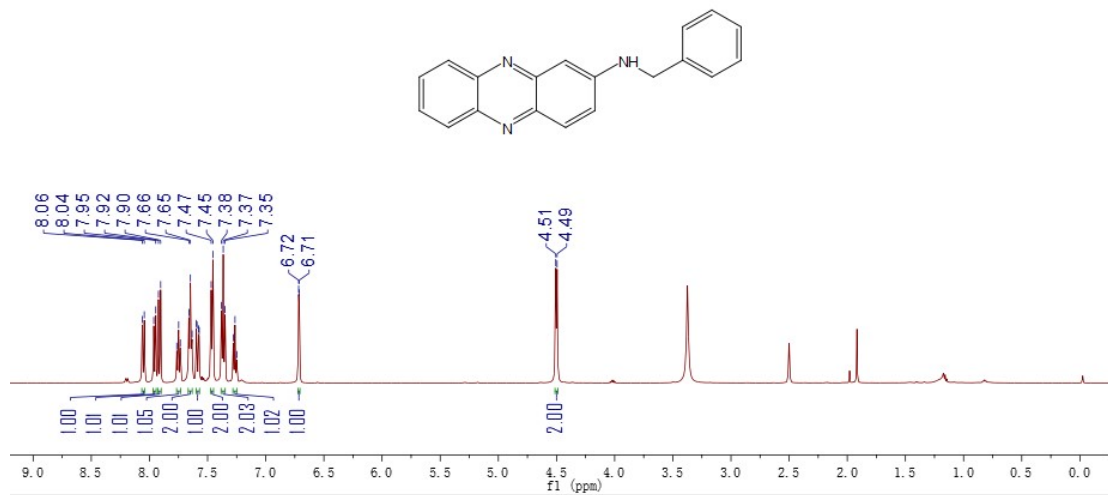

<sup>13</sup>C-NMR (126 MHz, DMSO-*d*<sub>6</sub>) spectrum of C3

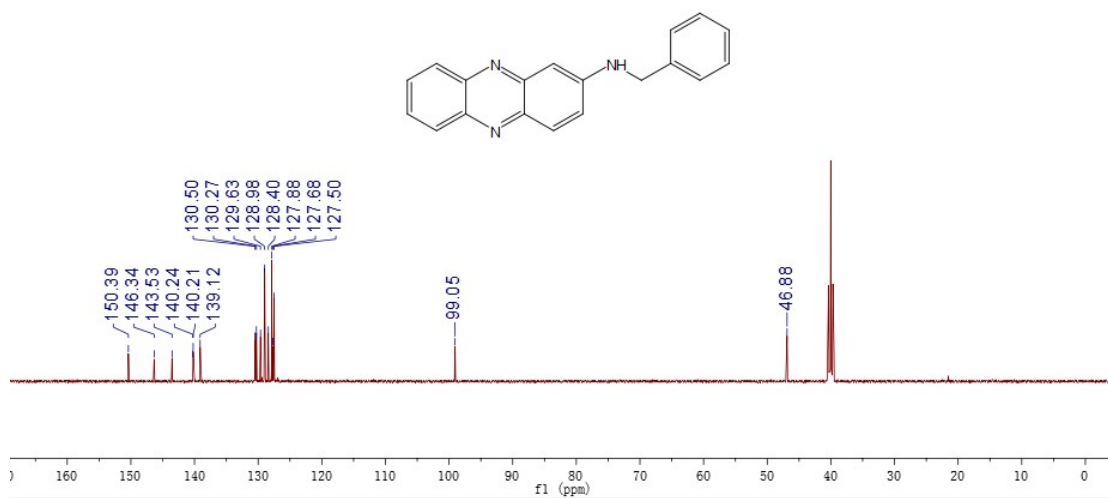

<sup>1</sup>H-NMR (500 MHz, DMSO-*d*<sub>6</sub>) spectrum of C4

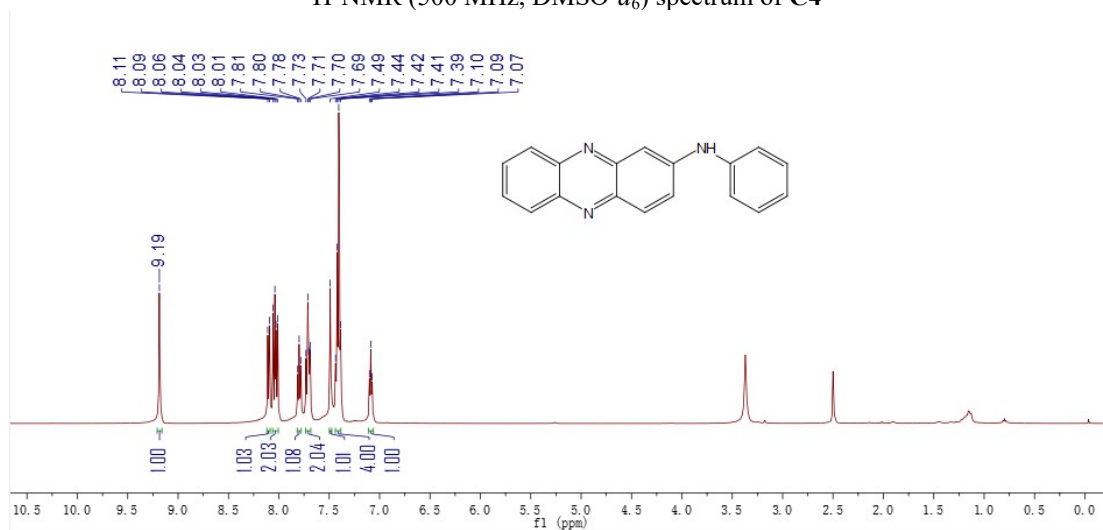

<sup>13</sup>C-NMR (126 MHz, DMSO-*d*<sub>6</sub>) spectrum of C4

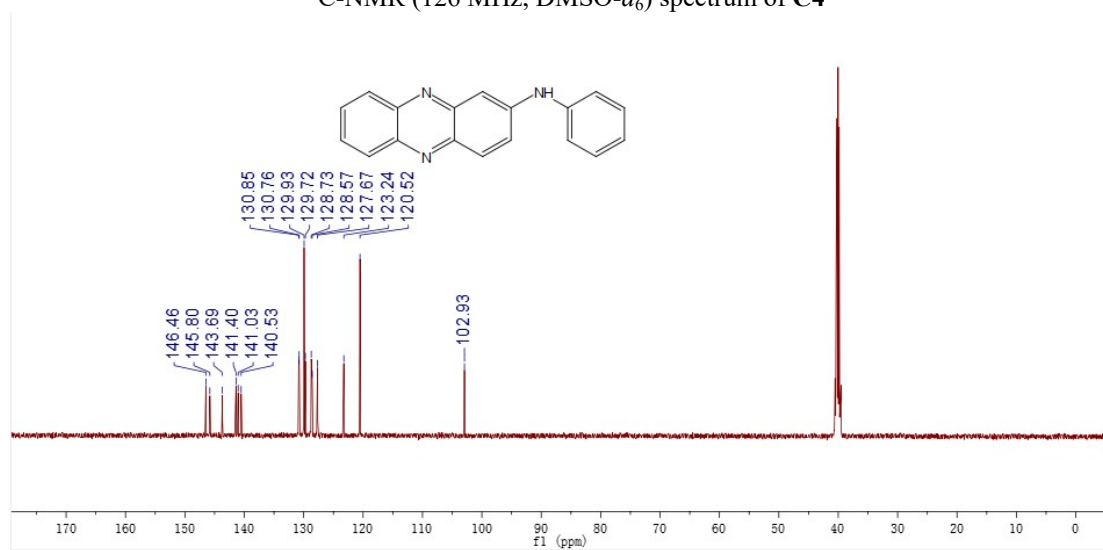



<sup>1</sup>H-NMR (500 MHz, DMSO-*d*<sub>6</sub>) spectrum of C5

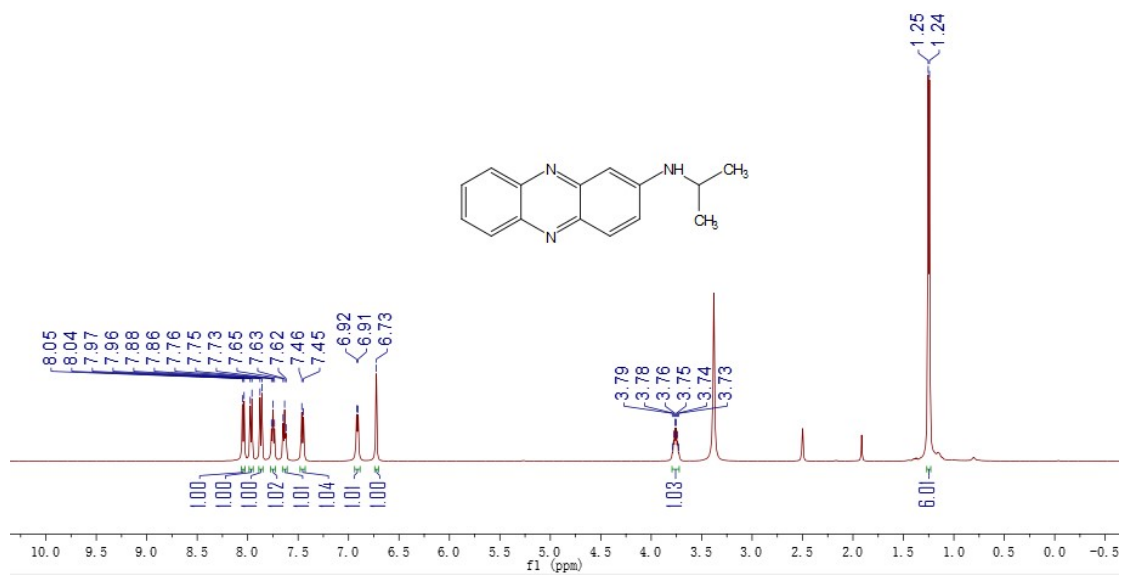

<sup>13</sup>C-NMR (126 MHz, DMSO-*d*<sub>6</sub>) spectrum of C5

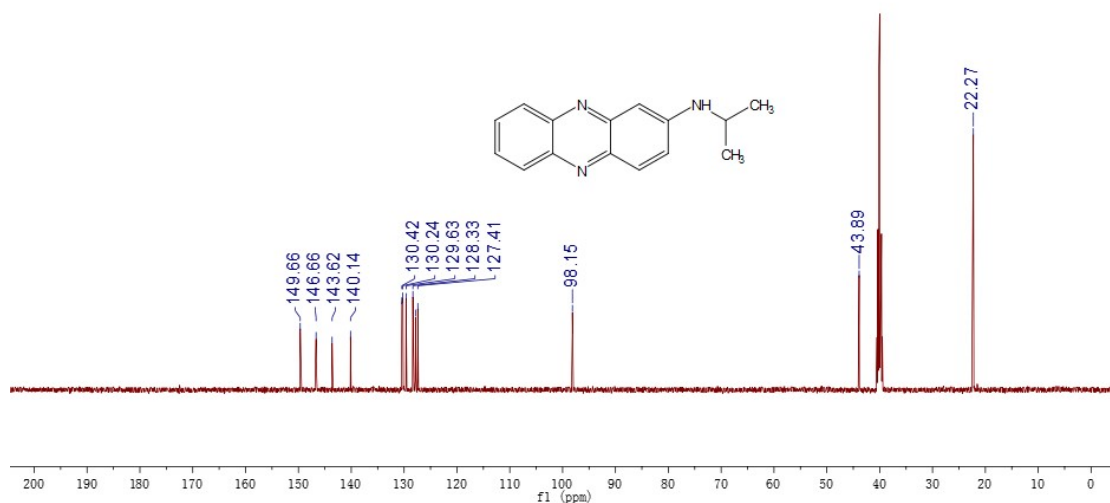

$^1\text{H-NMR}$  (500 MHz,  $\text{DMSO-}d_6$ ) spectrum of C6

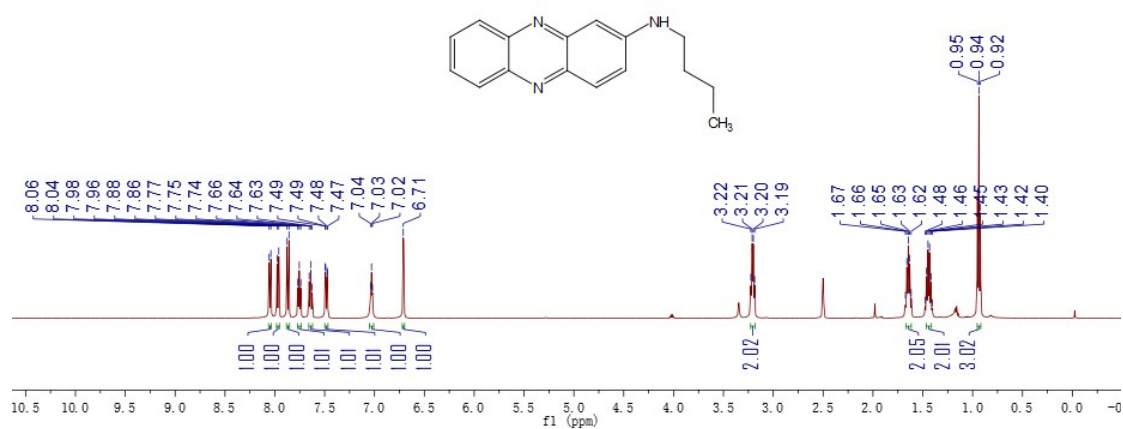

$^{13}\text{C-NMR}$  (126 MHz,  $\text{DMSO-}d_6$ ) spectrum of C6

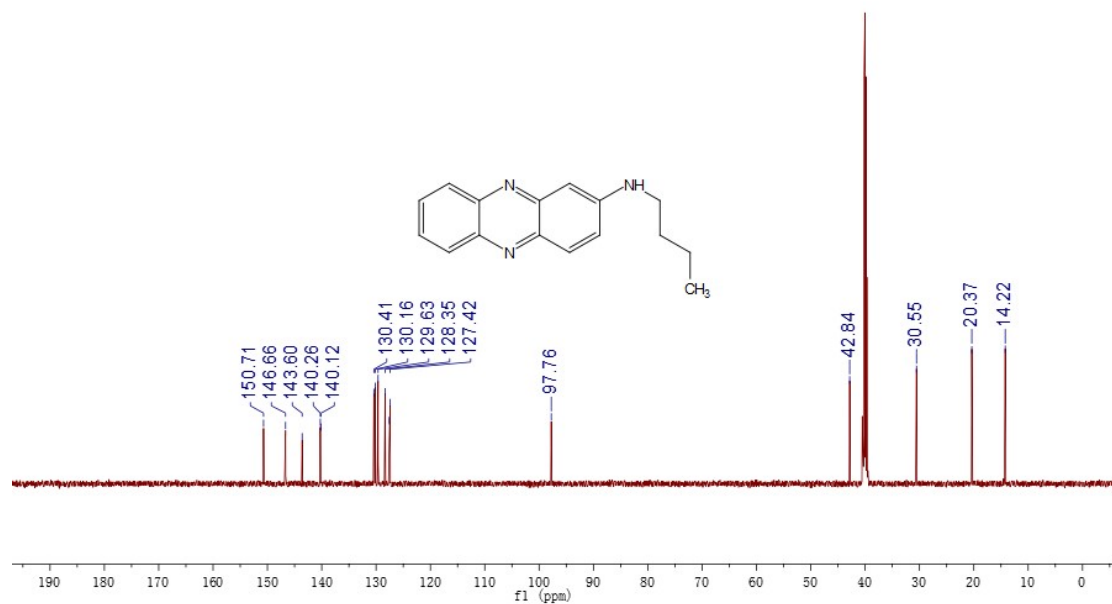

<sup>1</sup>H-NMR (500 MHz, DMSO-*d*<sub>6</sub>) spectrum of C7

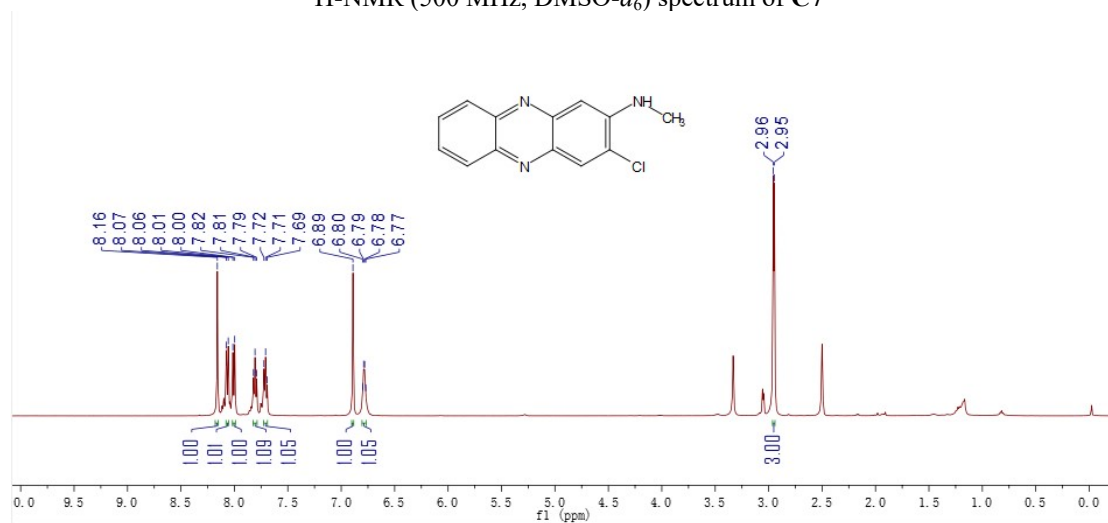

<sup>13</sup>C-NMR (126 MHz, DMSO-*d*<sub>6</sub>) spectrum of C7

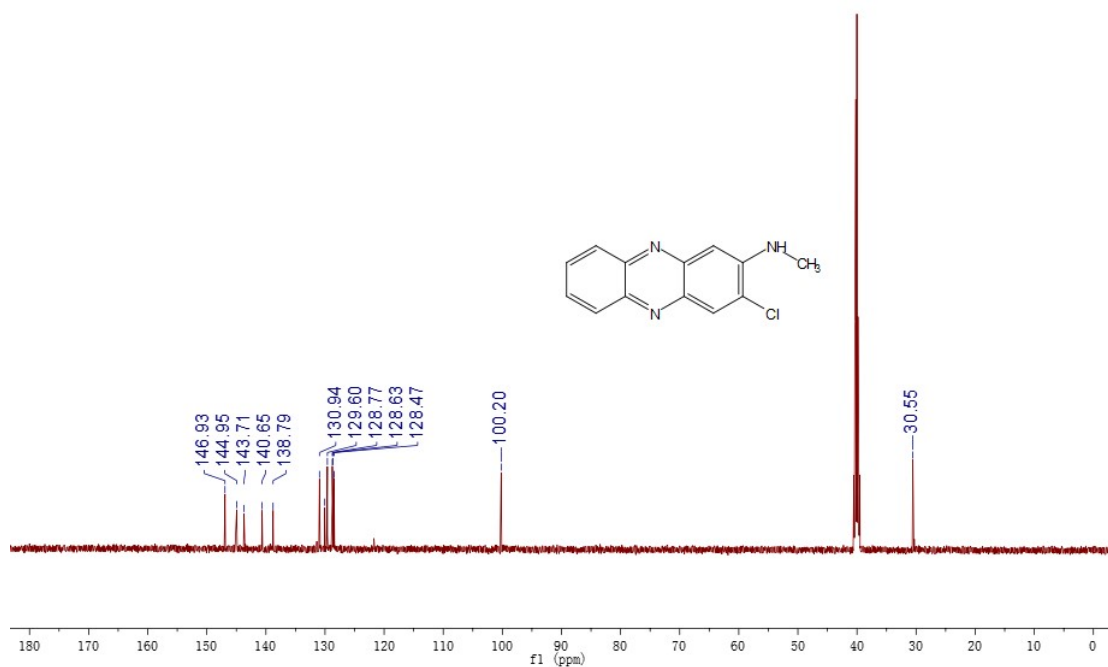

<sup>1</sup>H-NMR (500 MHz, DMSO-*d*<sub>6</sub>) spectrum of **C8**

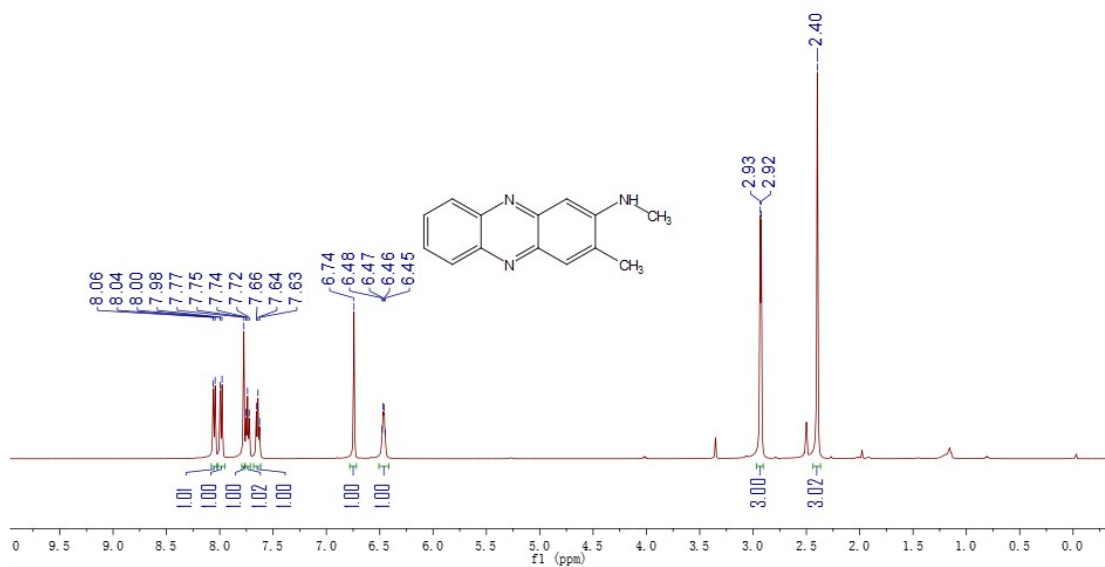

<sup>13</sup>C-NMR (126 MHz, DMSO-*d*<sub>6</sub>) spectrum of **C8**

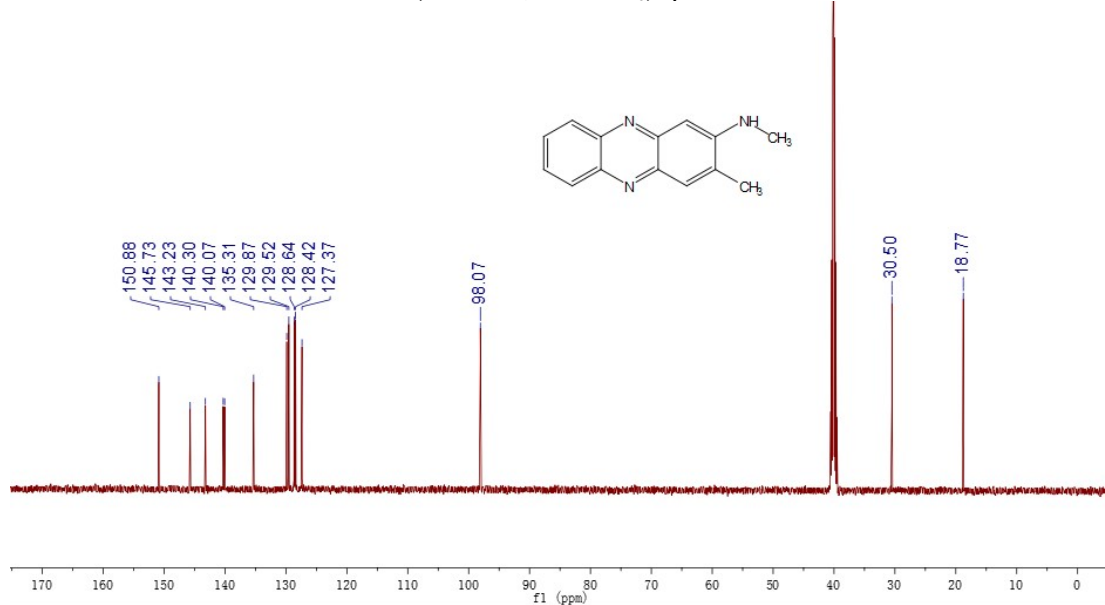

<sup>1</sup>H-NMR (500 MHz, DMSO-*d*<sub>6</sub>) spectrum of C9

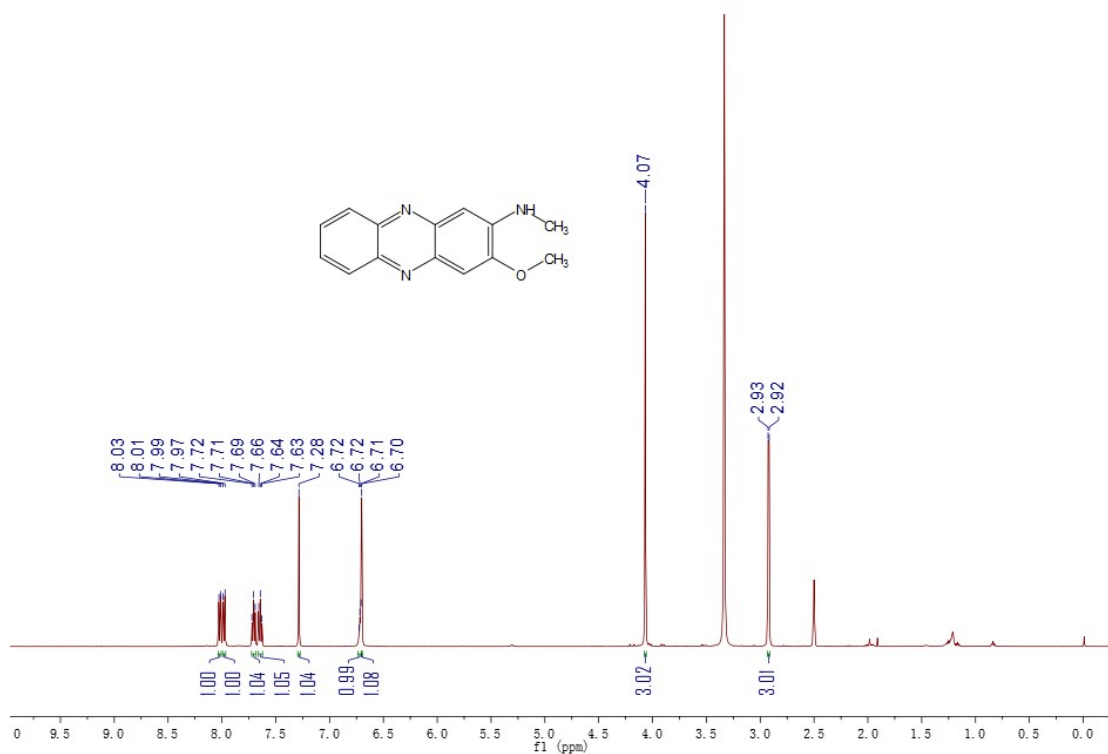

<sup>13</sup>C-NMR (126 MHz, DMSO-*d*<sub>6</sub>) spectrum of C9

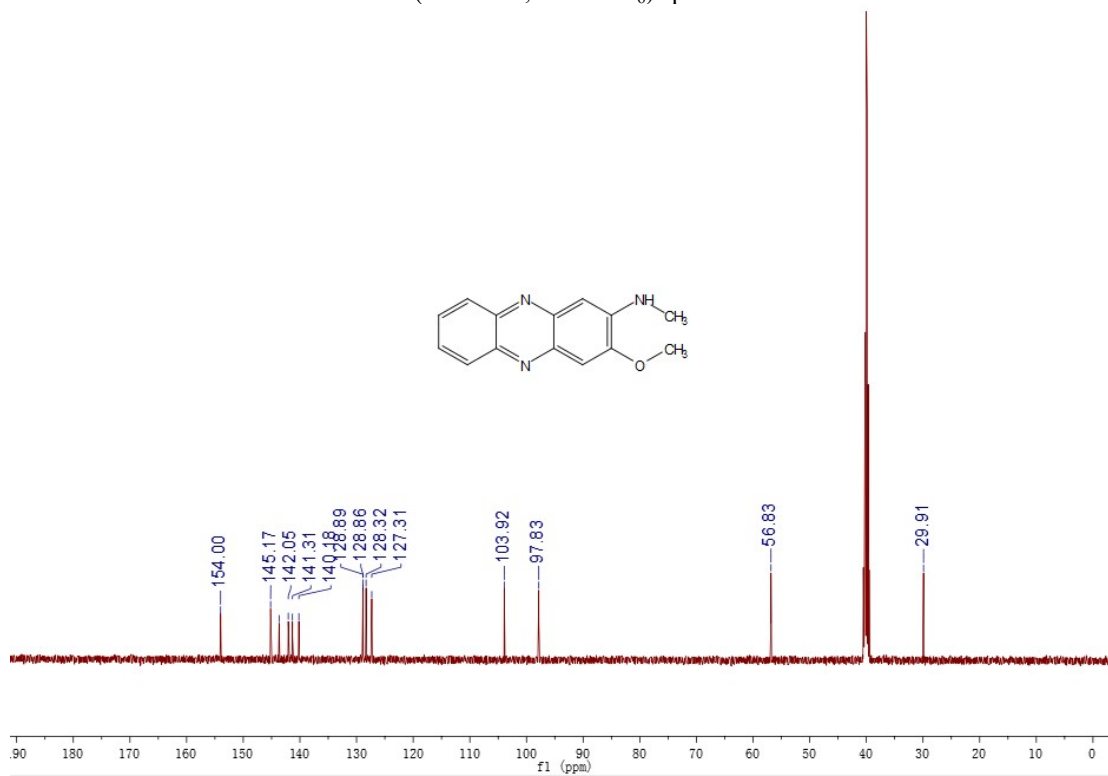

<sup>1</sup>H-NMR (500 MHz, DMSO-*d*<sub>6</sub>) spectrum of C10

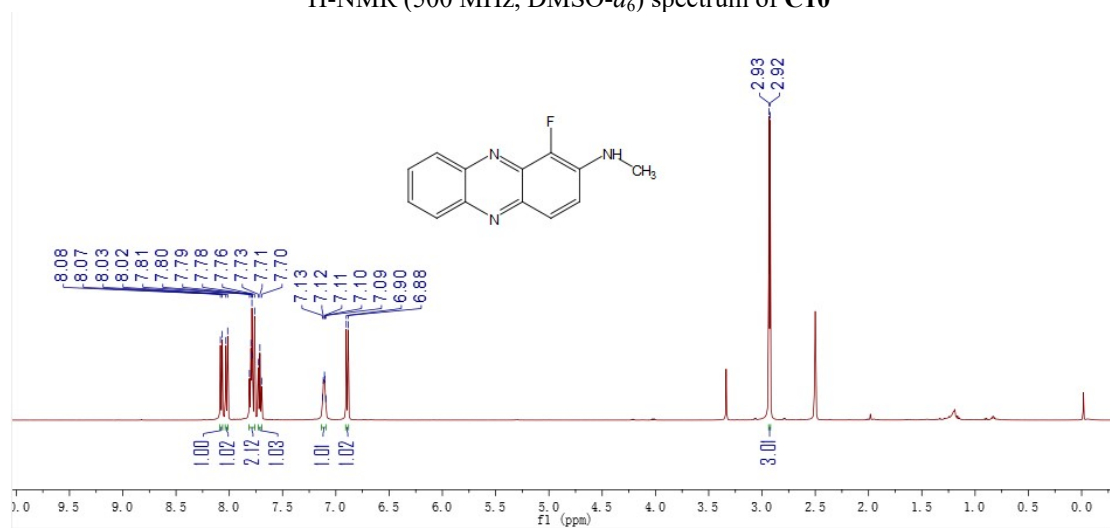

<sup>13</sup>C-NMR (126 MHz, DMSO-*d*<sub>6</sub>) spectrum of C10

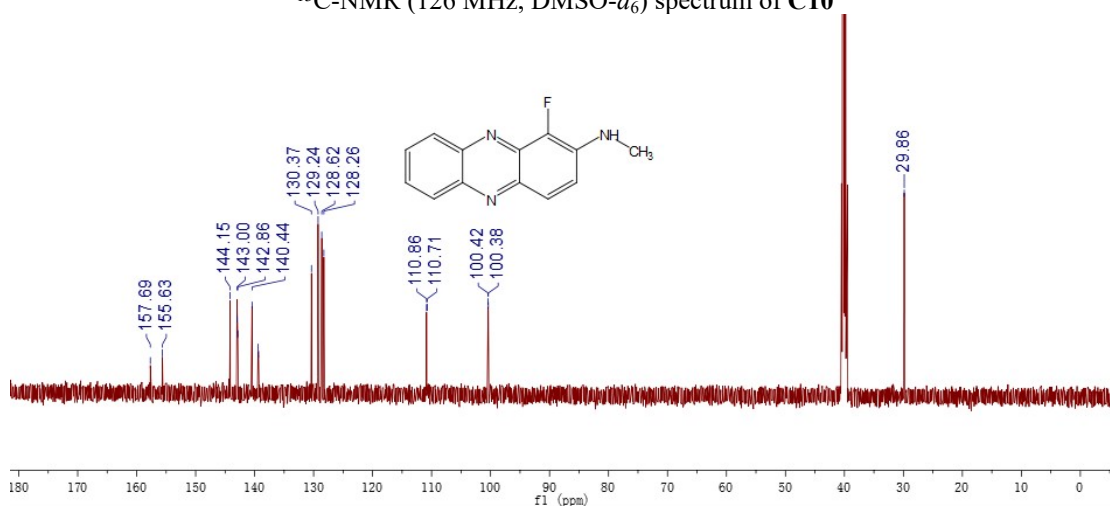

<sup>19</sup>F-NMR (471 MHz, DMSO-*d*<sub>6</sub>) spectrum of C10

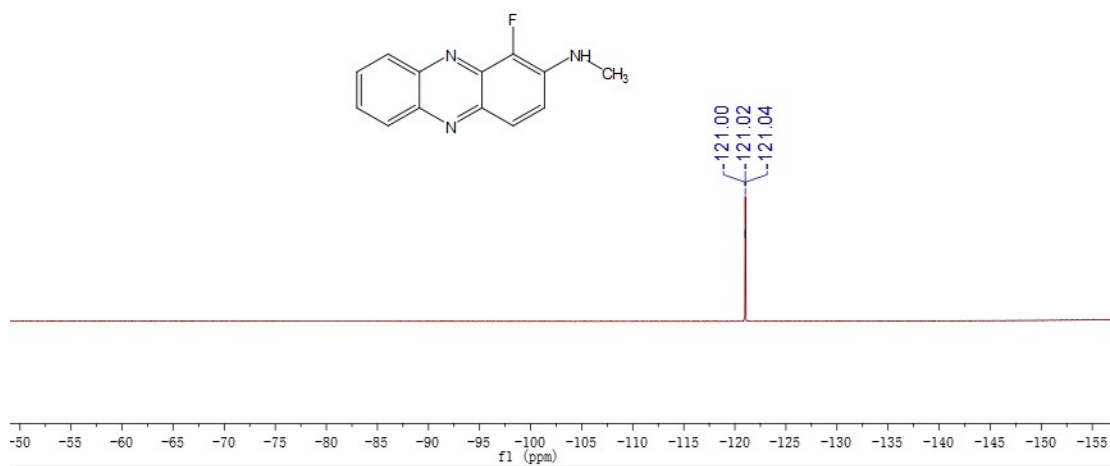

<sup>1</sup>H-NMR (400 MHz, CDCl<sub>3</sub>) spectrum of **C11**

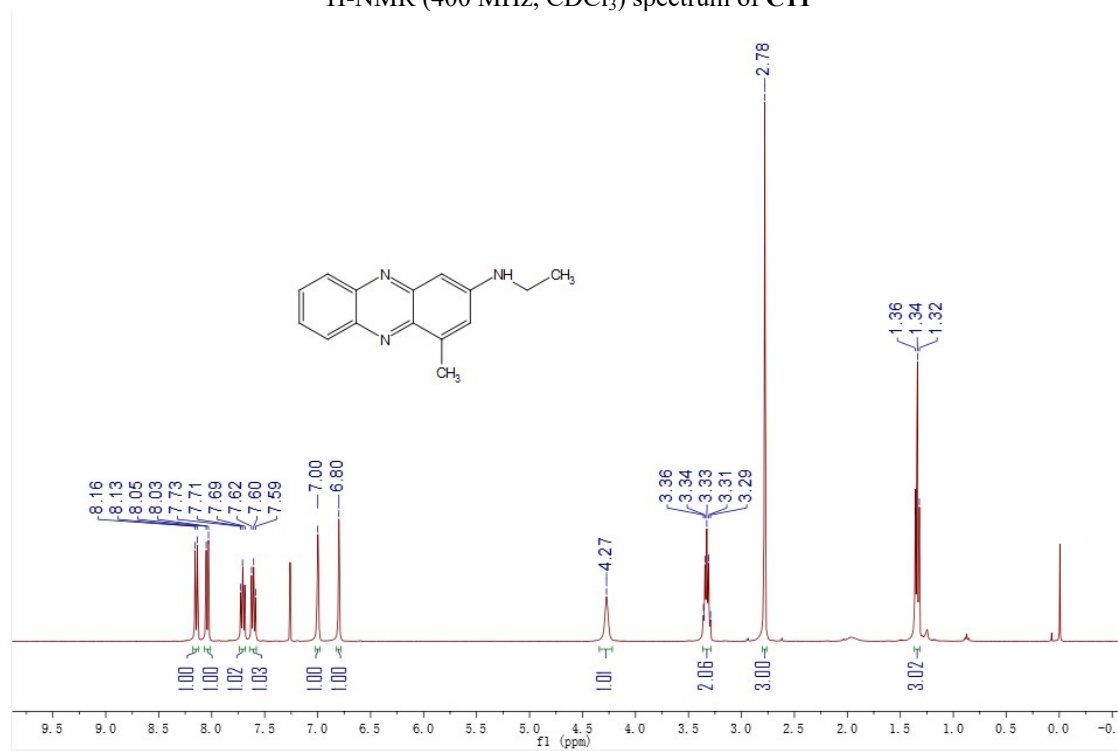

<sup>13</sup>C-NMR (101 MHz, CDCl<sub>3</sub>) spectrum of **C11**

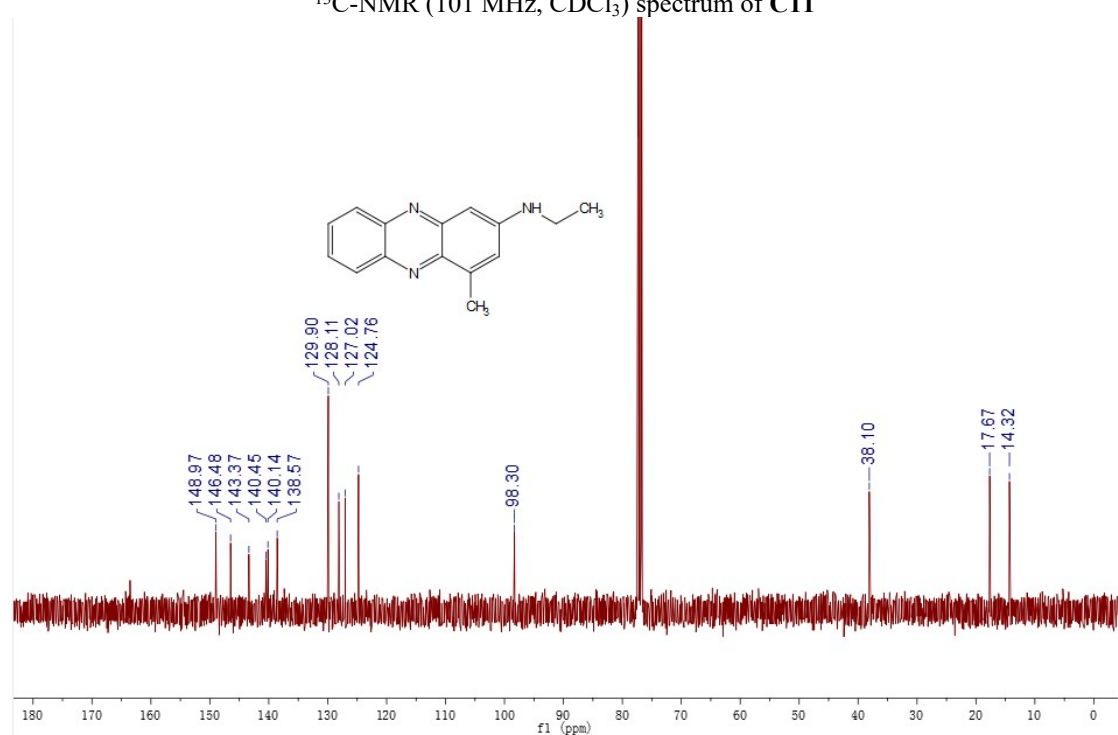

<sup>1</sup>H-NMR (500 MHz, CDCl<sub>3</sub>) spectrum of C12

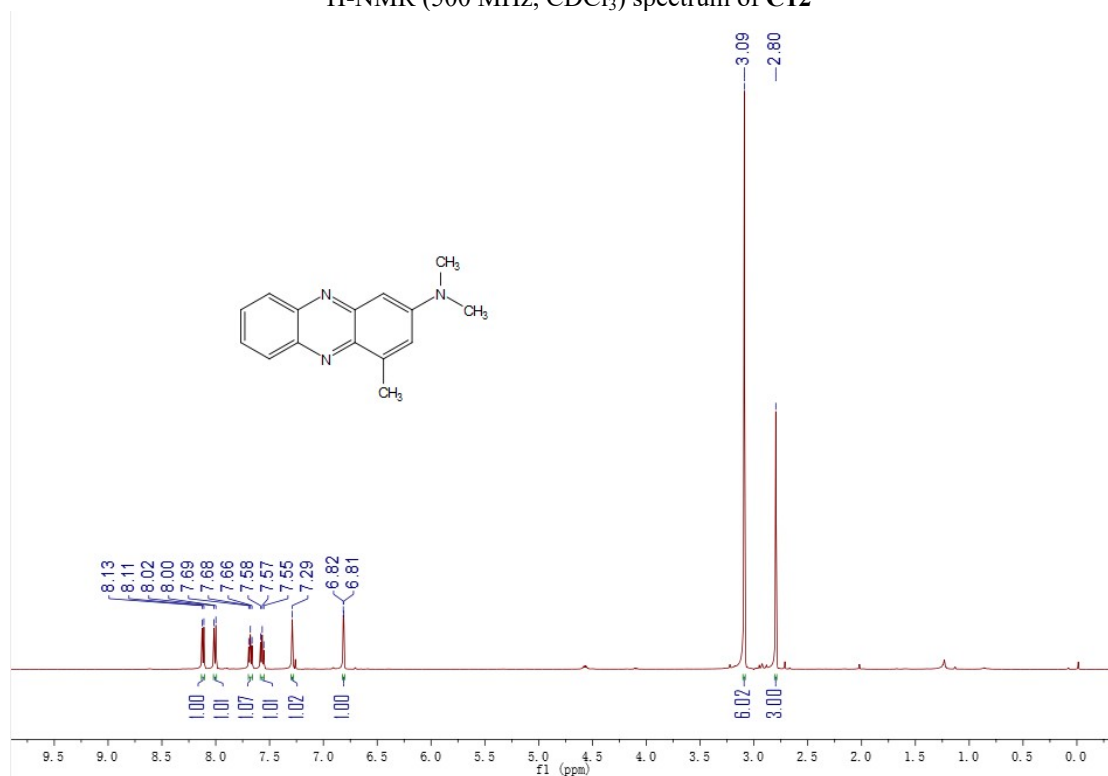

<sup>13</sup>C-NMR (126 MHz, CDCl<sub>3</sub>) spectrum of C12

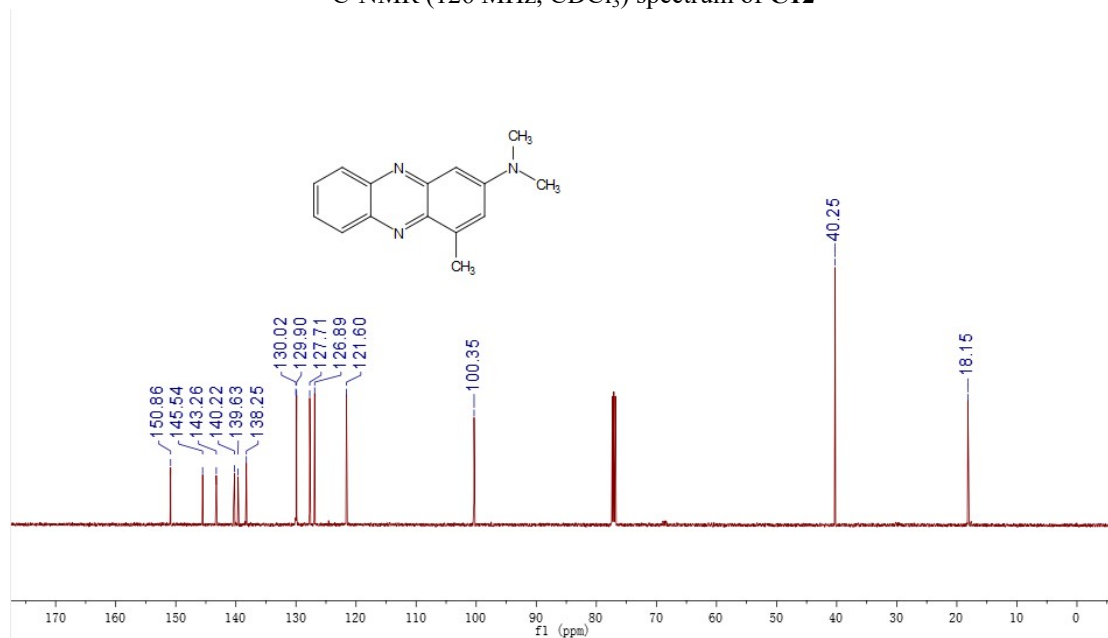



<sup>1</sup>H-NMR (500 MHz, DMSO-*d*<sub>6</sub>) spectrum of C13

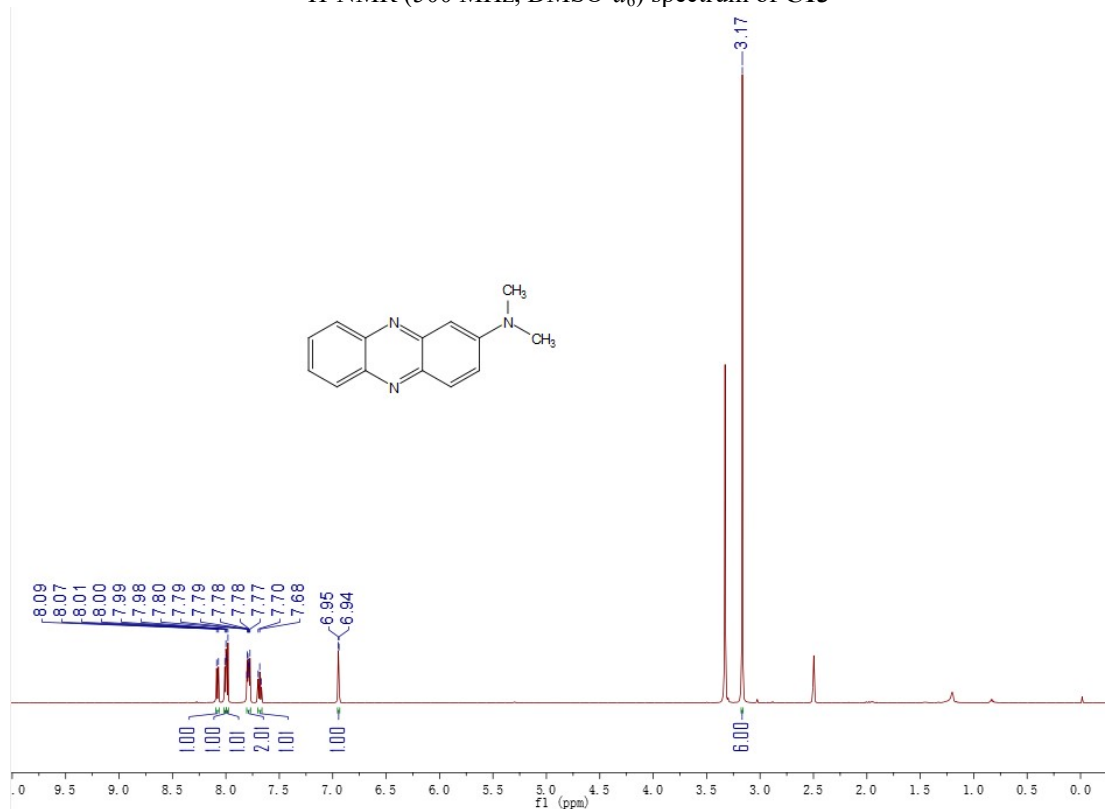

<sup>13</sup>C-NMR (126 MHz, DMSO-*d*<sub>6</sub>) spectrum of C13

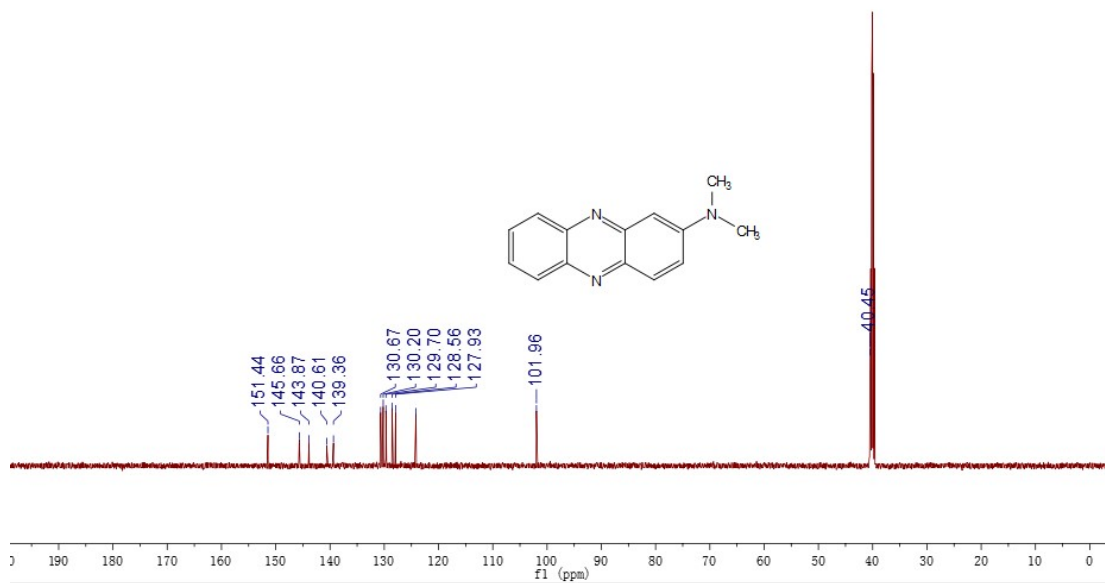

<sup>1</sup>H-NMR (500 MHz, CDCl<sub>3</sub>) spectrum of C14

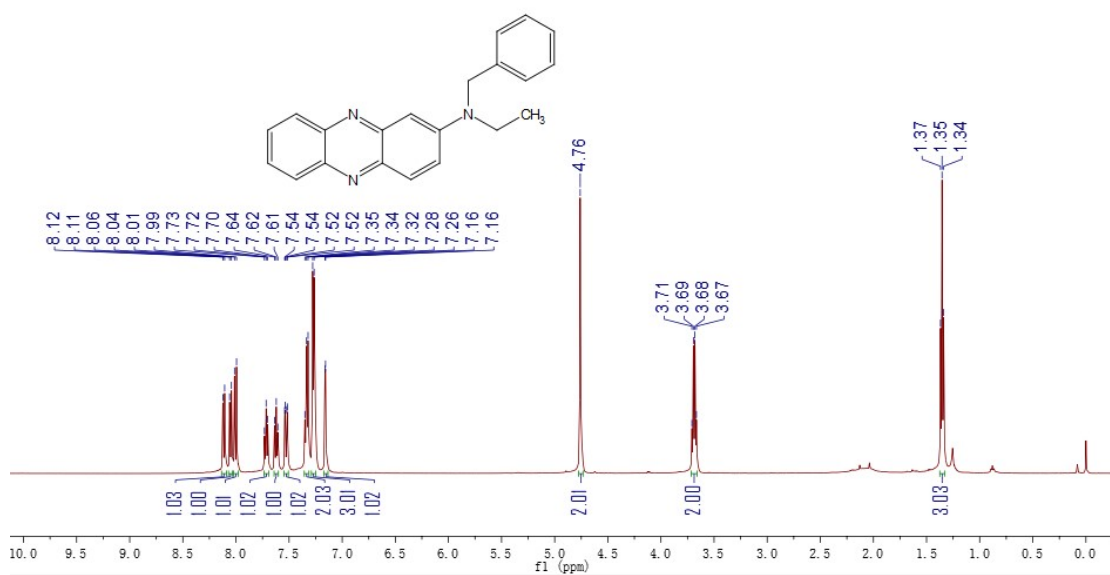

<sup>13</sup>C-NMR (126 MHz, CDCl<sub>3</sub>) spectrum of C14

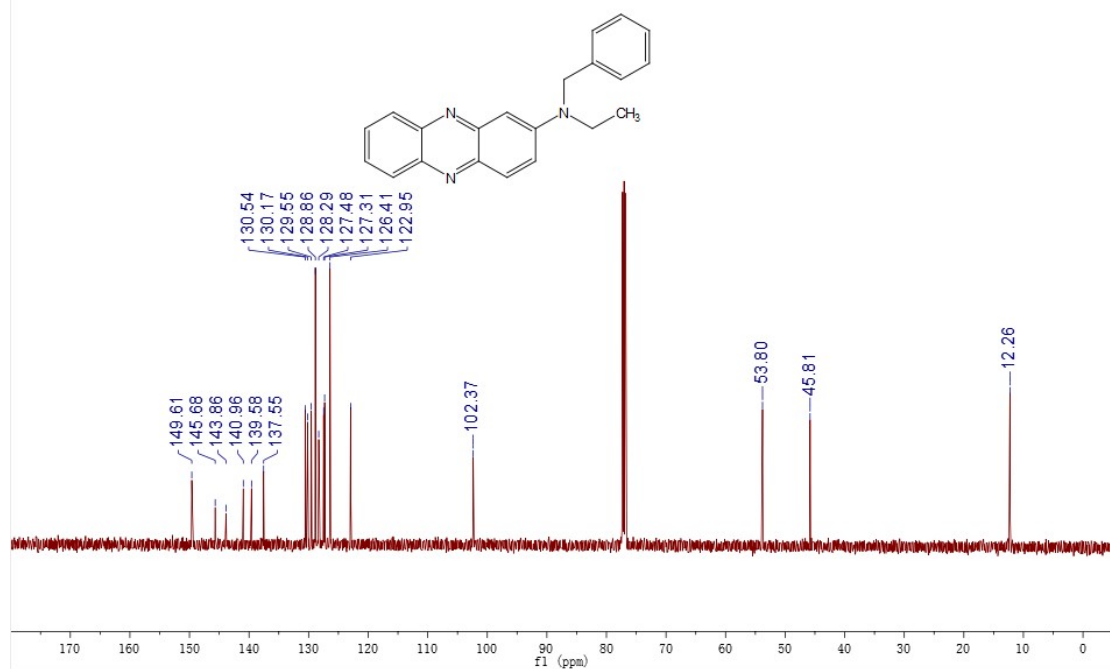

<sup>1</sup>H-NMR (500 MHz, DMSO-*d*<sub>6</sub>) spectrum of C15

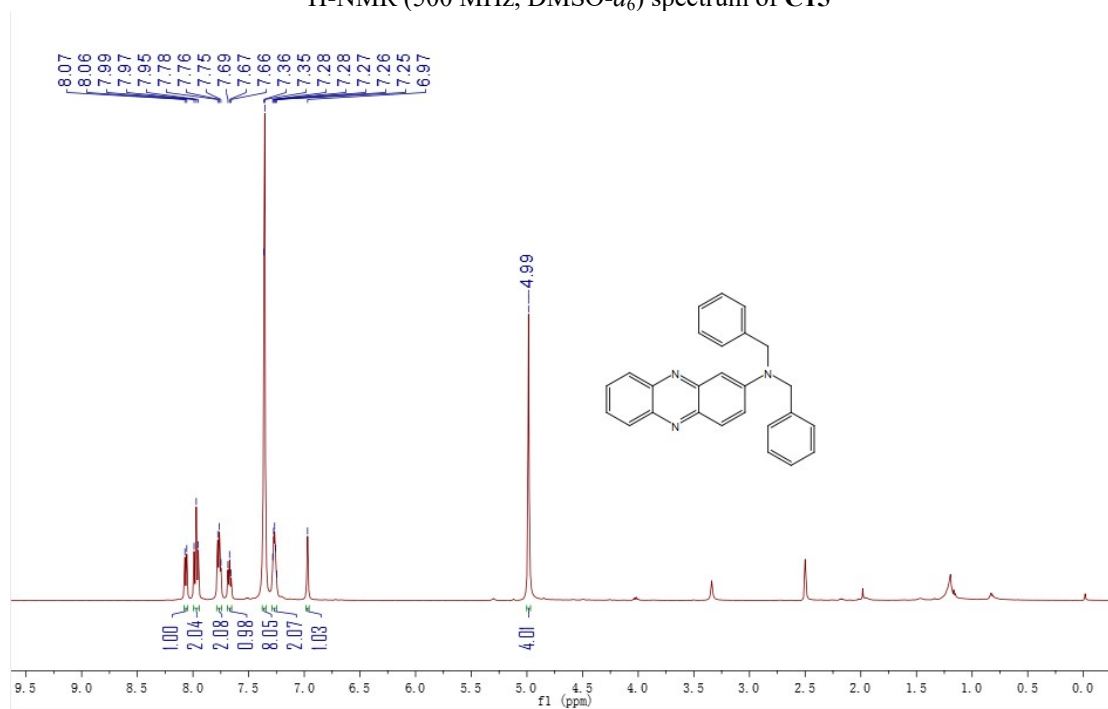

<sup>13</sup>C-NMR (126 MHz, DMSO-*d*<sub>6</sub>) spectrum of C15

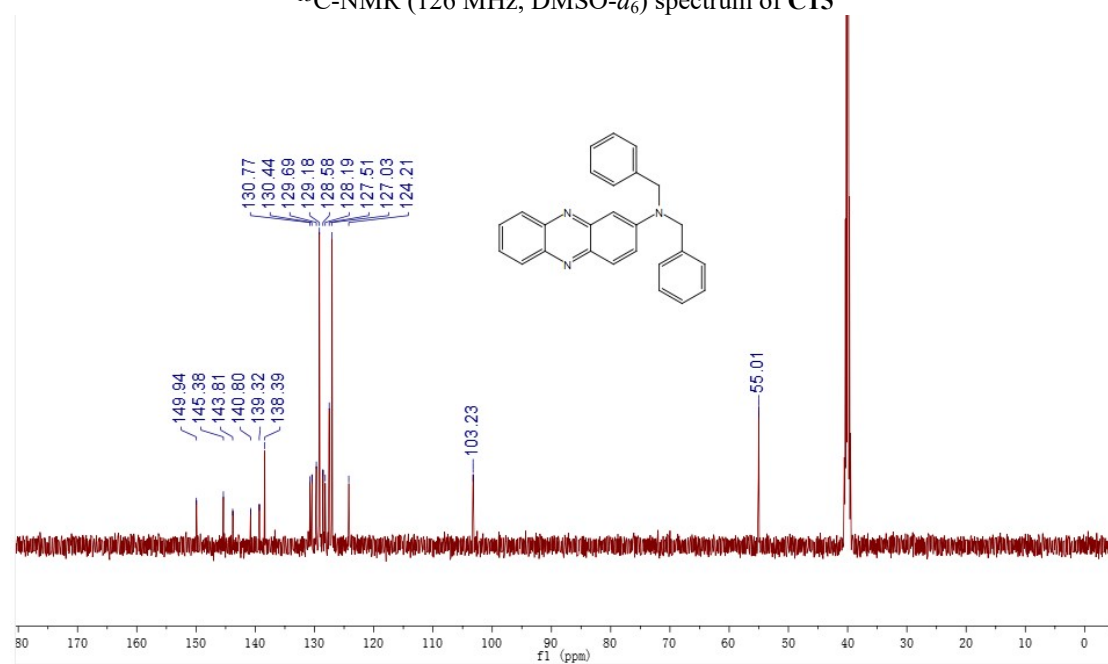

<sup>1</sup>H-NMR (500 MHz, DMSO-*d*<sub>6</sub>) spectrum of C16

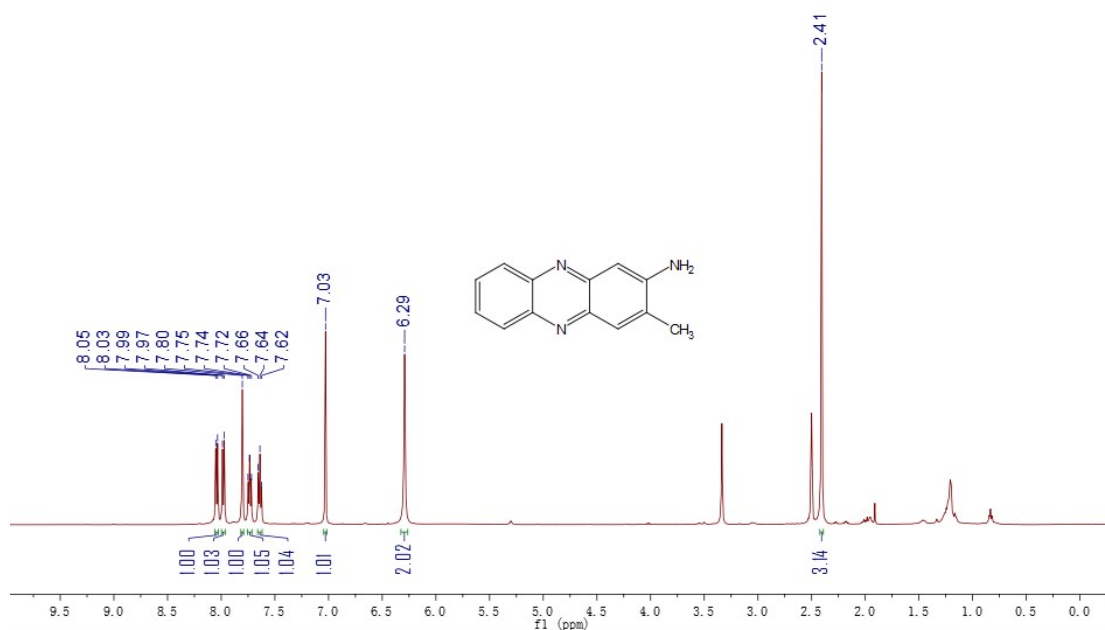

<sup>13</sup>C-NMR (126 MHz, DMSO-*d*<sub>6</sub>) spectrum of C16

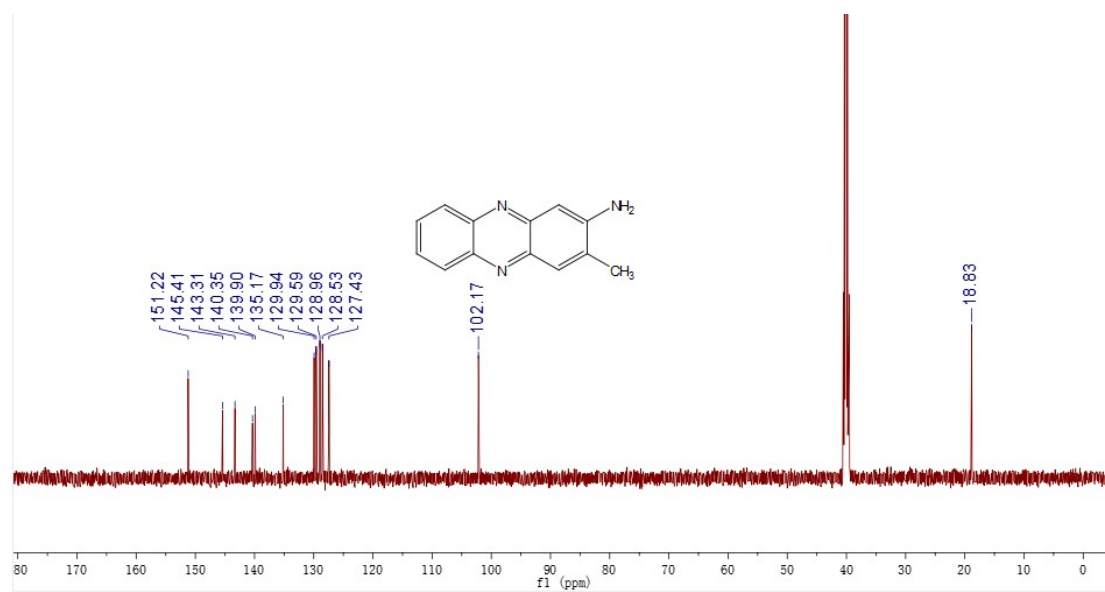

<sup>1</sup>H-NMR (500 MHz, DMSO-*d*<sub>6</sub>) spectrum of C17

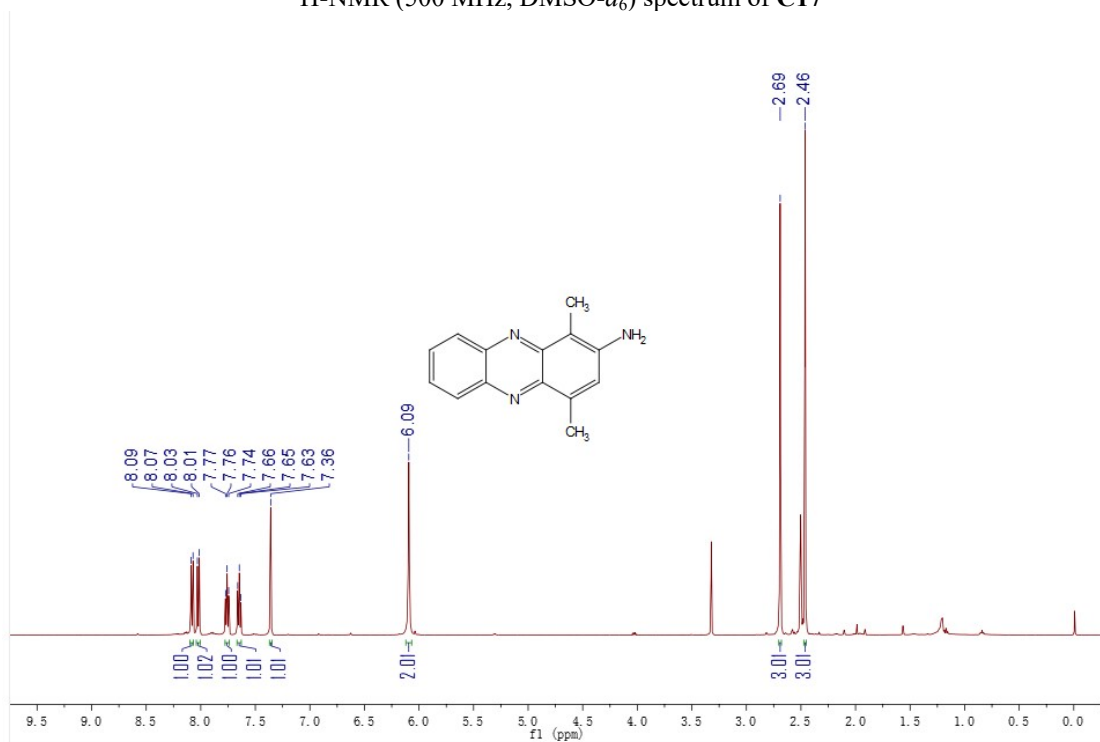

<sup>13</sup>C-NMR (126 MHz, DMSO-*d*<sub>6</sub>) spectrum of C17

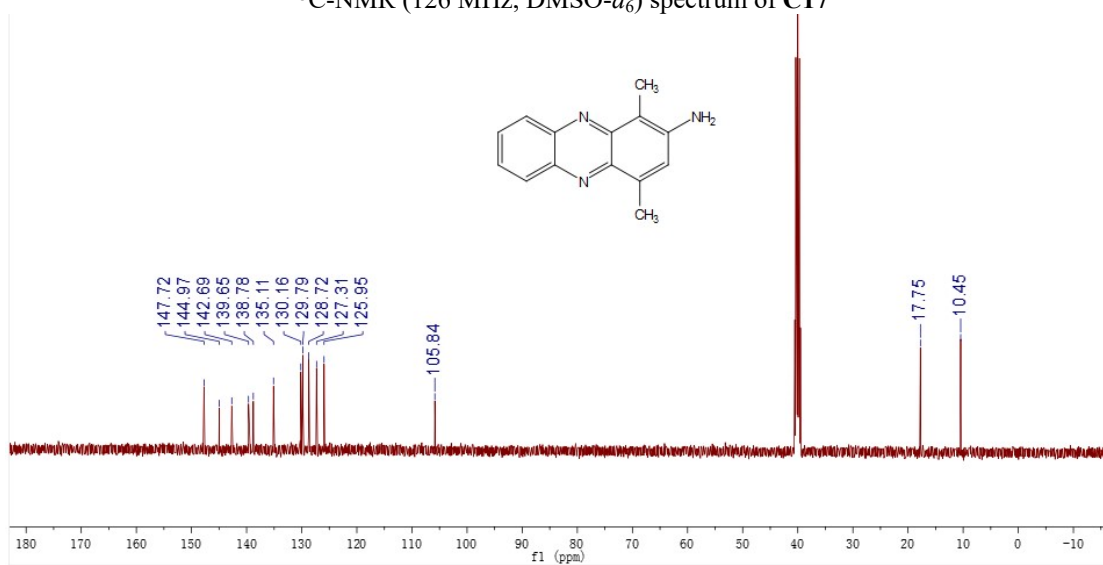

<sup>1</sup>H-NMR (500 MHz, DMSO-*d*<sub>6</sub>) spectrum of C18

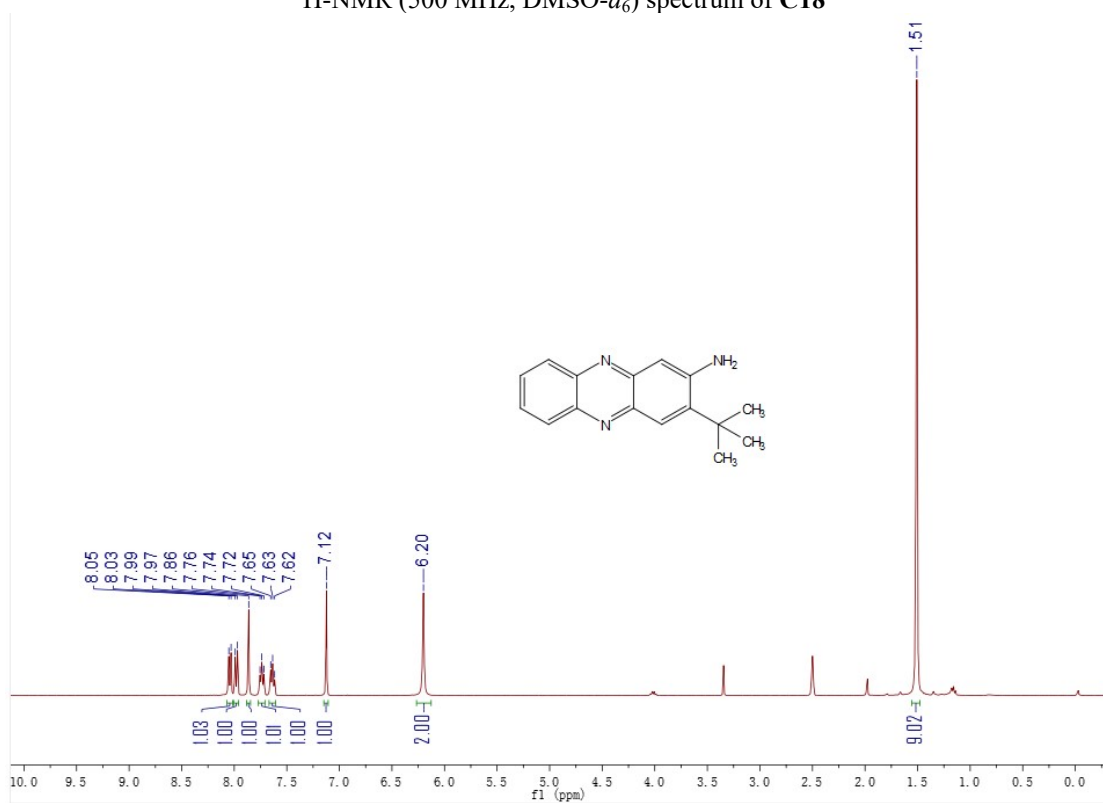

<sup>13</sup>C-NMR (126 MHz, DMSO-*d*<sub>6</sub>) spectrum of C18

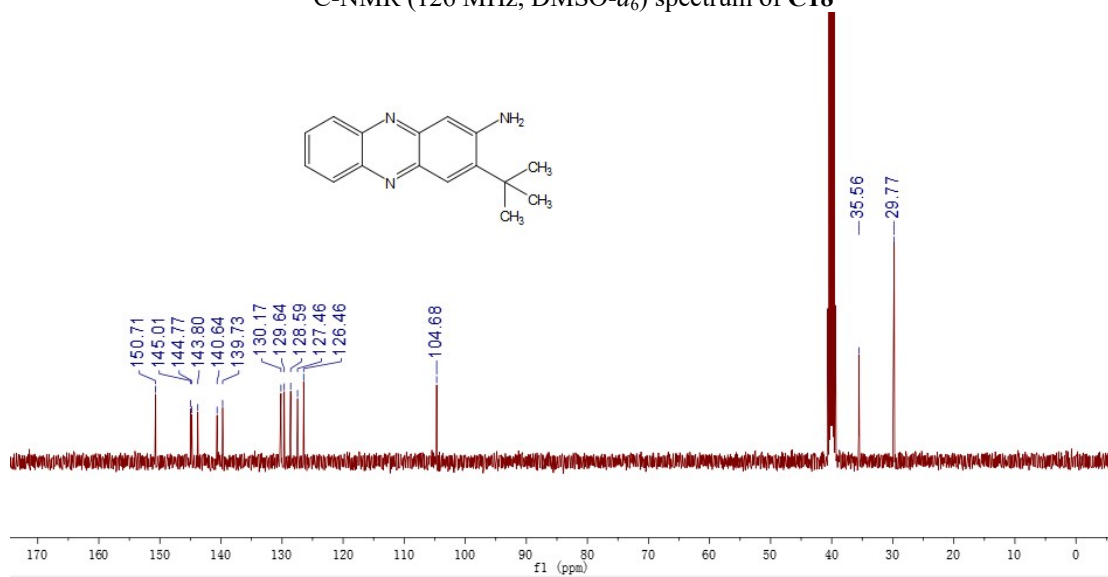

<sup>1</sup>H-NMR (500 MHz, DMSO-*d*<sub>6</sub>) spectrum of C19

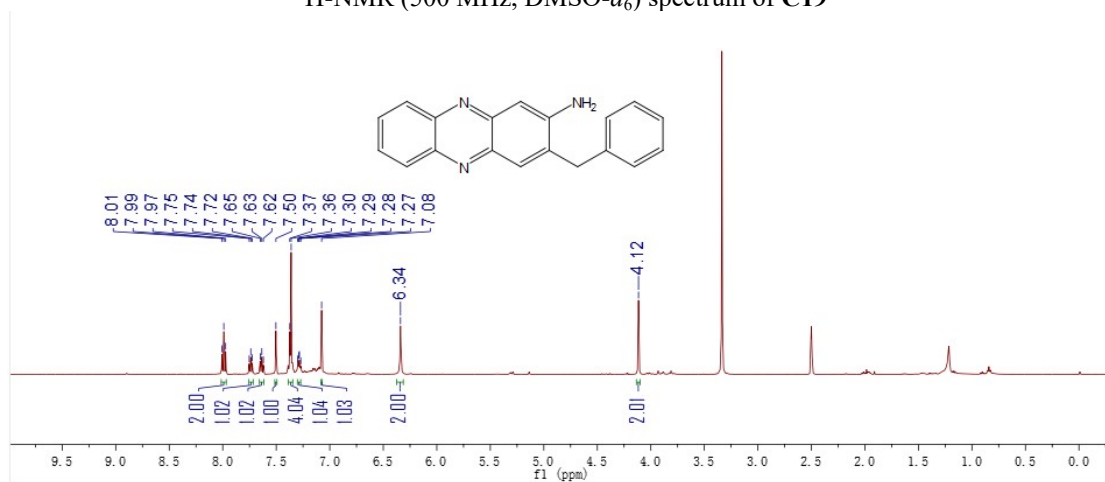

<sup>13</sup>C-NMR (126 MHz, DMSO-*d*<sub>6</sub>) spectrum of C19

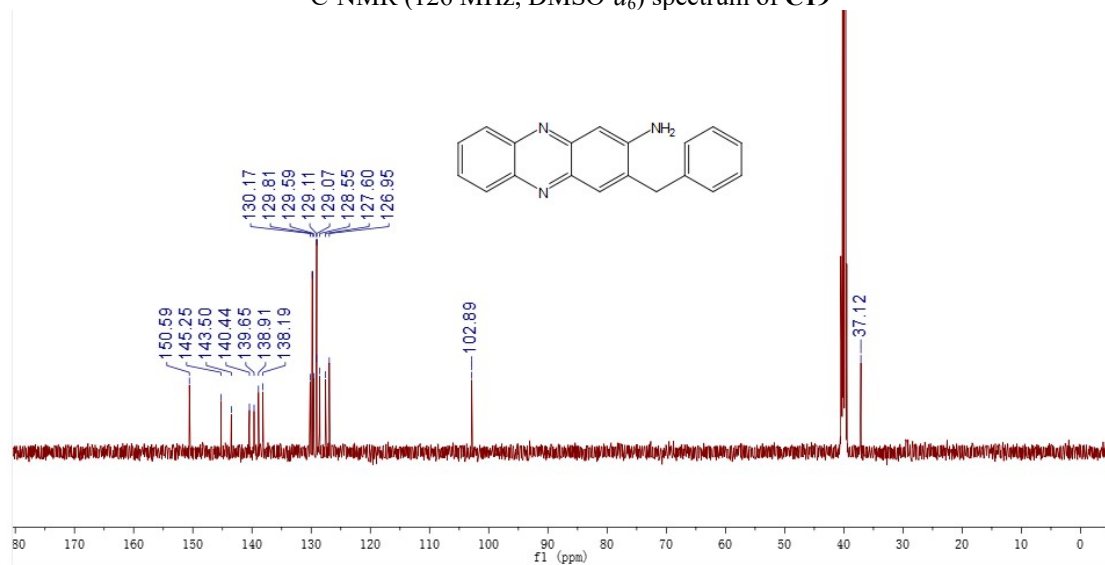

<sup>1</sup>H-NMR (500 MHz, DMSO-*d*<sub>6</sub>) spectrum of C19'

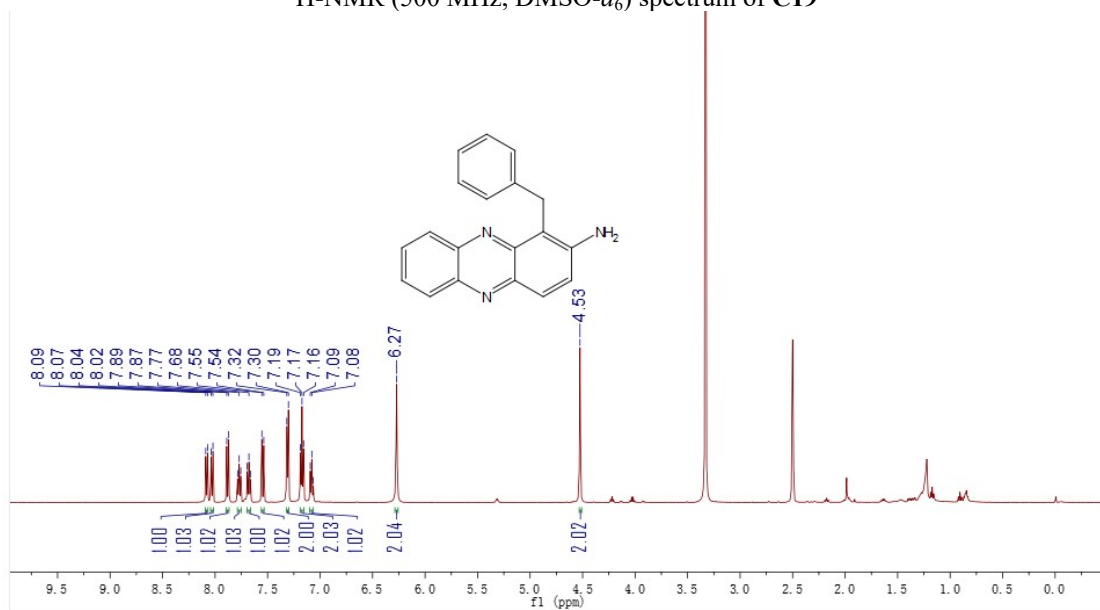

<sup>13</sup>C-NMR (126 MHz, DMSO-*d*<sub>6</sub>) spectrum of C19'

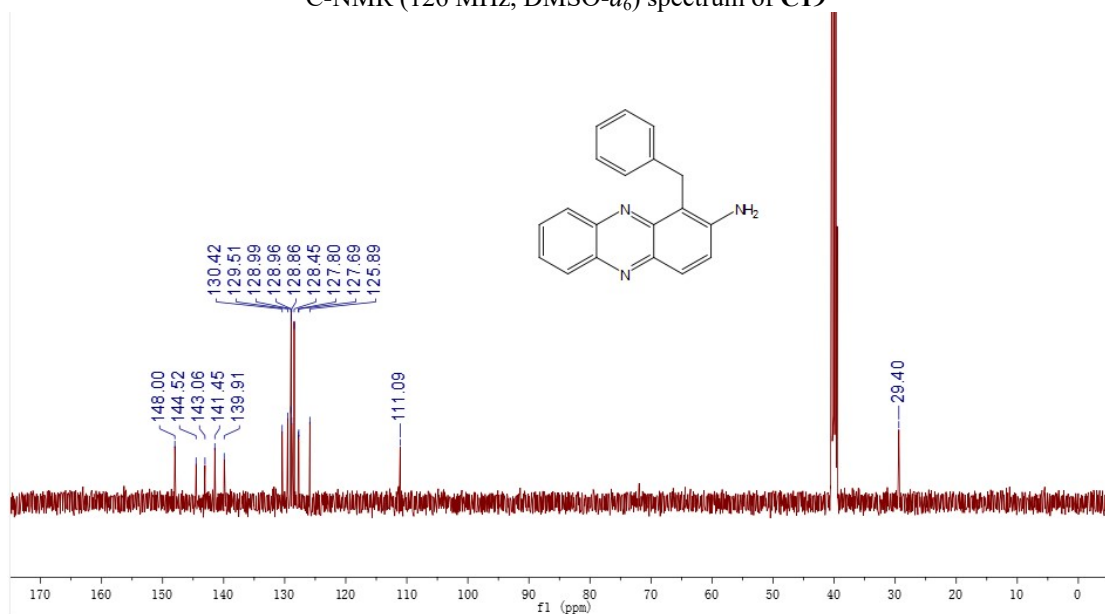



<sup>1</sup>H-NMR (500 MHz, DMSO-*d*<sub>6</sub>) spectrum of C20

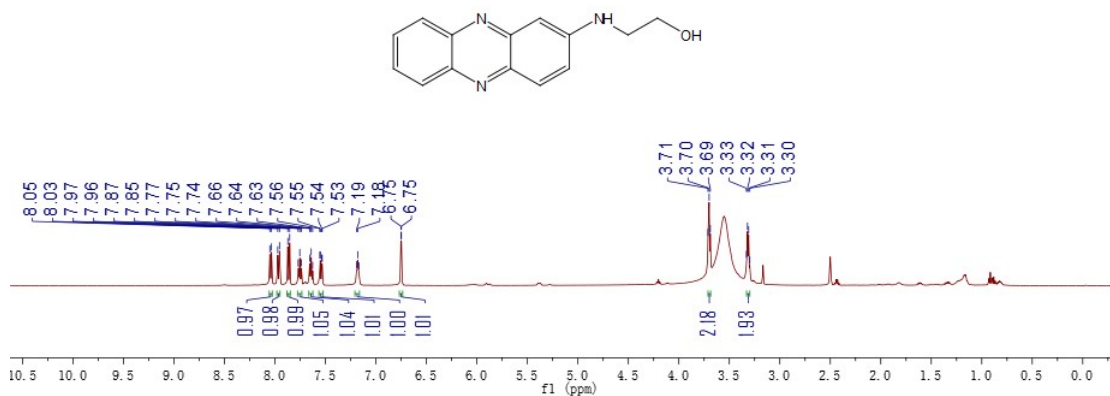

<sup>13</sup>C-NMR (126 MHz, DMSO-*d*<sub>6</sub>) spectrum of C20

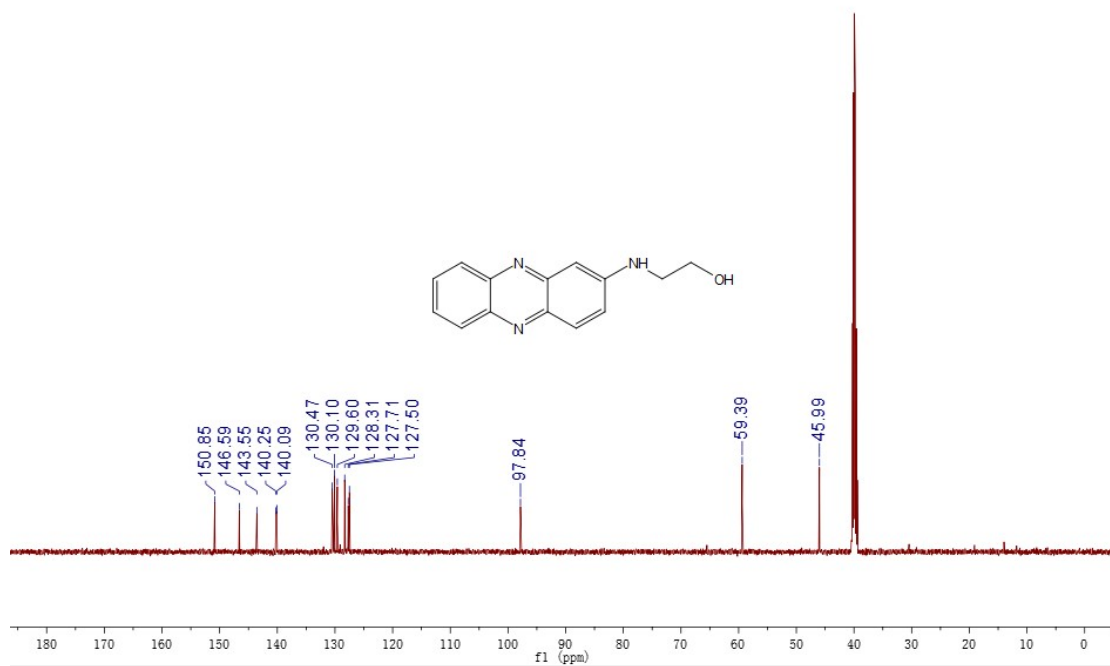

<sup>1</sup>H-NMR (500 MHz, DMSO-*d*<sub>6</sub>) spectrum of C21

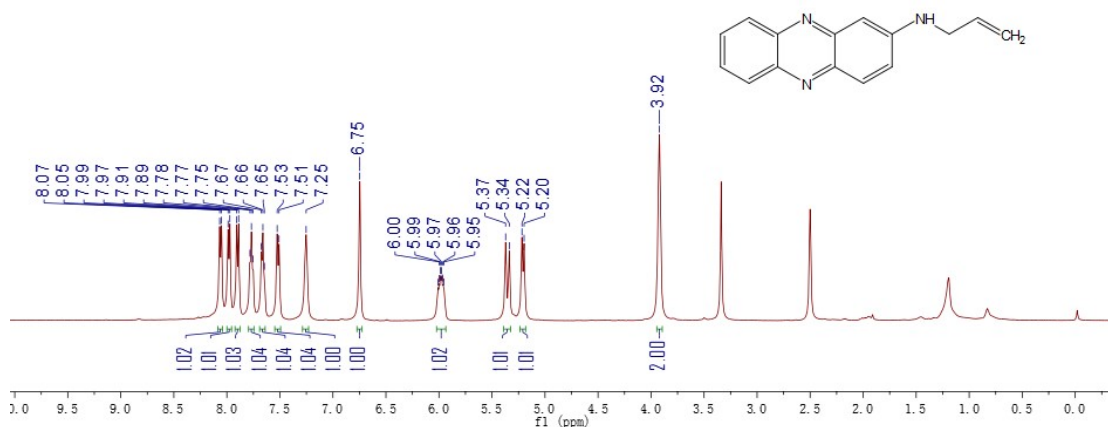

<sup>13</sup>C-NMR (126 MHz, DMSO-*d*<sub>6</sub>) spectrum of C21

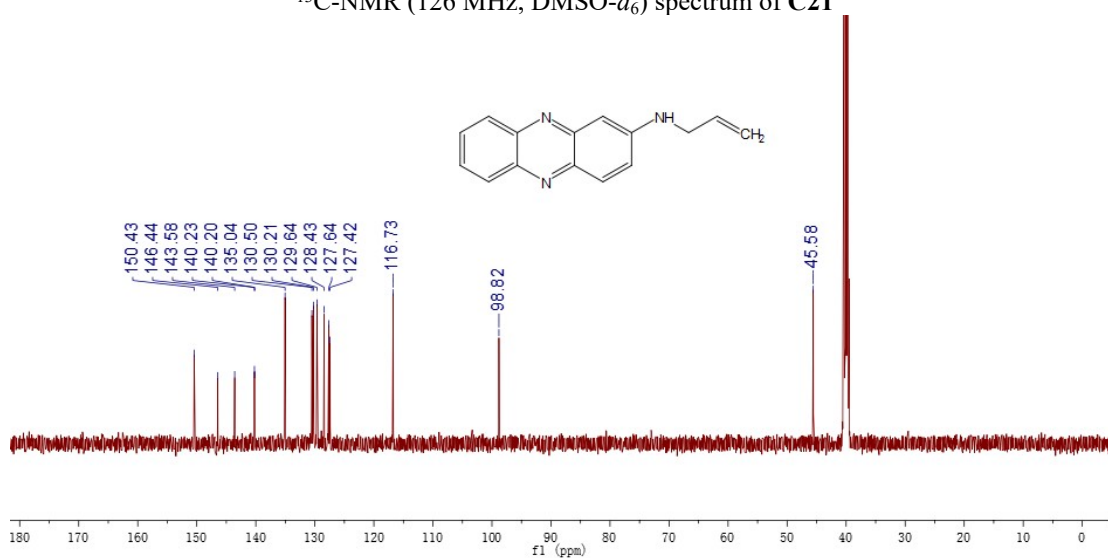

<sup>1</sup>H-NMR (500 MHz, DMSO-*d*<sub>6</sub>) spectrum of C22

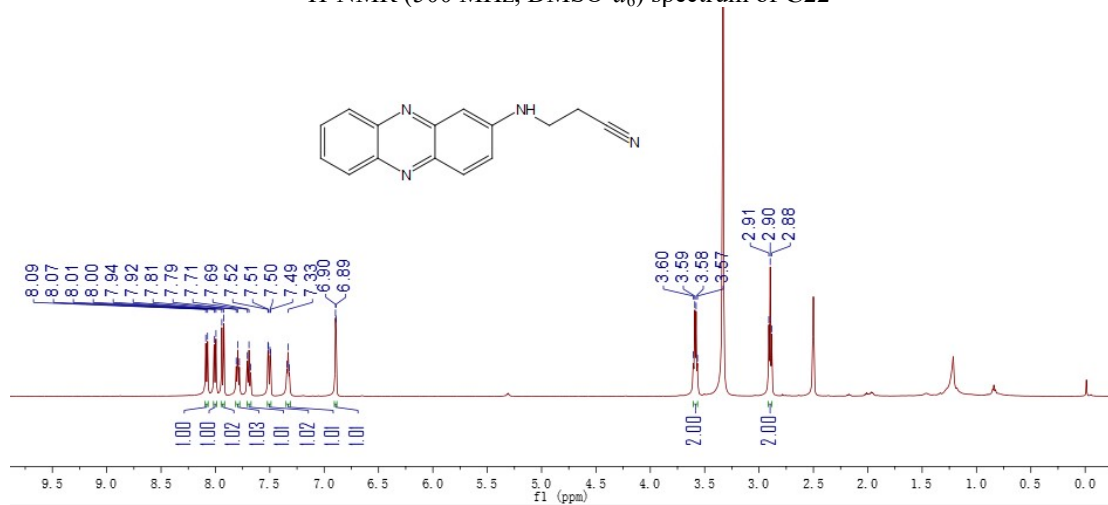

<sup>13</sup>C-NMR (126 MHz, DMSO-*d*<sub>6</sub>) spectrum of C22

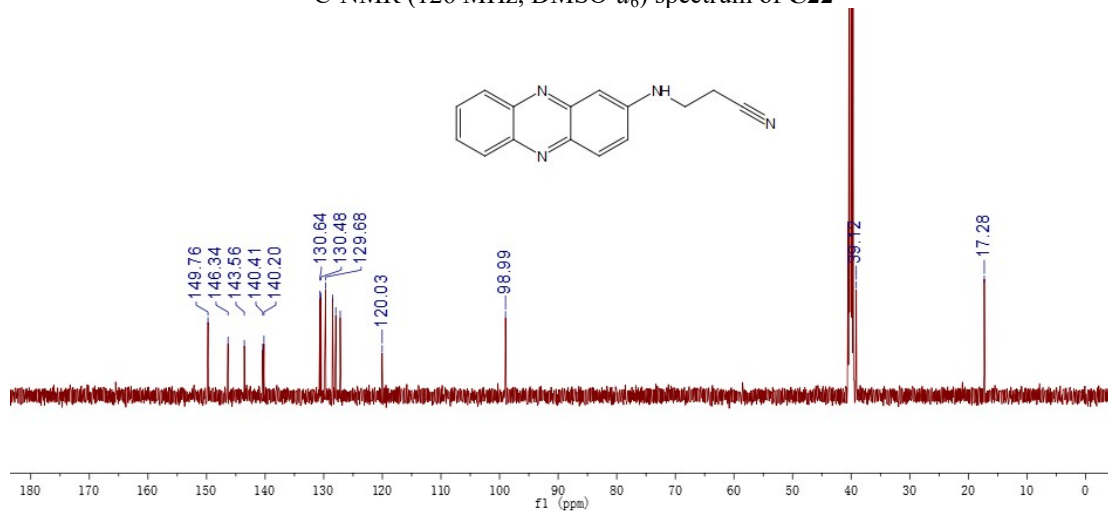

<sup>1</sup>H-NMR (500 MHz, DMSO-*d*<sub>6</sub>) spectrum of C23

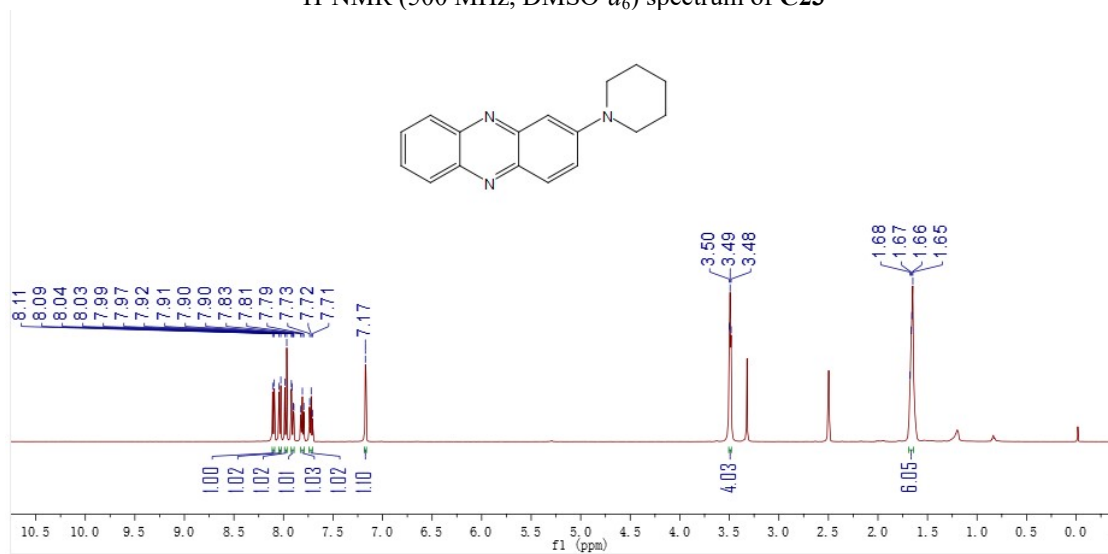

<sup>13</sup>C-NMR (126 MHz, DMSO-*d*<sub>6</sub>) spectrum of C23

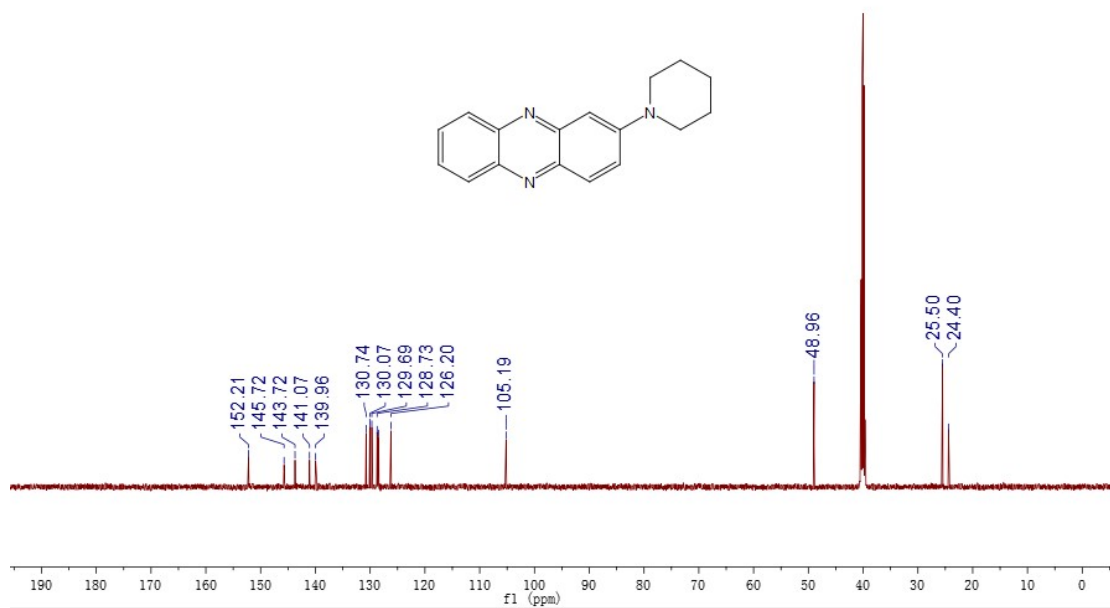

<sup>1</sup>H-NMR (500 MHz, DMSO-*d*<sub>6</sub>) spectrum of C24

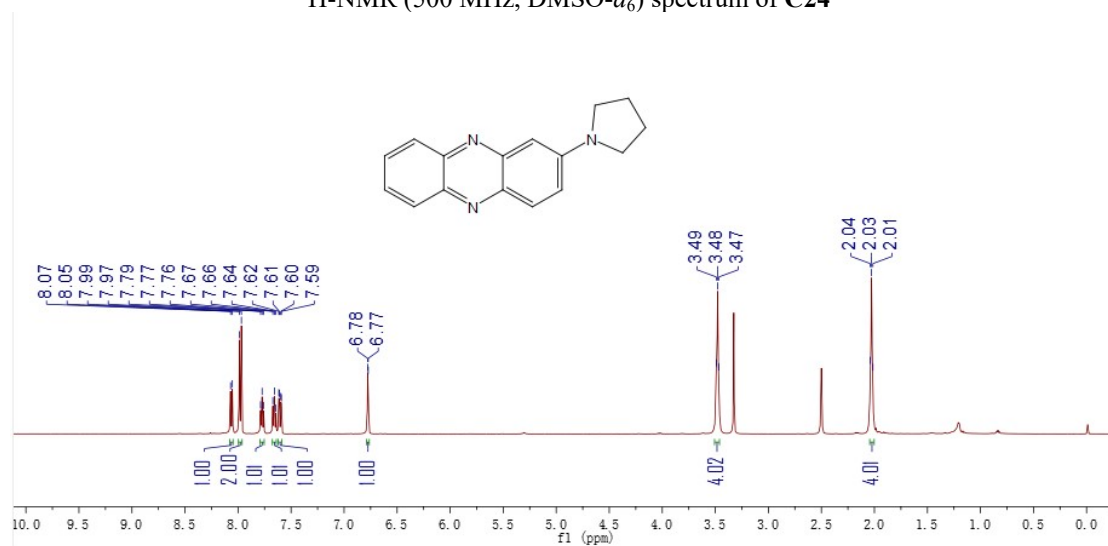

<sup>13</sup>C-NMR (126 MHz, DMSO-*d*<sub>6</sub>) spectrum of C24

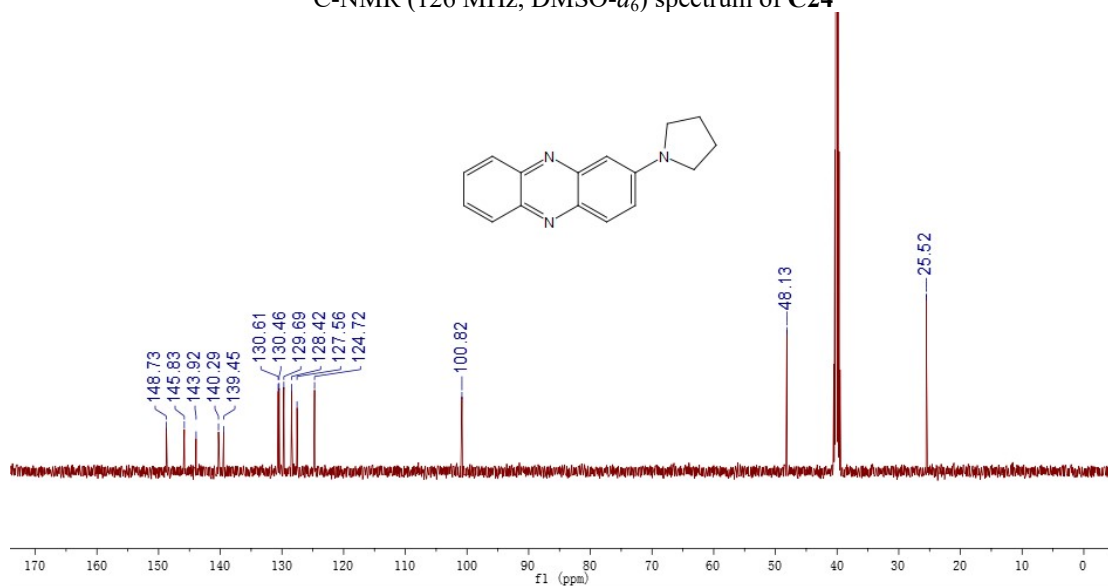

<sup>1</sup>H-NMR (500 MHz, DMSO-*d*<sub>6</sub>) spectrum of C25

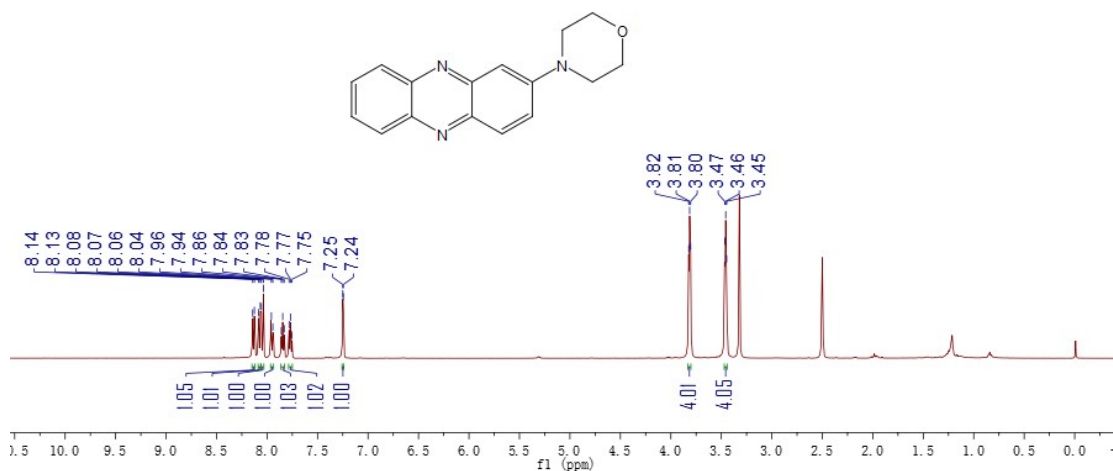

<sup>13</sup>C-NMR (126 MHz, DMSO-*d*<sub>6</sub>) spectrum of C25

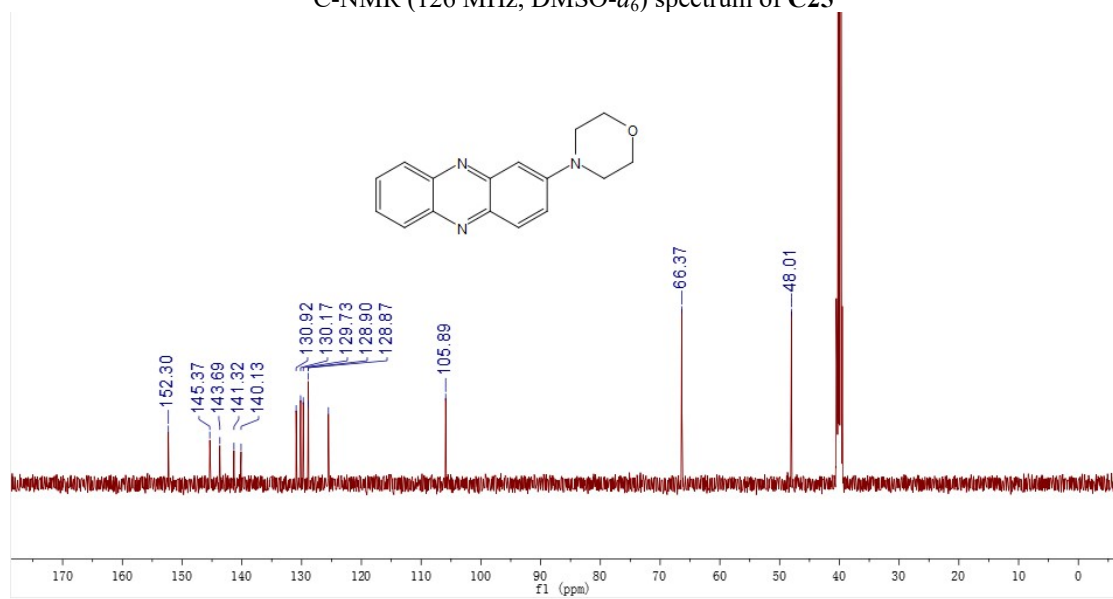

<sup>1</sup>H-NMR (500 MHz, DMSO-*d*<sub>6</sub>) spectrum of C26

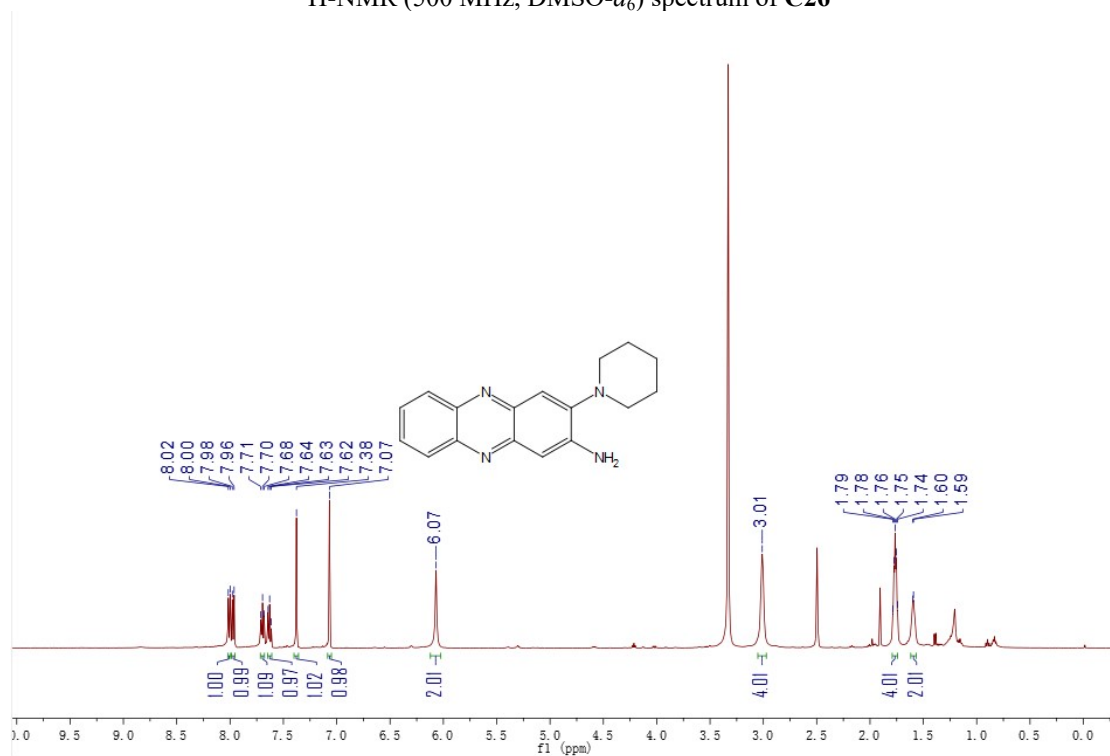

<sup>13</sup>C-NMR (126 MHz, DMSO-*d*<sub>6</sub>) spectrum of C26

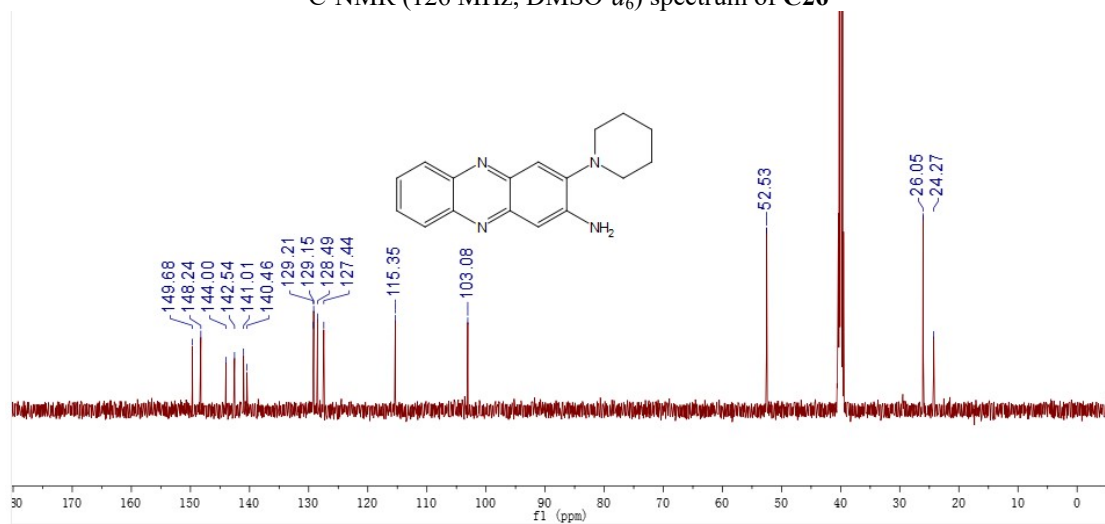

<sup>1</sup>H-NMR (500 MHz, DMSO-*d*<sub>6</sub>) spectrum of **C27**

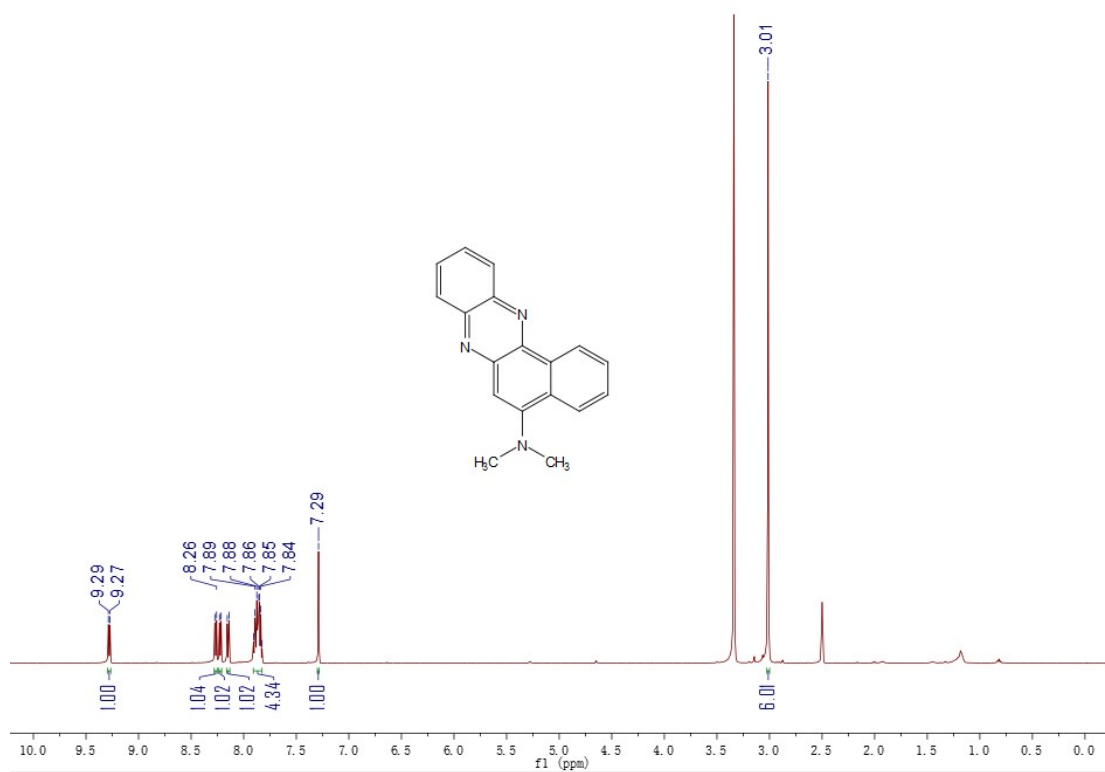

<sup>13</sup>C-NMR (126 MHz, DMSO-*d*<sub>6</sub>) spectrum of **C27**

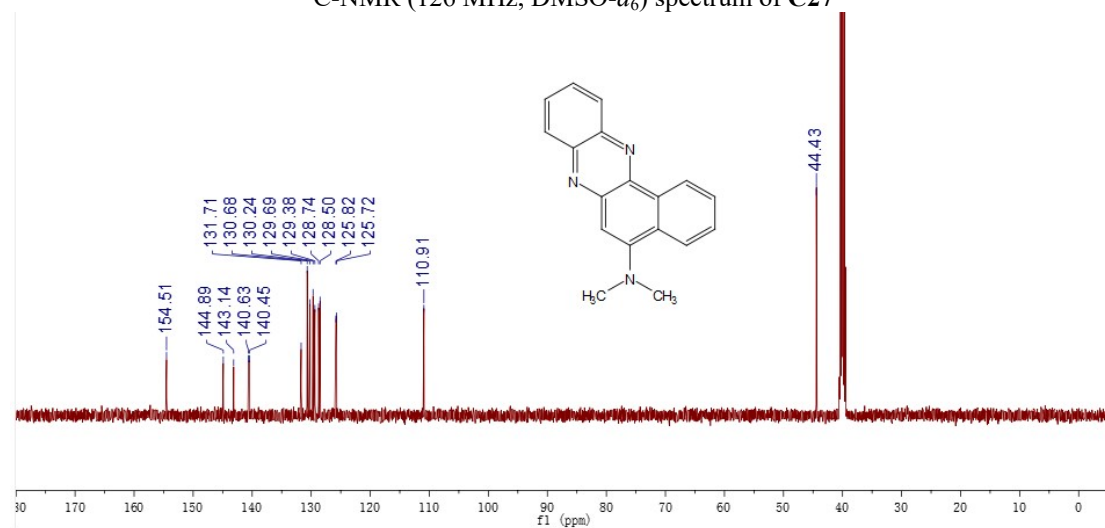



<sup>1</sup>H-NMR (500 MHz, DMSO-*d*<sub>6</sub>) spectrum of C28

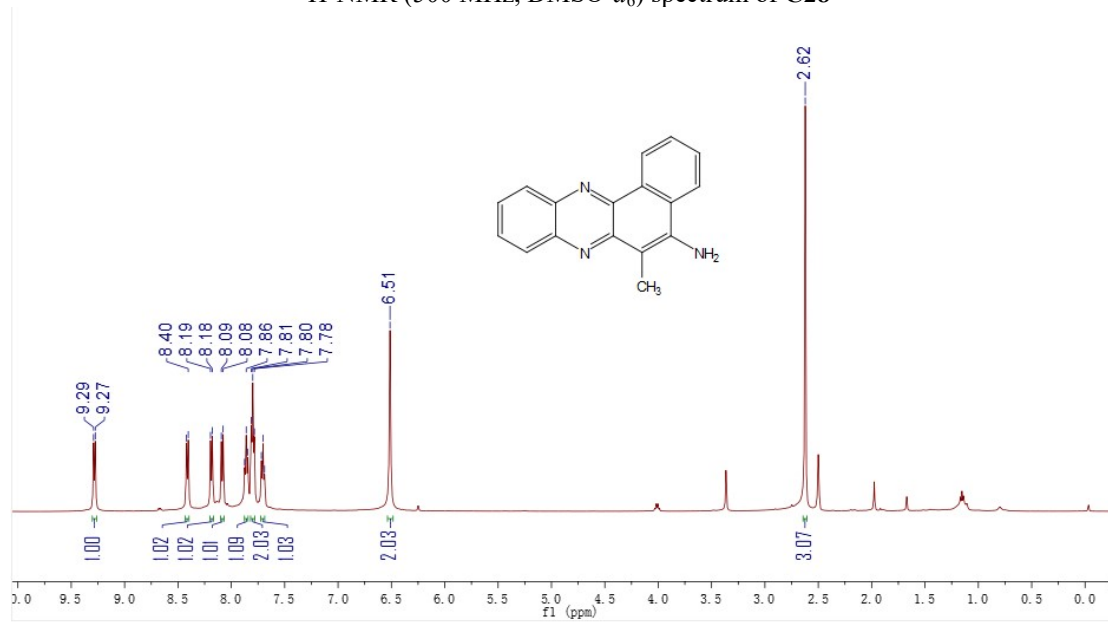

<sup>13</sup>C-NMR (126 MHz, DMSO-*d*<sub>6</sub>) spectrum of C28

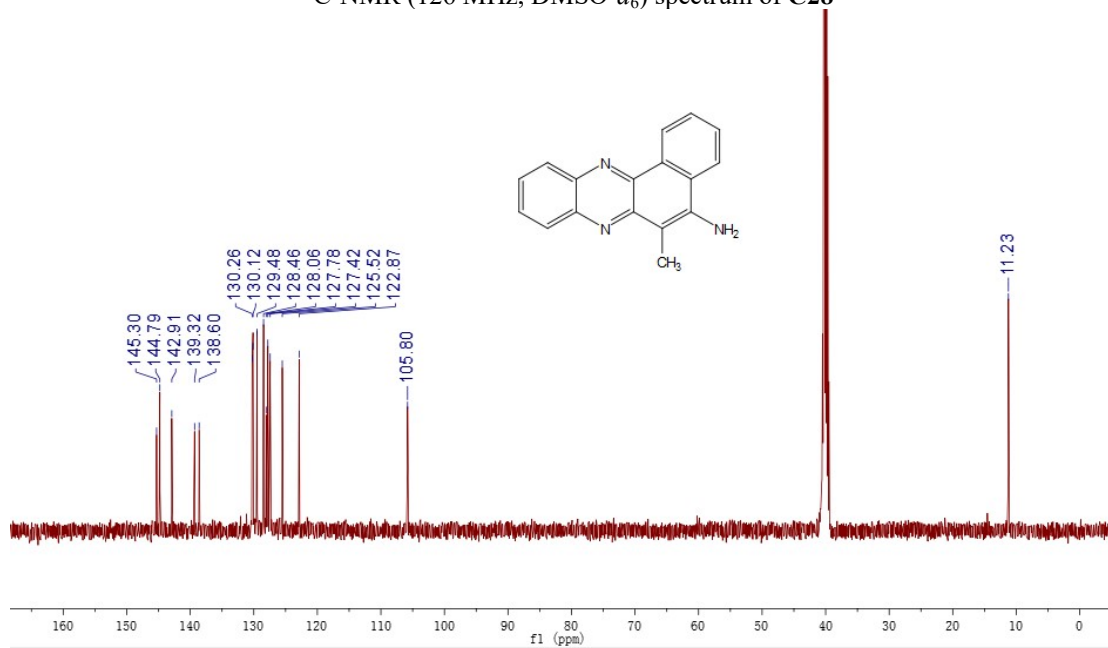

<sup>1</sup>H-NMR (500 MHz, DMSO-*d*<sub>6</sub>) spectrum of C29

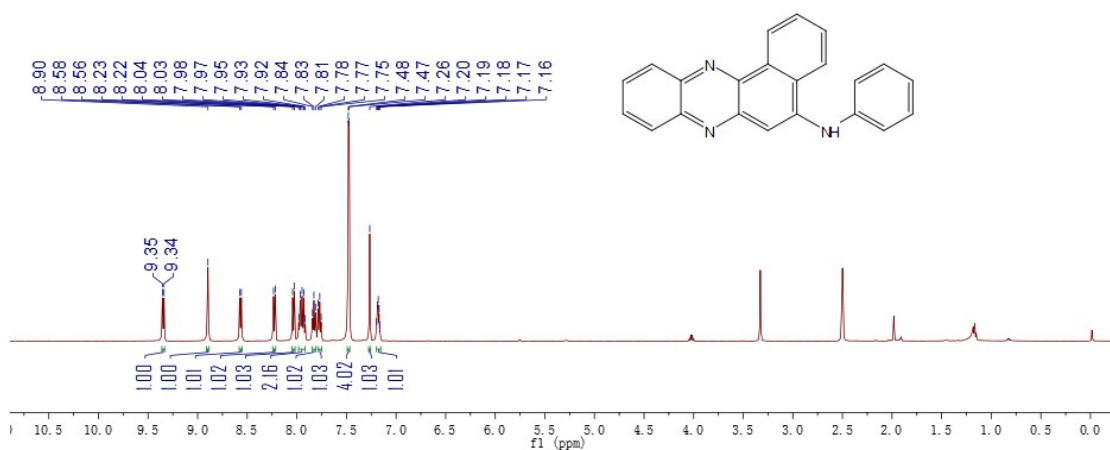

<sup>13</sup>C-NMR (126 MHz, DMSO-*d*<sub>6</sub>) spectrum of C29

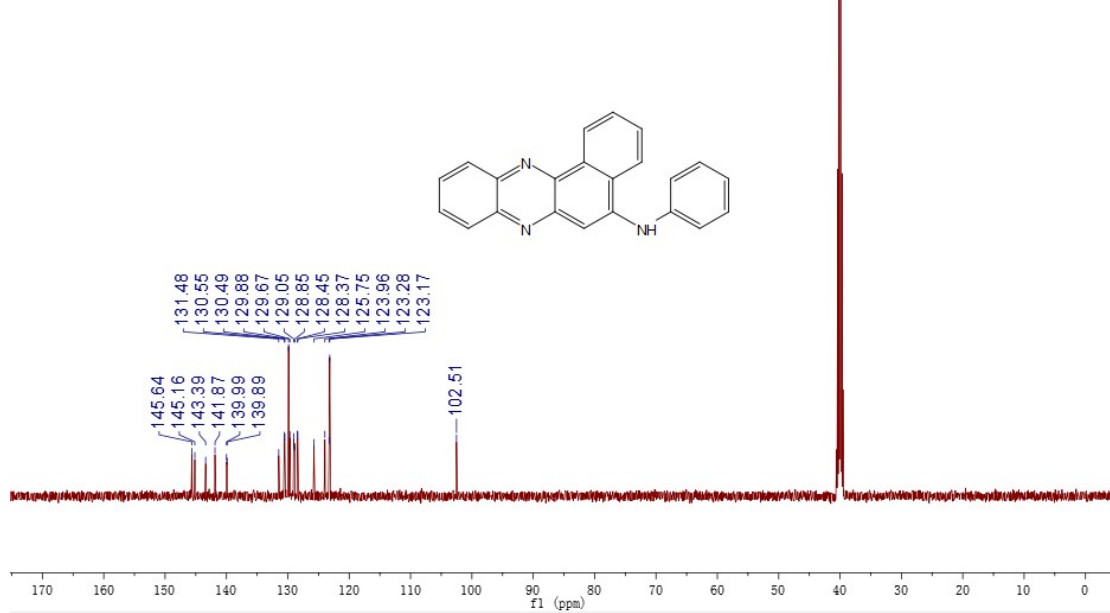

<sup>1</sup>H-NMR (500 MHz, DMSO-*d*<sub>6</sub>) spectrum of C30

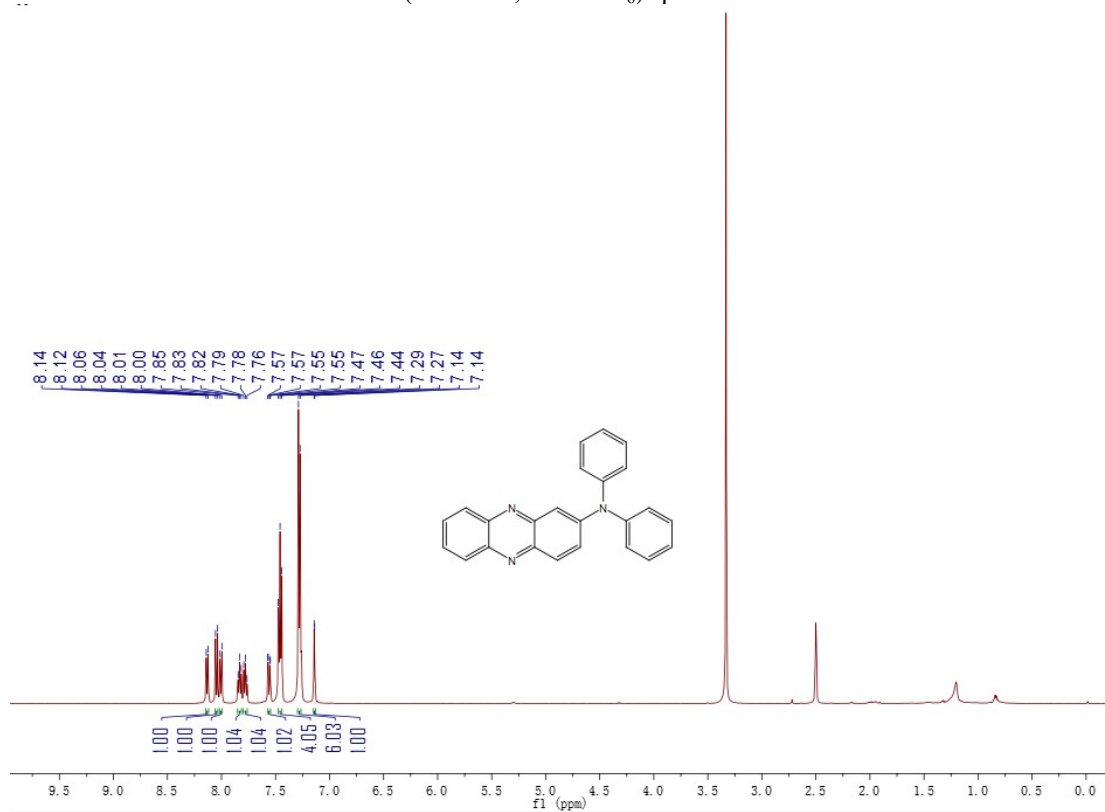

<sup>13</sup>C-NMR (126 MHz, DMSO-*d*<sub>6</sub>) spectrum of C30

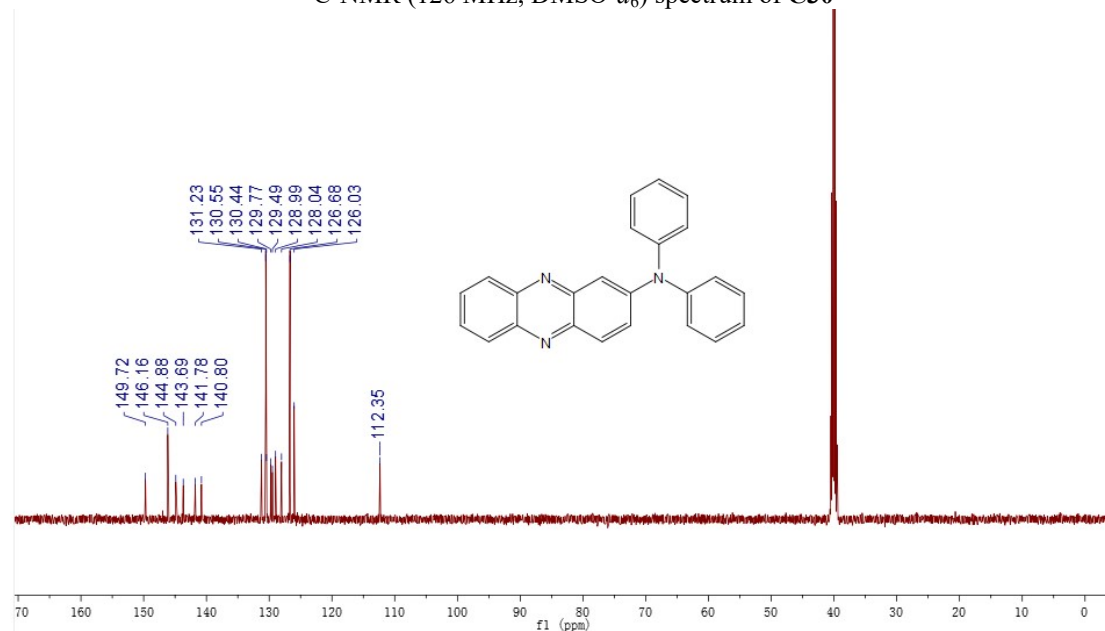

<sup>1</sup>H-NMR (500 MHz, DMSO-*d*<sub>6</sub>) spectrum of C31

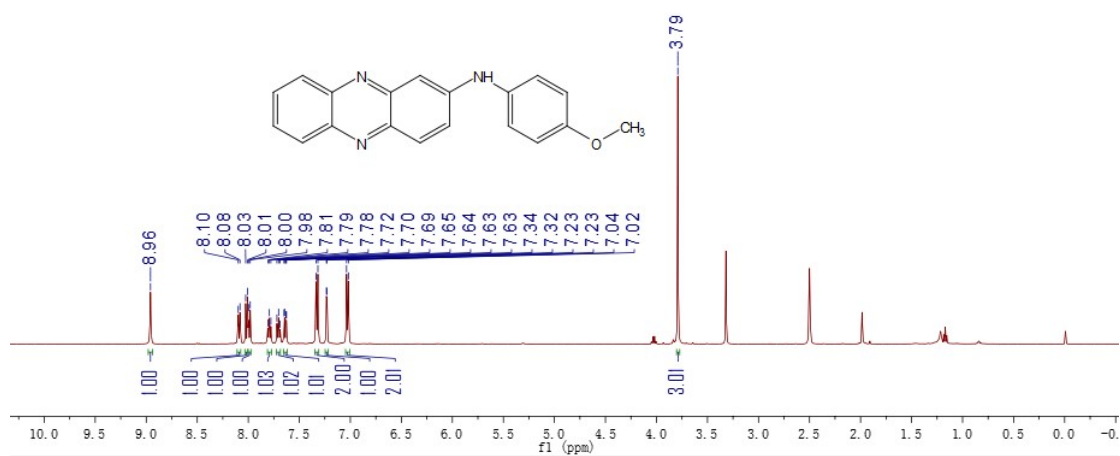

<sup>13</sup>C-NMR (126 MHz, DMSO-*d*<sub>6</sub>) spectrum of C31

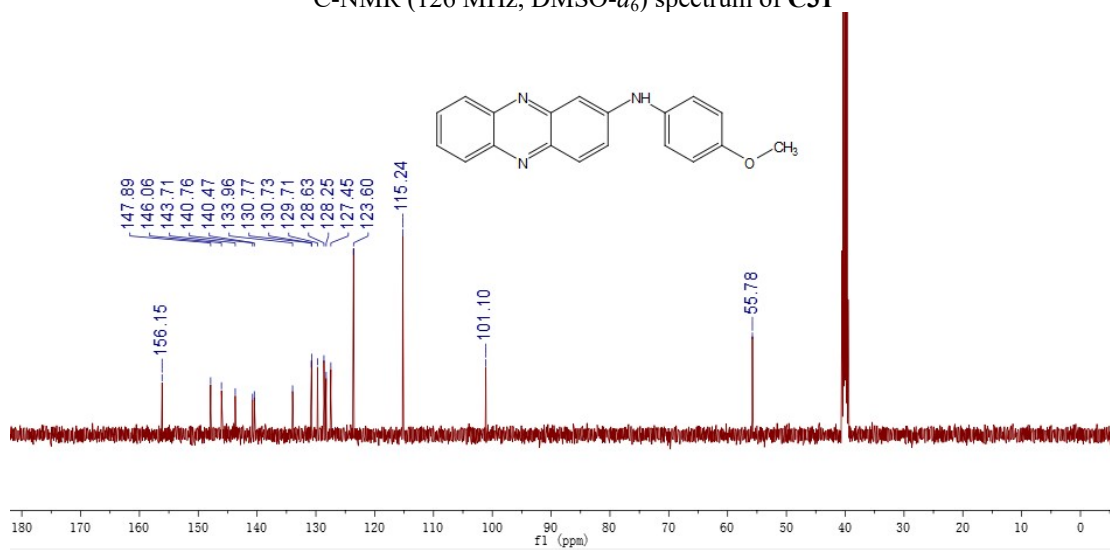

<sup>1</sup>H-NMR (500 MHz, DMSO-*d*<sub>6</sub>) spectrum of C32

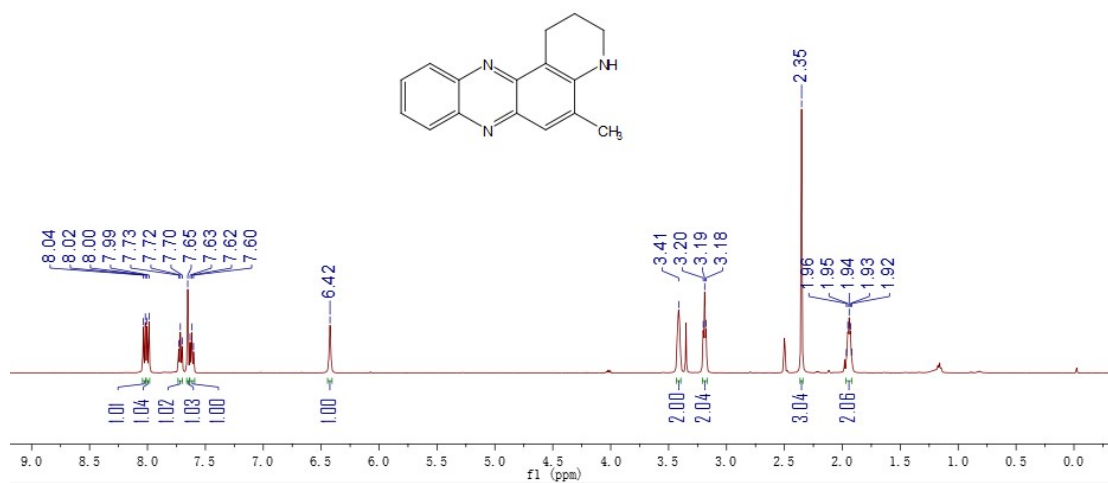

<sup>13</sup>C-NMR (126 MHz, DMSO-*d*<sub>6</sub>) spectrum of C32

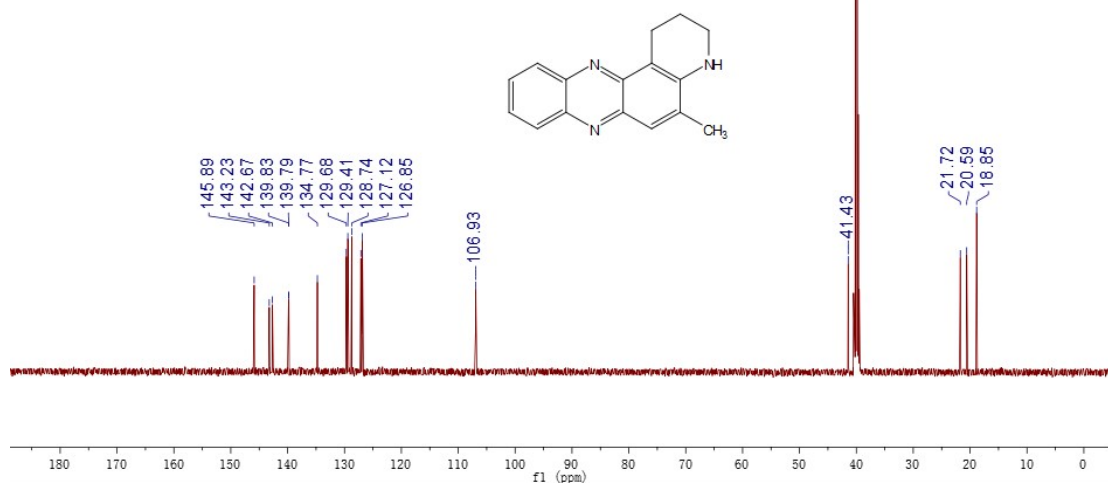

$^1\text{H-NMR}$  (500 MHz,  $\text{DMSO-}d_6$ ) spectrum of C33

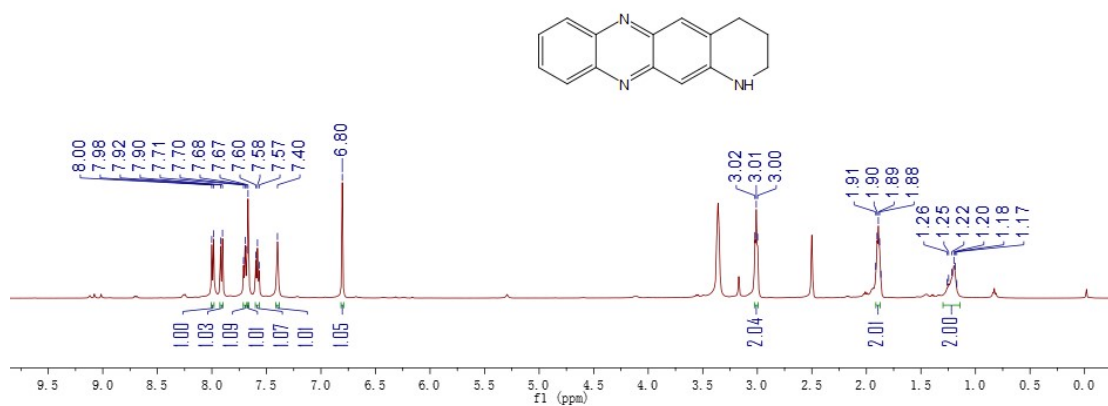

$^{13}\text{C-NMR}$  (126 MHz,  $\text{DMSO-}d_6$ ) spectrum of C33

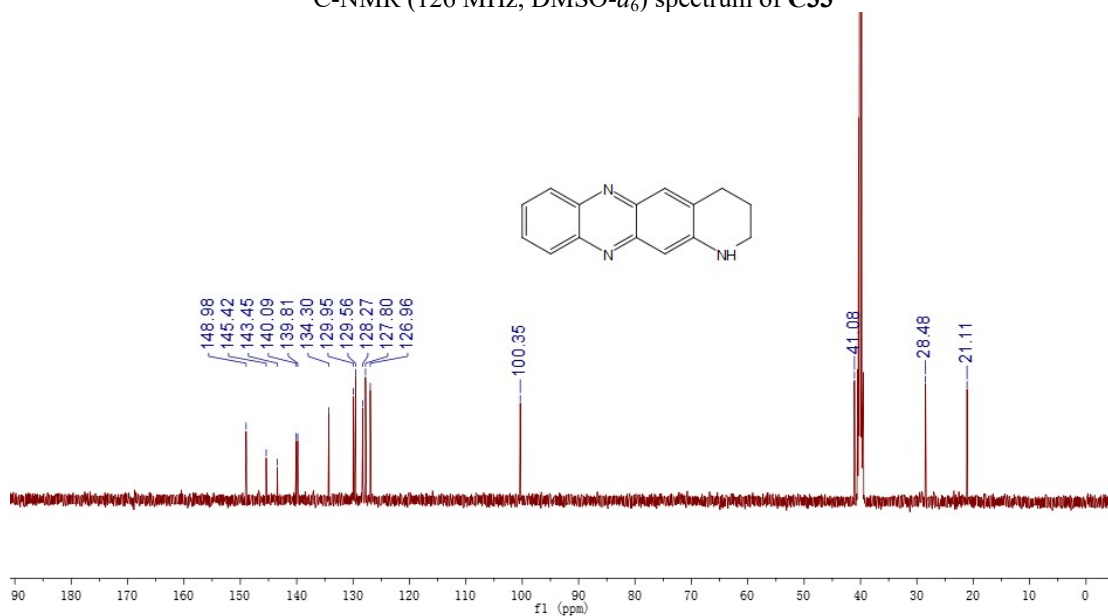

<sup>1</sup>H-NMR (400 MHz, CDCl<sub>3</sub>) spectrum of C33'

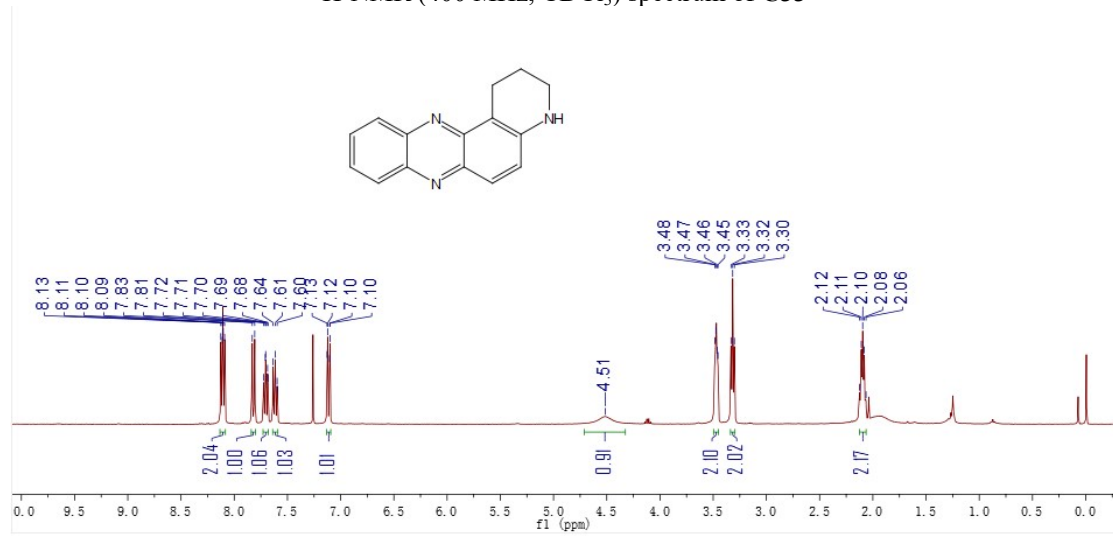

<sup>13</sup>C-NMR (101 MHz, CDCl<sub>3</sub>) spectrum of C33'

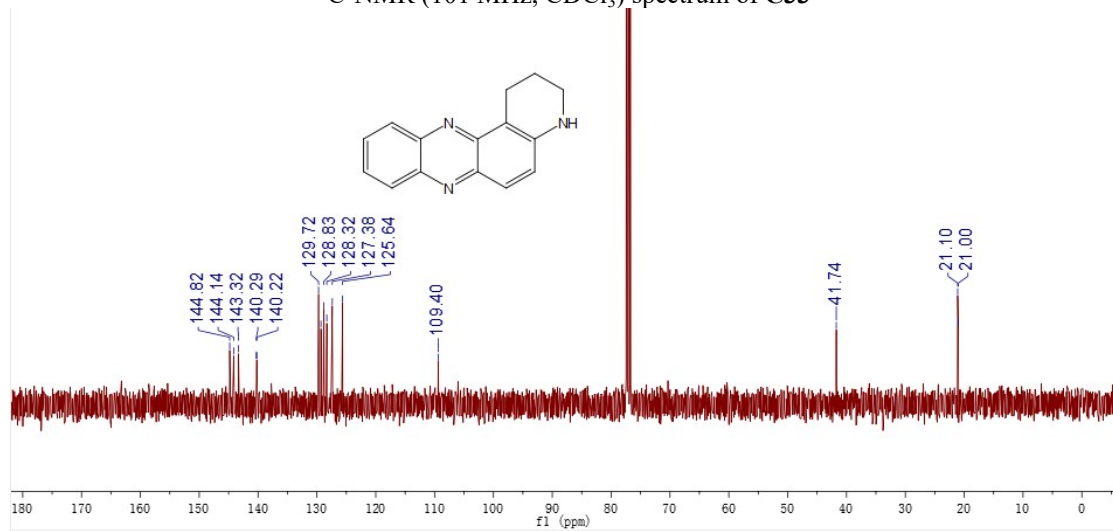

<sup>1</sup>H-NMR (500 MHz, DMSO-*d*<sub>6</sub>) spectrum of C34

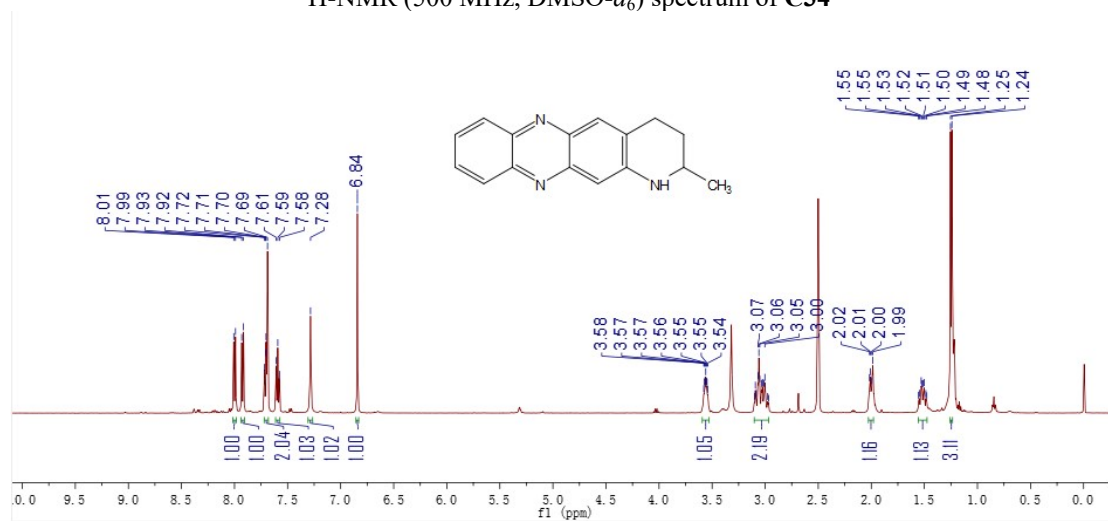

<sup>13</sup>C-NMR (126 MHz, DMSO-*d*<sub>6</sub>) spectrum of C34

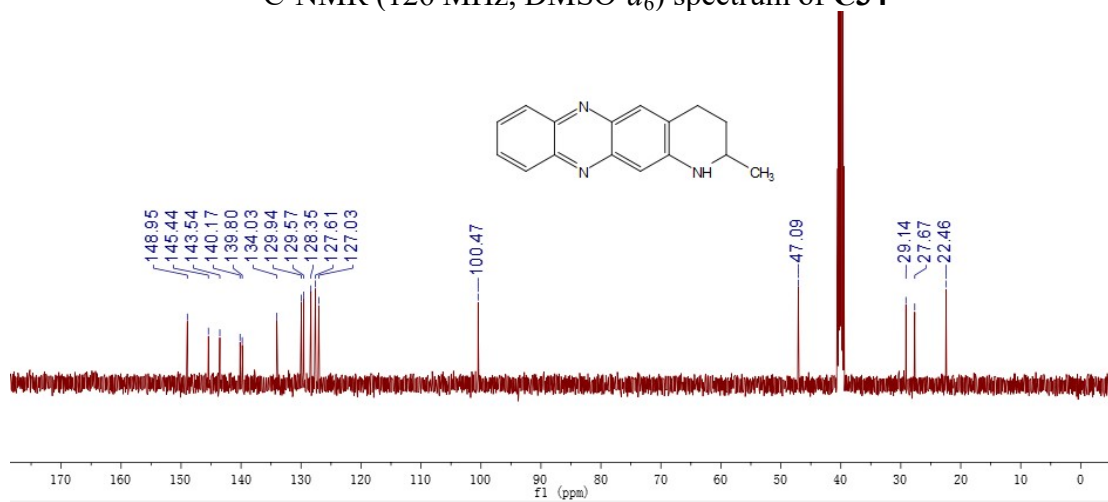



<sup>1</sup>H-NMR (500 MHz, DMSO-*d*<sub>6</sub>) spectrum of C34'

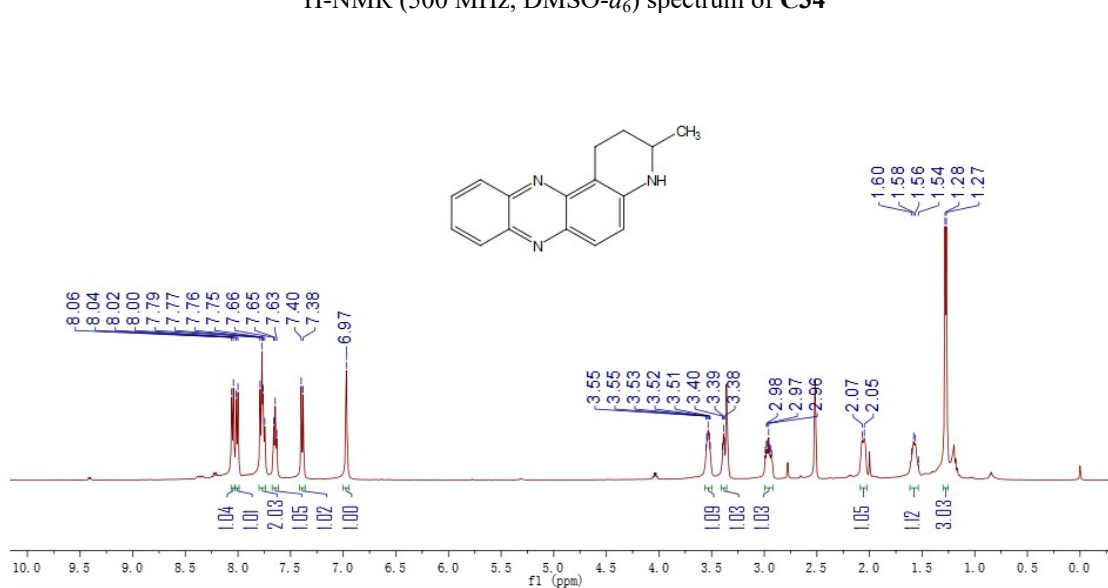

<sup>13</sup>C-NMR (126 MHz, DMSO-*d*<sub>6</sub>) spectrum of C34'

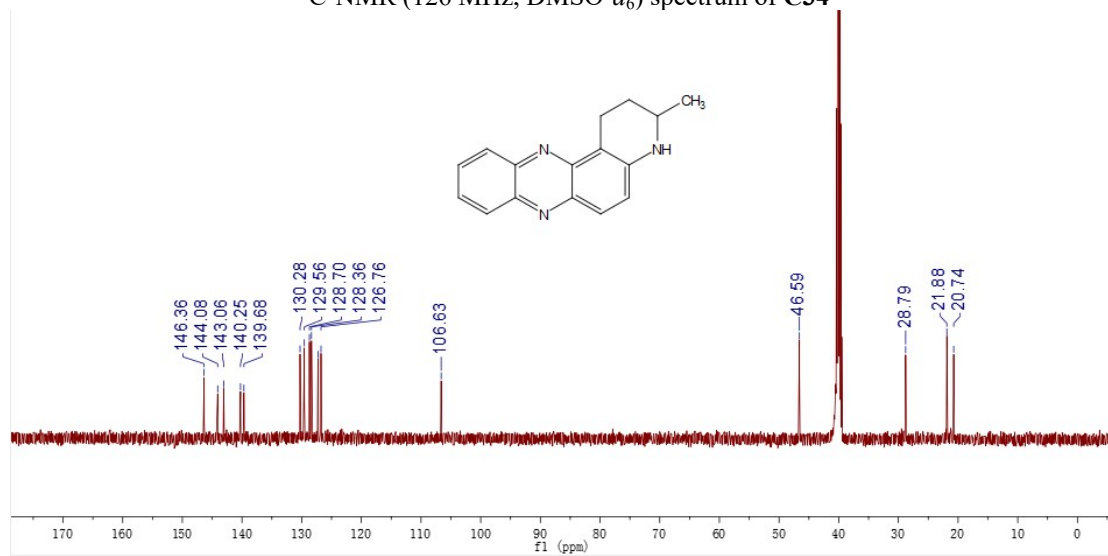

<sup>1</sup>H-NMR (500 MHz, CDCl<sub>3</sub>) spectrum of C35

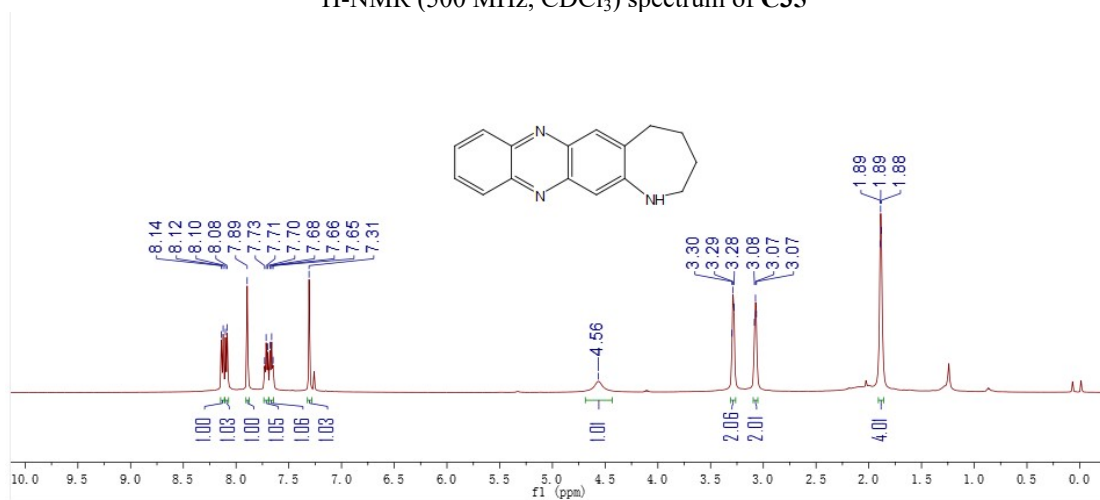

<sup>13</sup>C-NMR (126 MHz, CDCl<sub>3</sub>) spectrum of C35

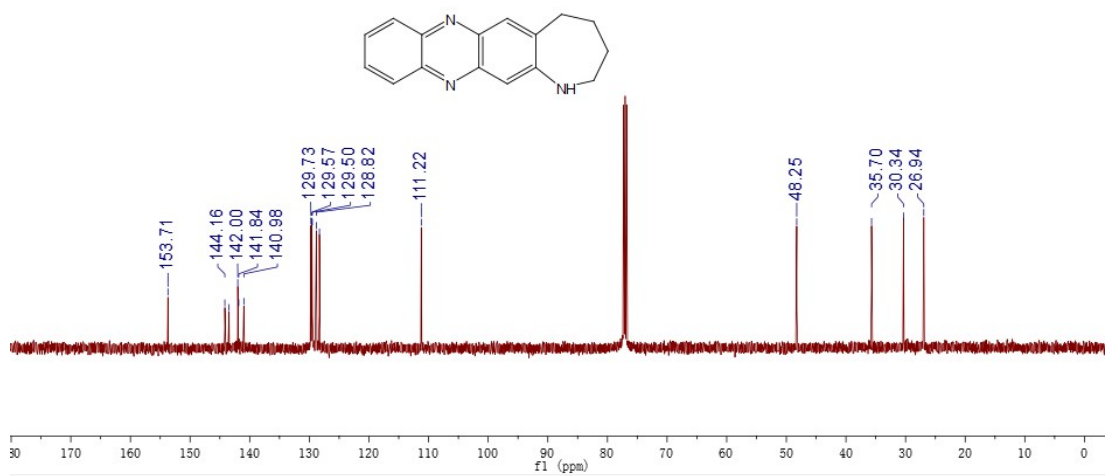

<sup>1</sup>H-NMR (500 MHz, CDCl<sub>3</sub>) spectrum of C35'

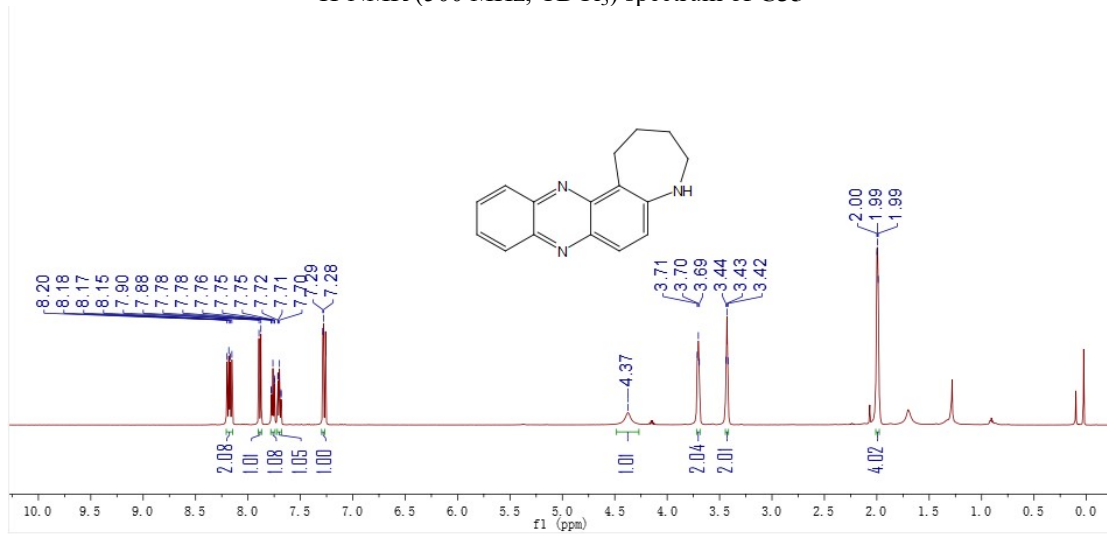

<sup>13</sup>C-NMR (126 MHz, CDCl<sub>3</sub>) spectrum of C35'

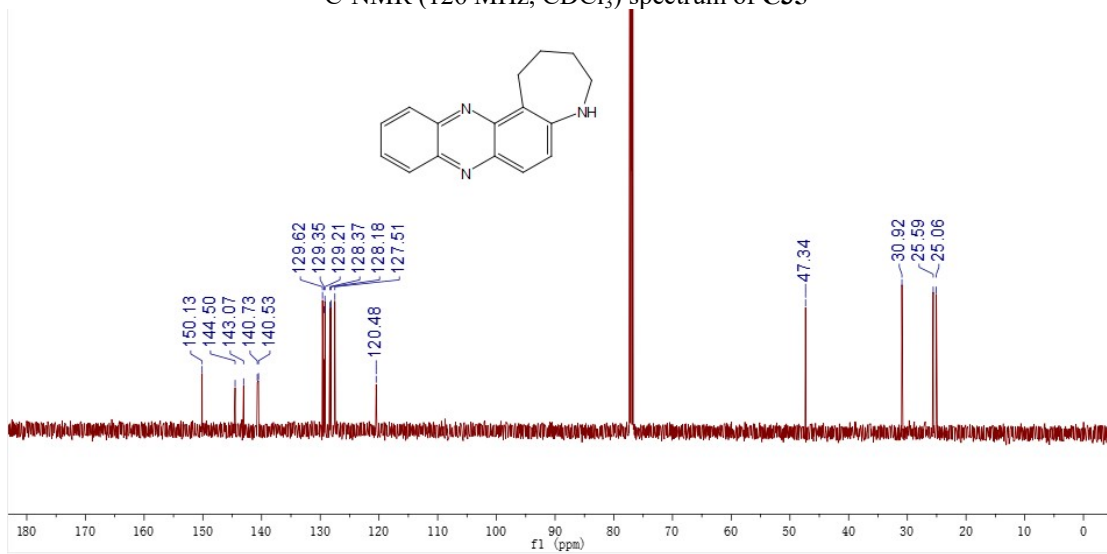

<sup>1</sup>H-NMR (500 MHz, DMSO-*d*<sub>6</sub>) spectrum of C36

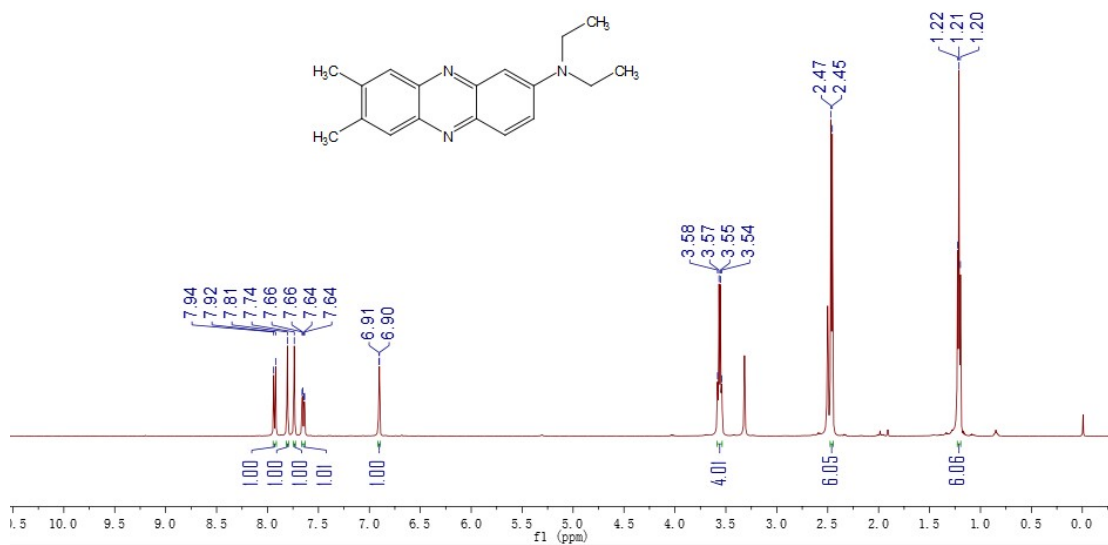

<sup>13</sup>C-NMR (126 MHz, DMSO-*d*<sub>6</sub>) spectrum of C36

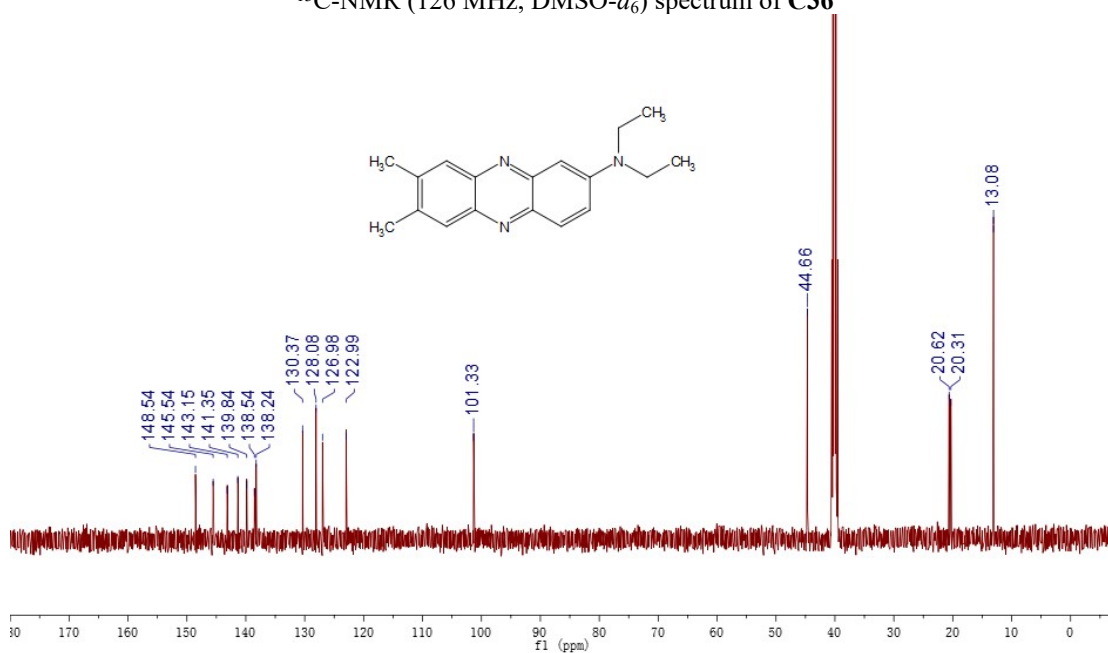

<sup>1</sup>H-NMR (500 MHz, DMSO-*d*<sub>6</sub>) spectrum of C37

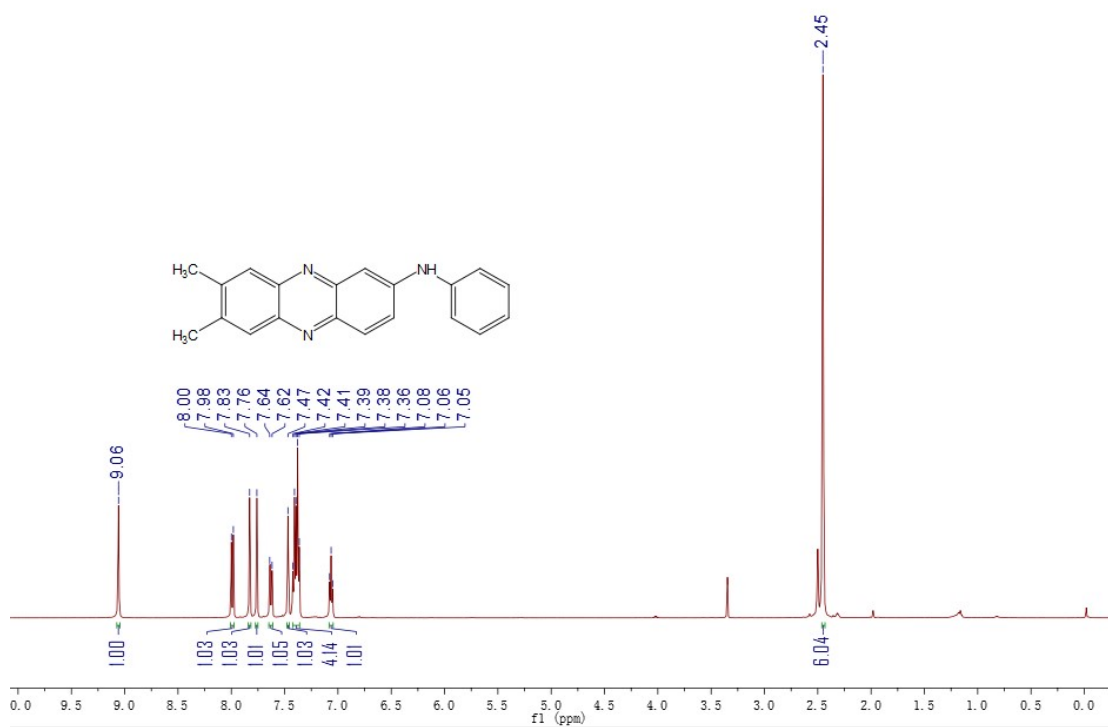

<sup>13</sup>C-NMR (126 MHz, DMSO-*d*<sub>6</sub>) spectrum of C37

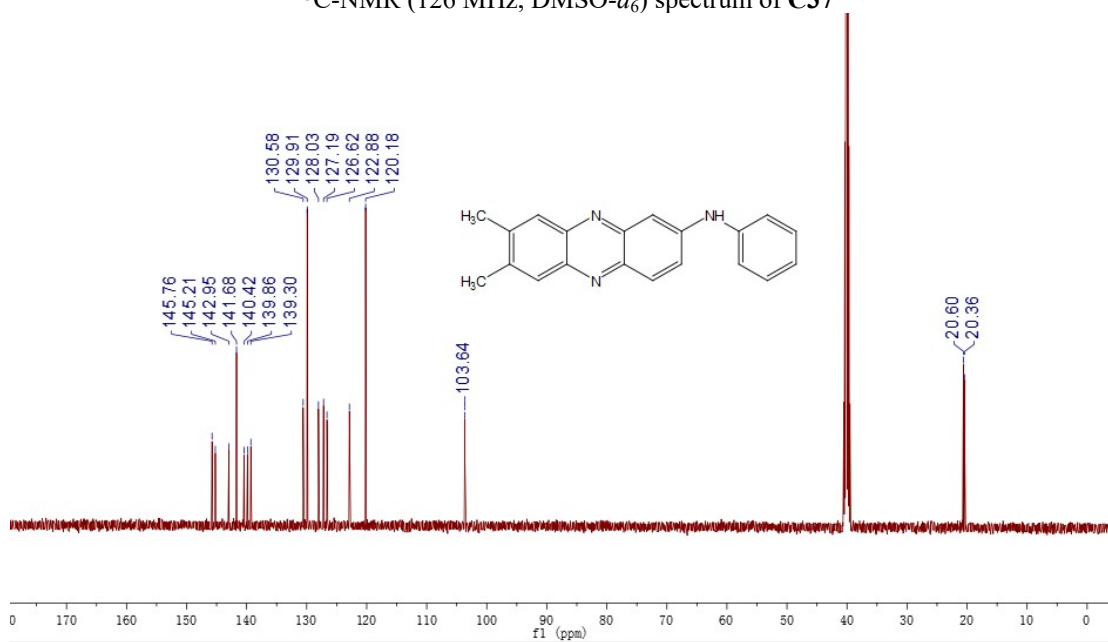

<sup>1</sup>H-NMR (400 MHz, CDCl<sub>3</sub>) spectrum of C38

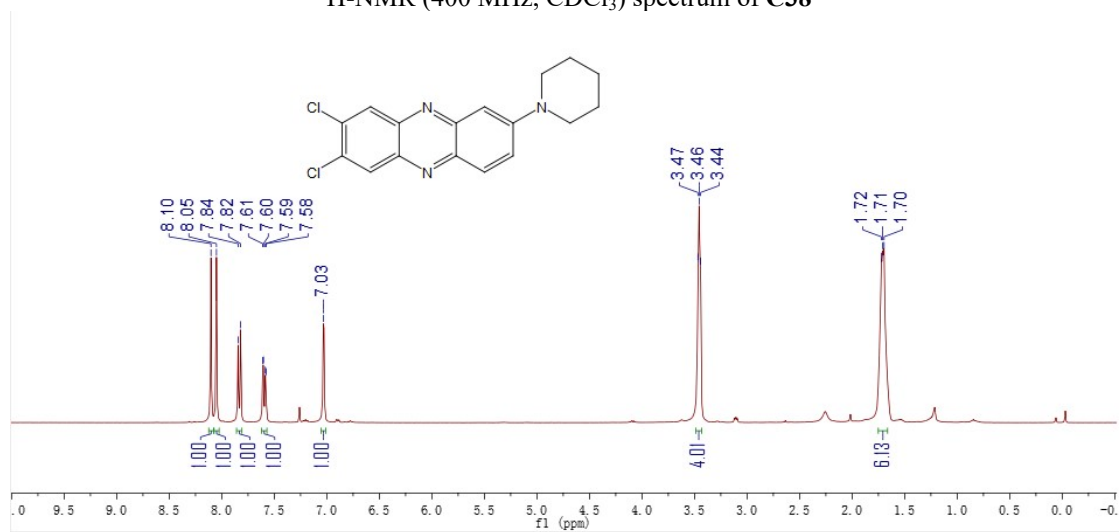

<sup>13</sup>C-NMR (101 MHz, CDCl<sub>3</sub>) spectrum of C38

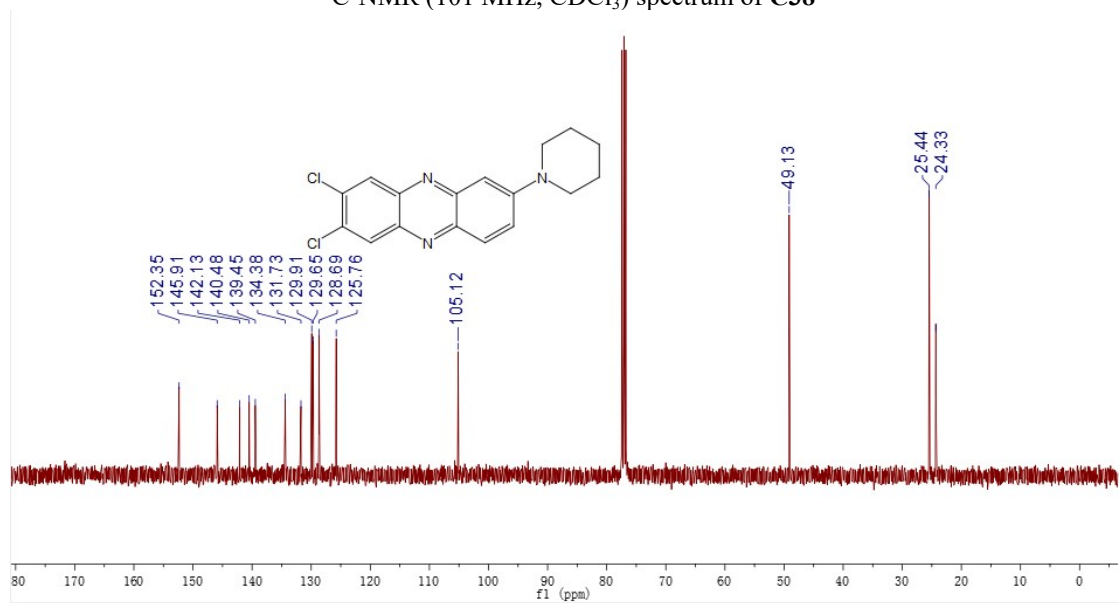

<sup>1</sup>H-NMR (500 MHz, CDCl<sub>3</sub>) spectrum of C39

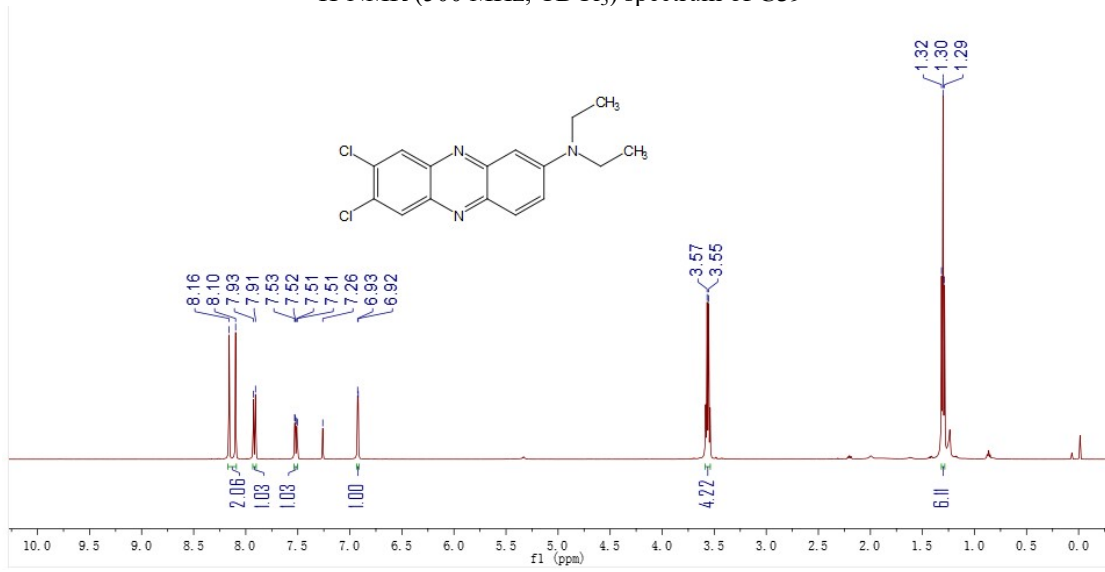

<sup>13</sup>C-NMR (126 MHz, CDCl<sub>3</sub>) spectrum of C39

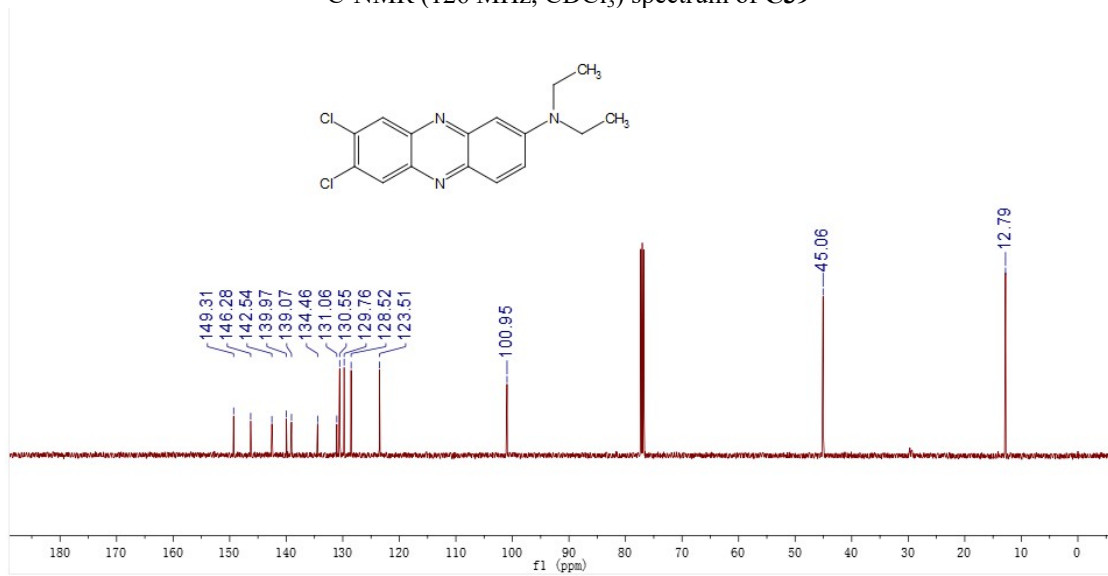

<sup>1</sup>H-NMR (500 MHz, DMSO-*d*<sub>6</sub>) spectrum of C40

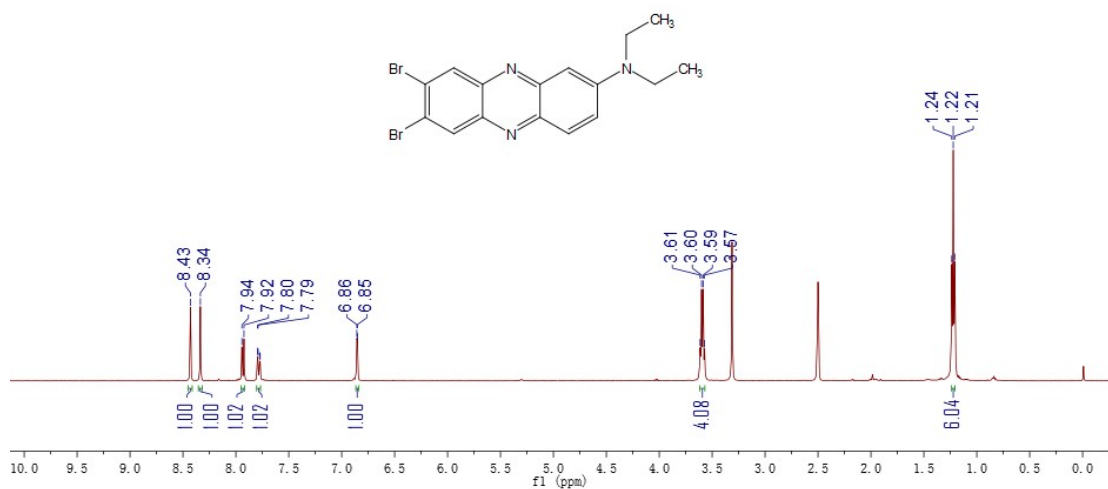

<sup>13</sup>C-NMR (126 MHz, DMSO-*d*<sub>6</sub>) spectrum of C40

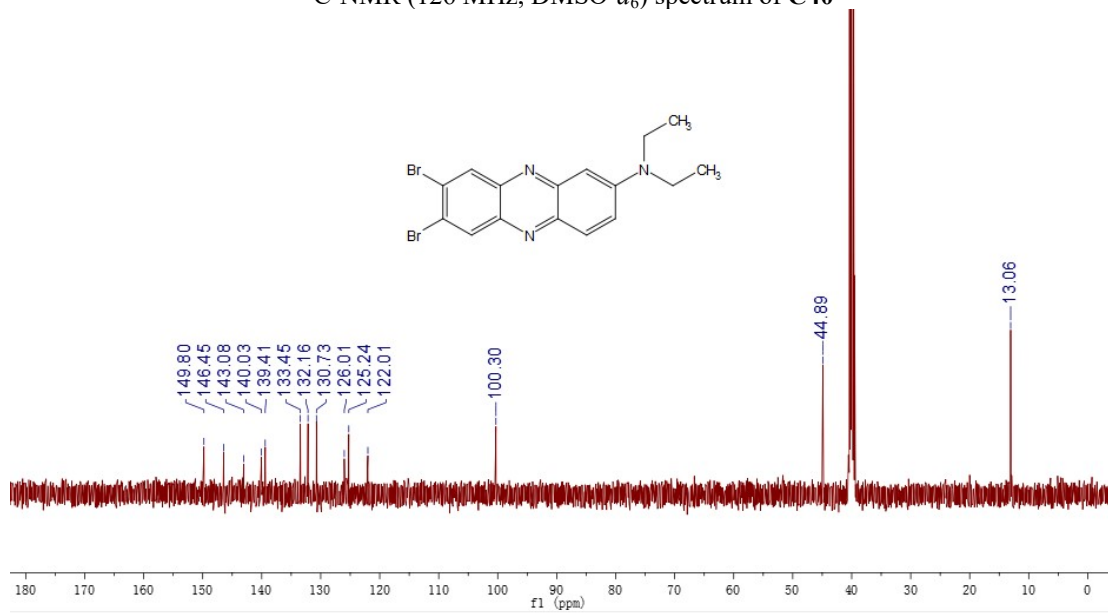



<sup>1</sup>H-NMR (500 MHz, DMSO-*d*<sub>6</sub>) spectrum of C41

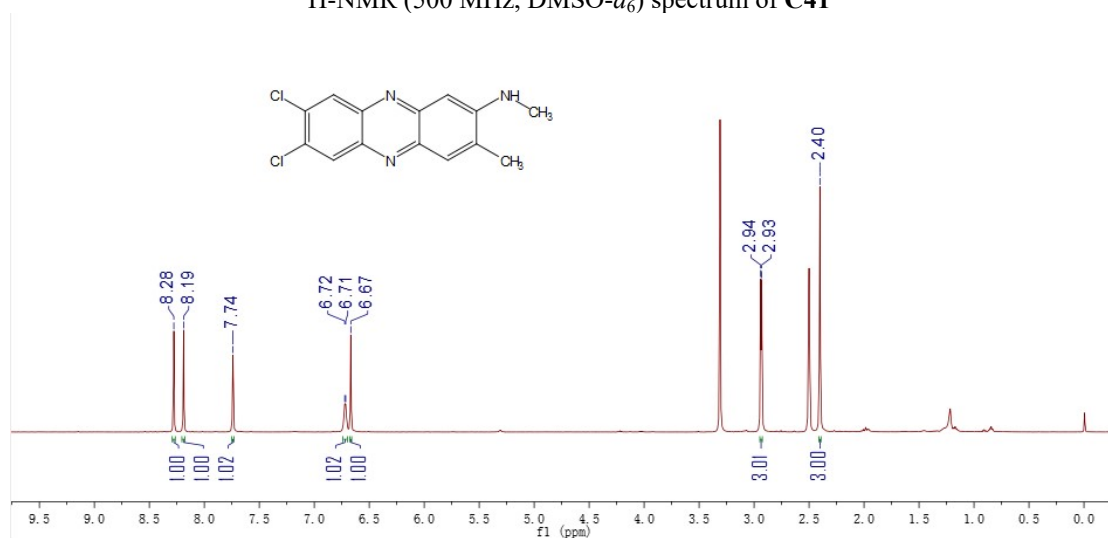

<sup>13</sup>C-NMR (126 MHz, DMSO-*d*<sub>6</sub>) spectrum of C41

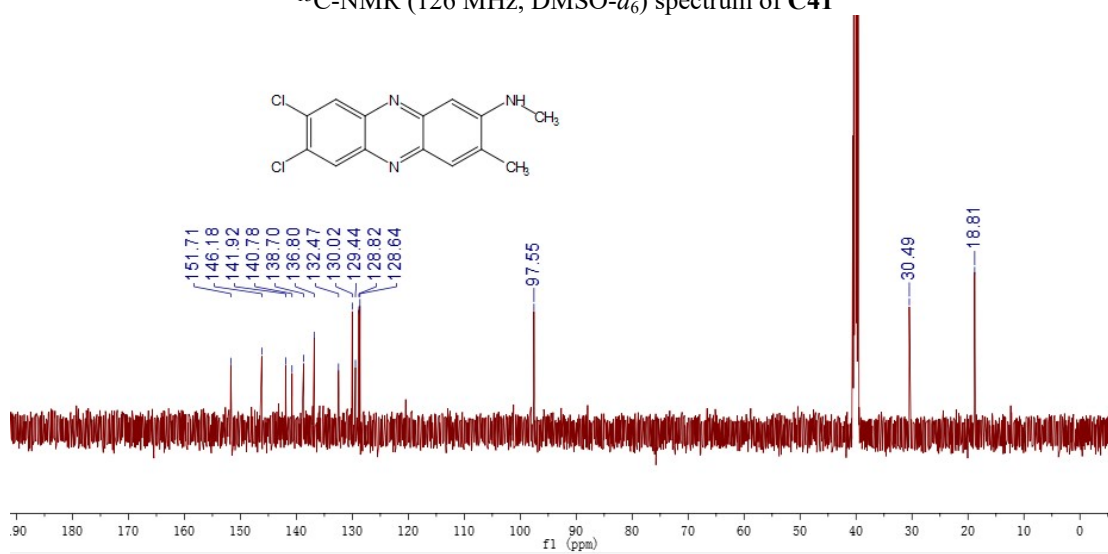

<sup>1</sup>H-NMR (400 MHz, CDCl<sub>3</sub>) spectrum of C42

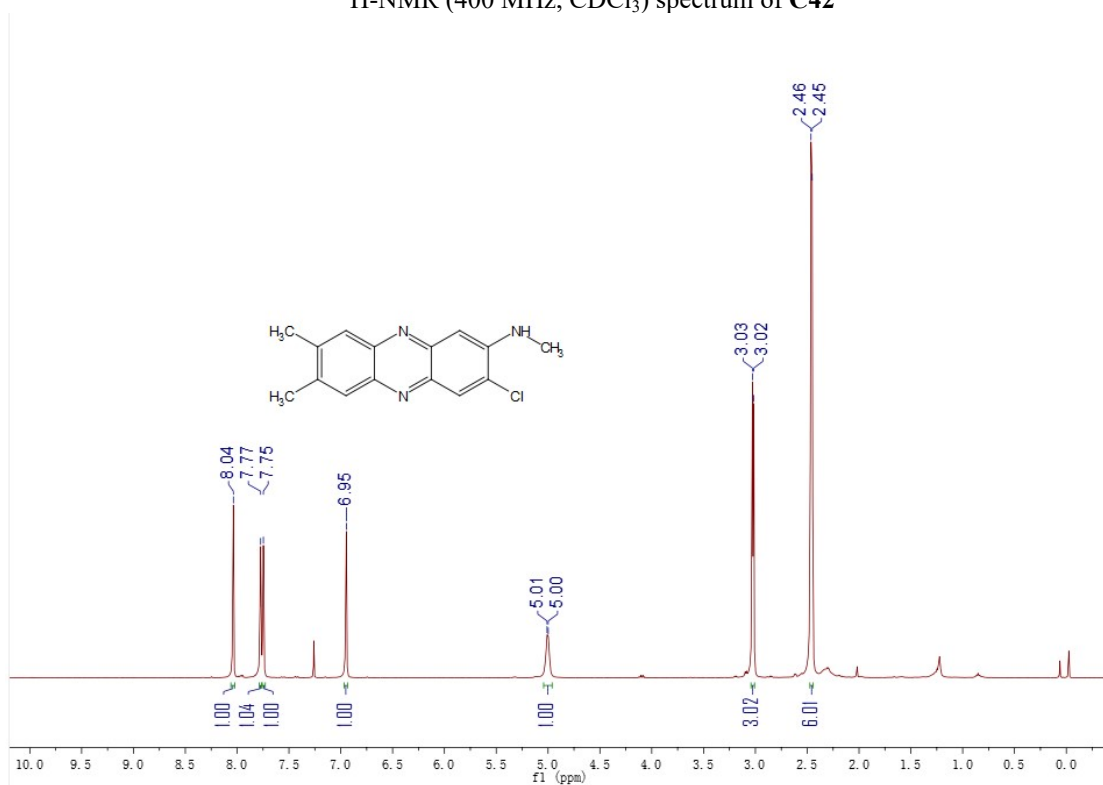

<sup>13</sup>C-NMR (101 MHz, CDCl<sub>3</sub>) spectrum of C42

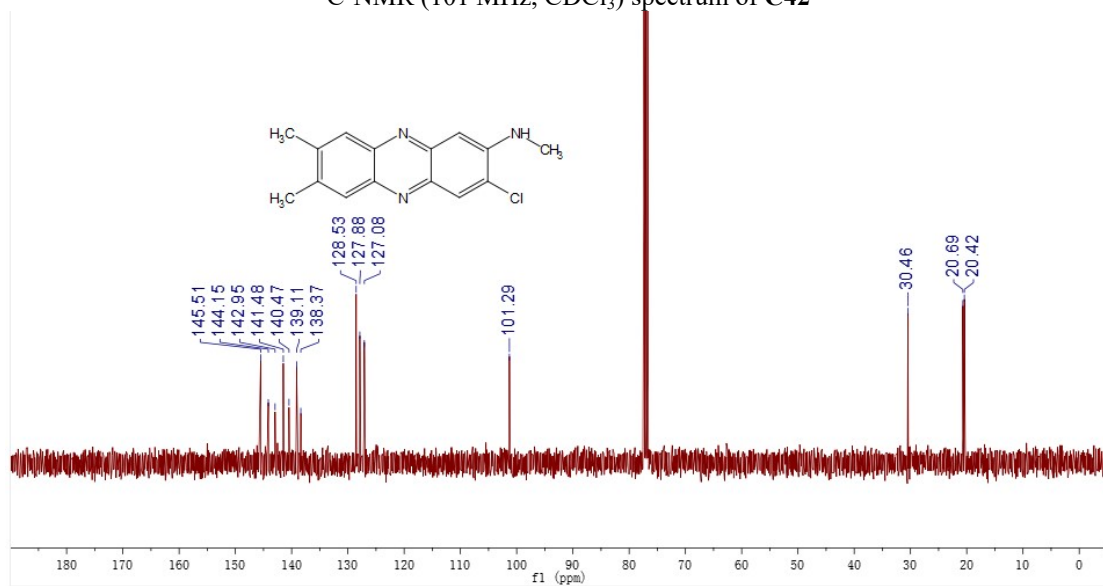

<sup>1</sup>H-NMR (400 MHz, CDCl<sub>3</sub>) spectrum of C43

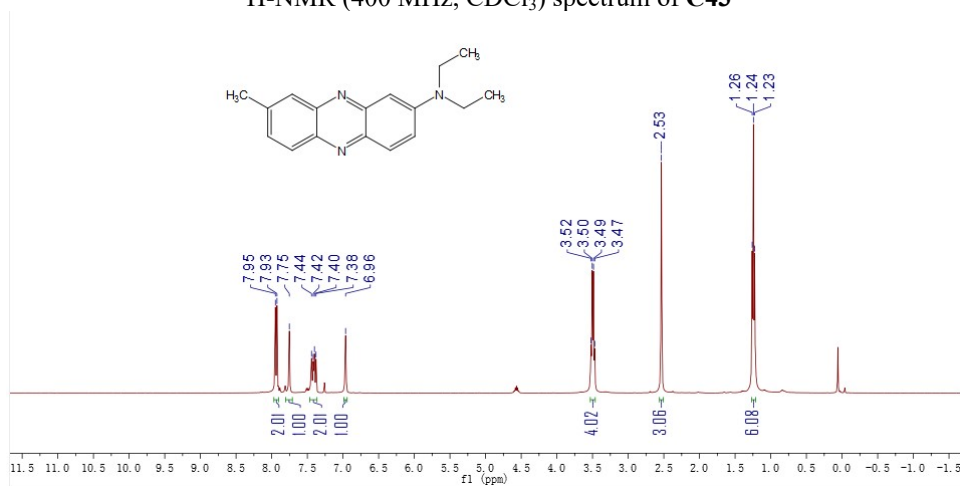

<sup>13</sup>C-NMR (101 MHz, CDCl<sub>3</sub>) spectrum of C43

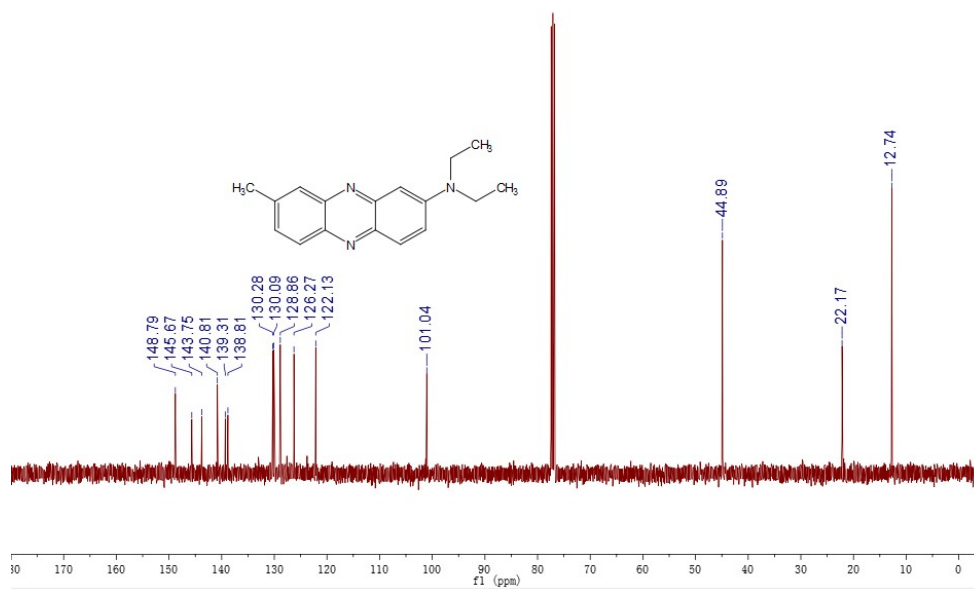

<sup>1</sup>H-NMR (400 MHz, CDCl<sub>3</sub>) spectrum of C44

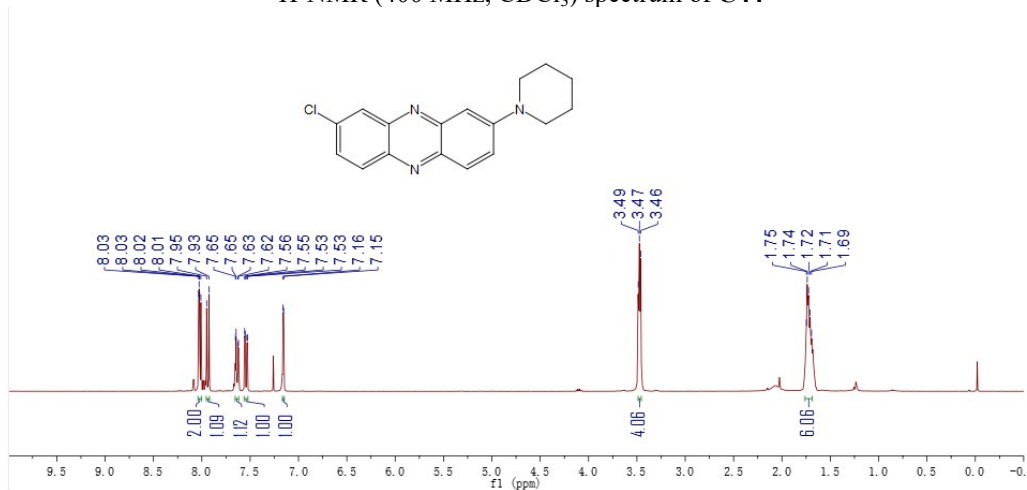

<sup>13</sup>C-NMR (101 MHz, CDCl<sub>3</sub>) spectrum of C44

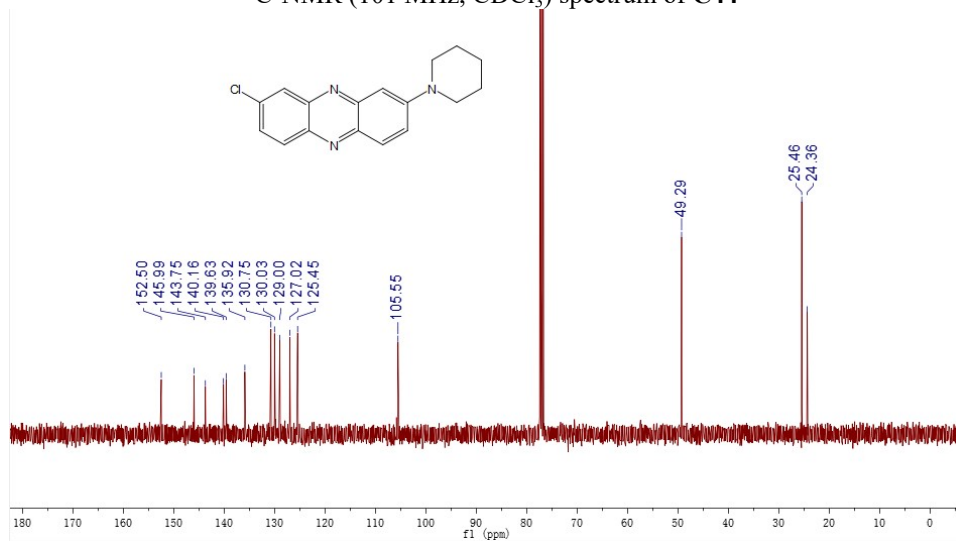

<sup>1</sup>H-NMR (500 MHz, DMSO-*d*<sub>6</sub>) spectrum of C45

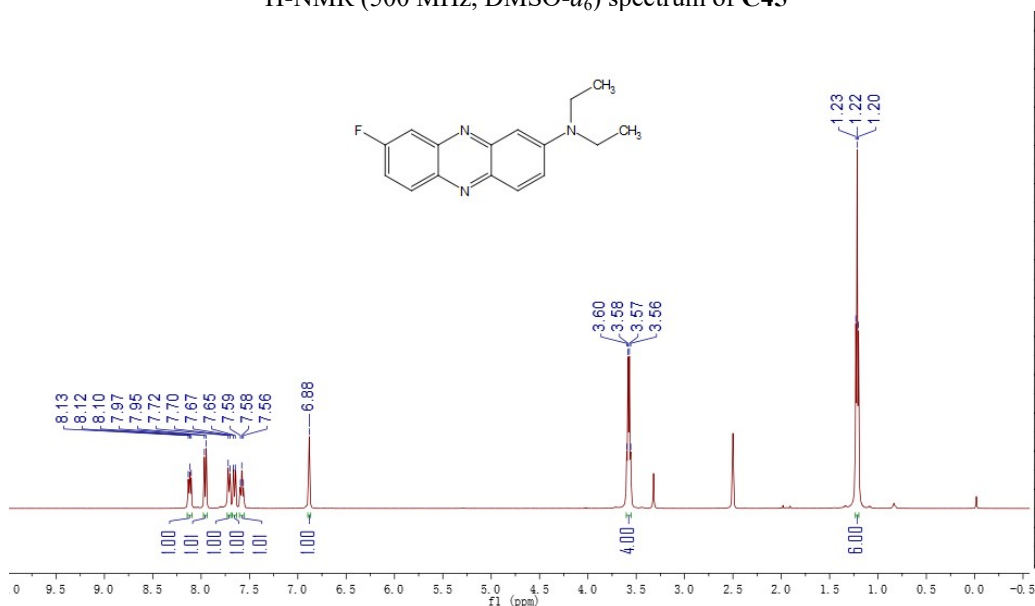

<sup>13</sup>C-NMR (126 MHz, DMSO-*d*<sub>6</sub>) spectrum of C45

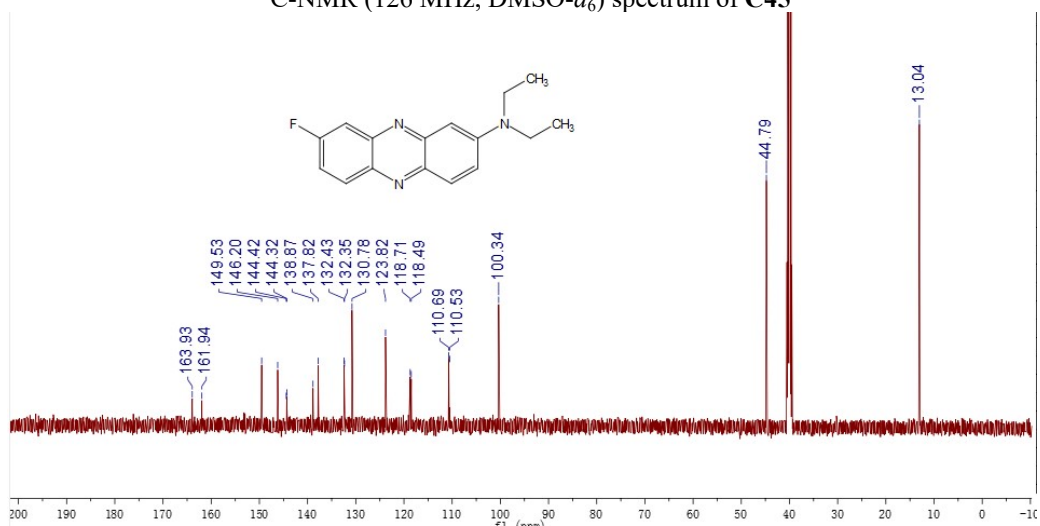

<sup>19</sup>F-NMR (471 MHz, CDCl<sub>3</sub>) spectrum of C45

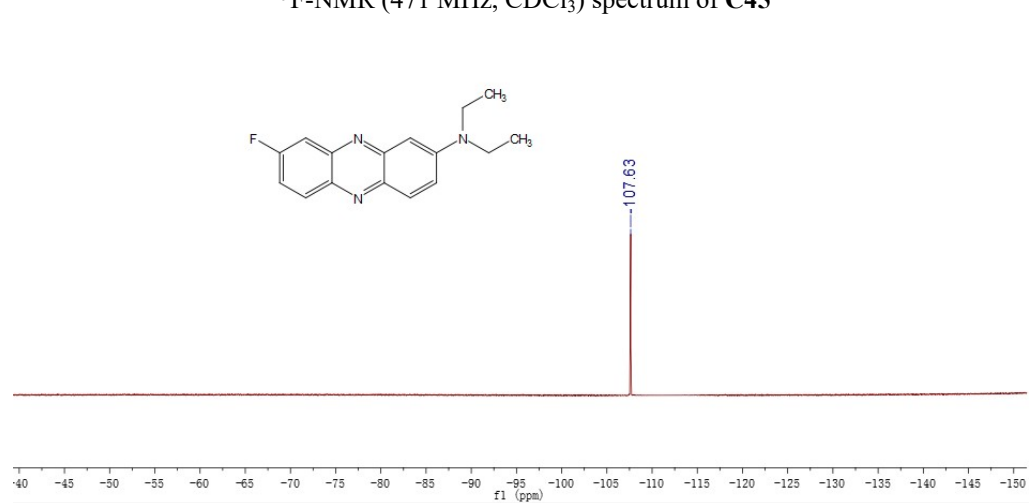

<sup>1</sup>H-NMR (400 MHz, CDCl<sub>3</sub>) spectrum of C46

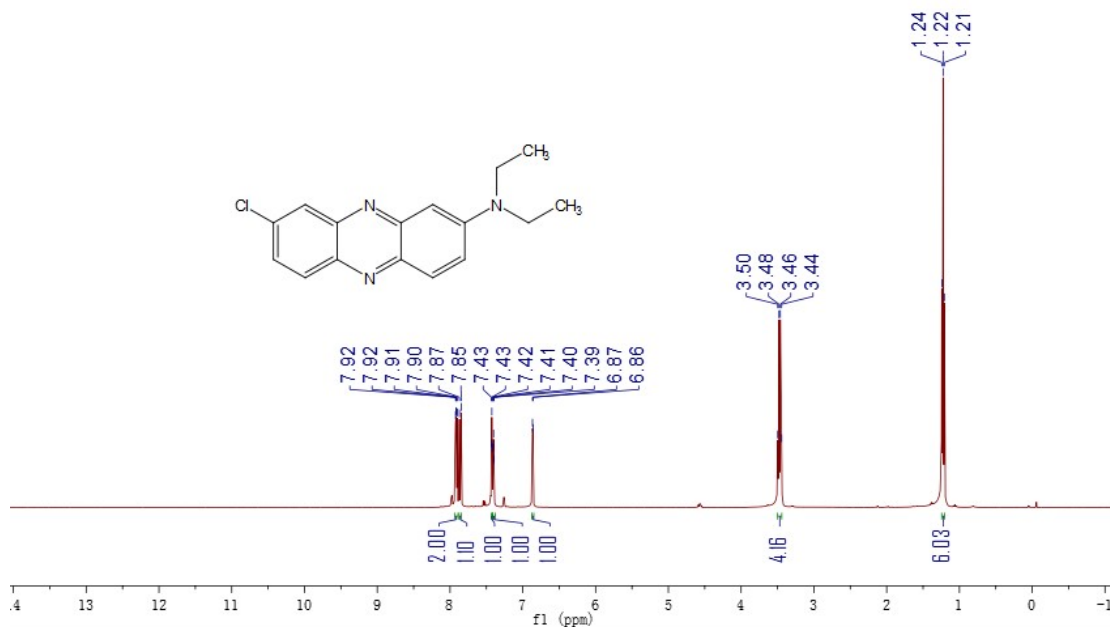

<sup>13</sup>C-NMR (101 MHz, CDCl<sub>3</sub>) spectrum of C46

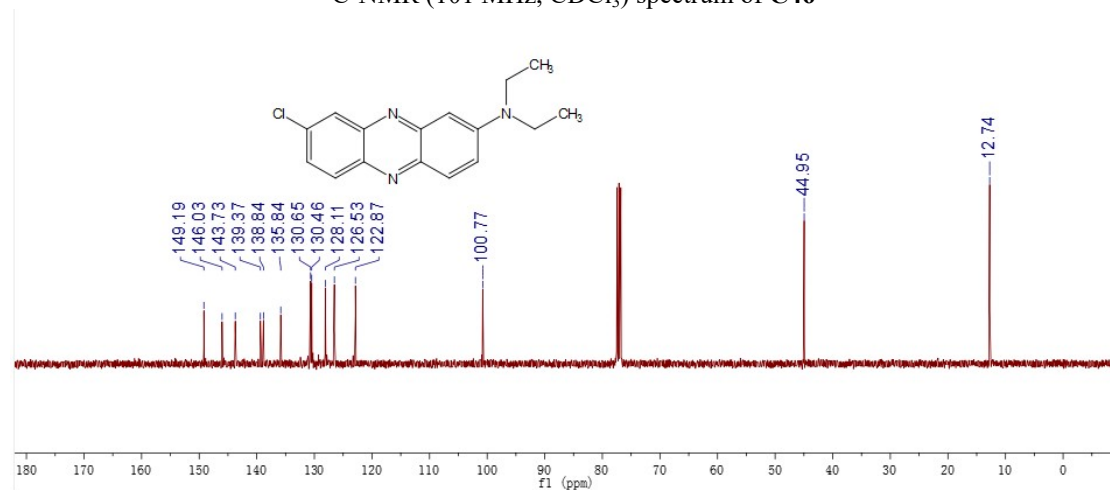

<sup>1</sup>H-NMR (400 MHz, CDCl<sub>3</sub>) spectrum of C47

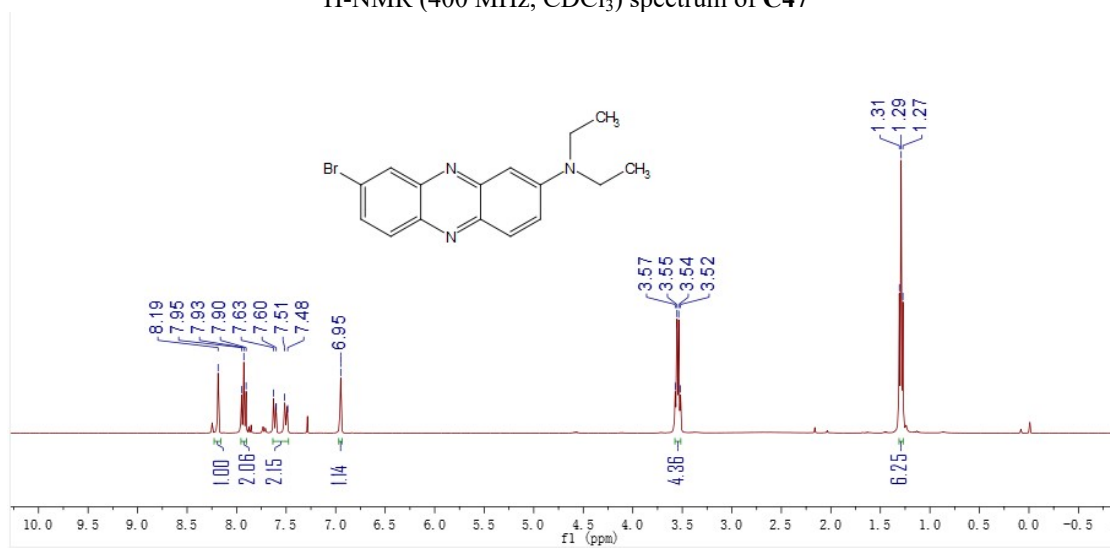

<sup>13</sup>C-NMR (101 MHz, CDCl<sub>3</sub>) spectrum of C47

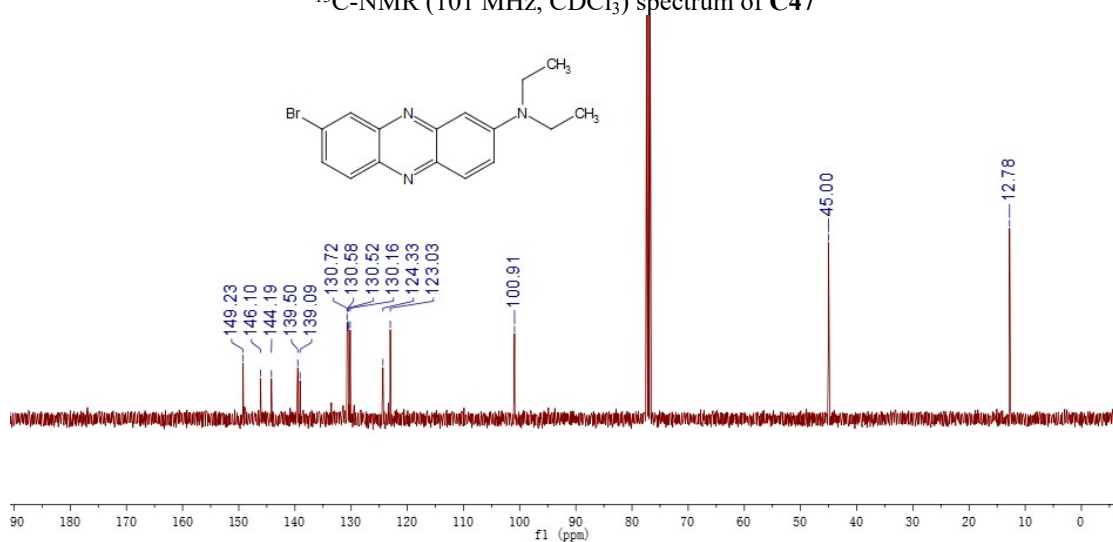

<sup>1</sup>H-NMR (500 MHz, DMSO-*d*<sub>6</sub>) spectrum of C48

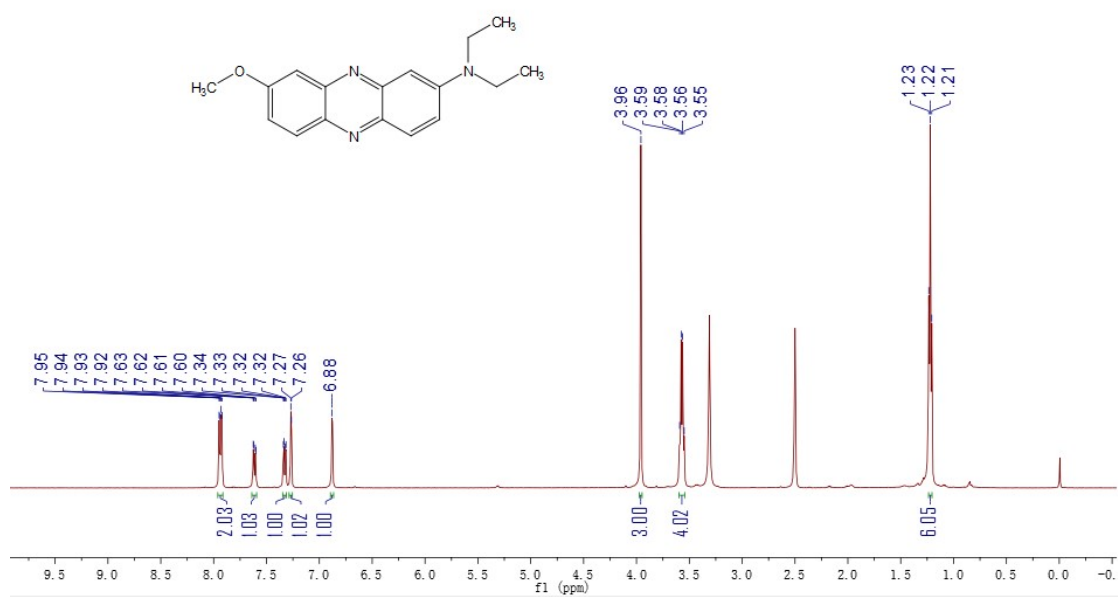

<sup>13</sup>C-NMR (126 MHz, DMSO-*d*<sub>6</sub>) spectrum of C48

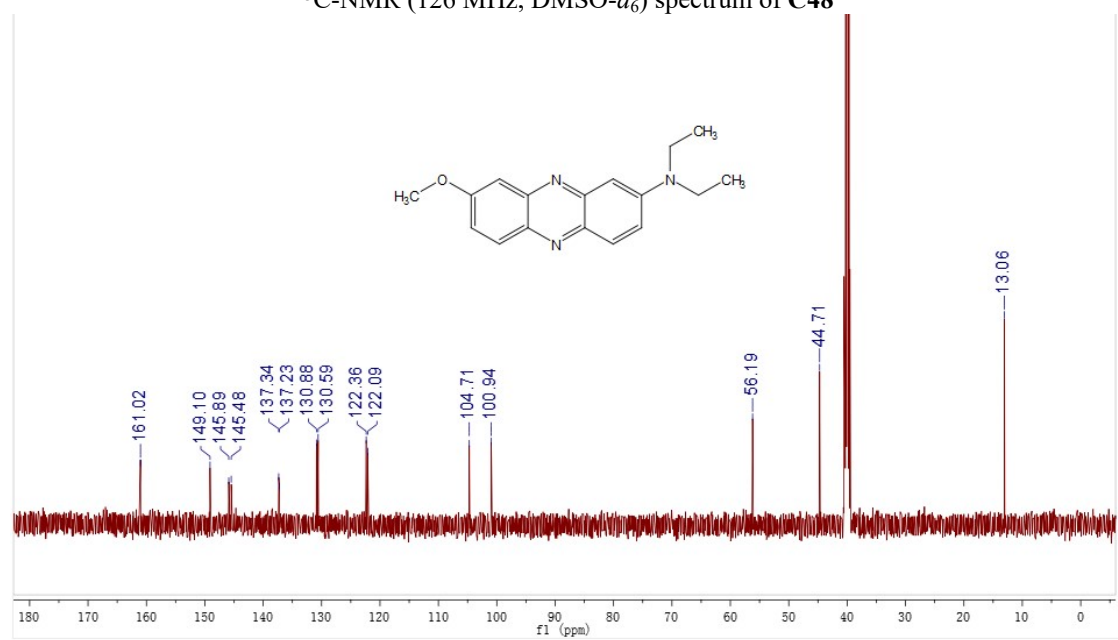



<sup>1</sup>H-NMR (500 MHz, CDCl<sub>3</sub>) spectrum of C49

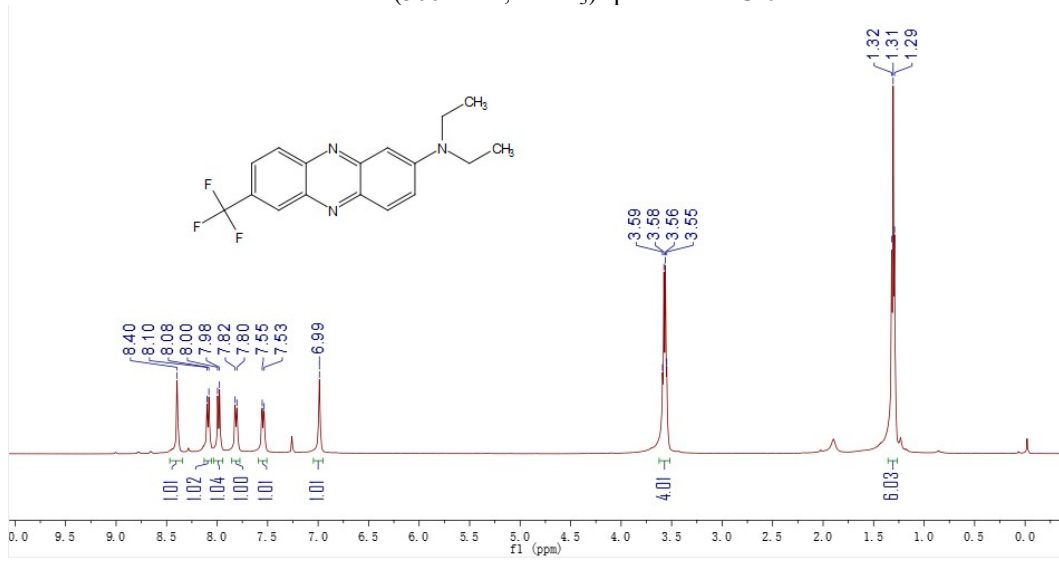

<sup>13</sup>C-NMR (101 MHz, CDCl<sub>3</sub>) spectrum of C49

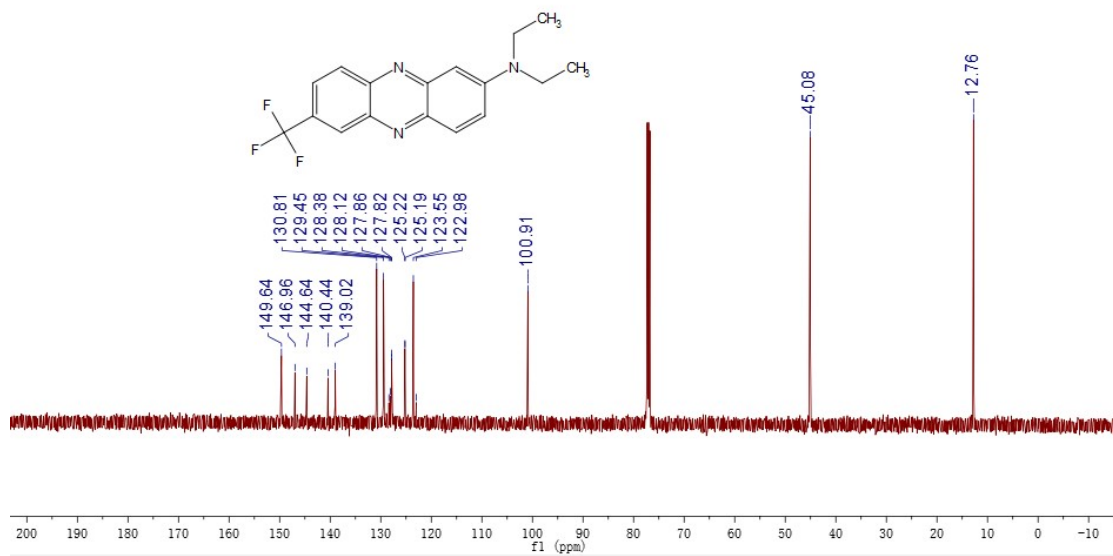

<sup>19</sup>F-NMR (471 MHz, CDCl<sub>3</sub>) spectrum of C49

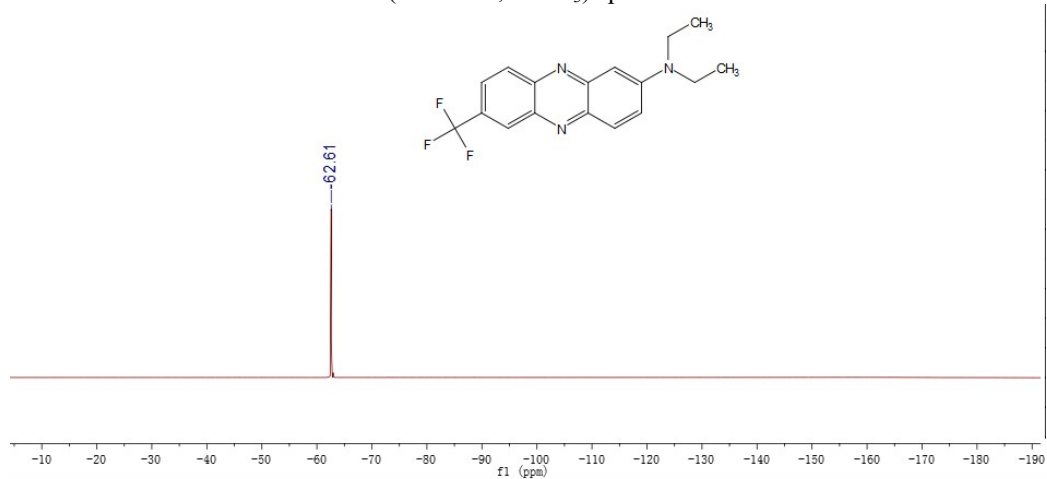

<sup>1</sup>H-NMR (500 MHz, CDCl<sub>3</sub>) spectrum of **C49'**

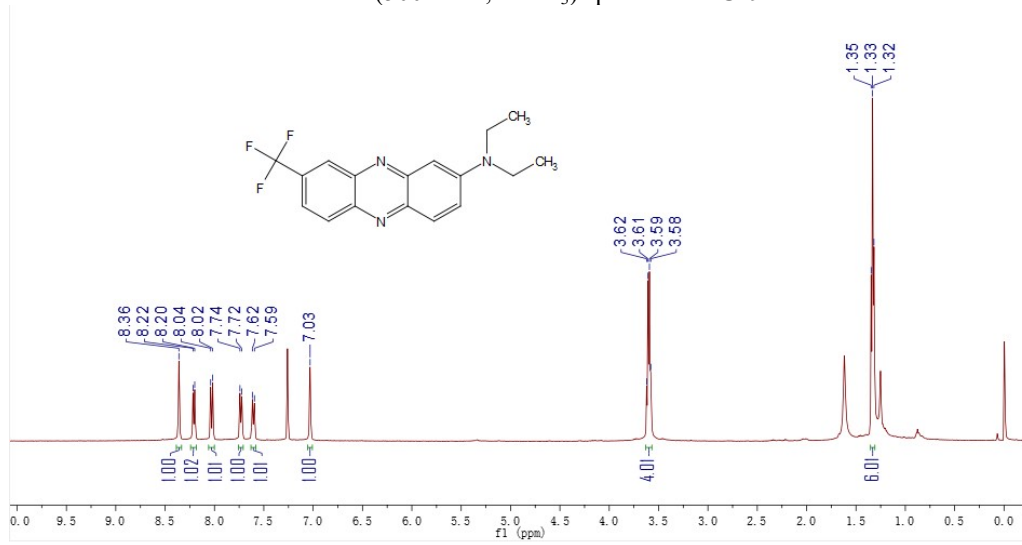

<sup>13</sup>C-NMR (101 MHz, CDCl<sub>3</sub>) spectrum of **C49'**

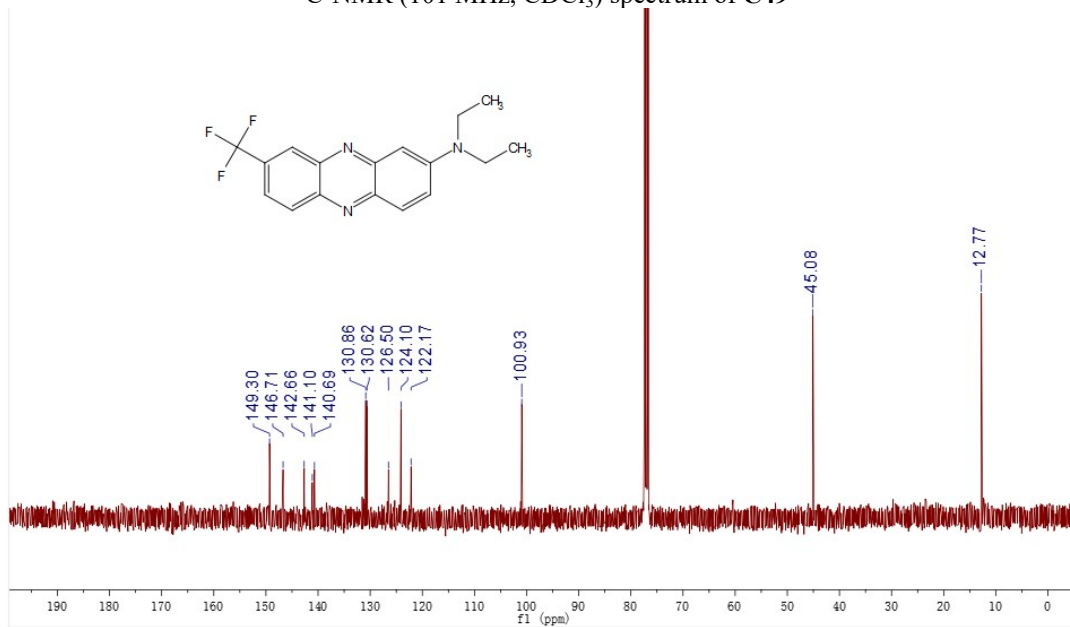

<sup>19</sup>F-NMR (471 MHz, CDCl<sub>3</sub>) spectrum of **C49'**

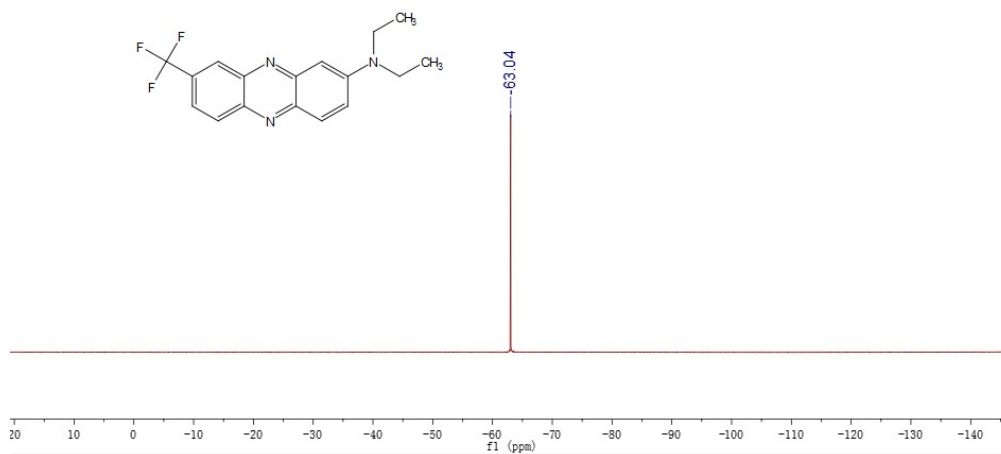

<sup>1</sup>H-NMR (400 MHz, CDCl<sub>3</sub>) spectrum of C50

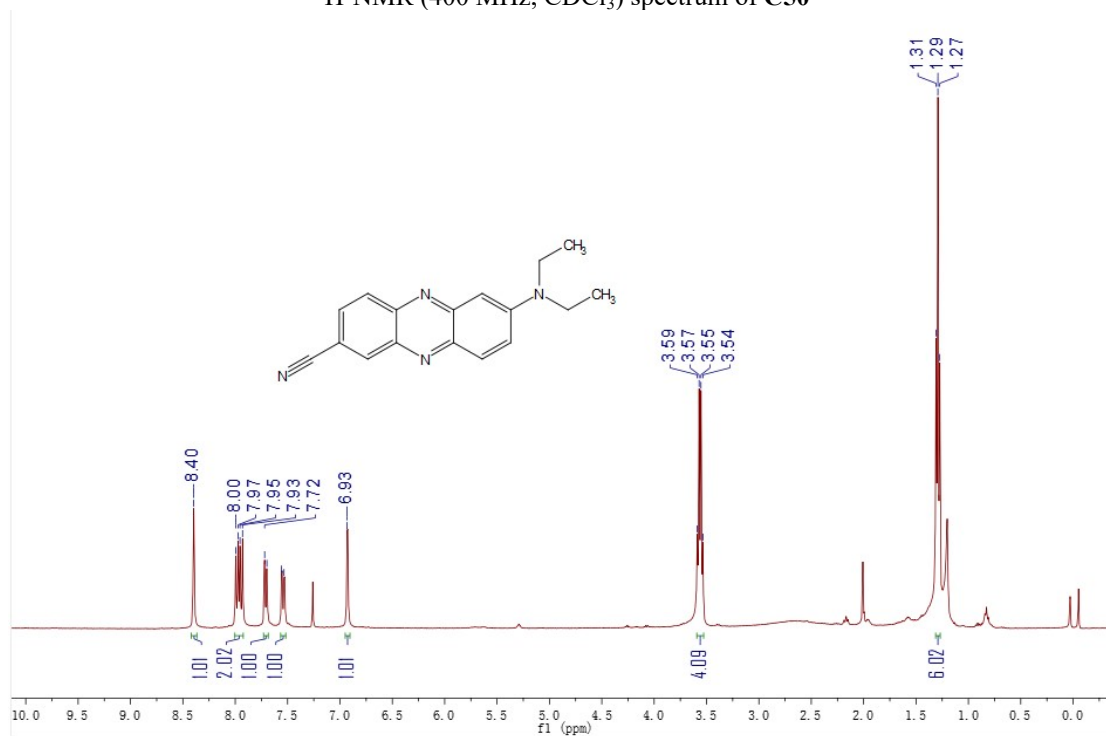

<sup>13</sup>C-NMR (101 MHz, CDCl<sub>3</sub>) spectrum of C50

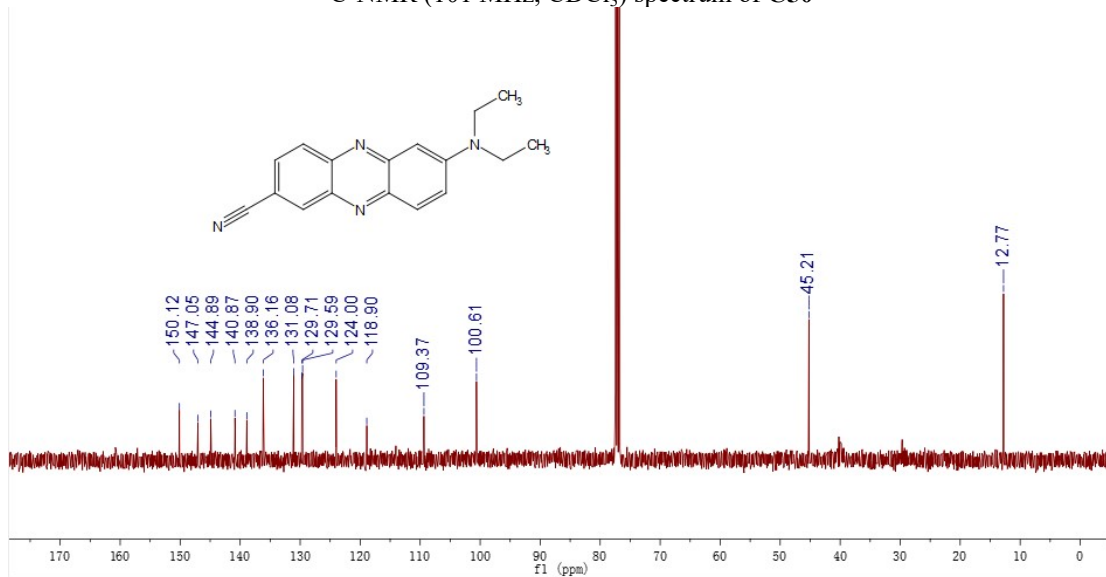

<sup>1</sup>H-NMR (500 MHz, DMSO-*d*<sub>6</sub>) spectrum of C50'

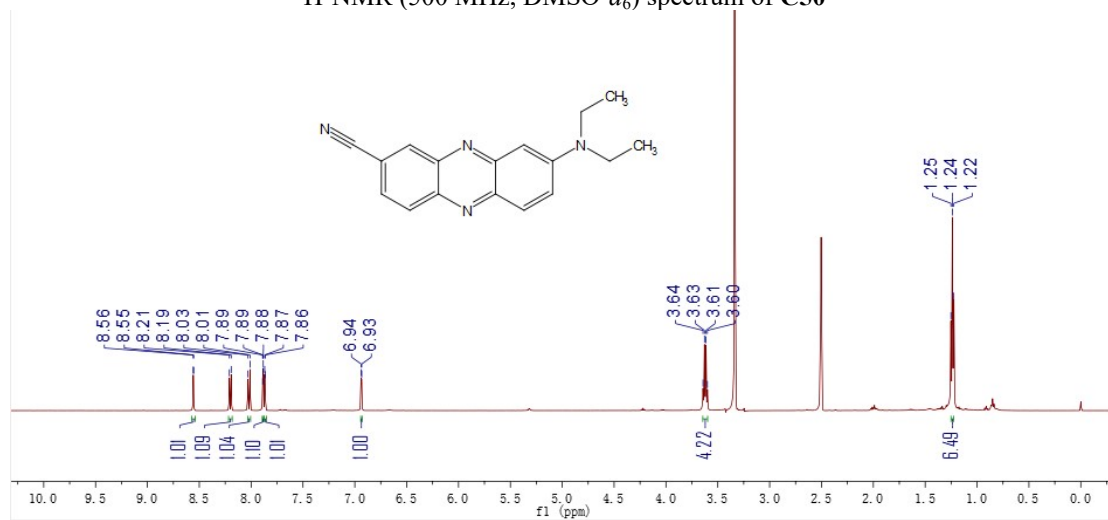

<sup>13</sup>C-NMR (126 MHz, DMSO-*d*<sub>6</sub>) spectrum of C50'

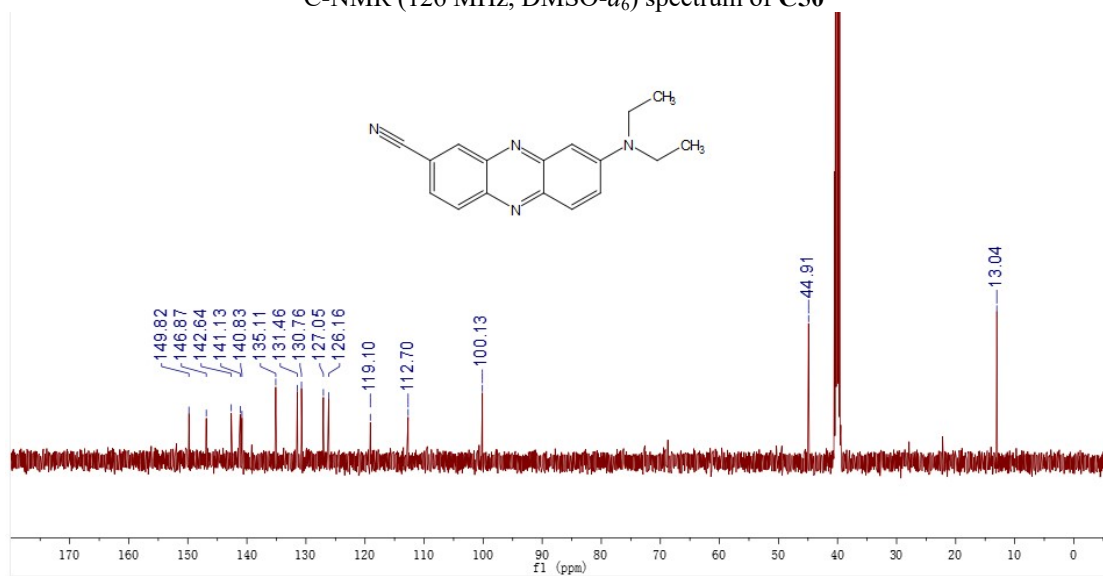

<sup>1</sup>H-NMR (500 MHz, DMSO-*d*<sub>6</sub>) spectrum of C13-1

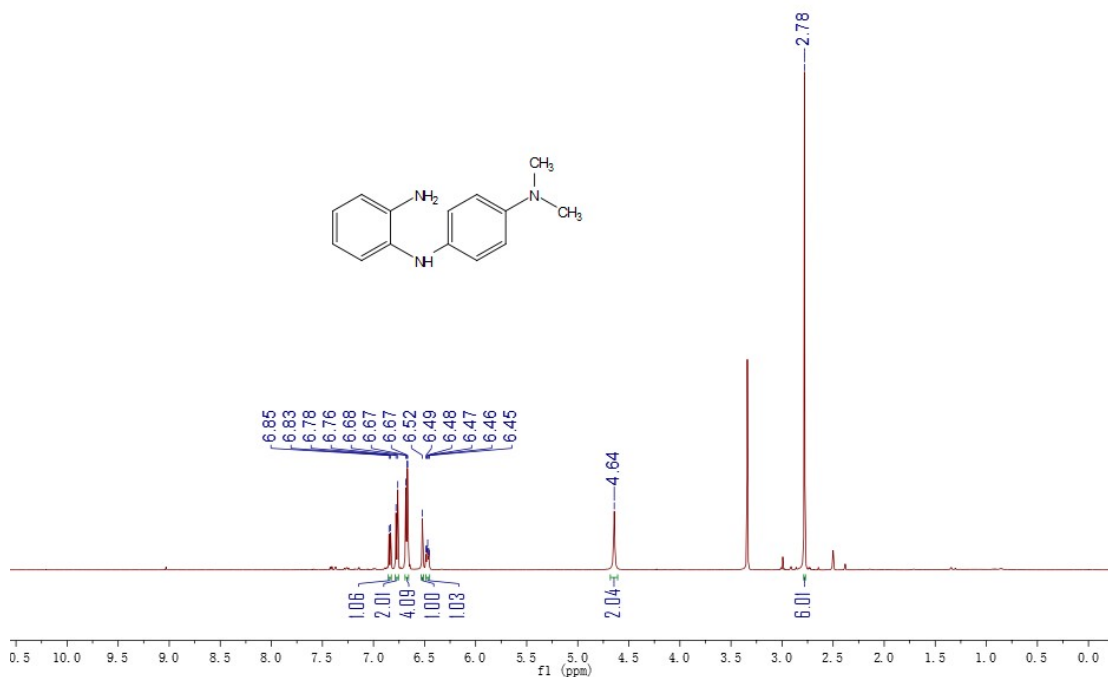

<sup>13</sup>C-NMR (126 MHz, DMSO-*d*<sub>6</sub>) spectrum of C13-1

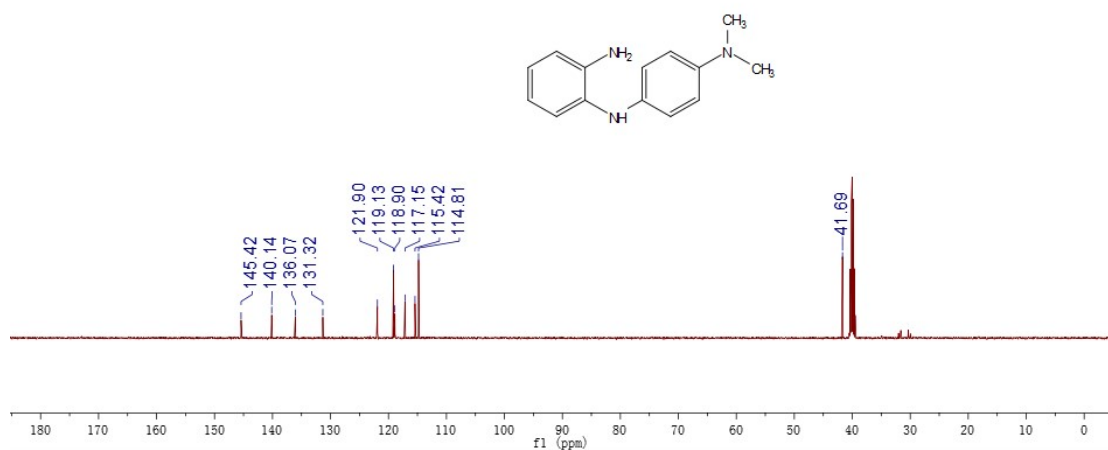

<sup>1</sup>H-NMR (500 MHz, DMSO-*d*<sub>6</sub>) spectrum of C51

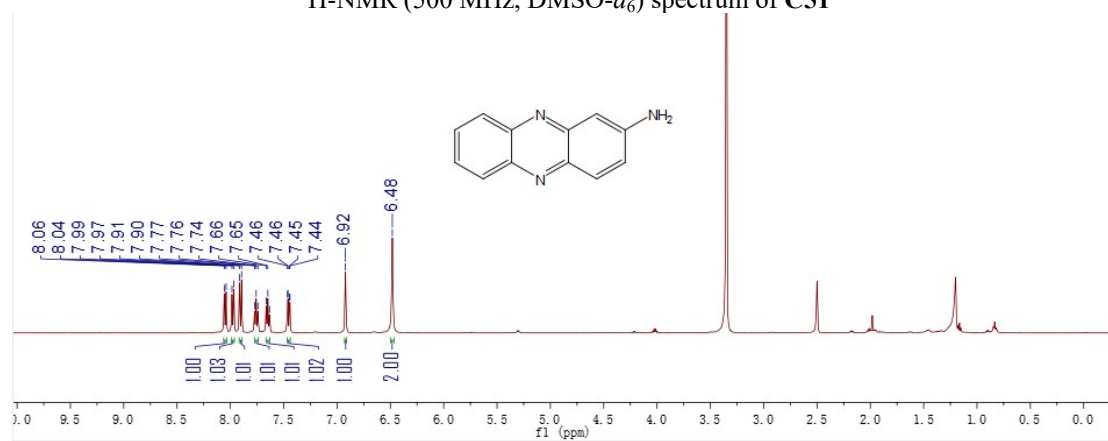

<sup>13</sup>C-NMR (126 MHz, DMSO-*d*<sub>6</sub>) spectrum of C51

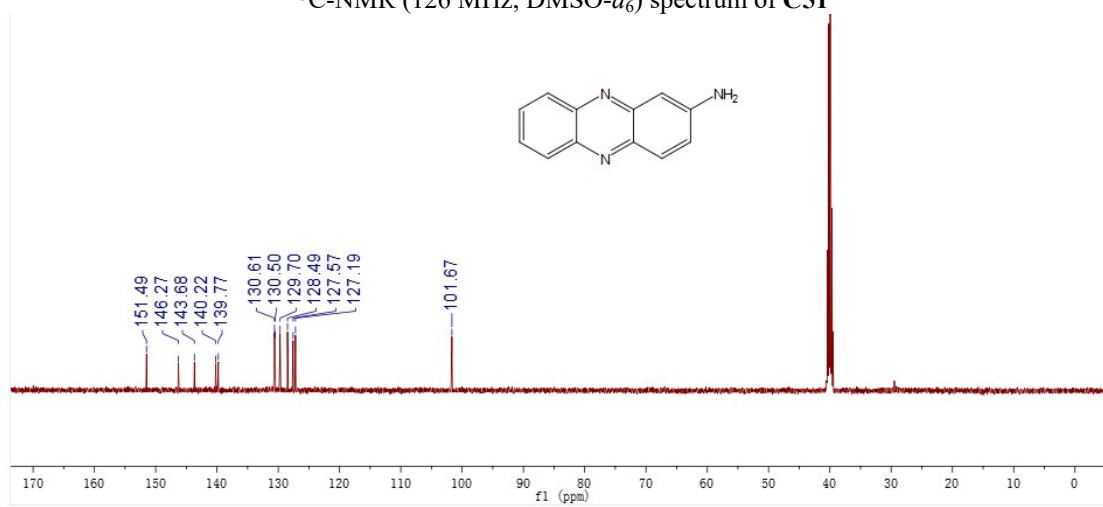

$^1\text{H-NMR}$  (500 MHz,  $\text{DMSO-}d_6$ ) spectrum of **C52**

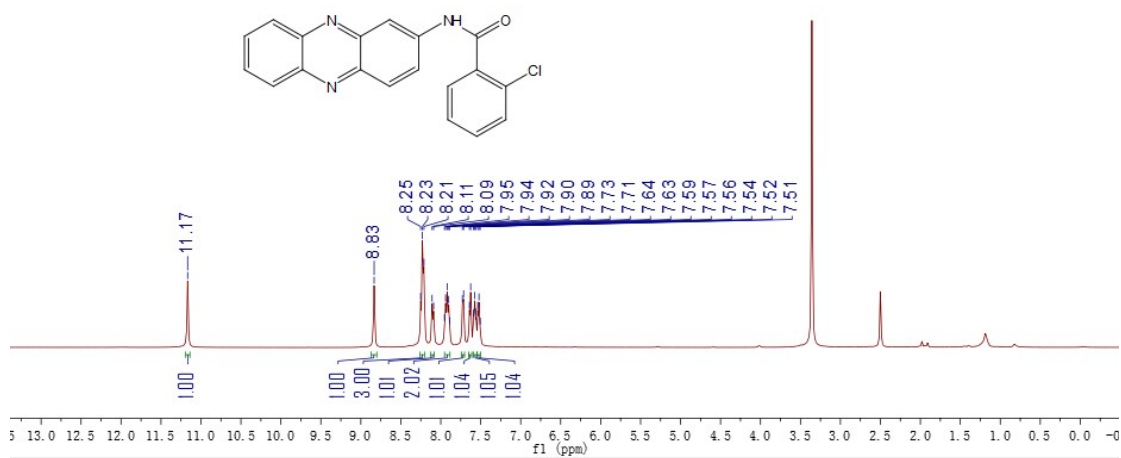

$^{13}\text{C-NMR}$  (126 MHz,  $\text{DMSO-}d_6$ ) spectrum of **C52**

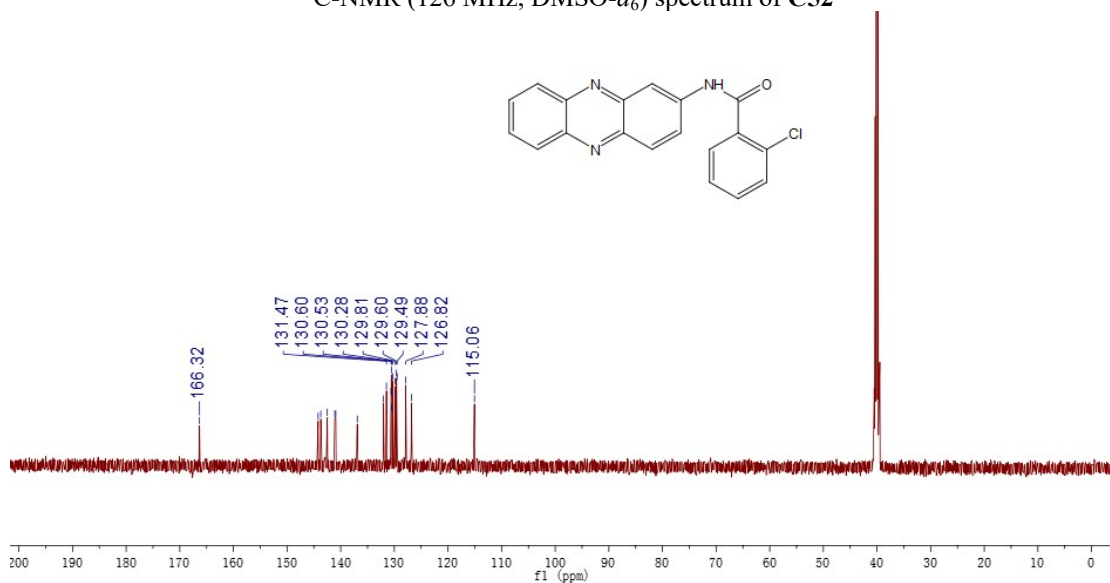

<sup>1</sup>H-NMR (500 MHz, DMSO-*d*<sub>6</sub>) spectrum of C53

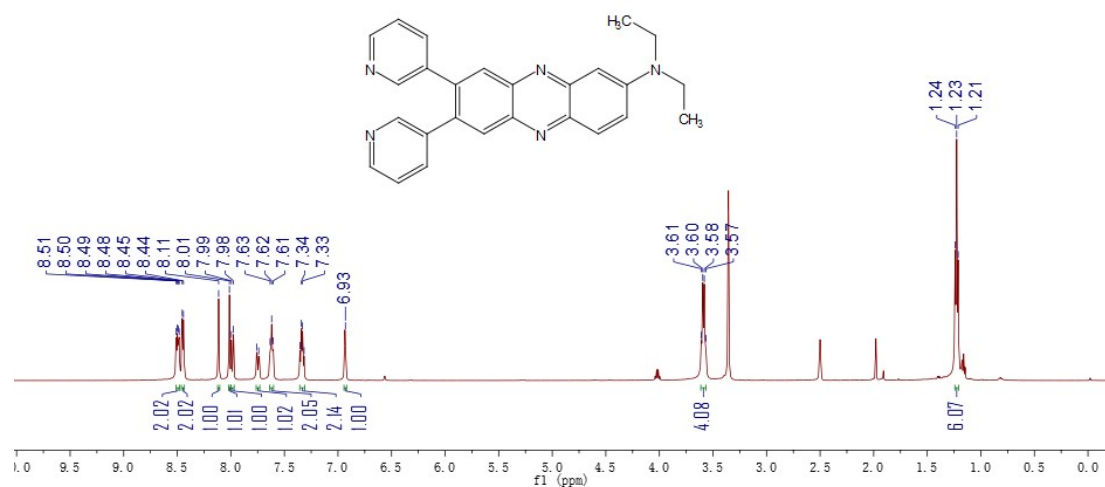

<sup>13</sup>C-NMR (126 MHz, DMSO-*d*<sub>6</sub>) spectrum of C53

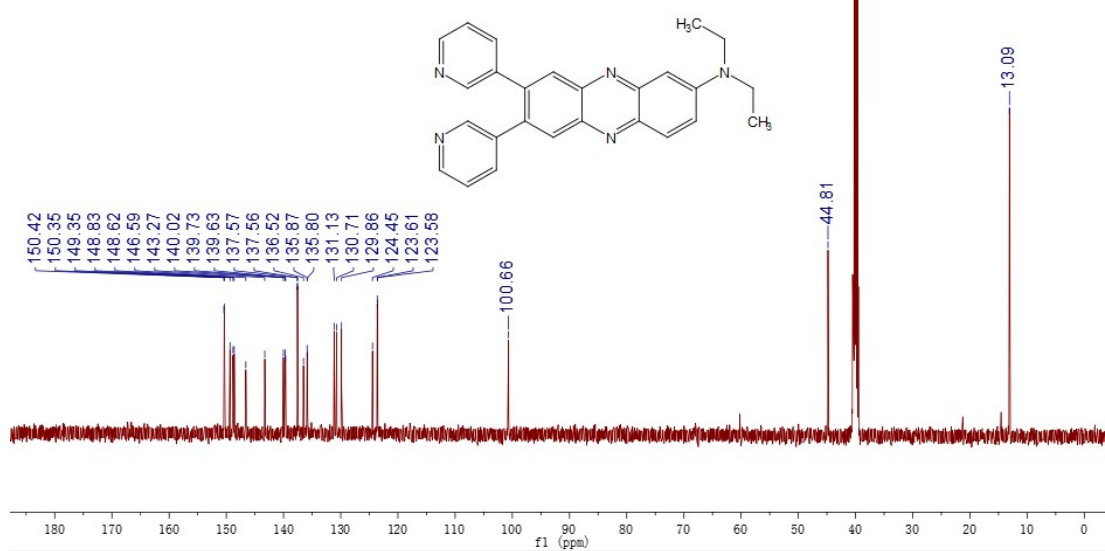



## 8. HR-MS spectra of the obtained compounds

HR-MS spectrum of C1

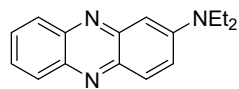

27 #17 RT: 0.19 AV: 1 NL: 6.66E7  
T: FTMS + cAPCI corona Full ms [50.0000-750.0000]

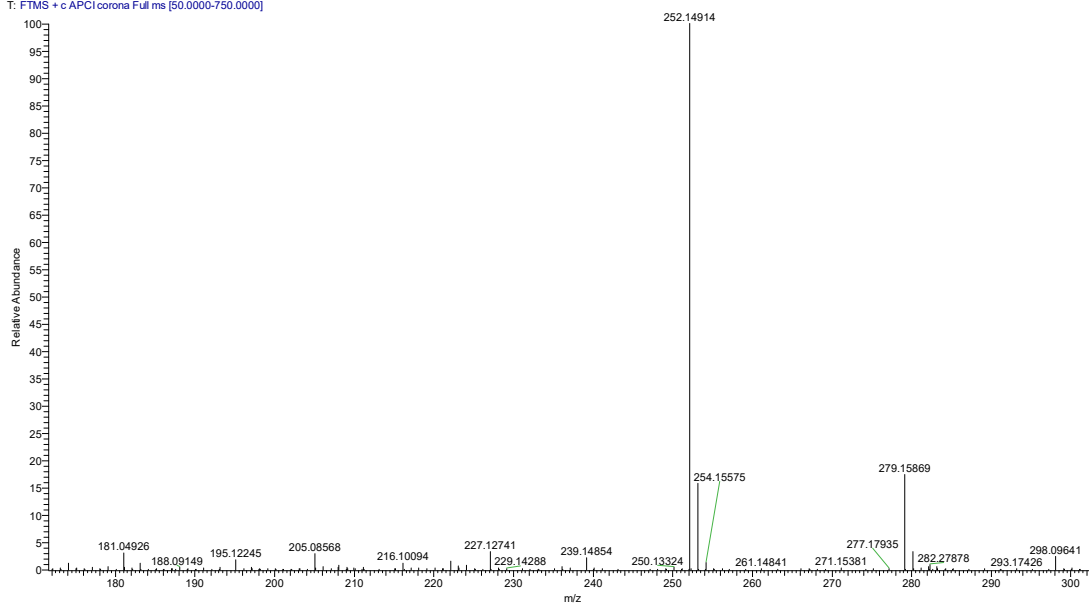

Chemical formula  C16H17N3

Peptide/Protein

Plus H2O  252.1495241 amu

Adduct

Identity H

Concentration One

Charge distribution

Most abundant : 1

# HR-MS spectrum of C2

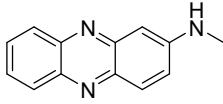

1 #17 RT: 0.19 AV: 1 NL: 8.87E8  
T: FTMS + cAPCI corona Full ms [50.0000-750.0000]

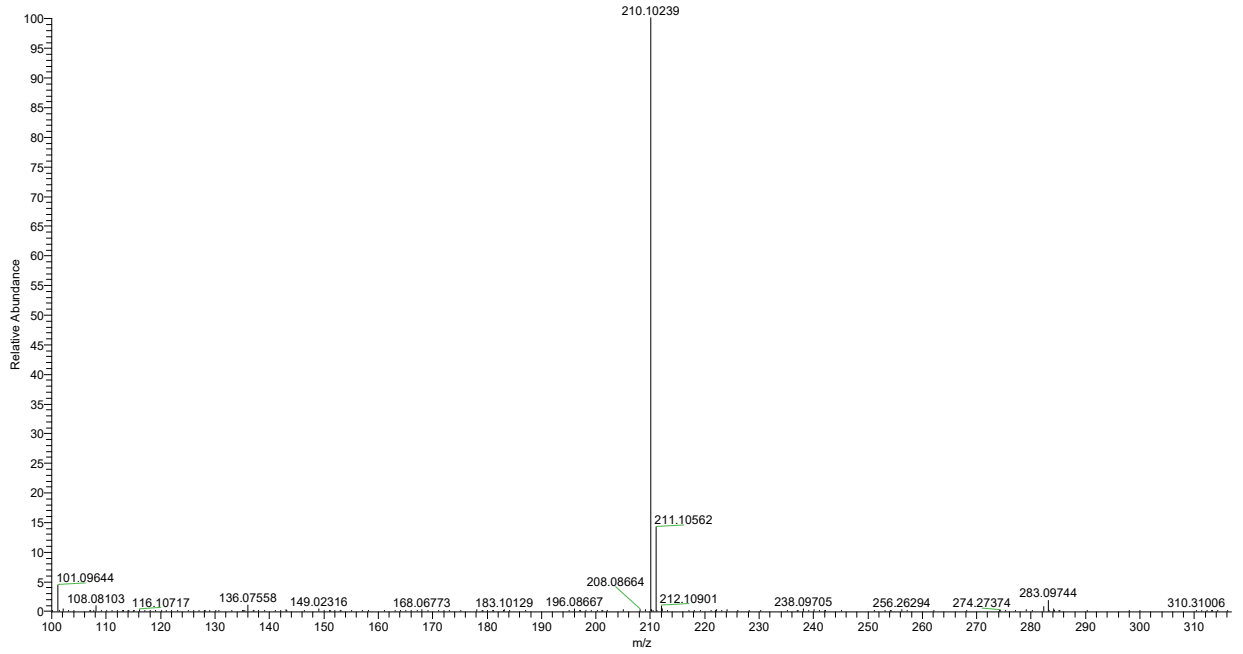

Chemical fomula  C13H11N3

Peptide/Protein

Plus H2O  210.1025740 amu

Adduct

Identity H

Concentration One

Charge distribution

Most abundant : 1

# HR-MS spectrum of C3

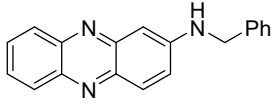

28 #15 RT: 0.17 AV: 1 NL: 3.69E7  
T: FTMS + c APC1 corona Full ms [50.0000-750.0000]

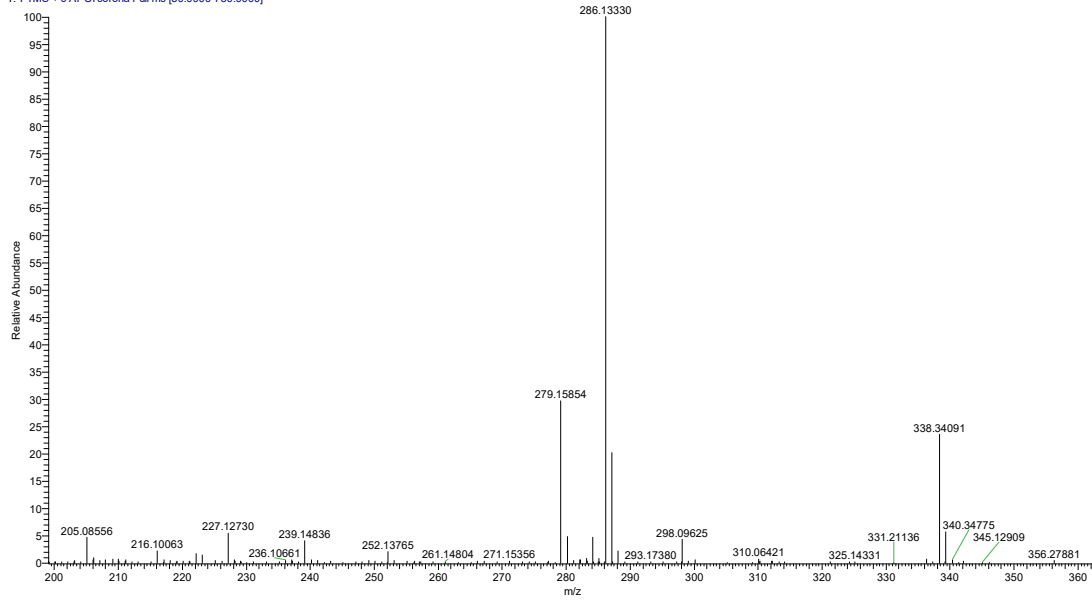

Chemical formula  C19H15N3

Peptide/Protein

Plus H2O  286.1338741 amu

Adduct

Identity H

Concentration One

Charge distribution

Most abundant : 1

# HR-MS spectrum of C4

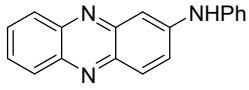

2 #19 RT: 0.22 AV: 1 NL: 1.95E7  
T: FTMS + c APCI corona Full ms [50.0000-750.0000]

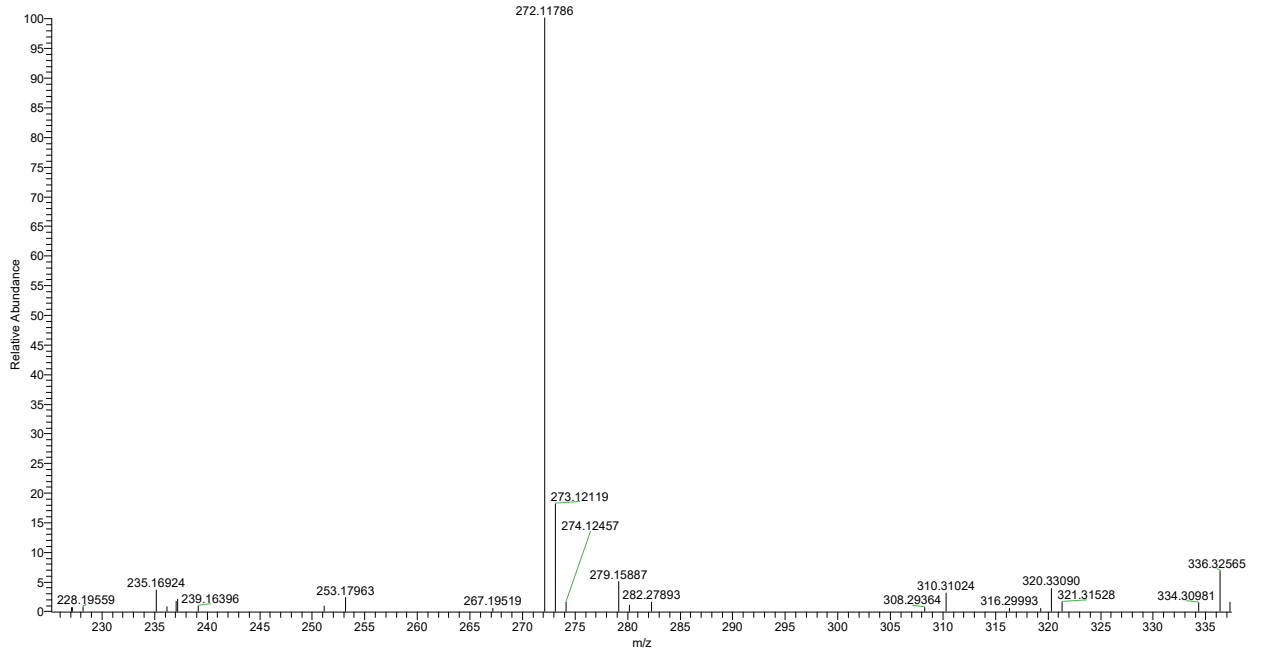

Chemical formula  C18H13N3

Peptide/Protein

Plus H2O  272.1182240 amu

Adduct

Identity H

Concentration One

Charge distribution

Most abundant : 1

# HR-MS spectrum of C5

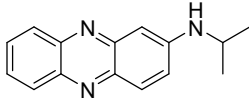

3 #15 RT: 0.17 AV: 1 NL: 5.25E6  
T: FTMS + cAPCI corona Full ms [50.0000-750.0000]

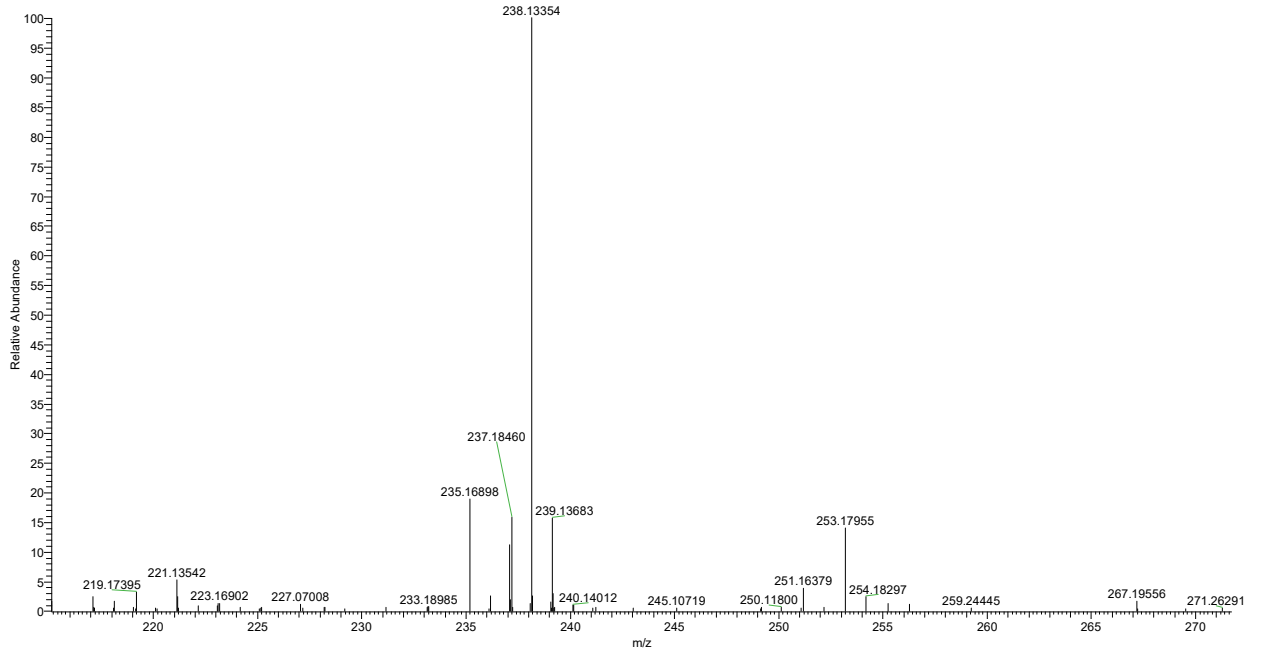

Chemical formula  C15H15N3

Peptide/Protein

Plus H2O  238.1338741 amu

Adduct

Identity H

Concentration One

Charge distribution

Most abundant : 1

# HR-MS spectrum of C6

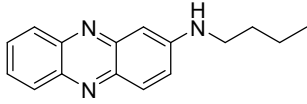

4 #15 RT: 0.17 AV: 1 NL: 1.64E8  
T: FTMS + cAPCI corona Full ms [50.0000-750.0000]

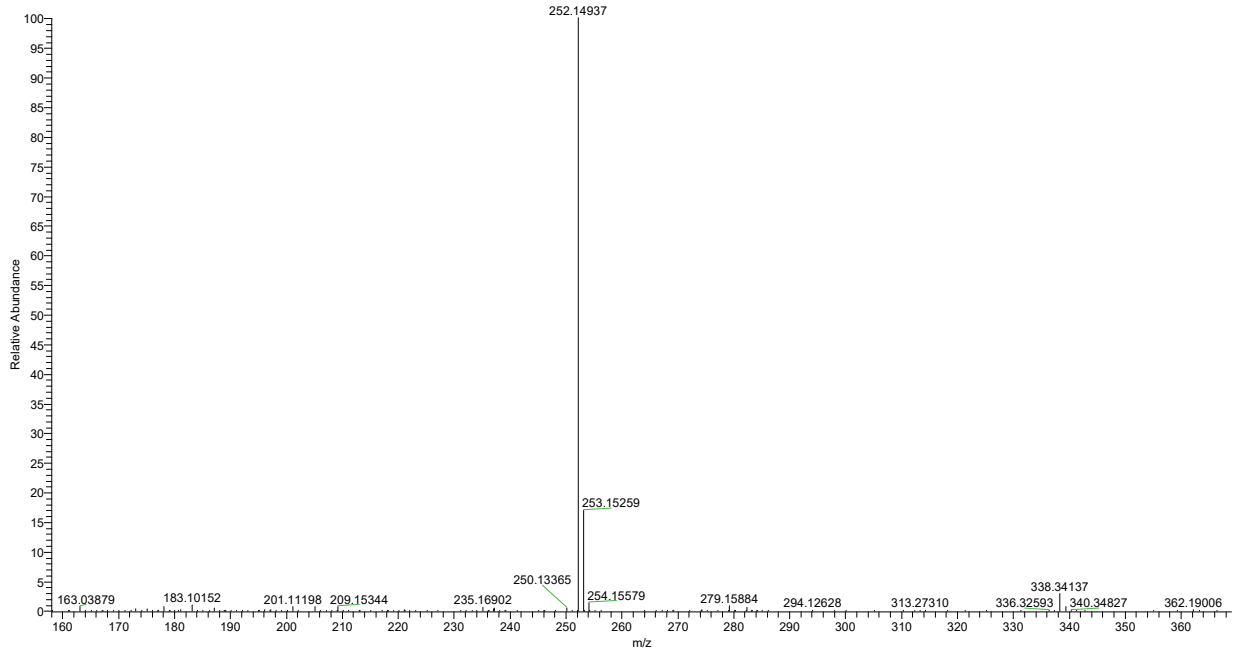

Chemical fomula  C16H17N3

Peptide/Protein

Plus H2O  252.1495241 amu

Adduct

Identity H

Concentration One

Charge distribution

Most abundant : 1

# HR-MS spectrum of C7

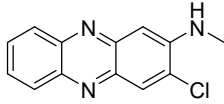

32 #15 RT: 0.17 AV: 1 NL: 6.63E7  
T: FTMS + cAPCI corona Full ms [50.0000-750.0000]

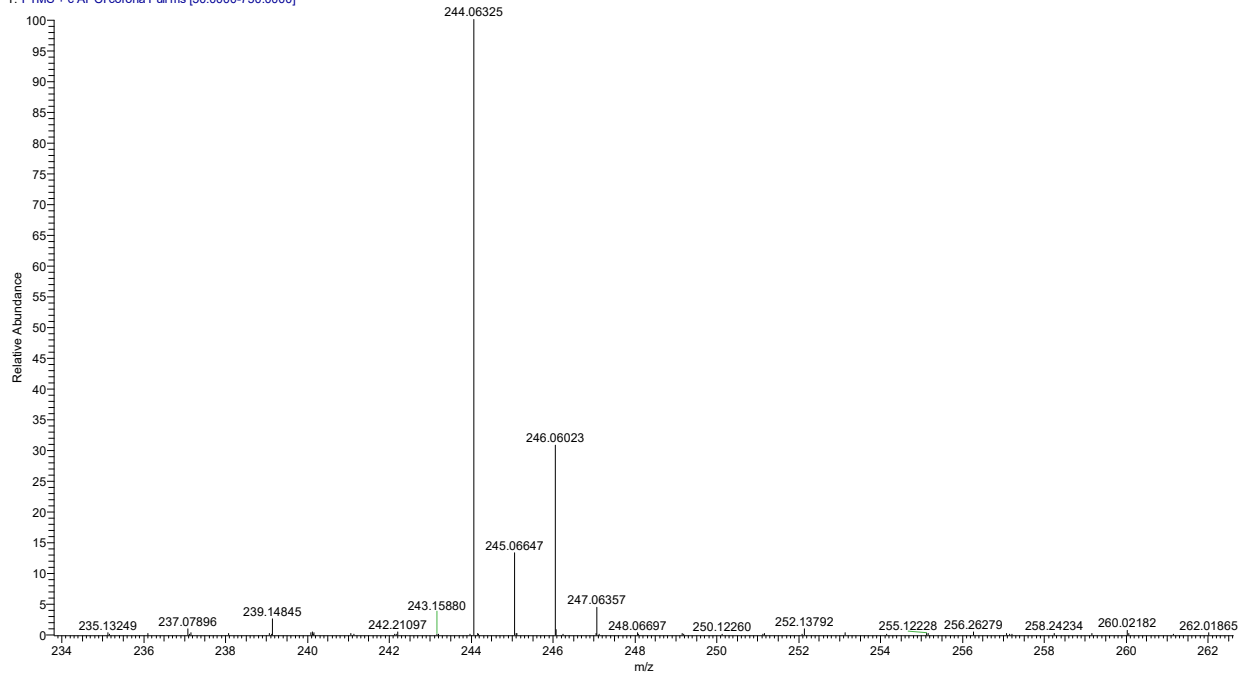

Chemical formula  C13H10ClN3

Peptide/Protein

Plus H2O  244.0636016 amu

Adduct

Identity H

Concentration One

Charge distribution

Most abundant : 1

# HR-MS spectrum of C8

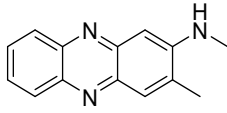

34 #17 RT: 0.19 AV: 1 NL: 9.10E7  
T: FTMS + c APCI corona Full ms [50.0000-750.0000]

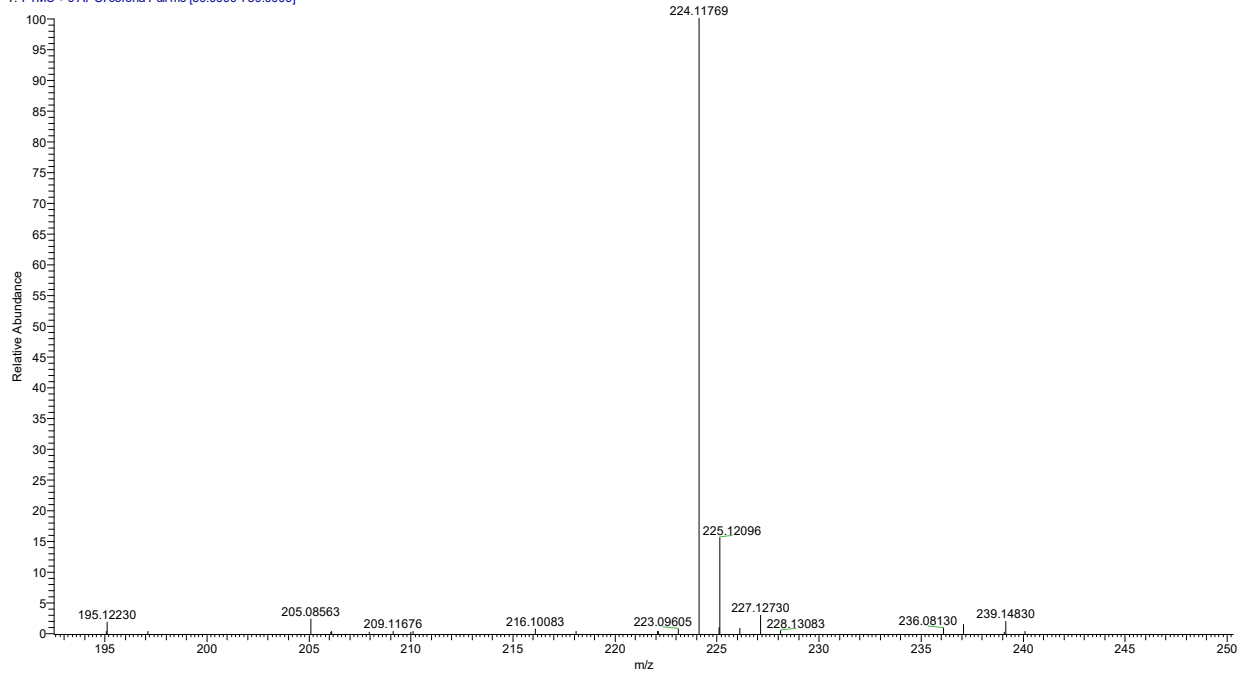

Chemical formula  C14H13N3

Peptide/Protein

Plus H2O  224.1182240 amu

Adduct

Identity H

Concentration One

Charge distribution

Most abundant : 1



# HR-MS spectrum of C9

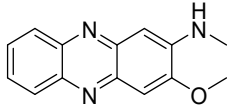

33 #15 RT: 0.17 AV: 1 NL: 9.73E7  
T: FTMS + c APCI corona Full ms [50.0000-750.0000]

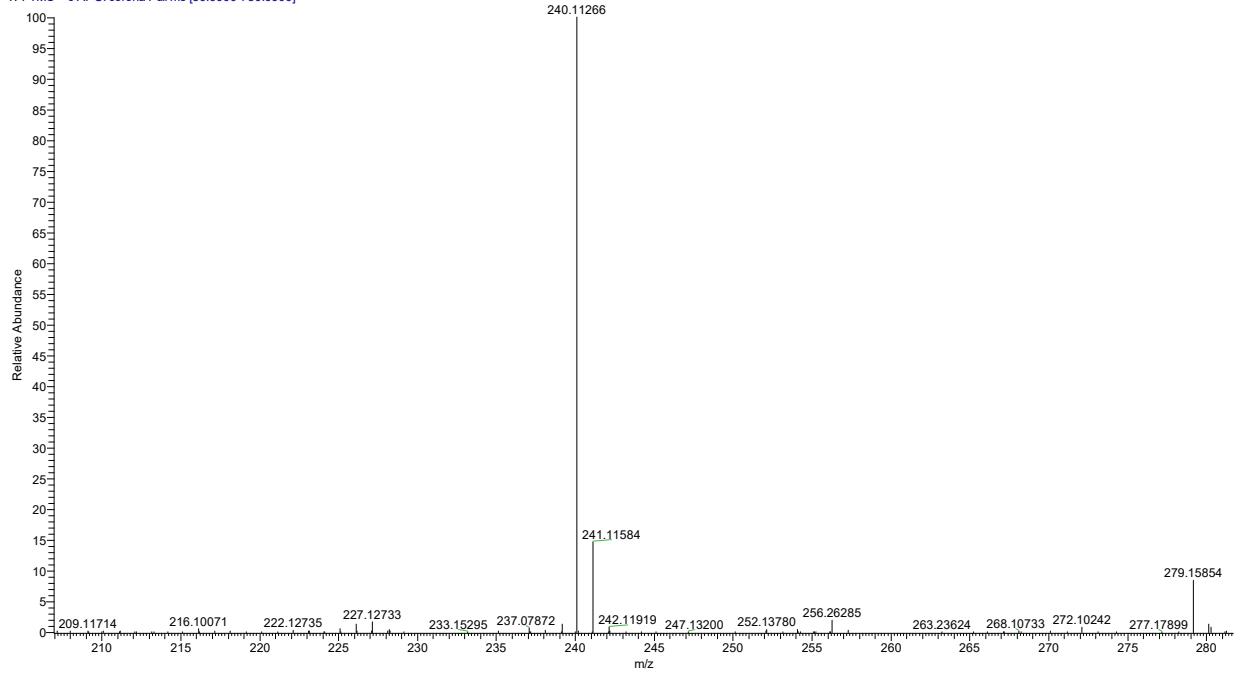

Chemical formula  C14H13N3O

Peptide/Protein

Plus H2O  240.1131386 amu

Adduct

Identity H

Concentration One

Charge distribution

Most abundant : 1

# HR-MS spectrum of C10

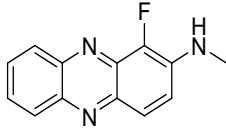

31 #15 RT: 0.17 AV: 1 NL: 1.14E8  
T: FTMS + c APCI corona Full ms [50.0000-750.0000]

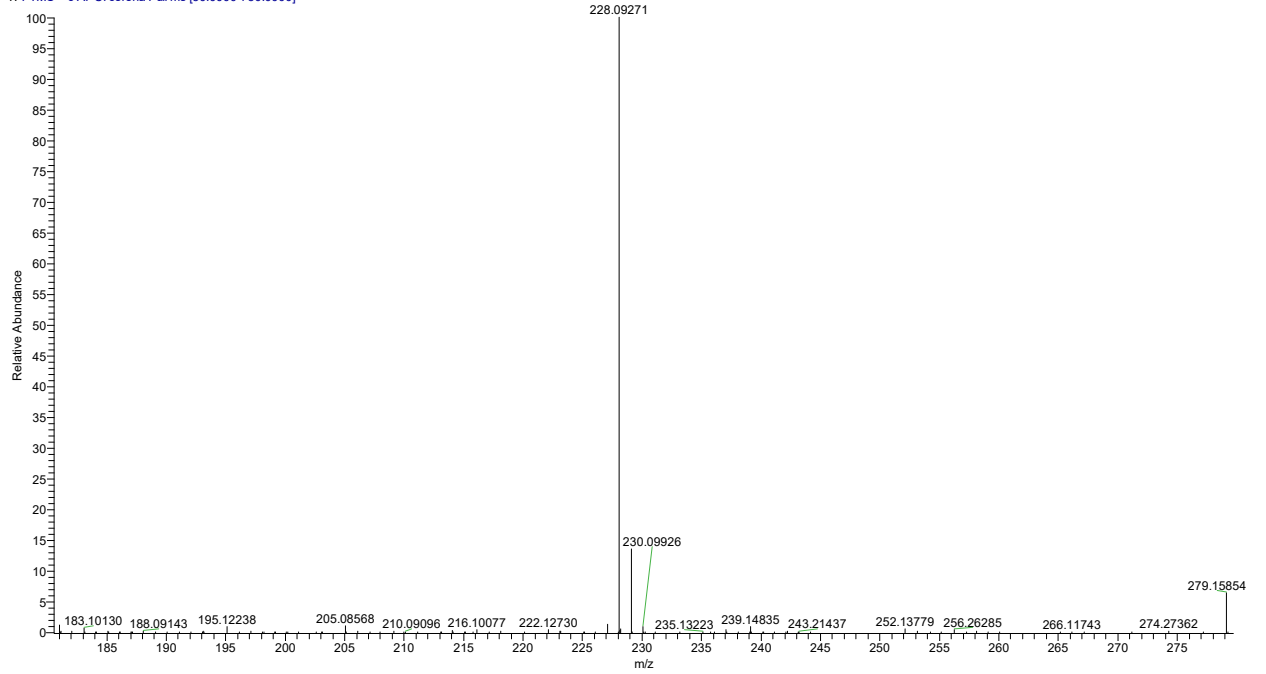

Chemical formula  C13H10FN3

Peptide/Protein

Plus H2O  228.0931521 amu

Adduct

Identity H

Concentration One

Charge distribution

Most abundant : 1

HR-MS spectrum of C11

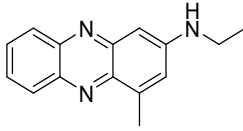

19 #15 RT: 0.17 AV: 1 NL: 9.34E8  
T: FTMS + c APCI corona Full ms [50.0000-750.0000]

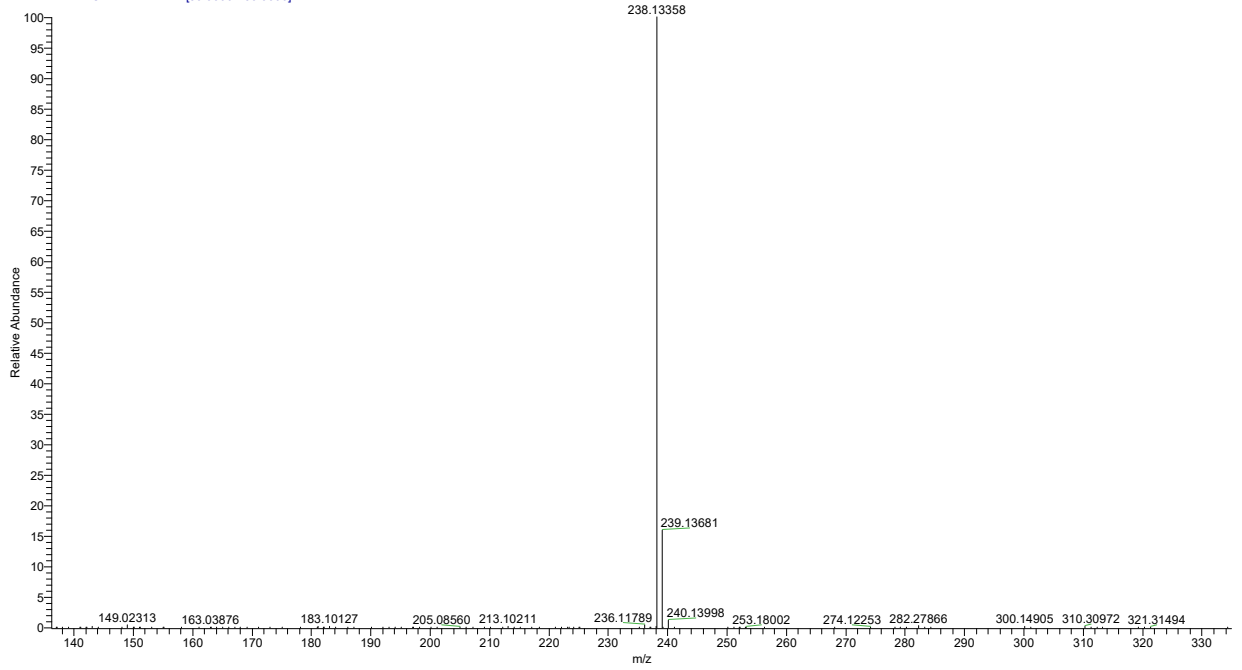

Chemical formula  C15H15N3

Peptide/Protein

Plus H2O  238.1338741 amu

Adduct

Identity H

Concentration One

Charge distribution

Most abundant : 1

# HR-MS spectrum of C12

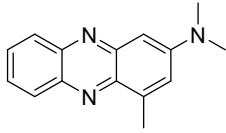

20 #15 RT: 0.17 AV: 1 NL: 3.42E8  
T: FTMS + c APCI corona Full ms [50.0000-750.0000]

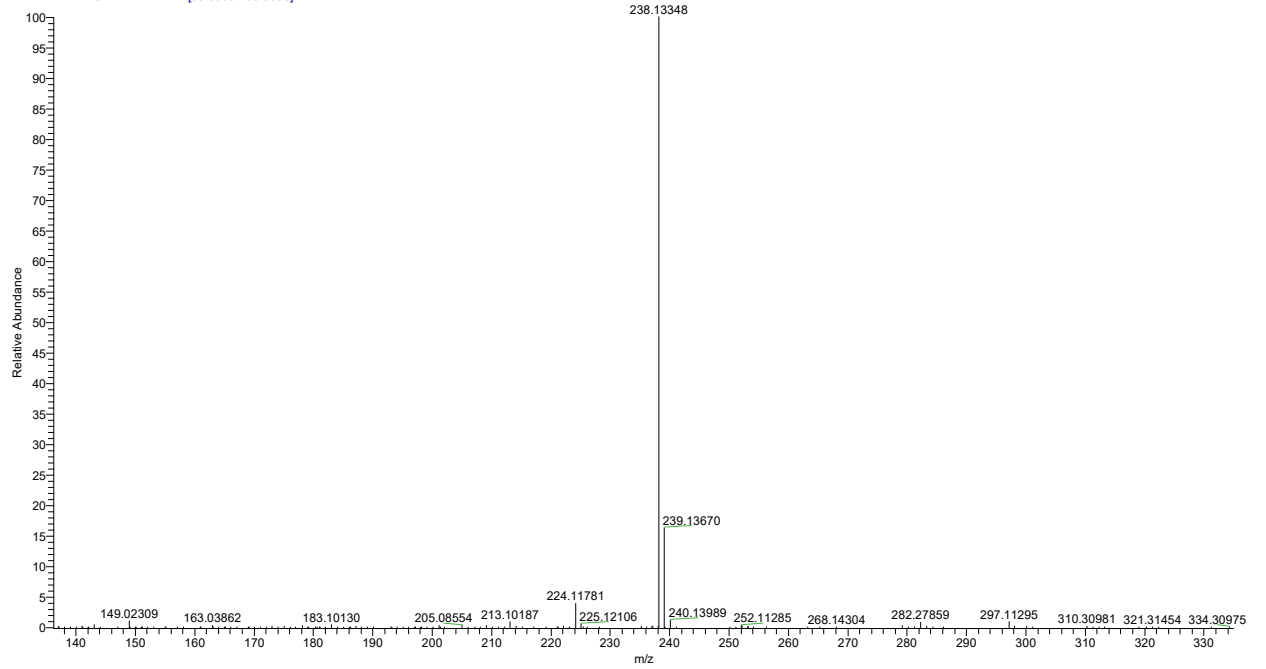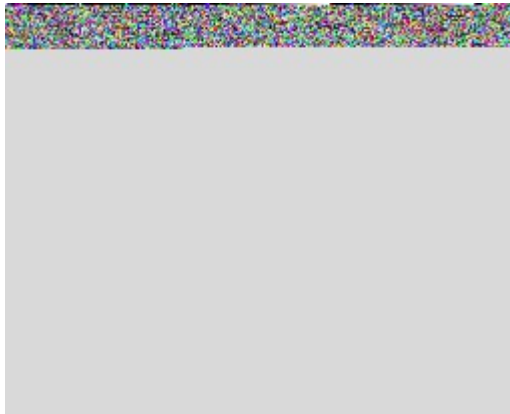

# HR-MS spectrum of C13

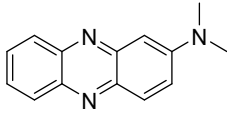

23 #15 RT: 0.17 AV: 1 NL: 2.83E8  
T: FTMS + c APCI corona Full ms [50.0000-750.0000]

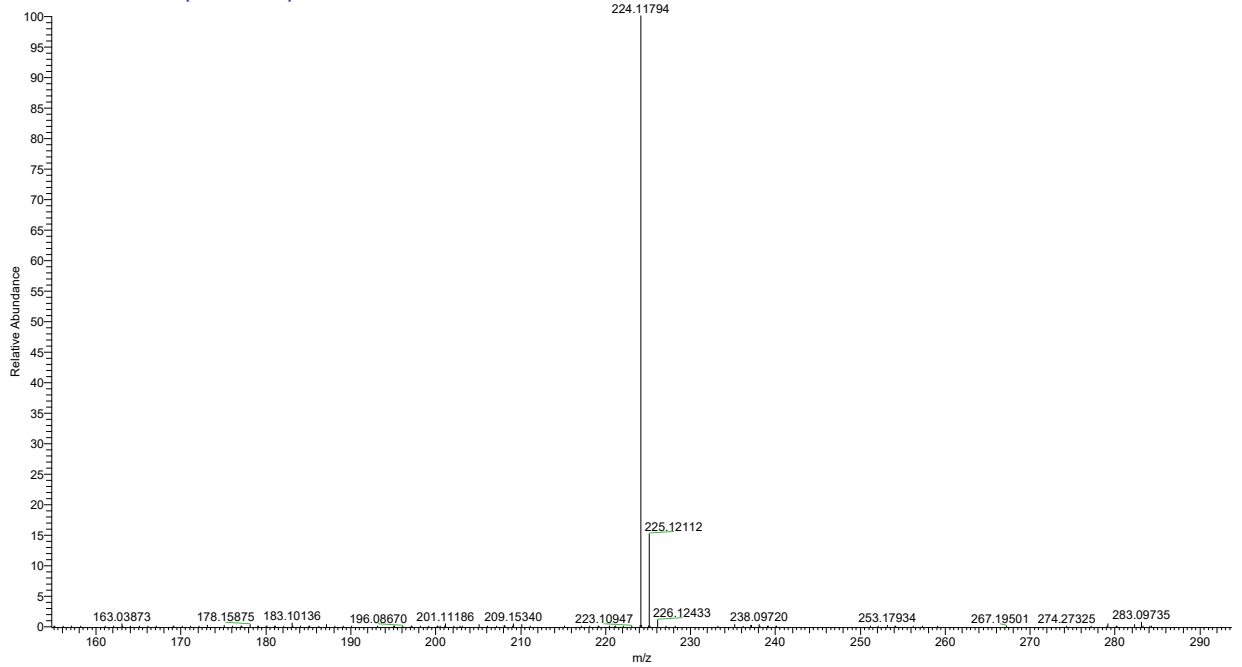

Chemical formula  C14H13N3

Peptide/Protein

Plus H2O  224.1182240 amu

Adduct

Identity H

Concentration One

Charge distribution

Most abundant : 1

HR-MS spectrum of C14

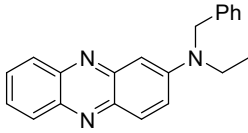

29 #13 RT: 0.14 AV: 1 NL: 9.70E7  
T: FTMS + c APCI corona Full ms [50.0000-750.0000]

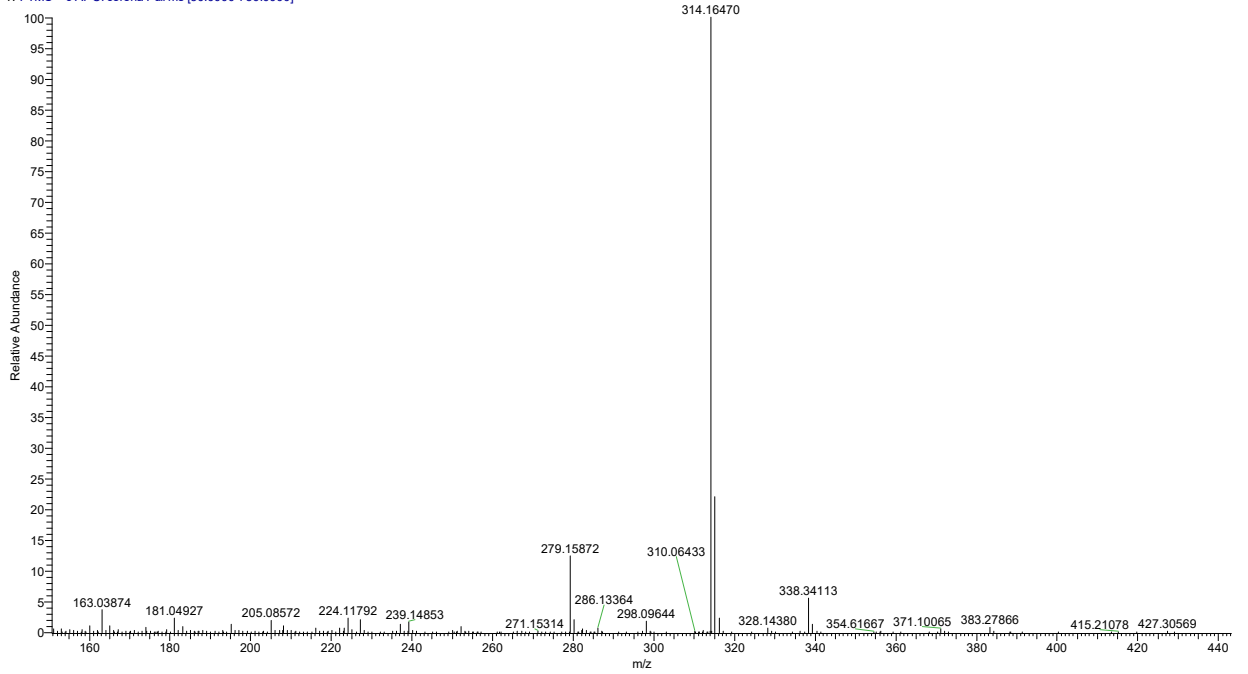

Chemical fomula  C21H19N3

Peptide/Protein

Plus H2O  314.1651742 amu

Adduct

Identity H

Concentration One

Charge distribution

Most abundant : 1

# HR-MS spectrum of C15

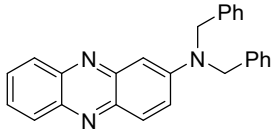

30 #13 RT: 0.14 AV: 1 NL: 3.21E6  
T: FTMS + c APCI corona Full ms [50.0000-750.0000]

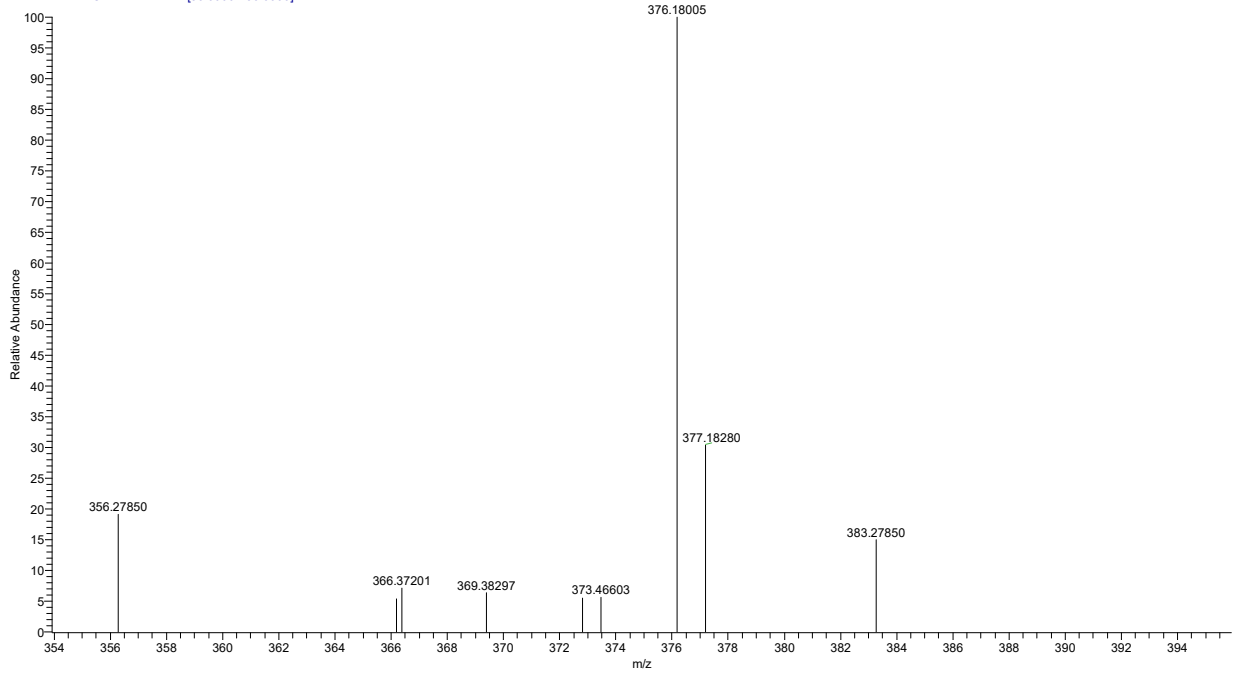

Chemical formula  C26H21N3

Peptide/Protein

Plus H2O  376.1808243 amu

Adduct

Identity H

Concentration One

Charge distribution

Most abundant : 1

# HR-MS spectrum of C16

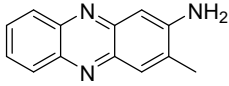

5 #15 RT: 0.17 AV: 1 NL: 2.11E8  
T: FTMS + c APCI corona Full ms [50.0000-750.0000]

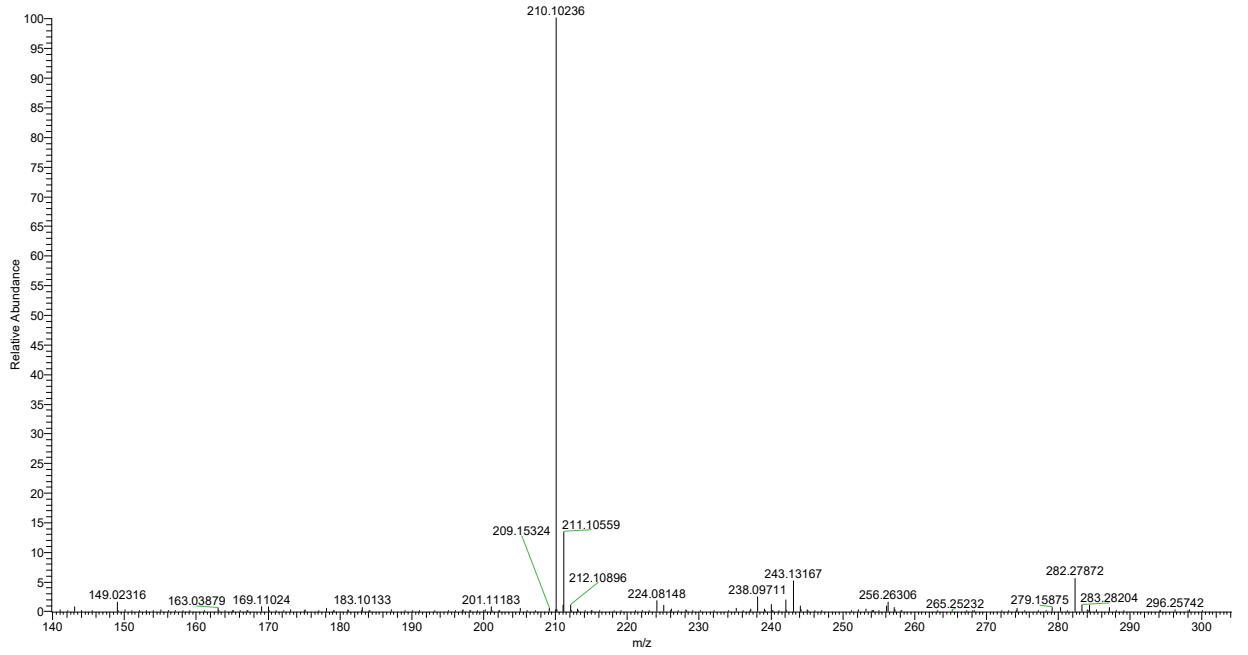

Chemical formula  C13H11N3

Peptide/Protein

Plus H2O  210.1025740 amu

Adduct

Identity H

Concentration One

Charge distribution

Most abundant : 1



# HR-MS spectrum of C17

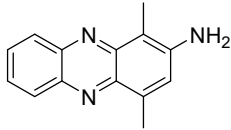

12 #15 RT: 0.16 AV: 1 NL: 1.27E9  
T: FTMS + c APCI corona Full ms [50.0000-750.0000]

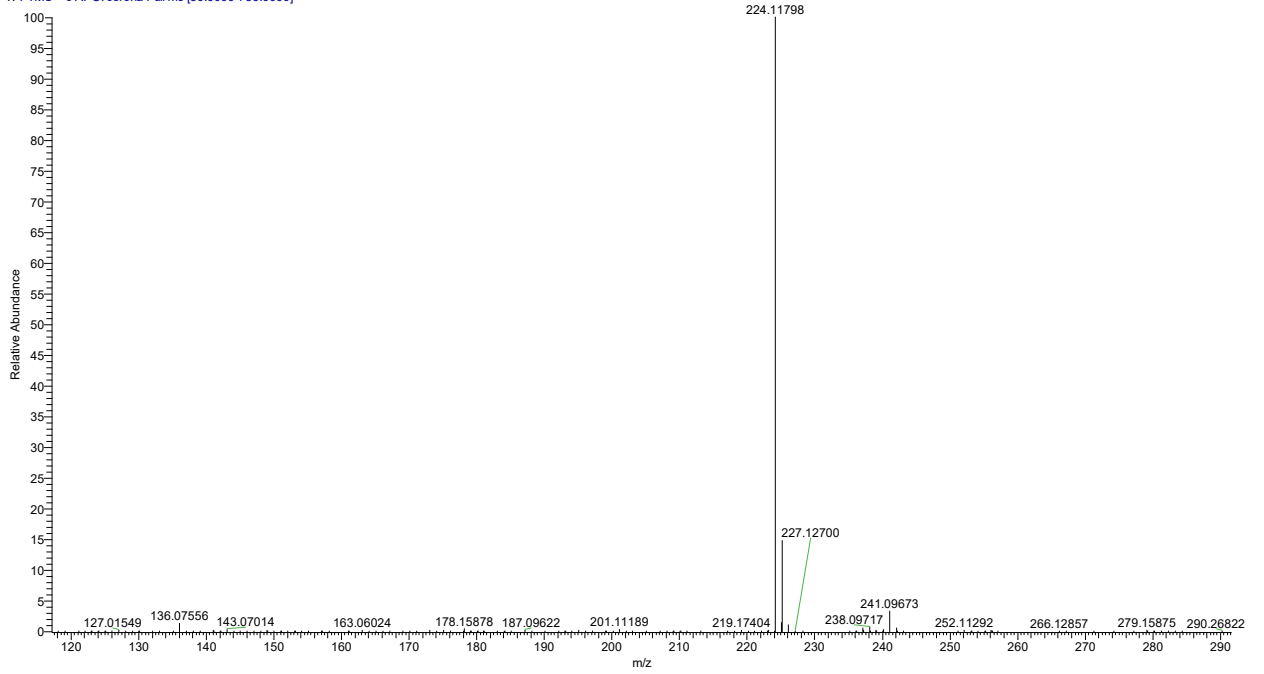

Chemical formula  C14H13N3

Peptide/Protein

Plus H2O  224.1182240 amu

Adduct

Identity H

Concentration One

Charge distribution

Most abundant : 1

# HR-MS spectrum of C18

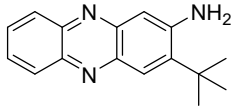

22 #15 RT: 0.17 AV: 1 NL: 4.33E7  
T: FTMS + c APCI corona Full ms [50.0000-750.0000]

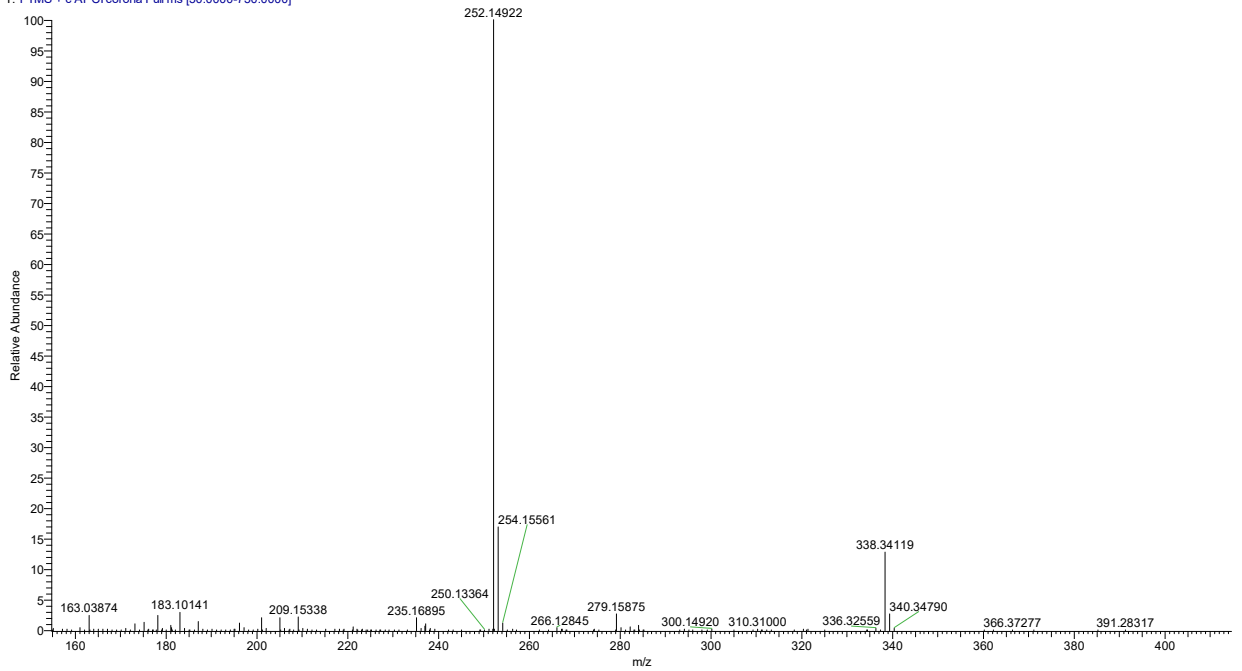

Chemical formula  C16H17N3

Peptide/Protein

Plus H2O  252.1495241 amu

Adduct

Identity H

Concentration One

Charge distribution

Most abundant : 1

# HR-MS spectrum of C19

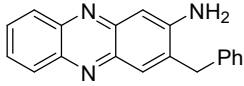

16 #15 RT: 0.17 AV: 1 NL: 1.63E6  
T: FTMS + c APCI corona Full ms [50.0000-750.0000]

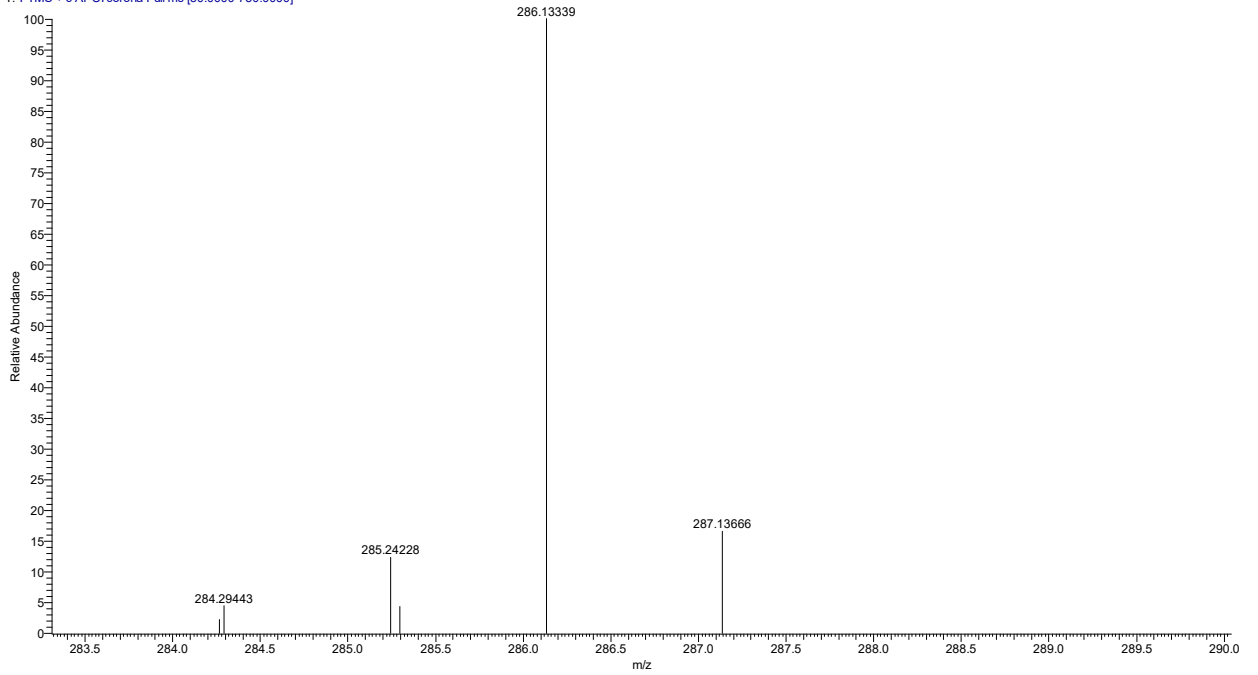

Chemical formula  C19H15N3

Peptide/Protein

Plus H2O  286.1338741 amu

Adduct

Identity H

Concentration One

Charge distribution

Most abundant : 1

# HR-MS spectrum of C19'

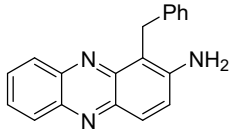

6 #15 RT: 0.17 AV: 1 NL: 4.65E8  
T: FTMS + c APCI corona Full ms [50.0000-750.0000]

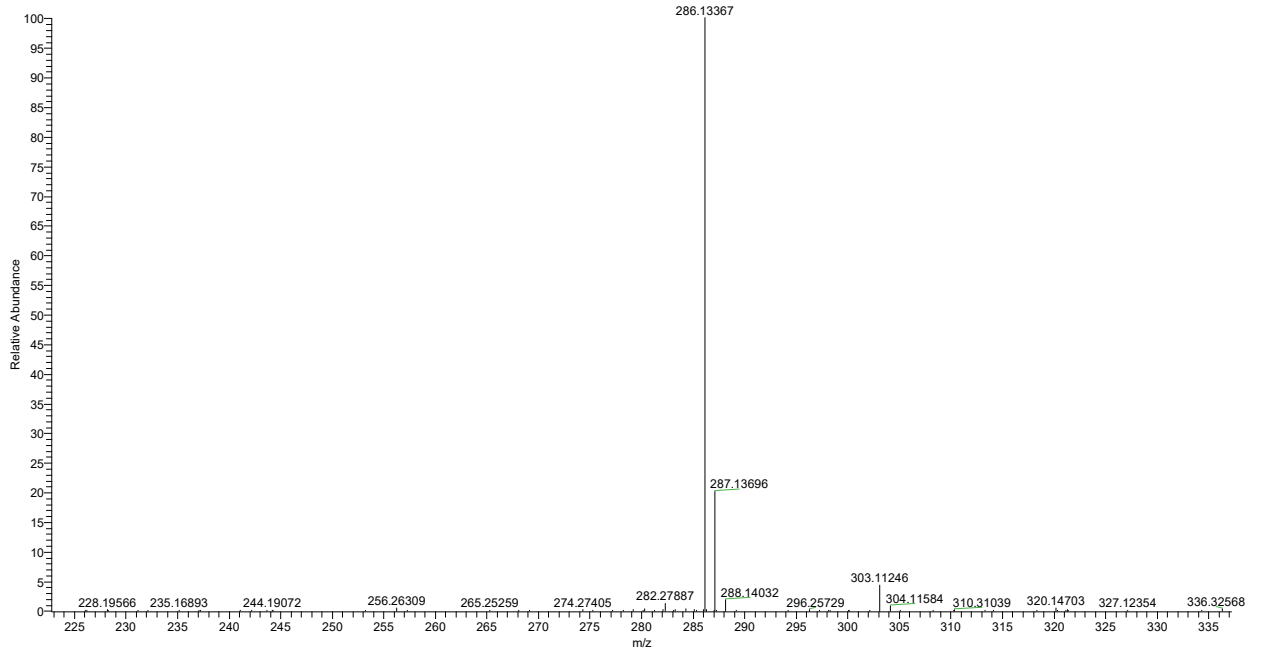

Chemical formula  C19H15N3

Peptide/Protein

Plus H<sub>2</sub>O  286.1338741 amu

Adduct

Identity H

Concentration One

Charge distribution

Most abundant : 1

HR-MS spectrum of C20

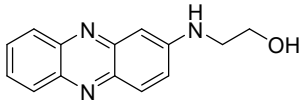

7 #15 RT: 0.17 AV: 1 NL: 5.38E8  
T: FTMS + cAPCI corona Full ms [50.0000-750.0000]

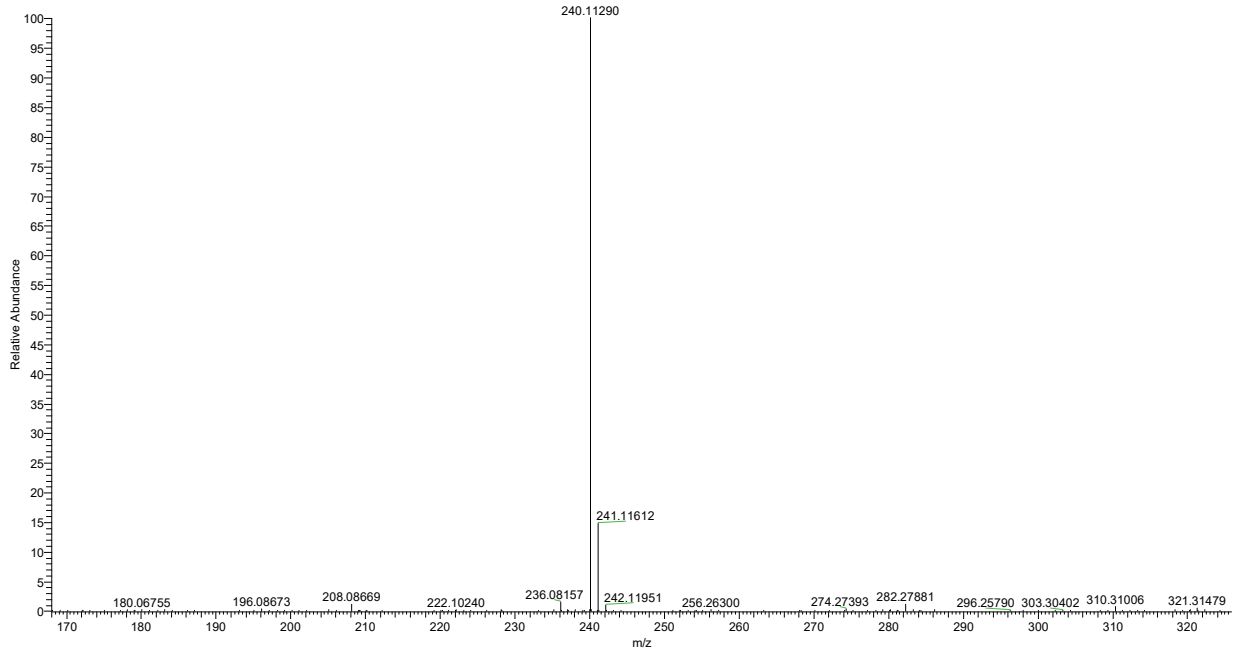

Chemical formula  C14H13N3O

Peptide/Protein

Plus H2O  240.1131386 amu

Adduct

Identity H

Concentration One

Charge distribution

Most abundant : 1

# HR-MS spectrum of C21

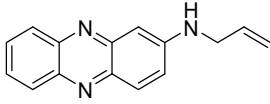

36 #15 RT: 0.17 AV: 1 NL: 1.10E8  
T: FTMS + c APCI corona Full ms [50.0000-750.0000]

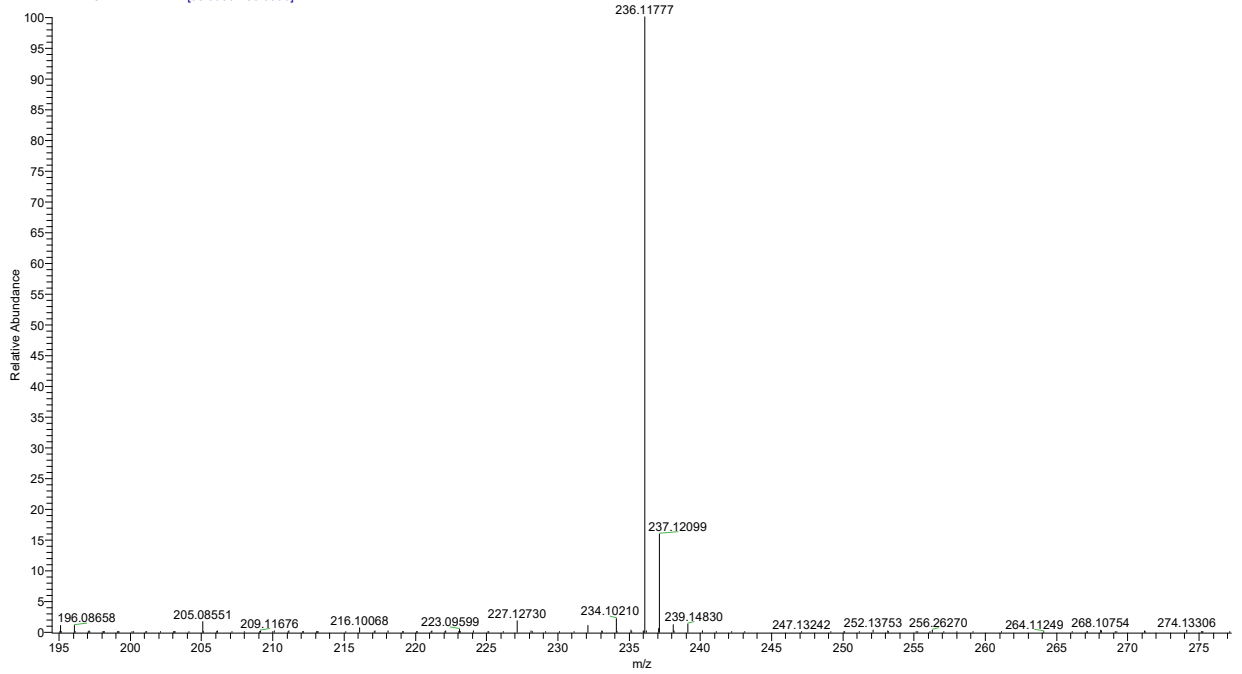

Chemical formula  C15H13N3

Peptide/Protein

Plus H2O  236.1182240 amu

Adduct

Identity H

Concentration One

Charge distribution

Most abundant : 1

HR-MS spectrum of C22

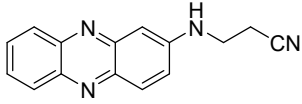

37 #17 RT: 0.19 AV: 1 NL: 2.52E7  
T: FTMS + cAPCI corona Full ms [50.0000-750.0000]

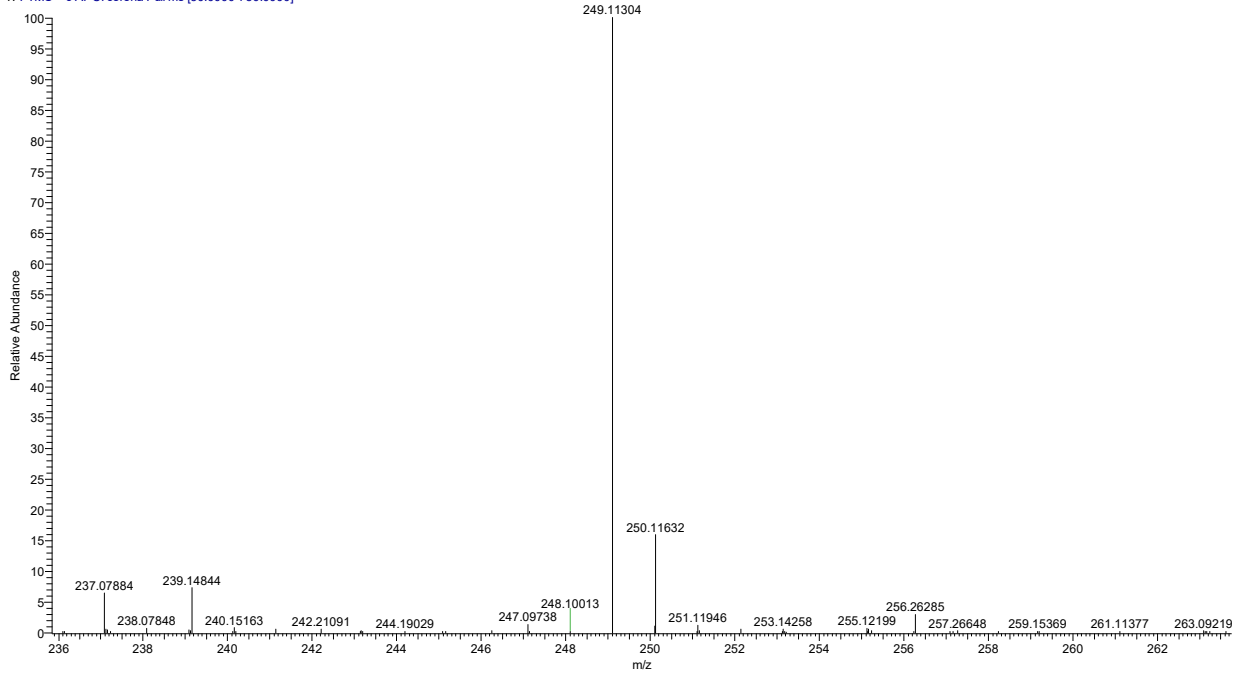

Chemical formula  C15H12N4

Peptide/Protein

Plus H2O  249.1134730 amu

Adduct

Identity H

Concentration One

Charge distribution

Most abundant : 1

# HR-MS spectrum of C23

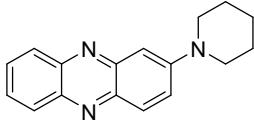

8 #15 RT: 0.17 AV: 1 NL: 9.20E8  
T: FTMS + c APCI corona Full ms [50.0000-750.0000]

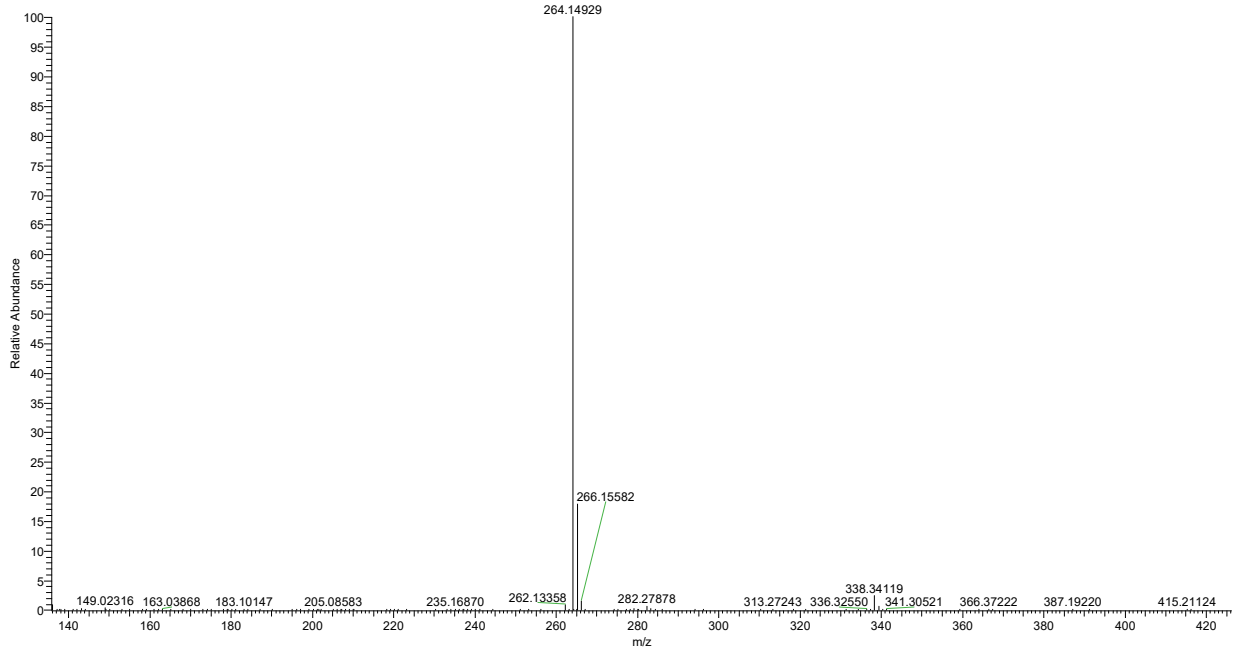

Chemical formula  C17H17N3

Peptide/Protein

Plus H2O  264.1495241 amu

Adduct

Identity H

Concentration One

Charge distribution

Most abundant : 1



# HR-MS spectrum of C24

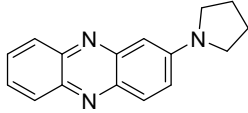

9 #15 RT: 0.17 AV: 1 NL: 2.94E9  
T: FTMS + c APCI corona Full ms [50.0000-750.0000]

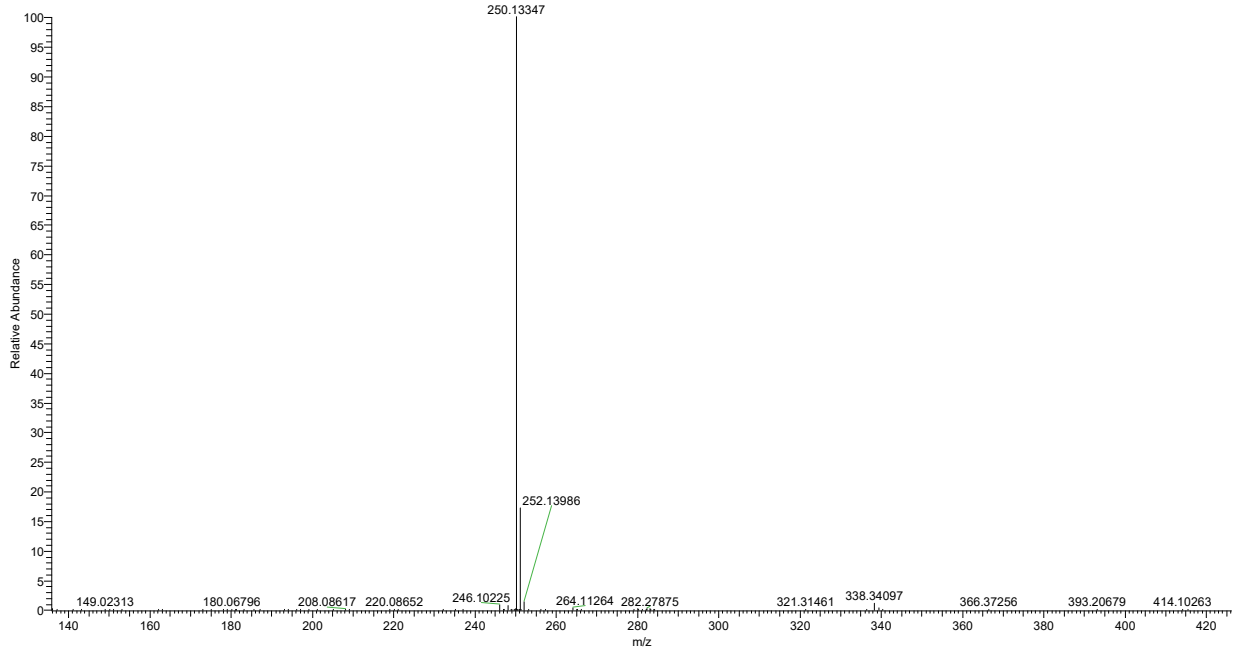

Chemical formula  C16H15N3

Peptide/Protein

Plus H2O  250.1338741 amu

Adduct

Identity H

Concentration One

Charge distribution

Most abundant : 1

# HR-MS spectrum of C25

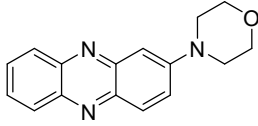

10 #15 RT: 0.17 AV: 1 NL: 1.25E9  
T: FTMS + c APCI corona Full ms [50.0000-750.0000]

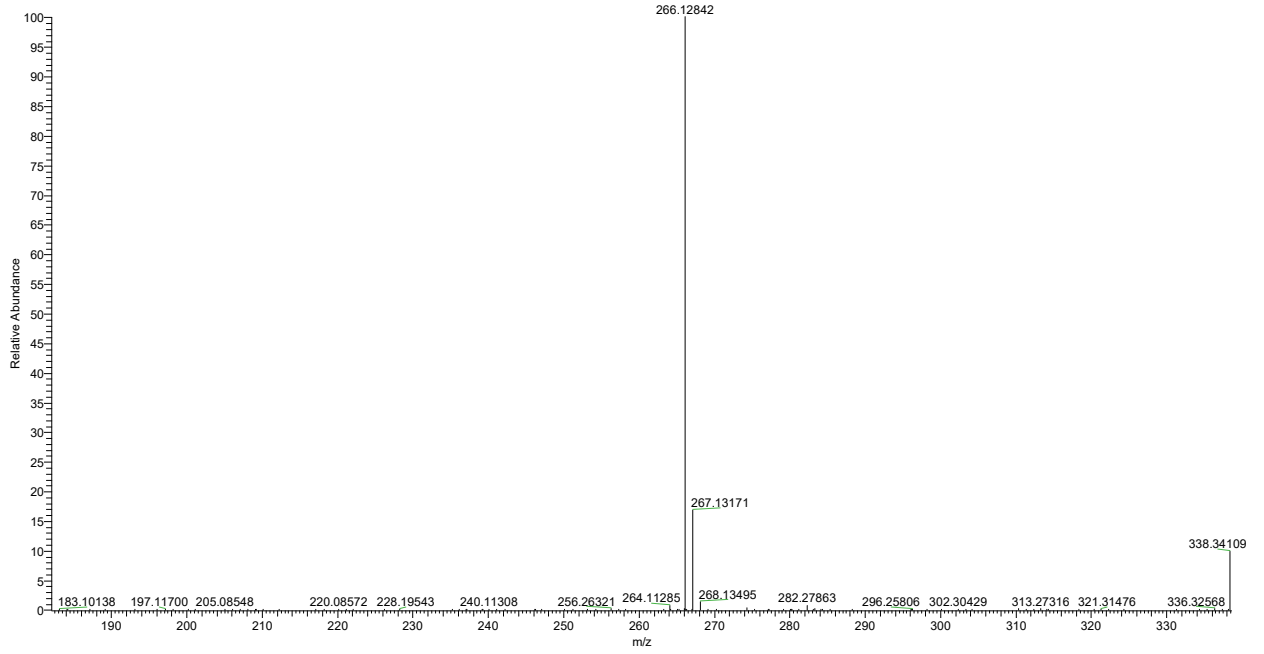

Chemical formula  C16H15N3O

Peptide/Protein

Plus H2O  266.1287887 amu

Adduct

Identity H

Concentration One

Charge distribution

Most abundant : 1

HR-MS spectrum of C26

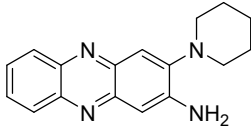

10 #15 RT: 0.17 AV: 1 NL: 1.59E8  
T: FTMS + c APCI corona Full ms [50.0000-750.0000]

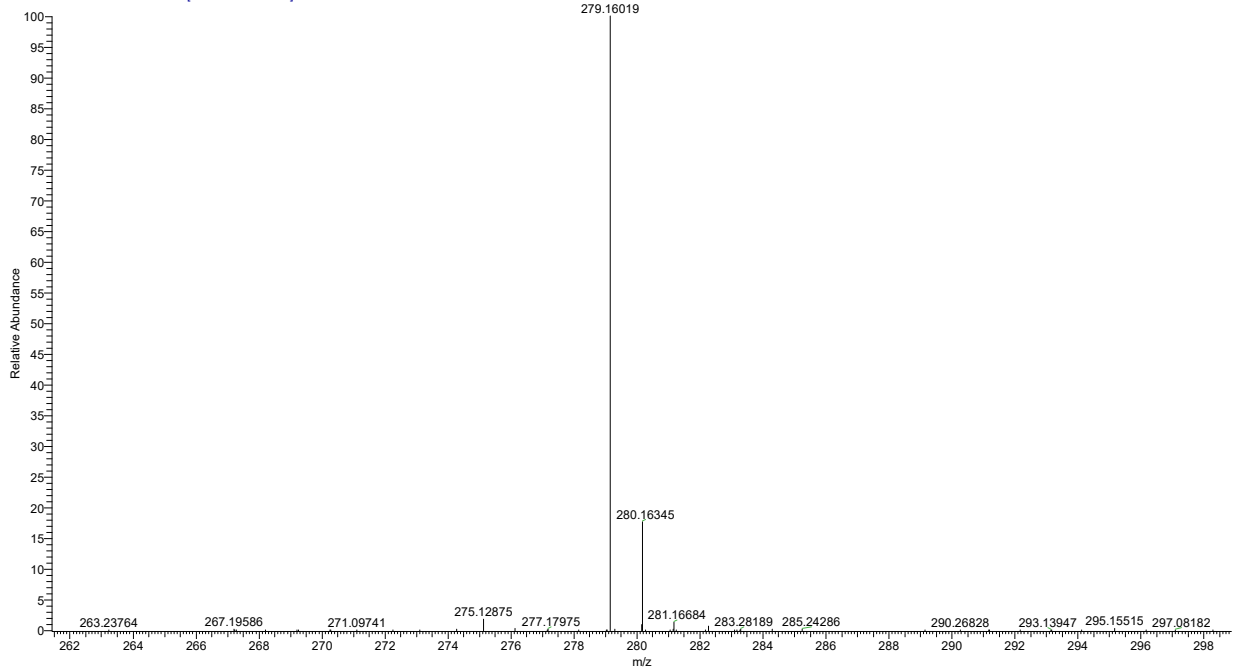

Chemical formula  C17H18N4

Peptide/Protein

Plus H2O  279.1604232 amu

Adduct

Identity H

Concentration One

Charge distribution

Most abundant : 1

# HR-MS spectrum of C27

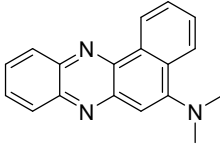

11 #15 RT: 0.17 AV: 1 NL: 1.78E8  
T: FTMS + c APCI corona Full ms [50.0000-750.0000]

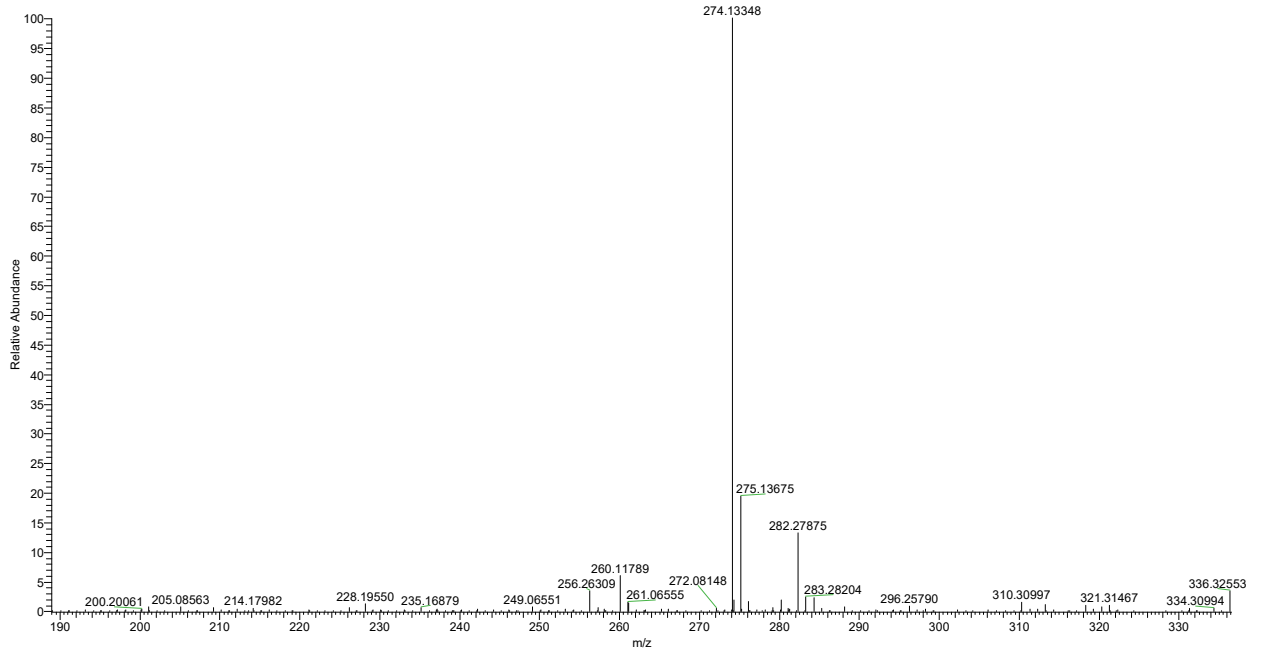

Chemical formula  C18H15N3

Peptide/Protein

Plus H2O  274.1338741 amu

Adduct

Identity H

Concentration One

Charge distribution

Most abundant : 1

# HR-MS spectrum of C28

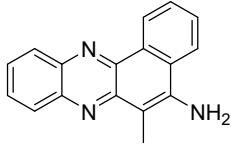

84 #13 RT: 0.14 AV: 1 NL: 2.84E8  
T: FTMS + cAPCI corona Full ms [60.0000-900.0000]

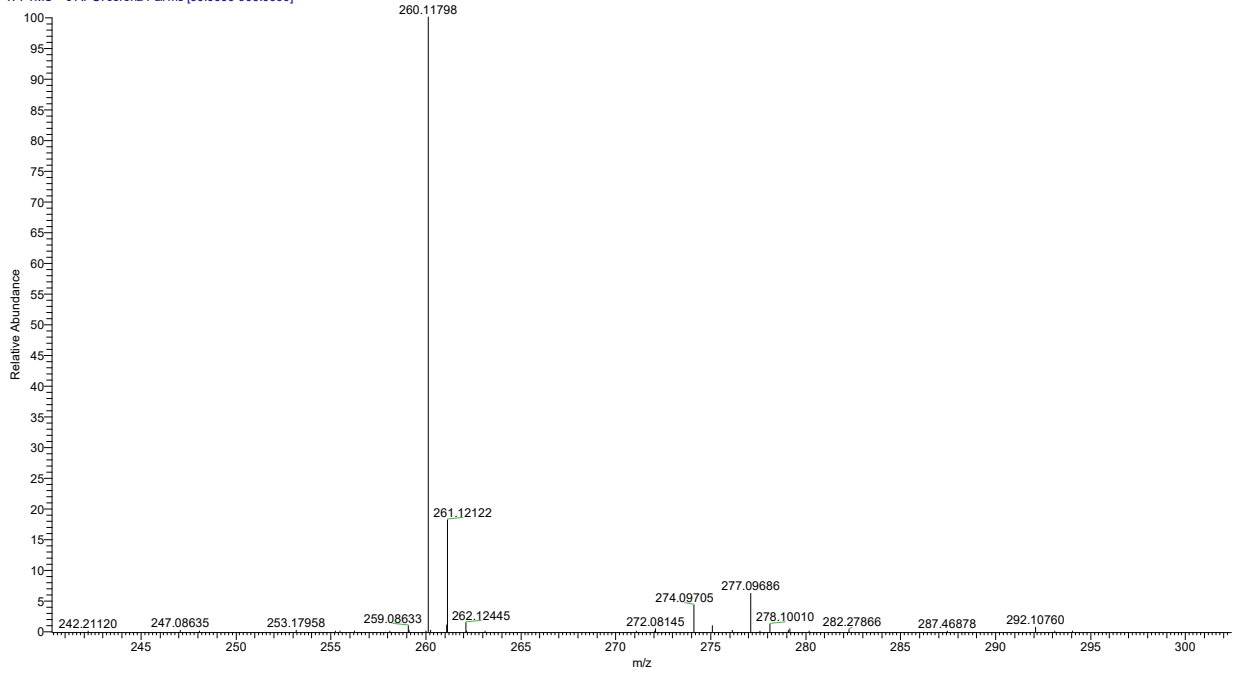

Chemical formula  C17H13N3

Peptide/Protein

Plus H2O  260.1182240 amu

Adduct

Identity H

Concentration One

Charge distribution

Most abundant : 1

# HR-MS spectrum of C29

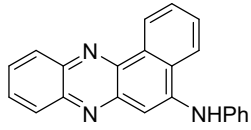

12 #15 RT: 0.17 AV: 1 NL: 1.11E8  
T: FTMS + c APCI corona Full ms [50.0000-750.0000]

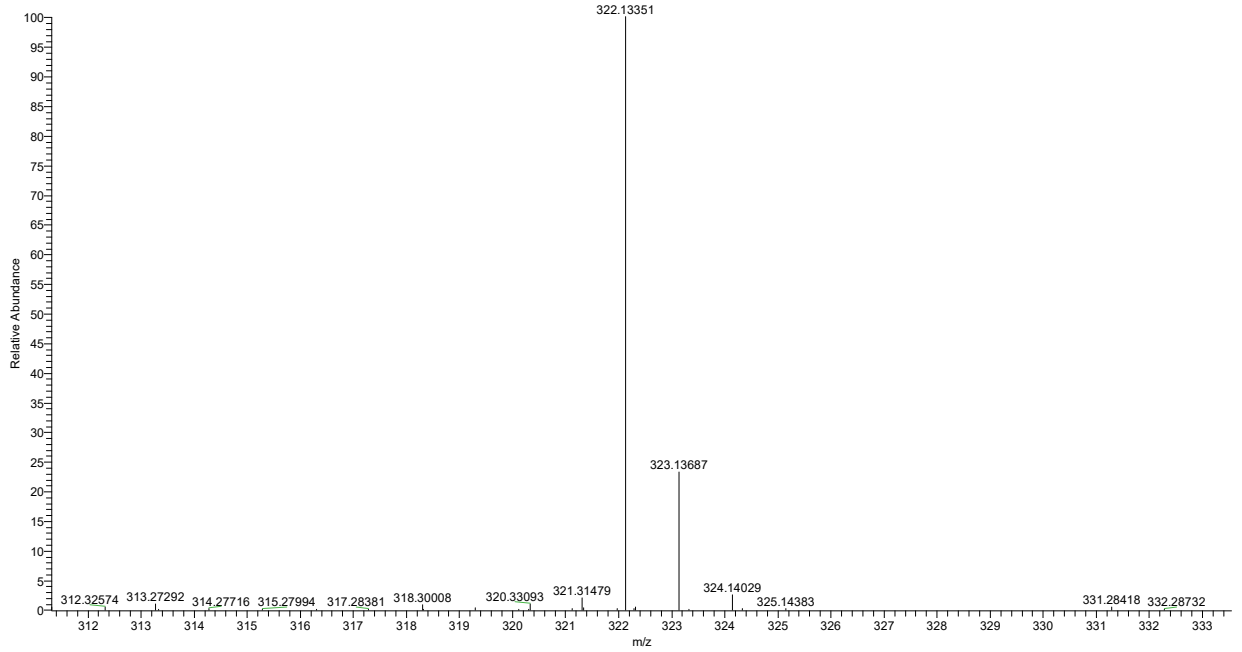

Chemical formula  C22H15N3

Peptide/Protein

Plus H2O  322.1338741 amu

Adduct

Identity H

Concentration One

Charge distribution

Most abundant : 1

HR-MS spectrum of C30

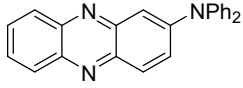

38 #15 RT: 0.17 AV: 1 NL: 6.61E6  
T: FTMS + c APCI corona Full ms [50.0000-750.0000]

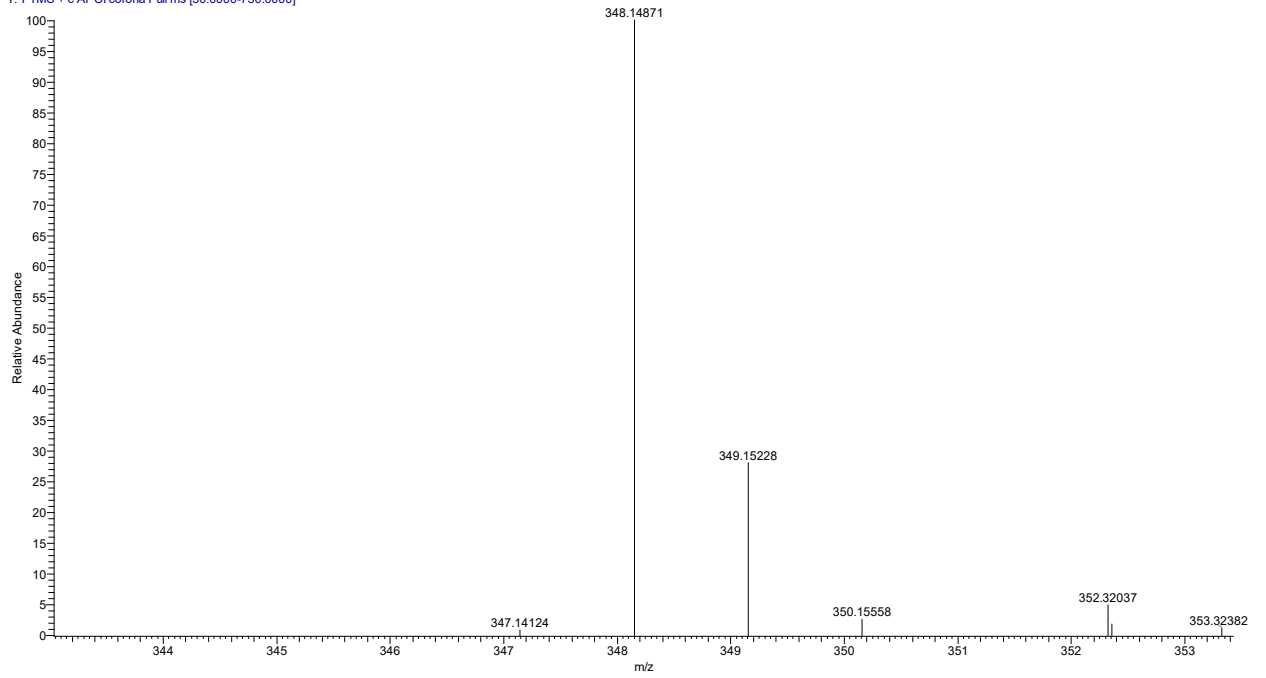

Chemical formula  C24H17N3

Peptide/Protein

Plus H2O  348.1495241 amu

Adduct

Identity H

Concentration One

Charge distribution

Most abundant : 1

# HR-MS spectrum of C31

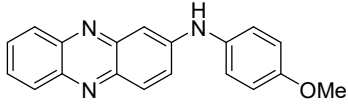

9 #15 RT: 0.17 AV: 1 NL: 3.96E7  
T: FTMS + cAPCI corona Full ms [50.0000-750.0000]

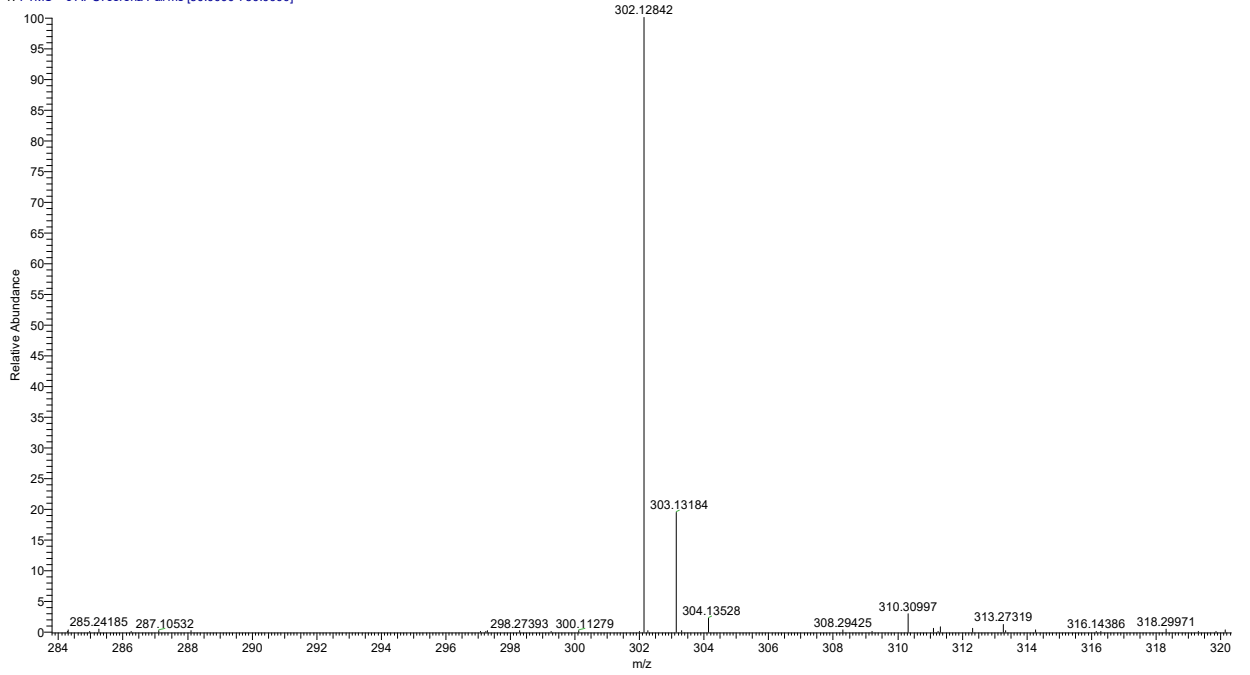

Chemical formula  C19H15N3O

Peptide/Protein

Plus H2O  302.1287887 amu

Adduct

Identity H

Concentration One

Charge distribution

Most abundant : 1



# HR-MS spectrum of C32

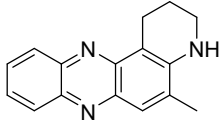

82 #15 RT: 0.17 AV: 1 NL: 1.24E8  
T: FTMS + c APCI corona Full ms [60.0000-900.0000]

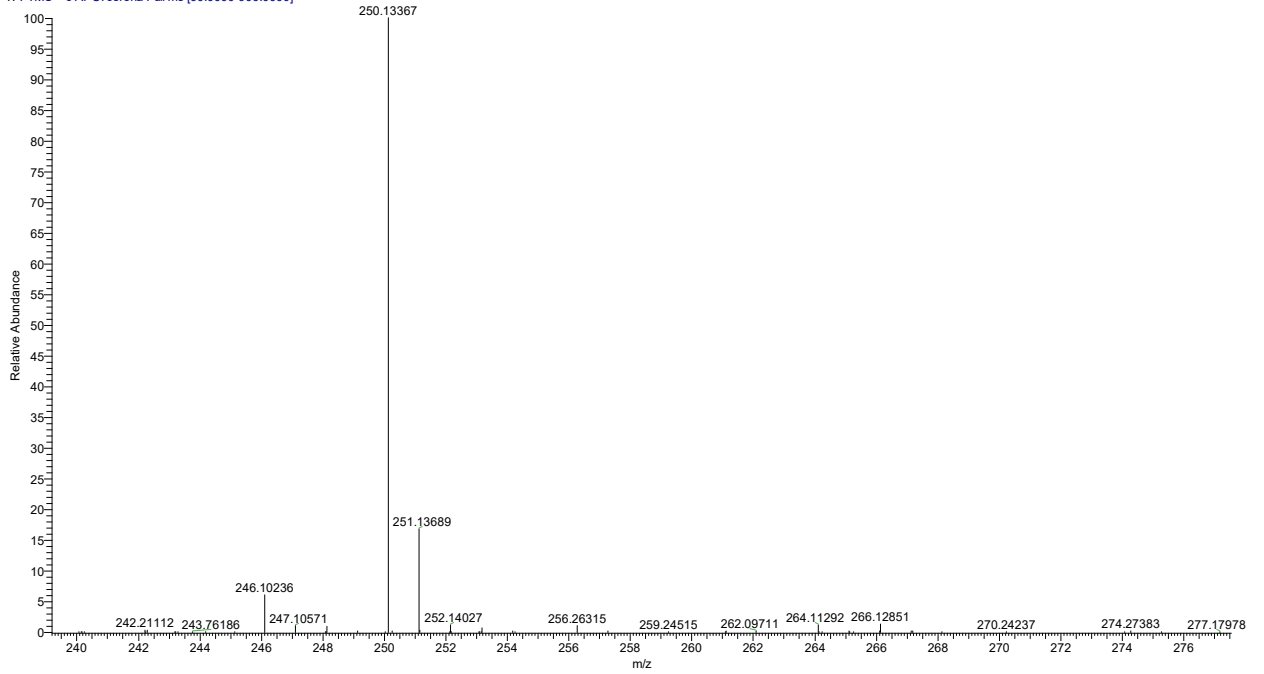

Chemical formula  C16H15N3

Peptide/Protein

Plus H2O  250.1338741 amu

Adduct

Identity H

Concentration One

Charge distribution

Most abundant : 1

# HR-MS spectrum of C32'

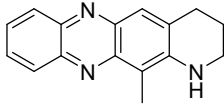

81 #15 RT: 0.17 AV: 1 NL: 8.36E7  
T: FTMS + c APCI corona Full ms [60.0000-900.0000]

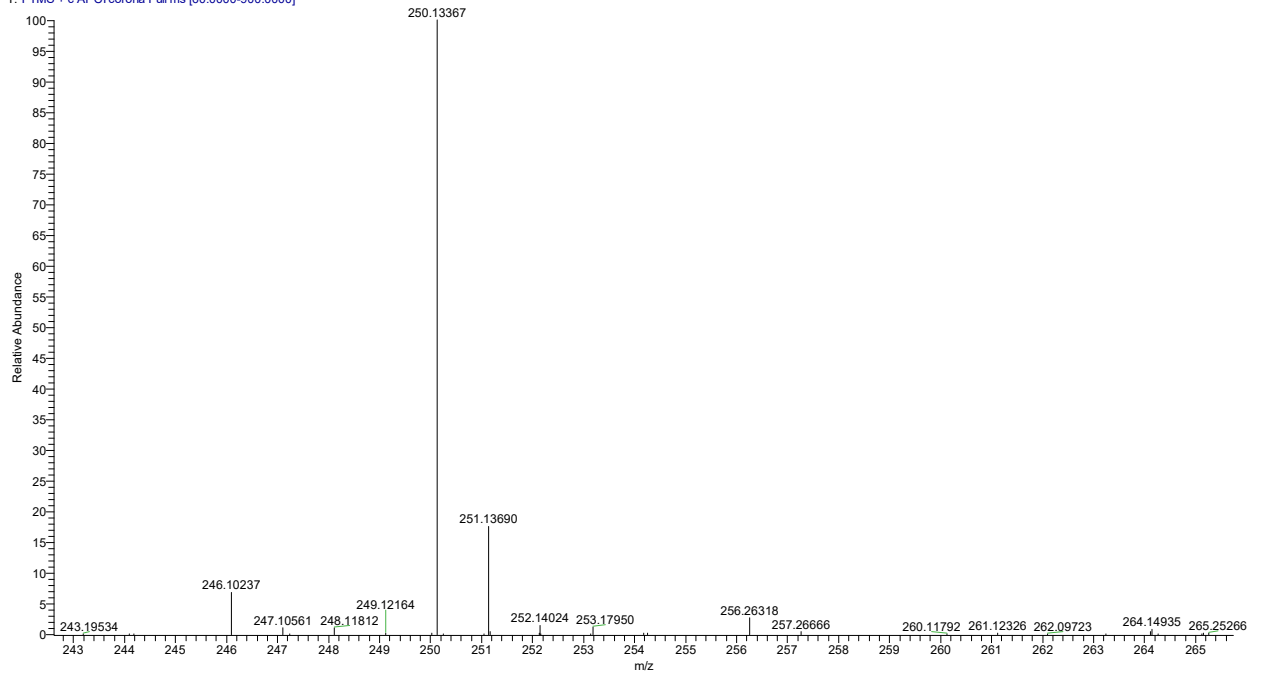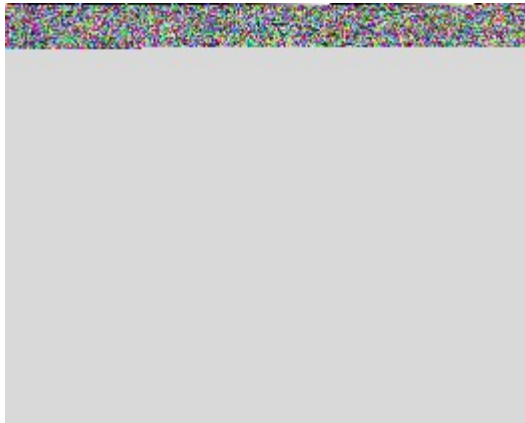

HR-MS spectrum of C33

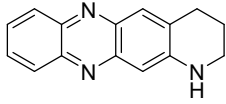

35 #13 RT: 0.14 AV: 1 NL: 2.85E7  
T: FTMS + cAPCI corona Full ms [50.0000-750.0000]

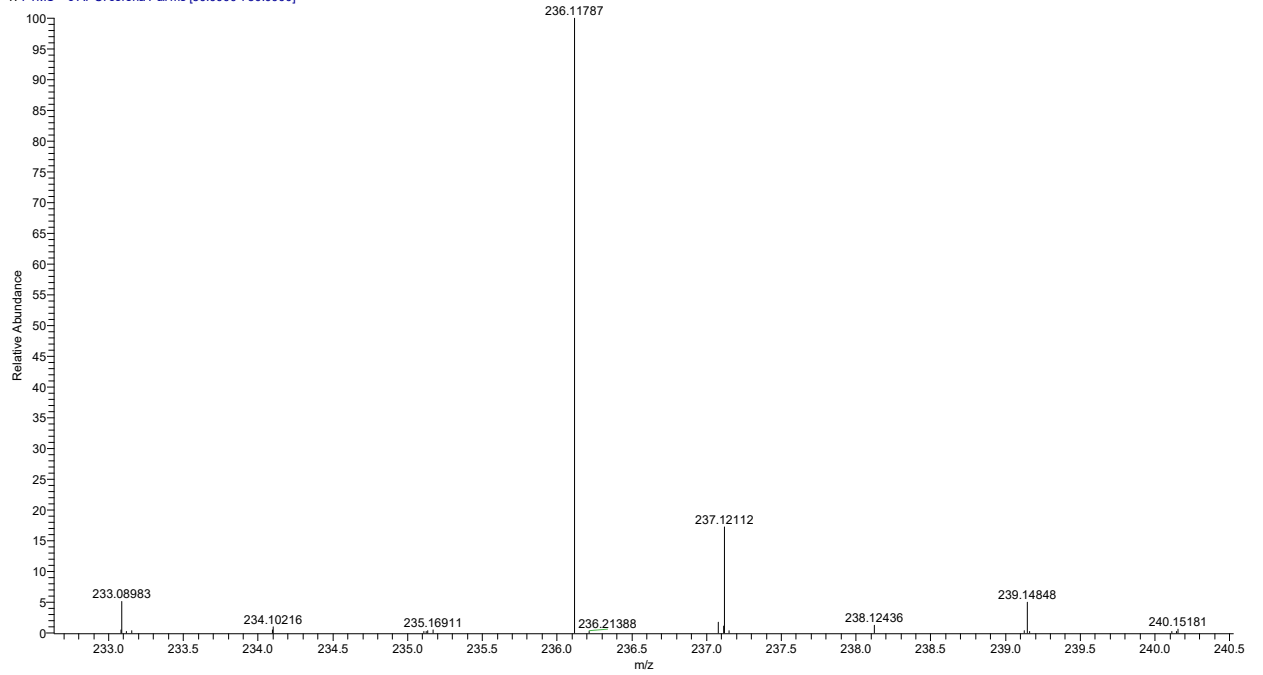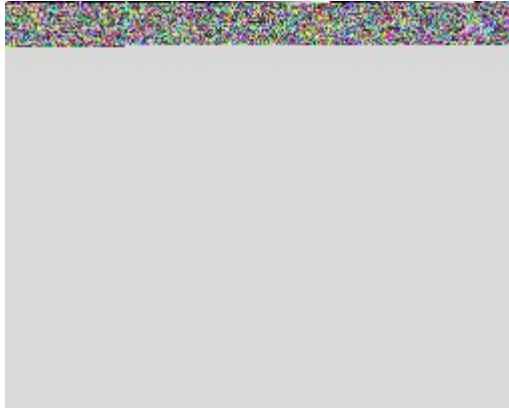

# HR-MS spectrum of C33'

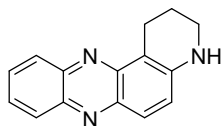

14 #15 RT: 0.17 AV: 1 NL: 6.17E8  
T: FTMS + c APCI corona Full ms [50.0000-750.0000]

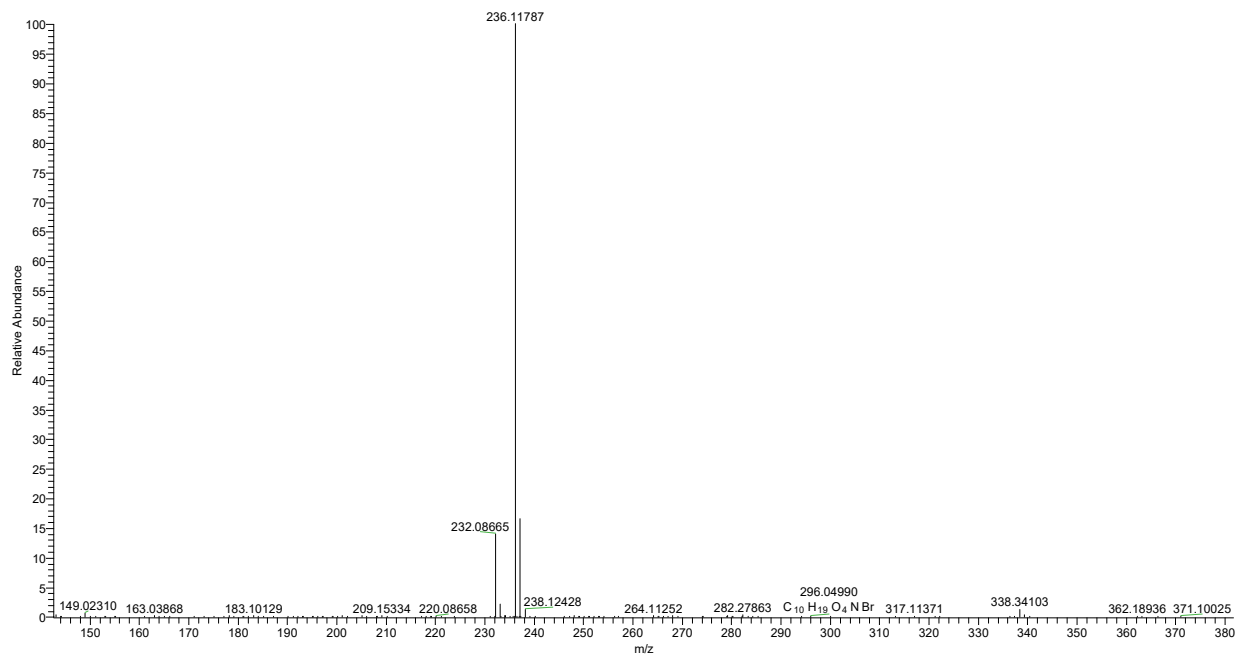

Chemical formula  C15H13N3

Peptide/Protein

Plus H2O  236.1182240 amu

Adduct

Identity H

Concentration One

Charge distribution

Most abundant : 1

HR-MS spectrum of C34

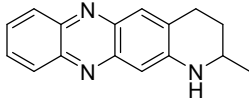

15 #15 RT: 0.17 AV: 1 NL: 9.61E6  
T: FTMS + cAPCI corona Full ms [50.0000-750.0000]

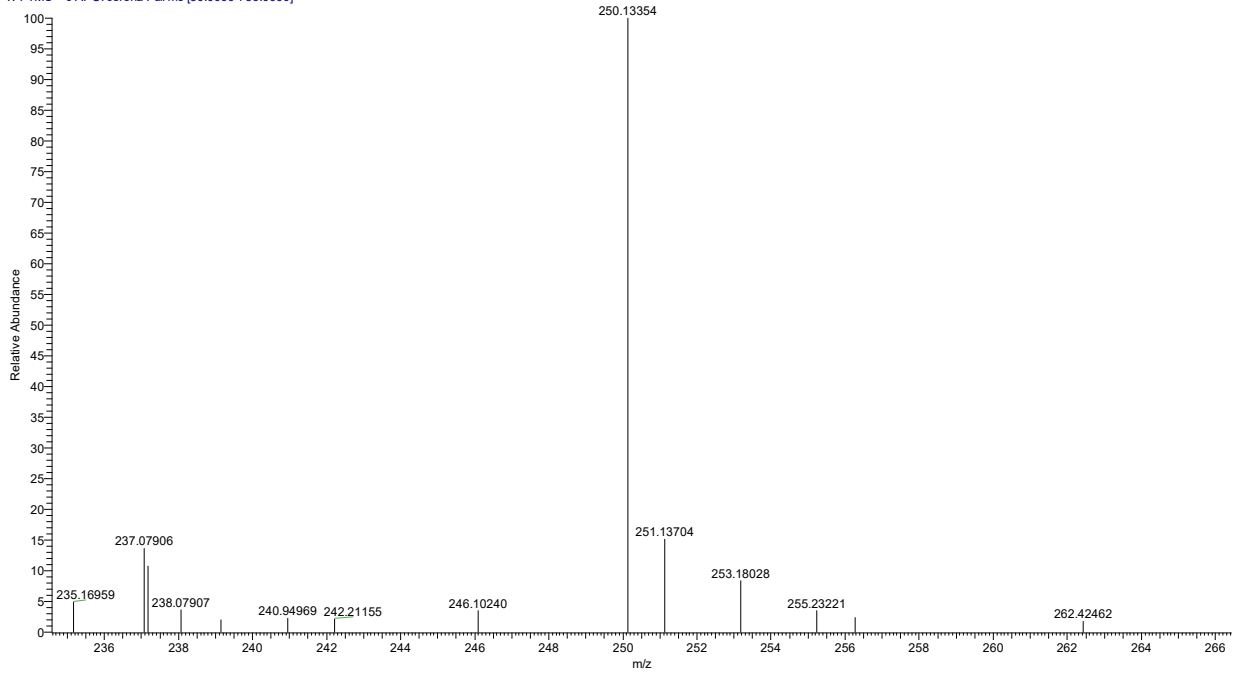

Chemical formula  C16H15N3

Peptide/Protein

Plus H2O  250.1338741 amu

Adduct

Identity H

Concentration One

Charge distribution

Most abundant : 1

# HR-MS spectrum of C34'

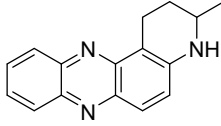

13\_20220902164952 #15 RT: 0.16 AV: 1 NL: 9.00E9  
T: FTMS + c APCI corona Full ms [50.0000-750.0000]

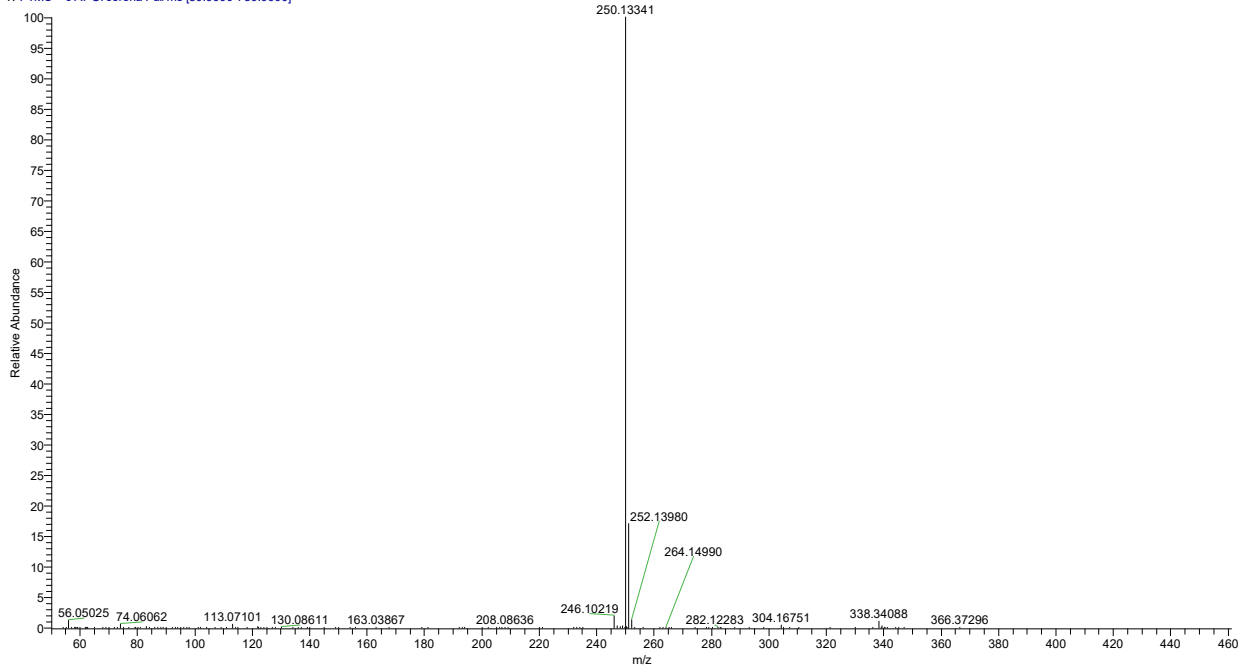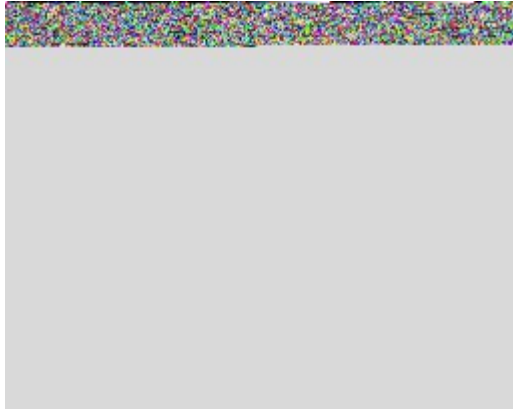

# HR-MS spectrum of C35

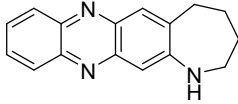

83 #15 RT: 0.17 AV: 1 NL: 3.42E8  
T: FTMS + c APCI corona Full ms [60.0000-900.0000]

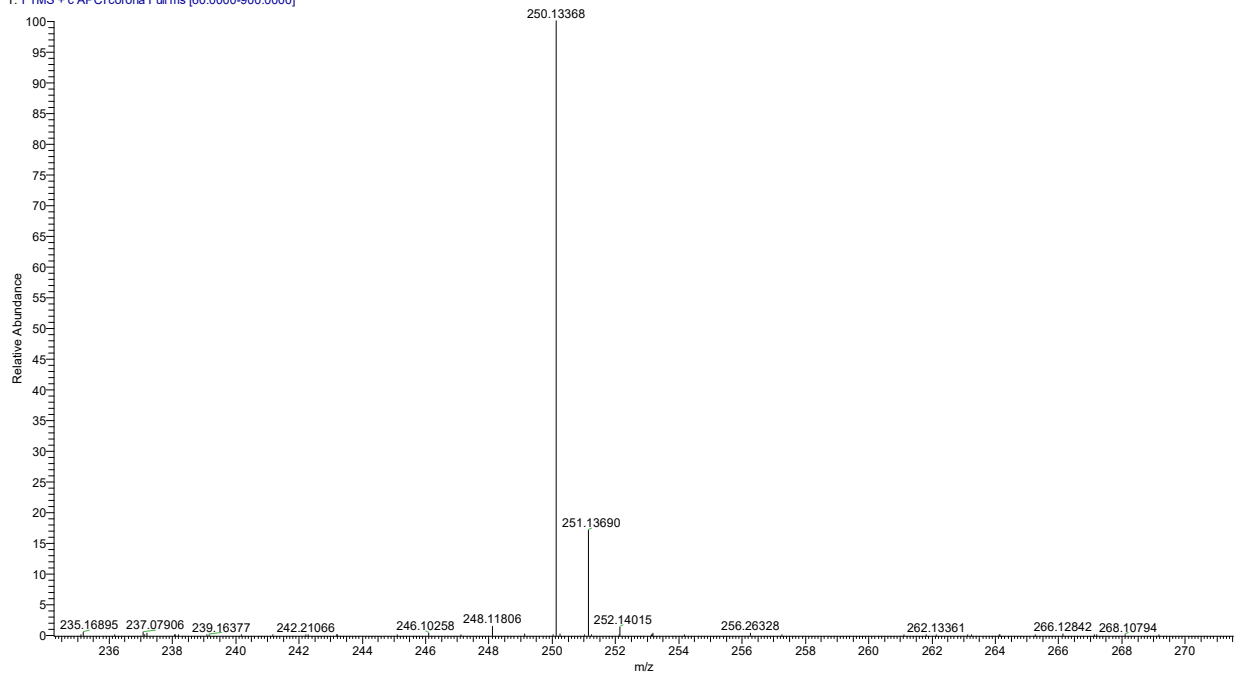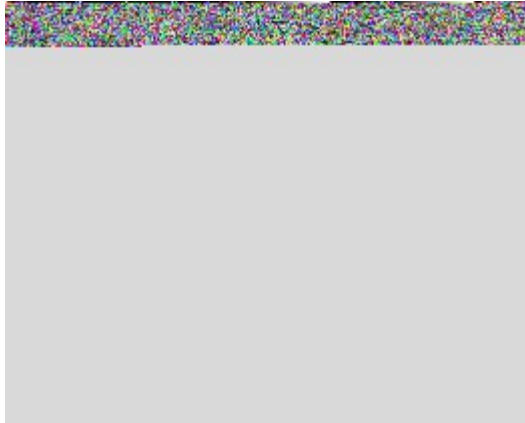

# HR-MS spectrum of C35'

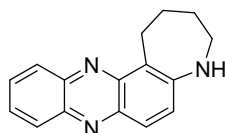

39 #15 RT: 0.17 AV: 1 NL: 7.58E8  
T: FTMS + c APCI corona Full ms [50.0000-750.0000]

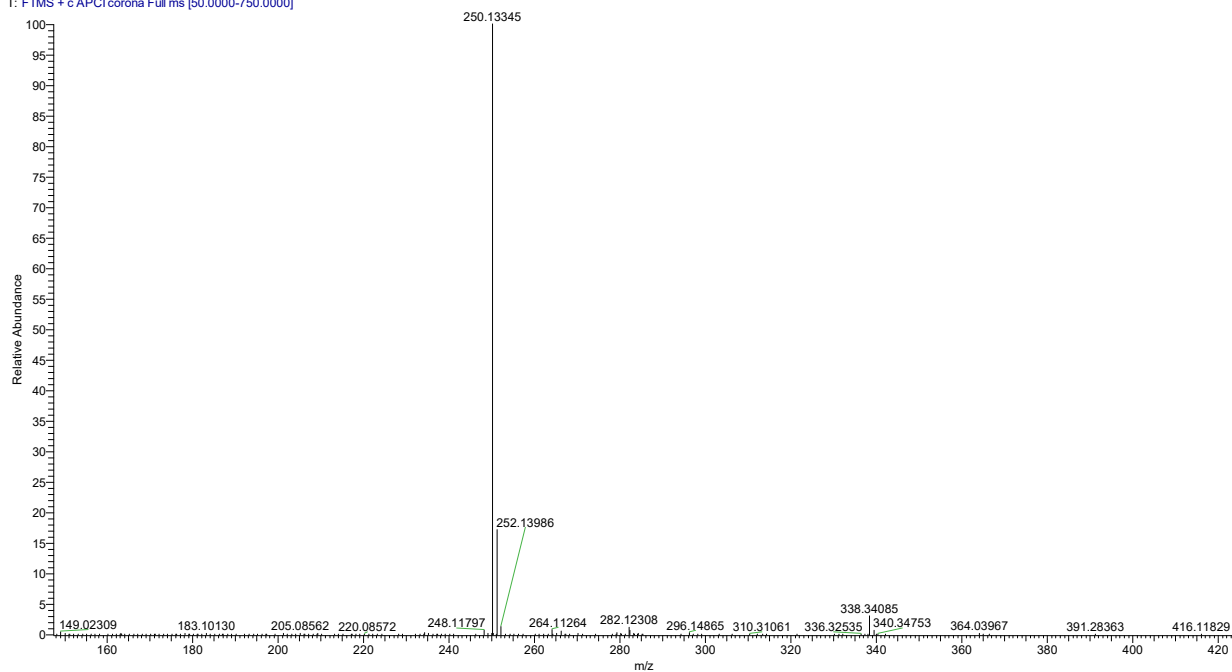

Chemical formula  C16H15N3

Peptide/Protein

Plus H2O  250.1338741 amu

Adduct

Identity H

Concentration One

Charge distribution

Most abundant : 1



# HR-MS spectrum of C36

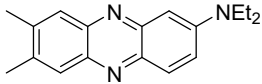

39 #15 RT: 0.17 AV: 1 NL: 1.52E8  
T: FTMS + cAPCI corona Full ms [50.0000-750.0000]

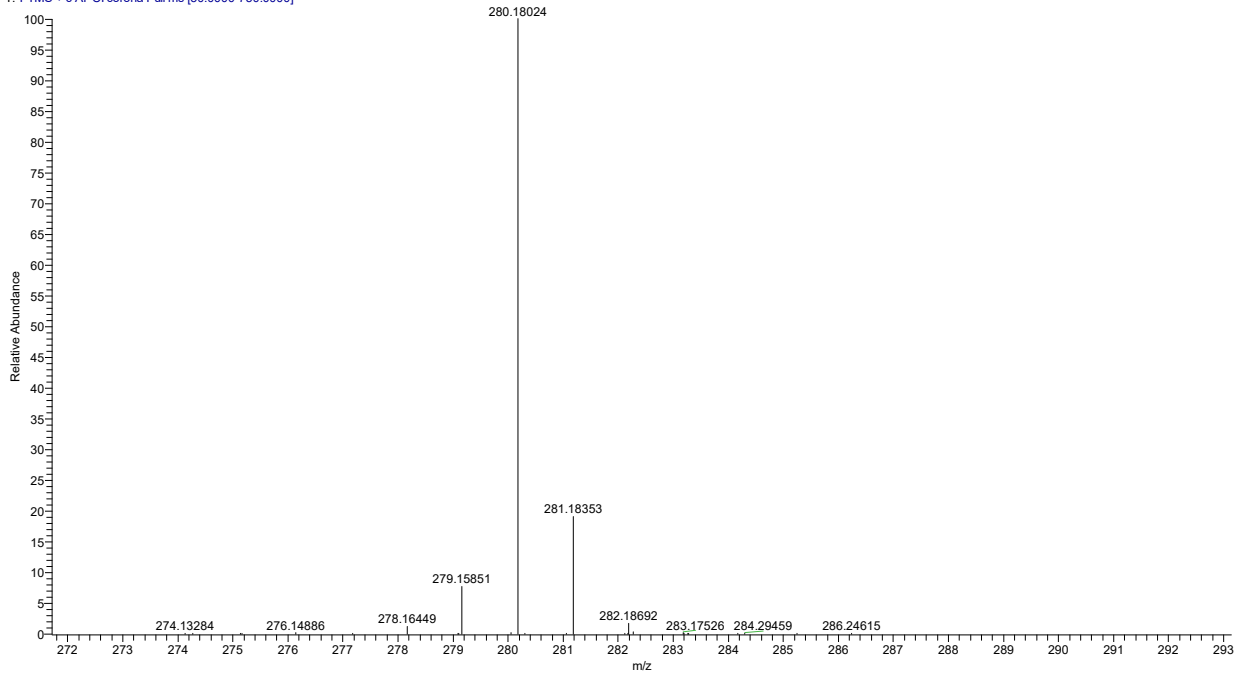

Chemical formula  C18H21N3

Peptide/Protein

Plus H2O  280.1808243 amu

Adduct

Identity H

Concentration One

Charge distribution

Most abundant : 1

# HR-MS spectrum of C37

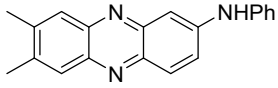

18 #15 RT: 0.17 AV: 1 NL: 8.76E8  
T: FTMS + cAPCI corona Full ms [50.0000-750.0000]

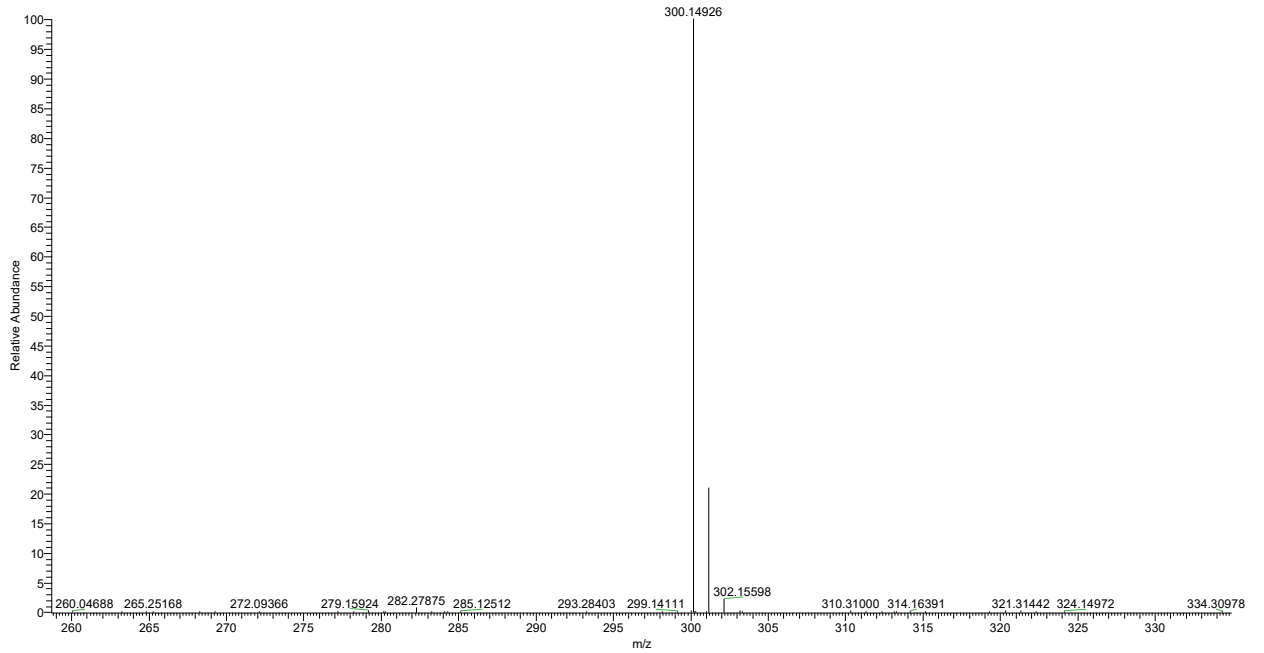

Chemical formula  C20H17N3

Peptide/Protein

Plus H2O  300.1495241 amu

Adduct

Identity H

Concentration One

Charge distribution

Most abundant : 1

# HR-MS spectrum of C38

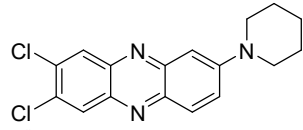

18 #15 RT: 0.16 AV: 1 NL: 5.55E7  
T: FTMS + c APCI corona Full ms [50.0000-750.0000]

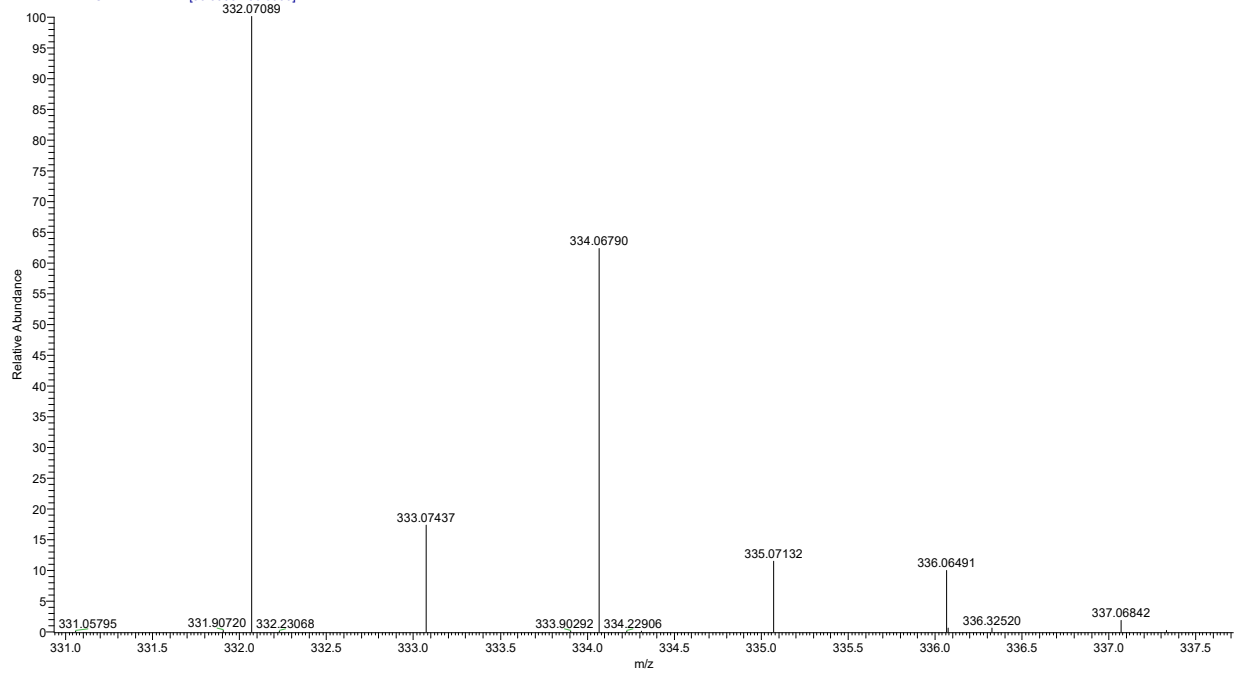

Chemical formula  C17H15Cl2N3

Peptide/Protein

Plus H2O  332.0715795 amu

Adduct

Identity H

Concentration One

Charge distribution

Most abundant : 1

# HR-MS spectrum of C39

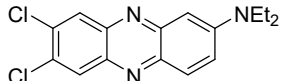

41 #15 RT: 0.17 AV: 1 NL: 3.28E7  
T: FTMS + cAPCI corona Full ms [50.0000-750.0000]

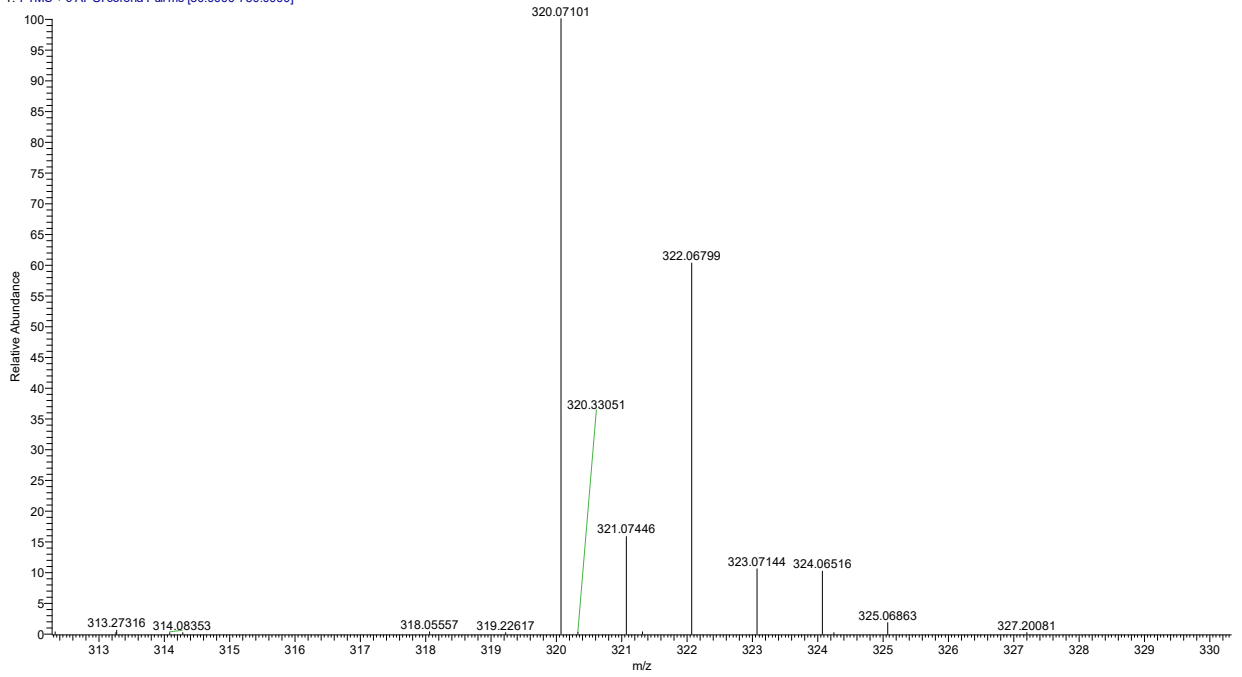

Chemical formula  C16H15Cl2N3

Peptide/Protein

Plus H2O  320.0715795 amu

Adduct

Identity H

Concentration One

Charge distribution

Most abundant : 1

# HR-MS spectrum of C40

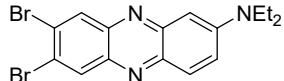

40 #15 RT: 0.17 AV: 1 NL: 1.46E7  
T: FTMS + cAPCI corona Full ms [50.0000-750.0000]

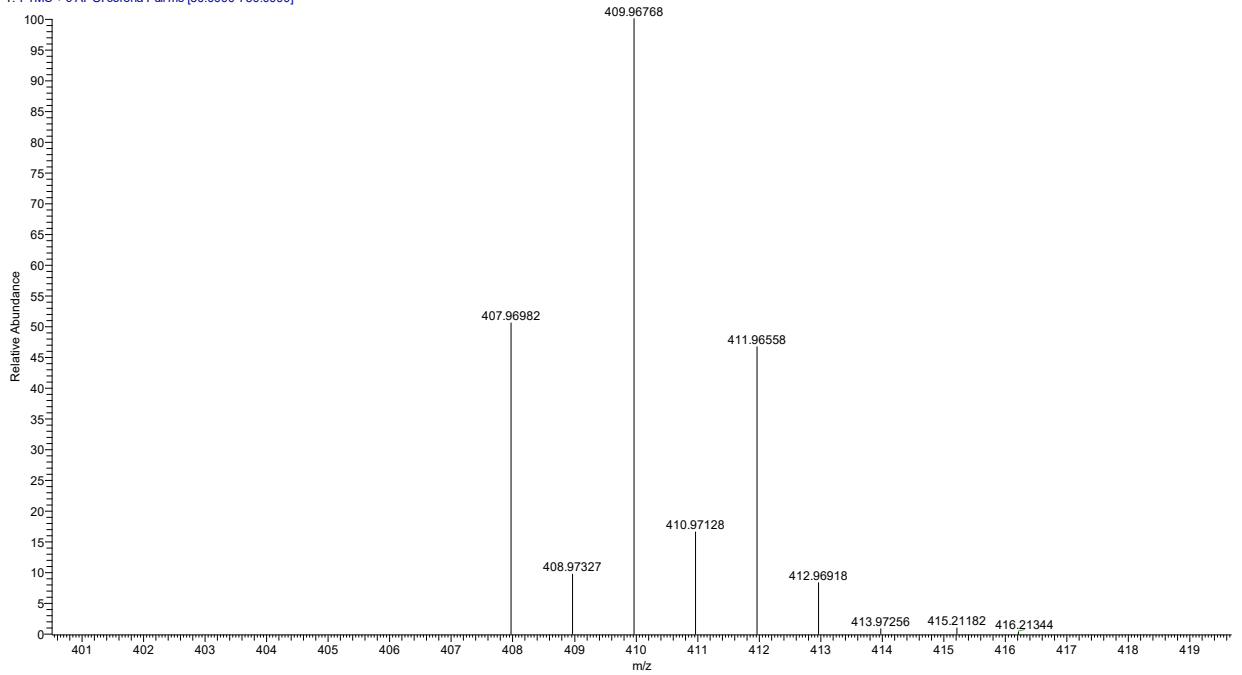

Chemical formula  C16H15Br2N3   
Peptide/Protein    
Plus H2O  407.9705493 amu   
 Adduct  
Identity H   
Concentration One   
Charge distribution  
Most abundant : 1

# HR-MS spectrum of C41

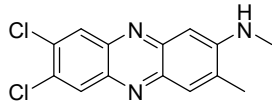

17 #15 RT: 0.16 AV: 1 NL: 7.45E7  
T: FTMS + c APCI corona Full ms [50.0000-750.0000]

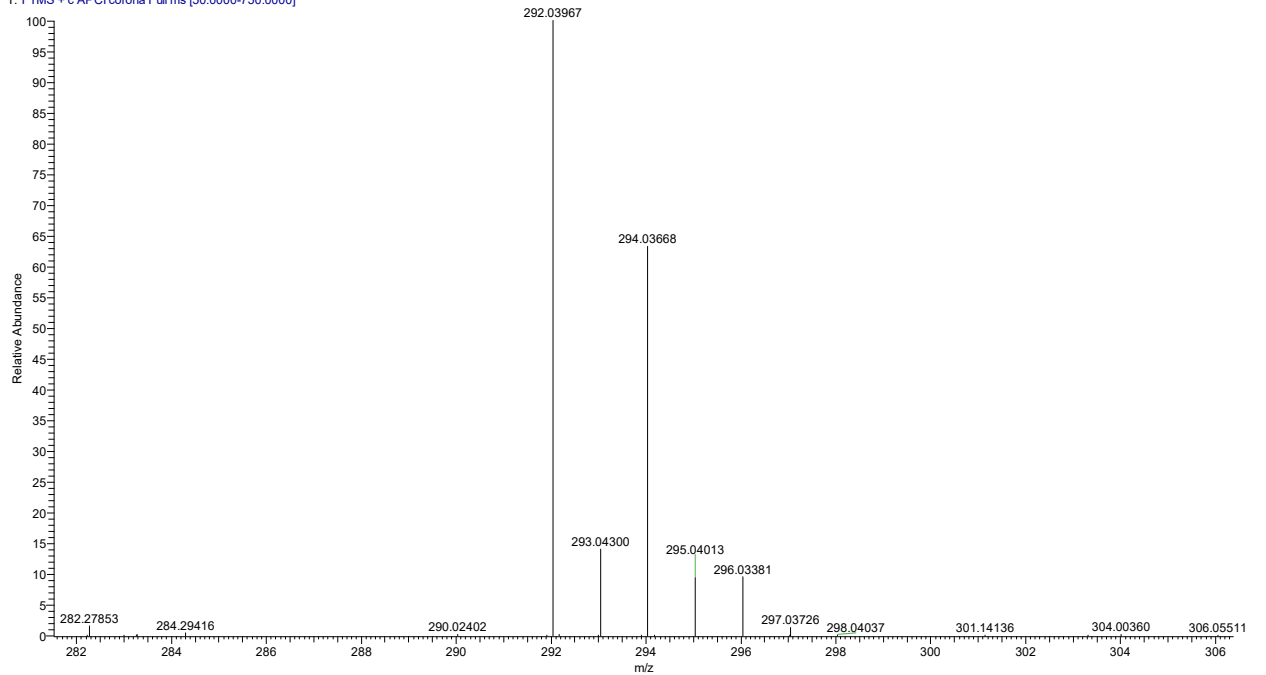

Chemical formula  C14H11Cl2N3

Peptide/Protein

Plus H2O  292.0402794 amu

Adduct

Identity H

Concentration One

Charge distribution

Most abundant : 1

HR-MS spectrum of C42

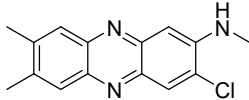

17 #15 RT: 0.17 AV: 1 NL: 4.34E8  
T: FTMS + c APCI corona Full ms [50.0000-750.0000]

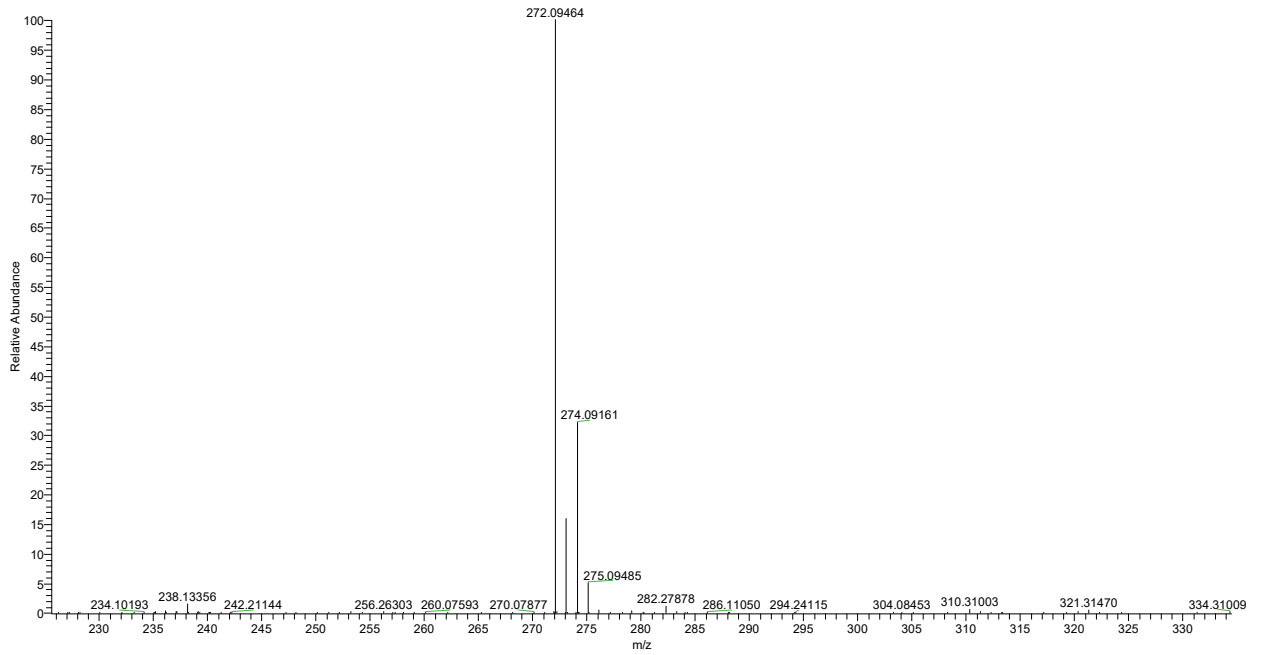

Chemical formula  C15H14ClN3

Peptide/Protein

Plus H2O  272.0949018 amu

Adduct

Identity H

Concentration One

Charge distribution

Most abundant : 1

# HR-MS spectrum of C43

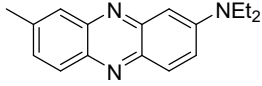

16 #15 RT: 0.17 AV: 1 NL: 6.39E7  
T: FTMS + c APCI corona Full ms [50.0000-750.0000]

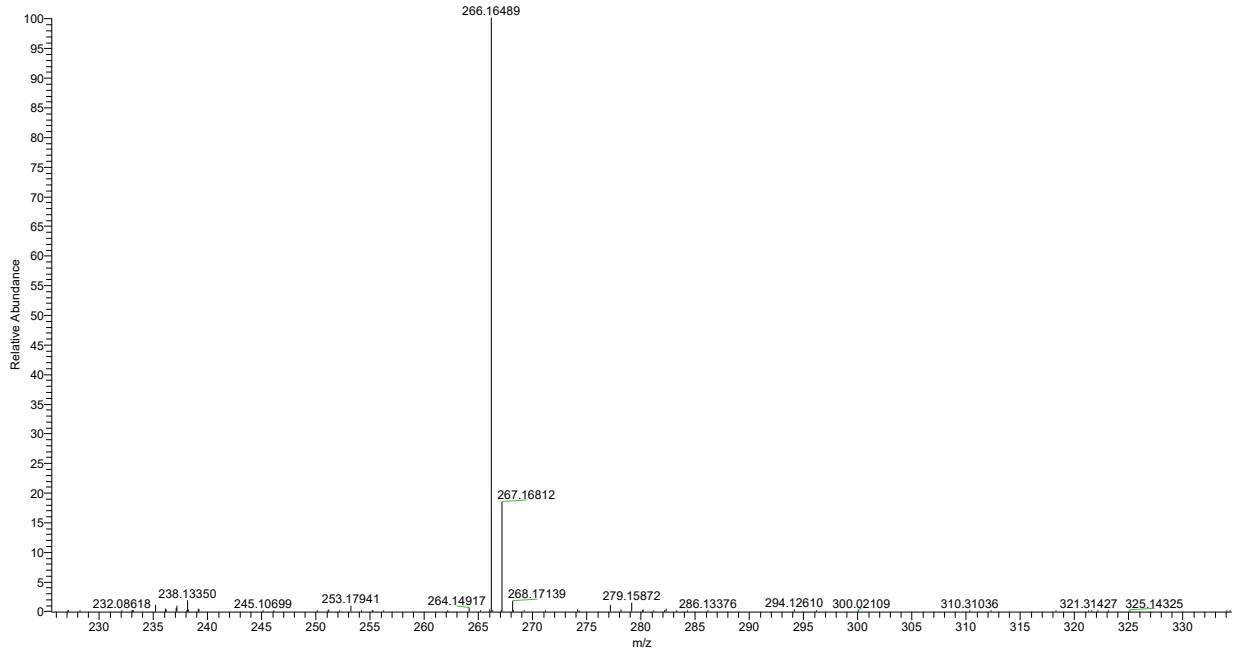

Chemical formula  C17H19N3

Peptide/Protein

Plus H2O  266.1651742 amu

Adduct

Identity H

Concentration One

Charge distribution

Most abundant : 1



# HR-MS spectrum of C44

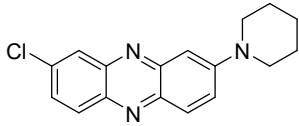

86 #15 RT: 0.17 AV: 1 NL: 6.53E7  
T: FTMS + c APCI corona Full ms [60.0000-900.0000]

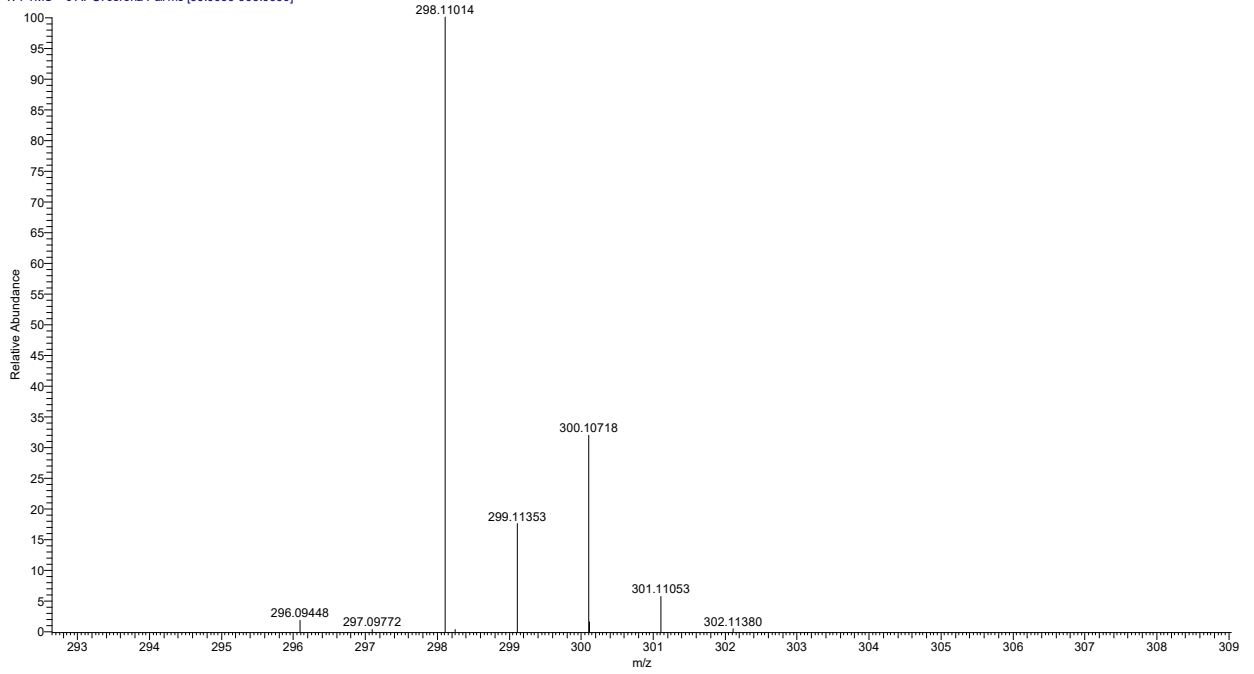

Chemical formula  C17H16ClN3

Peptide/Protein

Plus H2O  298.110518 amu

Adduct

Identity H

Concentration One

Charge distribution

Most abundant : 1

# HR-MS spectrum of C45

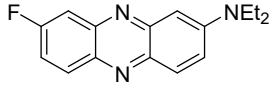

85 #15 RT: 0.17 AV: 1 NL: 5.96E9  
T: FTMS + c APCI corona Full ms [60.0000-900.0000]

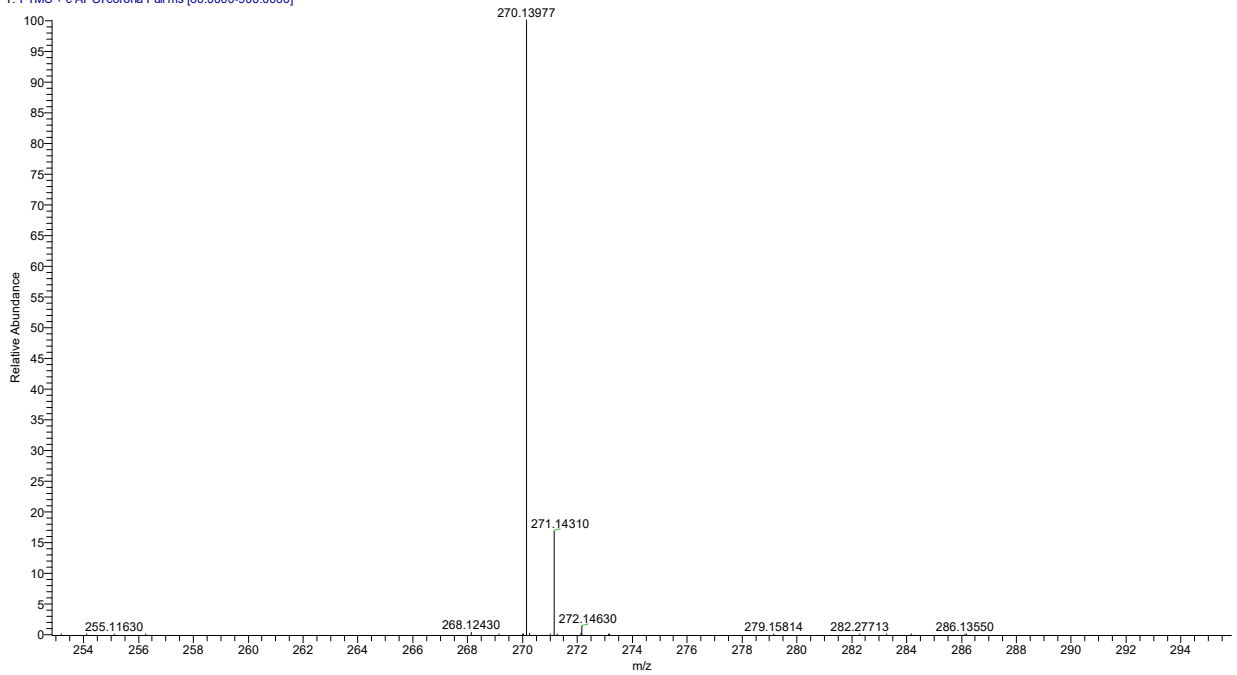

Chemical formula  C16H16FN3

Peptide/Protein

Plus H2O  270.1401023 amu

Adduct

Identity H

Concentration One

Charge distribution

Most abundant : 1

HR-MS spectrum of C46

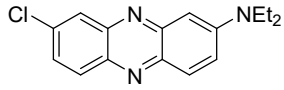

37 #19 RT: 0.21 AV: 1 NL: 6.97E7  
T: FTMS + c APCI corona Full ms [50.0000-750.0000]

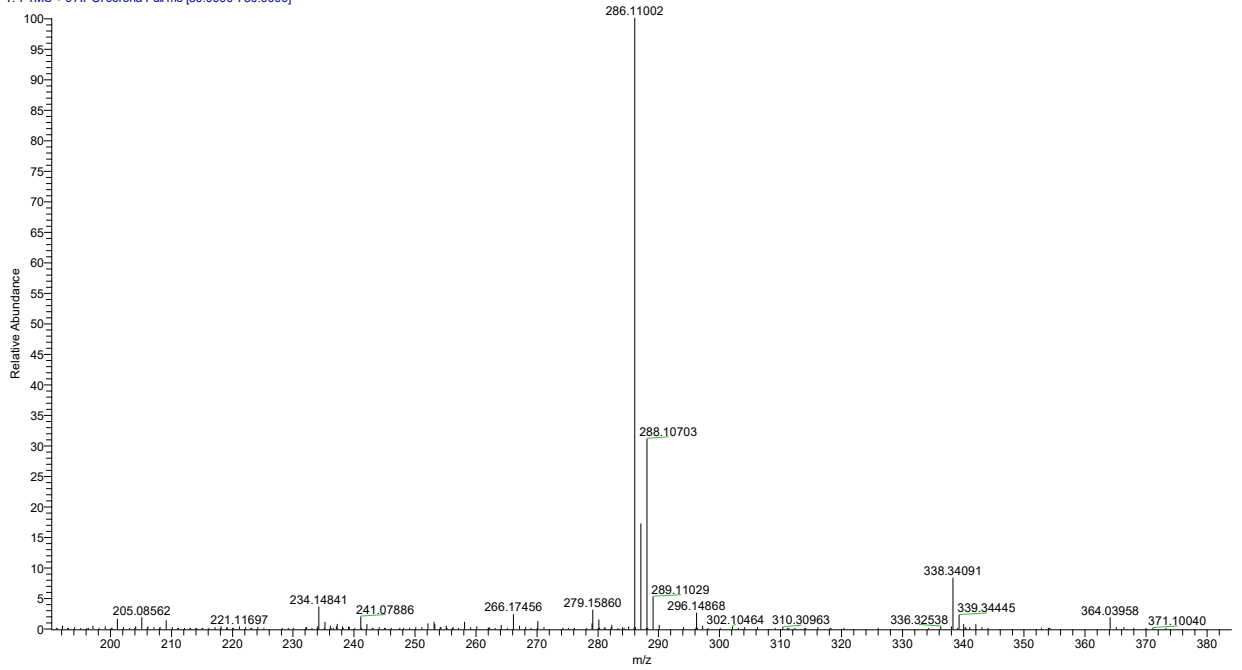

Chemical formula  C16H16ClN3

Peptide/Protein

Plus H2O  286.1105518 amu

Adduct

Identity H

Concentration One

Charge distribution

Most abundant : 1

# HR-MS spectrum of C47

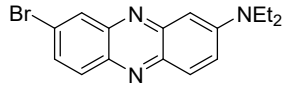

38 #15 RT: 0.17 AV: 1 NL: 4.57E7  
T: FTMS + c APCI corona Full ms [50.0000-750.0000]

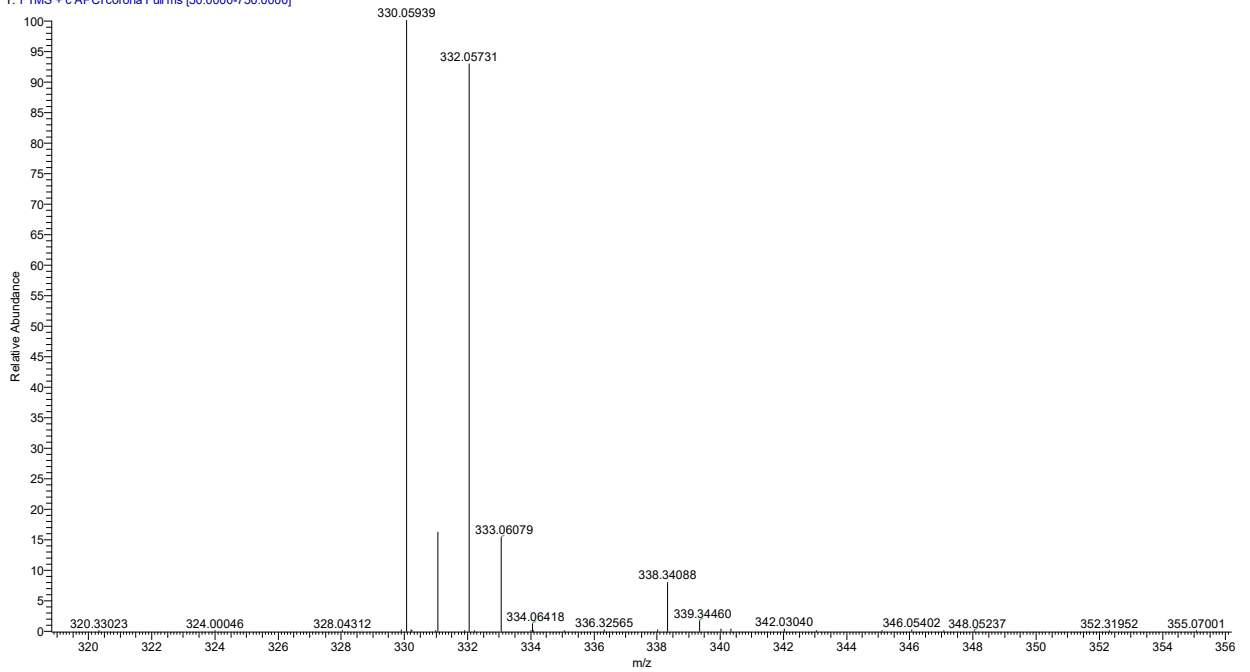

Chemical formula  C16H16BrN3

Peptide/Protein

Plus H2O  330.0600367 amu

Adduct

Identity H

Concentration One

Charge distribution

Most abundant : 1

# HR-MS spectrum of C48

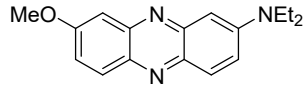

89 #15 RT: 0.17 AV: 1 NL: 7.10E7  
T: FTMS + c APCI corona Full ms [60.0000-900.0000]

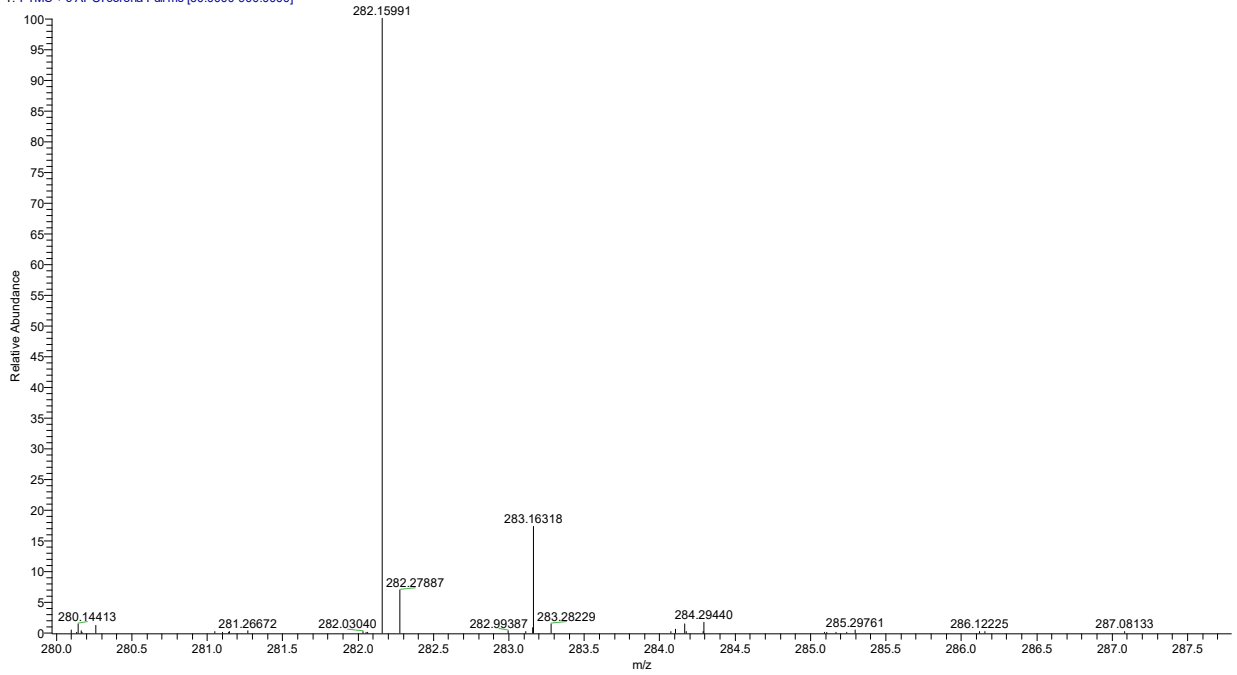

Chemical formula  C17H19N3O

Peptide/Protein

Plus H2O  282.1600888 amu

Adduct

Identity H

Concentration One

Charge distribution

Most abundant : 1

HR-MS spectrum of C49

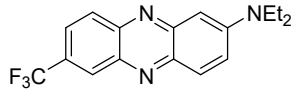

87 #15 RT: 0.16 AV: 1 NL: 1.17E9  
T: FTMS + c APCI corona Full ms [60.0000-900.0000]

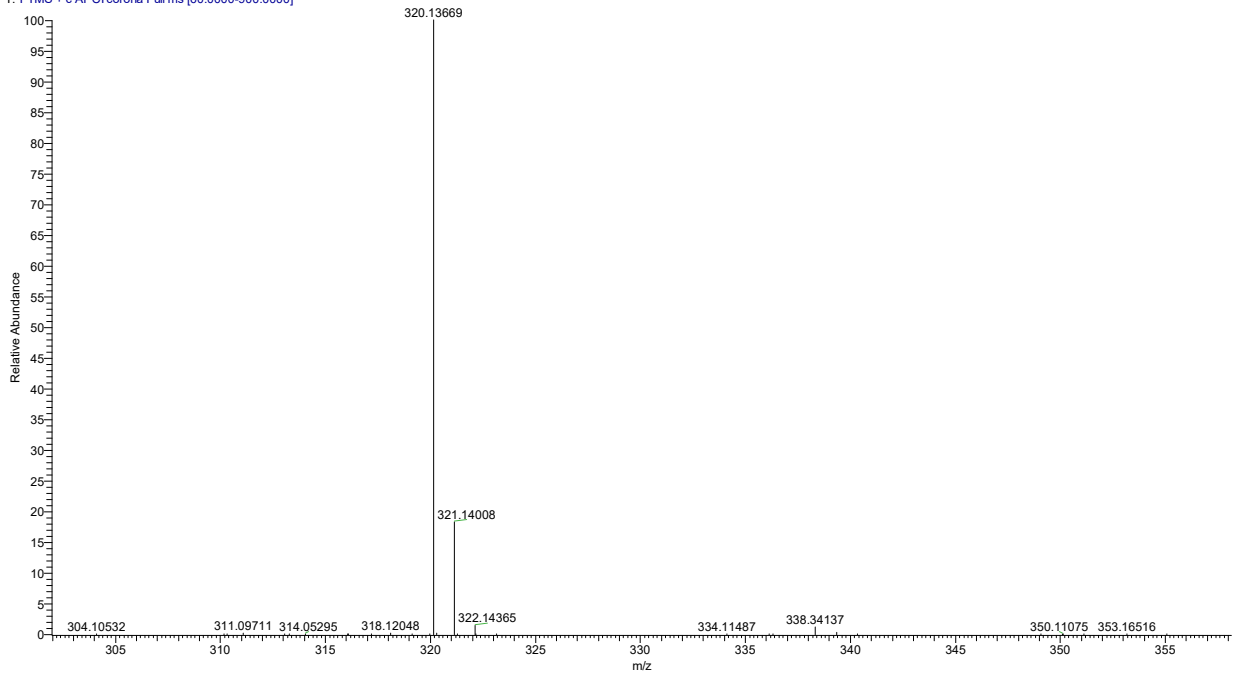

Chemical formula  C17H16F3N3

Peptide/Protein

Plus H2O  320.1369087 amu

Adduct

Identity H

Concentration One

Charge distribution

Most abundant : 1

# HR-MS spectrum of C49'

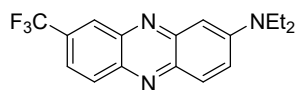

59\_20220902165338 #15 RT: 0.16 AV: 1 NL: 1.38E9  
T: FTMS + c APCI corona Full ms [50.0000-750.0000]

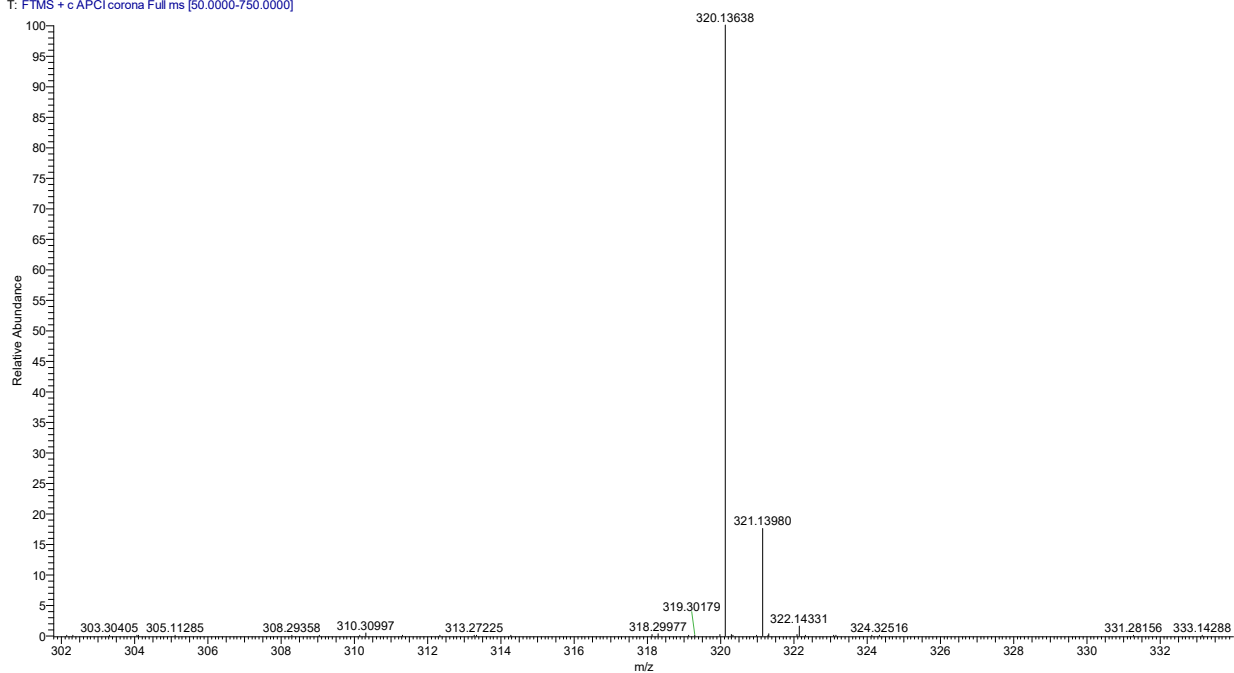

Chemical formula  C17H16F3N3

Peptide/Protein

Plus H2O  320.1369087 amu

Adduct

Identity H

Concentration One

Charge distribution

Most abundant : 1

# HR-MS spectrum of C50

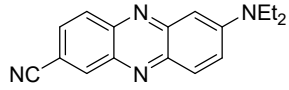

88 #15 RT: 0.16 AV: 1 NL: 1.17E9  
T: FTMS + c APCI corona Full ms [60.0000-900.0000]

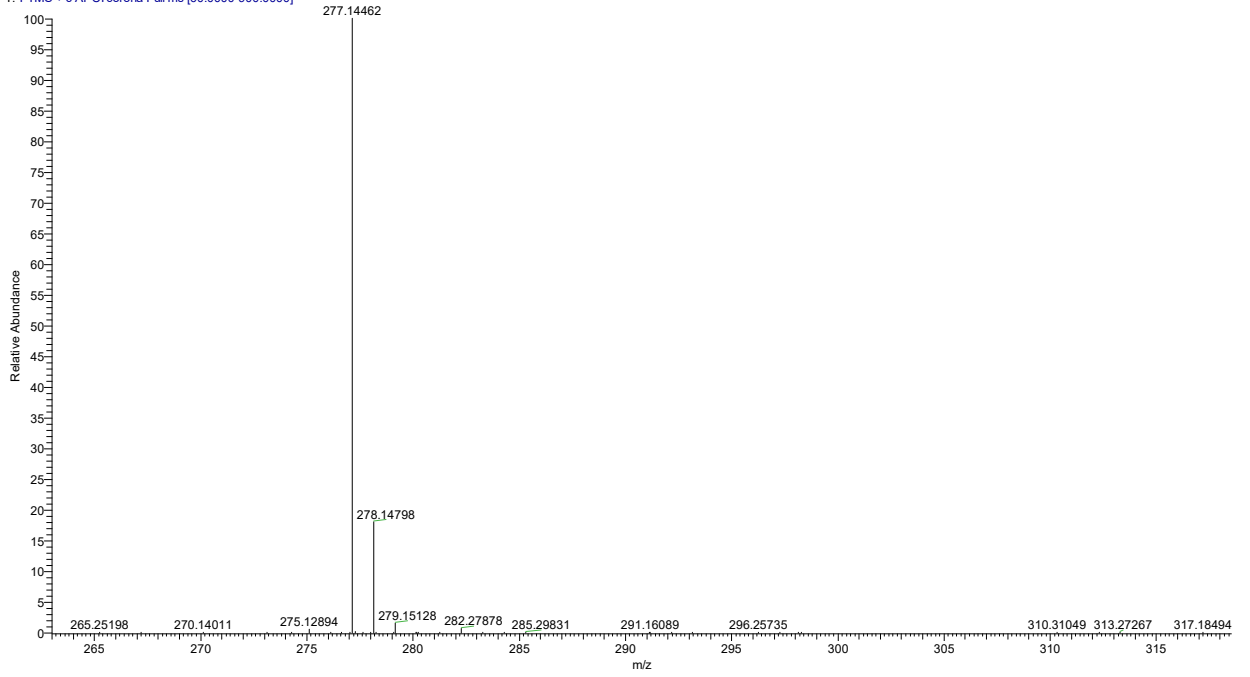

Chemical formula  C17H16N4

Peptide/Protein

Plus H2O  277.1447731 amu

Adduct

Identity H

Concentration One

Charge distribution

Most abundant : 1



# HR-MS spectrum of C50'

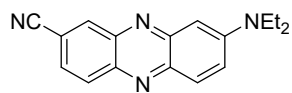

15 #15 RT: 0.17 AV: 1 NL: 6.76E8  
T: FTMS + c APCI corona Full ms [50.0000-750.0000]

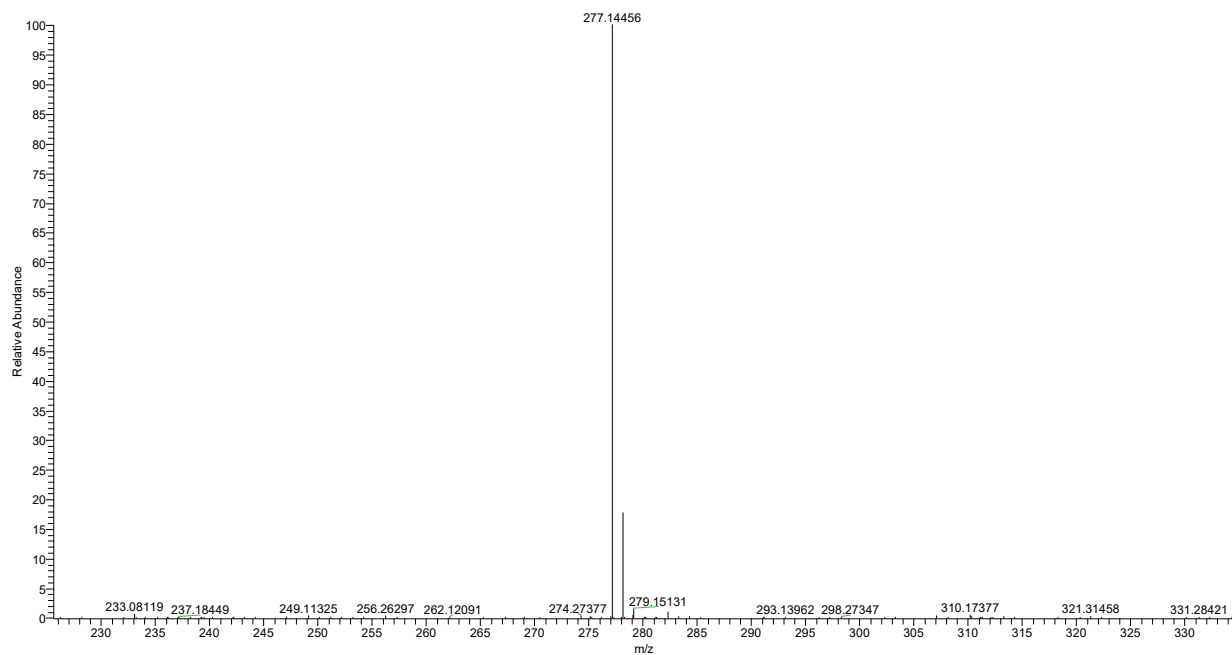

Chemical formula  C17H16N4

Peptide/Protein

Plus H2O  277.1447731 amu

Adduct

Identity H

Concentration One

Charge distribution

Most abundant : 1

# HR-MS spectrum of C51

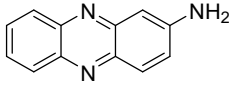

21 #15 RT: 0.17 AV: 1 NL: 7.81E8  
T: FTMS + c APC1 corona Full ms [50.0000-750.0000]

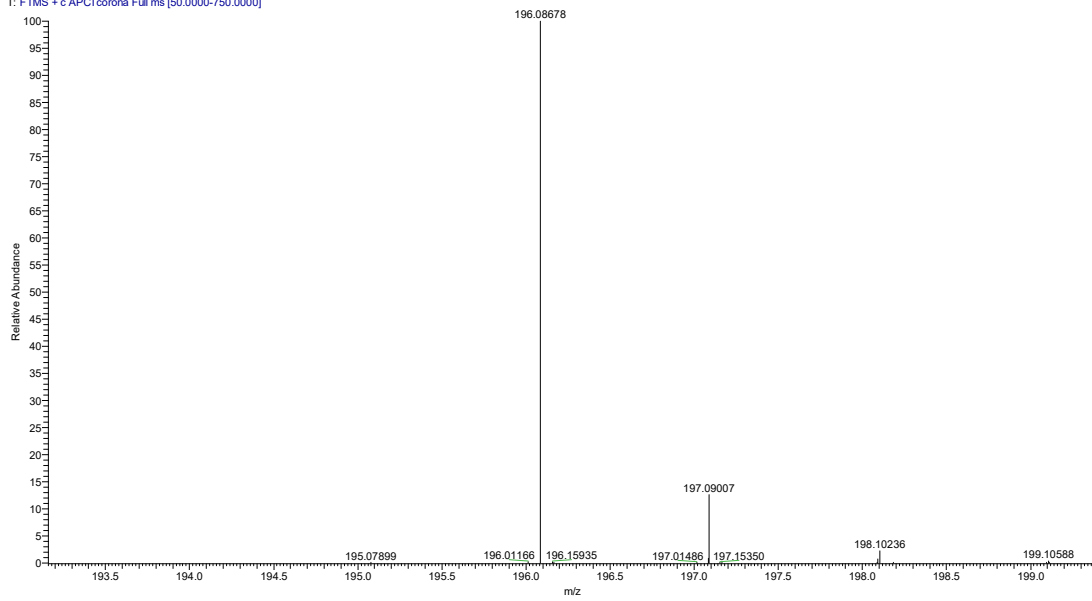

Chemical formula  C12H9N3

Peptide/Protein

Plus H2O  196.0869239 amu

Adduct

Identity H

Concentration One

Charge distribution

Most abundant : 1

# HR-MS spectrum of C52

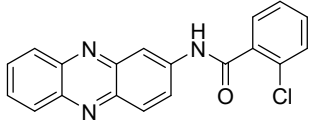

14 #15 RT: 0.16 AV: 1 NL: 8.47E7  
T: FTMS + c APCI corona Full ms [50.0000-750.0000]

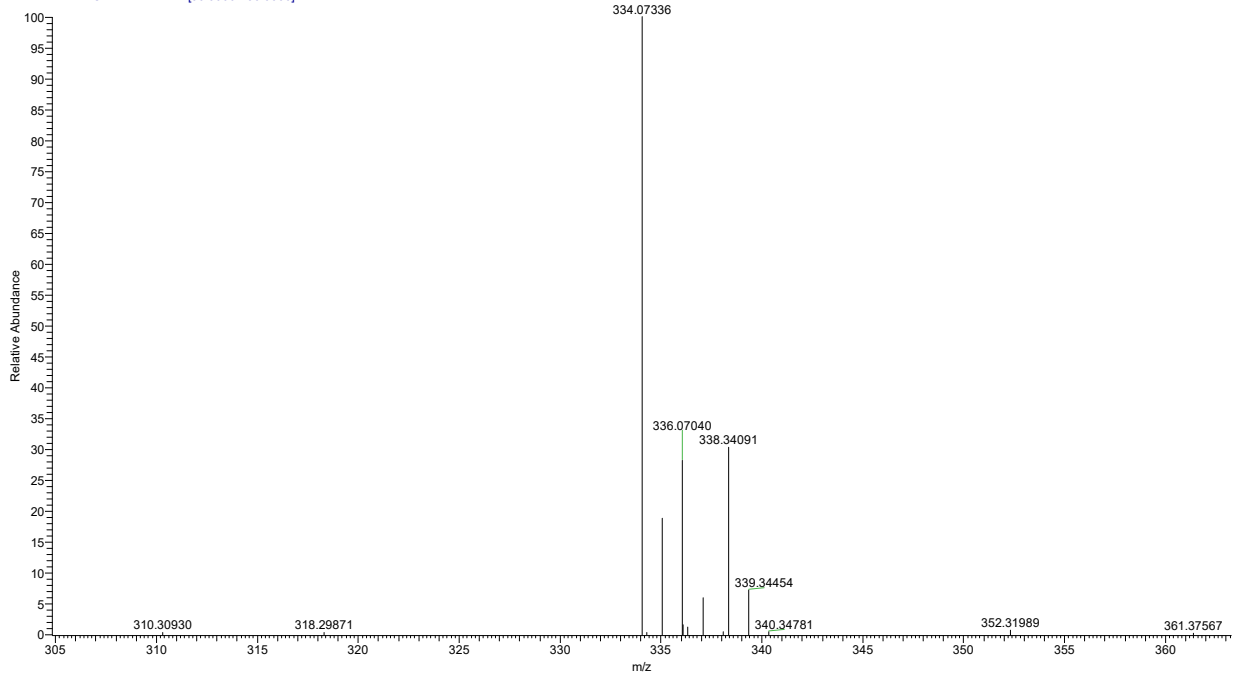

Chemical formula  C19H12ClN3O

Peptide/Protein

Plus H2O  334.0741663 amu

Adduct

Identity H

Concentration One

Charge distribution

Most abundant : 1

HR-MS spectrum of C53

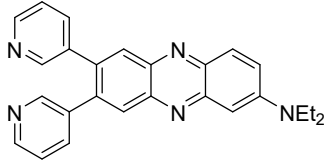

13 #19 RT: 0.22 AV: 1 NL: 4.42E5  
T: FTMS + c APCI corona Full ms [50.0000-750.0000]

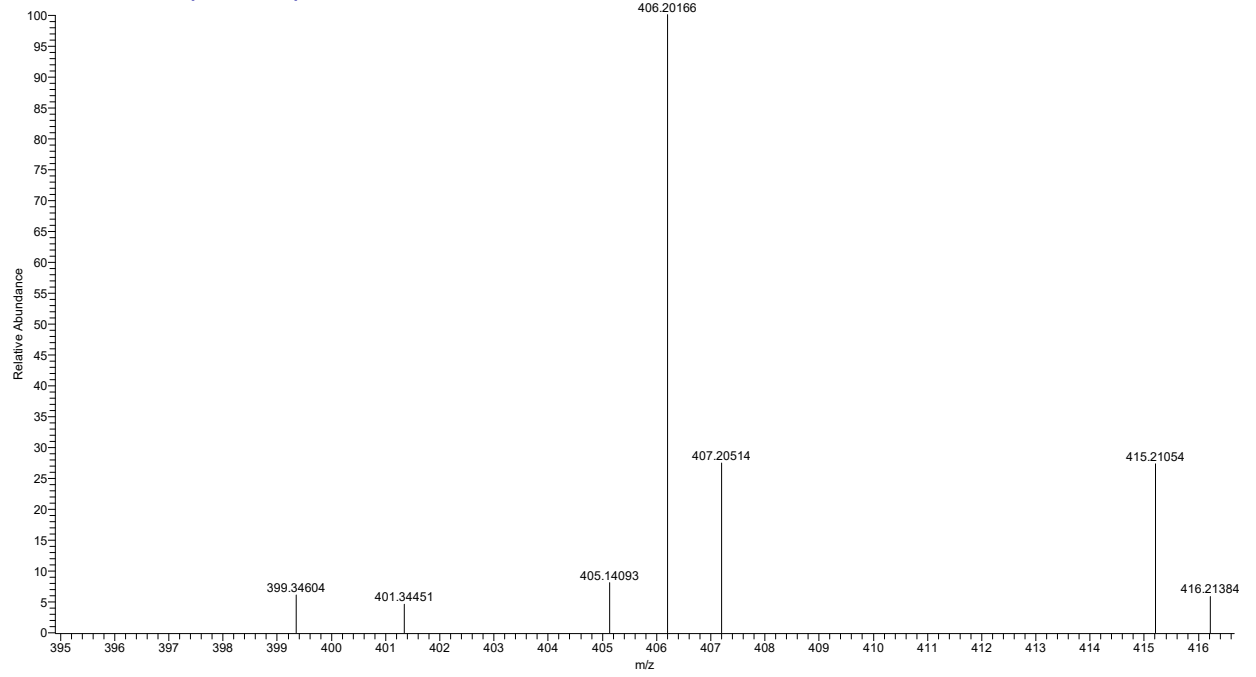

Chemical fomula  C26H23N5

Peptide/Protein

Plus H2O  406.2026223 amu

Adduct

Identity H

Concentration One

Charge distribution

Most abundant : 1

## 9. DFT calculation

All calculations were carried out using the Gaussian 16 C.01 program package<sup>1</sup>. The geometry optimizations were performed using hybrid B3LYP exchange correlation<sup>2-4</sup>, together with the Grimme D3BJ correction term to the electronic energy<sup>5,6</sup>. The 6-311G\*\* basis set<sup>7-9</sup> was used for all atoms. Vibrational frequency calculations were performed to characterize the nature of each stationary point and to make the zero-point energy (ZPE) corrections. A tight convergence (10-12 au) criterion was employed, and the solvent hexafluoropropanol (HFIP) ( $\epsilon = 5.10$ ) was considered using the SMD10 continuum solvent model (UFF radii).

## References

1. Frisch, M. J., et al. Gaussian 16; Gaussian, Inc., Wallingford, CT, 2016.
2. A. D. Becke, *Phys. Rev. A*, 1988, **38**, 3098–3100.
3. C. Lee, W. Yang and R. G. Parr, *Phys. Rev. B*, 1988, **37**, 785–789.
4. A. D. Becke, *J. Chem. Phys.*, 1993, **98**, 5648–5652.
5. S. Grimme, J. Anthony, S. Ehrlich and H. Krieg, *J. Chem. Phys.*, 2010, **132**, 154104.
6. S. Grimme, S. Ehrlich and L. Goerigk, *J. Comput. Chem.*, 2011, **32**, 1456–1465.
7. M. M. Francl, W. J. Pietro, W. J. Hehre, J. S. Binkley, M. S. Gordon, D. J. Defrees and J. A. Pople, *J. Chem. Phys.*, 1982, **77**, 3654–3665.
8. W. J. Hehre, R. Ditchfield, and J. A. Pople, *J. Chem. Phys.*, 1972, **56**, 2257–2261.
9. P. C. Hariharan and J. A. Pople, *Theor. Chim. Acta.*, 1973, **28**, 213–222.
10. A. V. Marenich, C. J. Cramer and D. G. Truhlar, *J. Phys. Chem. B*, 2009, **113**, 6378–6396.

**Table S2.** Calculated energies, Mulliken analysis, and WFRT analysis <sup>a</sup>

|                            | <b>C1-2'</b> | <b>C1-2</b> |
|----------------------------|--------------|-------------|
| w% <sup>b</sup>            | 3.99%        | 14.50%      |
| $\Delta E/\text{kcal/mol}$ | 0.00         | -34.74      |

a. ref [Y. Wang, *J. Comput. Chem.* 2021, **42**, 412-417; Y. Wang, *Phys. Chem. Chem. Phys.*, 2021, **23**, 2331-2348]

b. projection-weighted symmetric orthogonalization (PWSO)%

The calculation for the weights of resonance forms was performed by wave-function-based resonance theory (WFRT) with PWSO approach, the results show that **C1-2** is more stable than **C1-2'** ( $\Delta E = -34.74$  kcal/mol), and **C1-2** has a significantly higher distribution ratio (14.50%) than that of **C1-2'** (3.99%).

**Table S3. Cartesian coordination and absolute energy for C1-2 and C1-2'.****E +ZPE = -786.7293113 a.u**

|   |             |             |             |
|---|-------------|-------------|-------------|
| C | -3.99999900 | -0.99375400 | 0.84595200  |
| C | -2.99681300 | -0.55093700 | -0.02165000 |
| C | -3.17258300 | 0.62047100  | -0.79098600 |
| C | -4.35758900 | 1.35033500  | -0.60083000 |
| C | -5.33504300 | 0.91494100  | 0.27837100  |
| C | -5.16919500 | -0.26855600 | 1.00242200  |
| H | -3.83637500 | -1.90540200 | 1.40955600  |
| H | -4.50687100 | 2.25912900  | -1.17361300 |
| H | -6.24255600 | 1.49573400  | 0.39254200  |
| H | -5.93670300 | -0.61159500 | 1.68397300  |
| N | -1.82880000 | -1.34866200 | -0.17030200 |
| H | -1.98546800 | -2.33582800 | -0.33593500 |
| C | -0.53877200 | -0.98049800 | 0.03583600  |
| C | 0.49897000  | -1.91393100 | -0.22736200 |
| C | -0.18048200 | 0.31004300  | 0.50260000  |
| C | 1.81217400  | -1.57797600 | -0.05742300 |
| H | 0.24109900  | -2.90846400 | -0.57457400 |
| C | 1.13331500  | 0.64450800  | 0.68195900  |
| H | -0.95422900 | 1.03065000  | 0.72189800  |
| C | 2.18894100  | -0.27816200 | 0.40376100  |
| H | 2.56694400  | -2.31750800 | -0.27569300 |
| H | 1.36324400  | 1.63840100  | 1.03474600  |
| N | -2.19646900 | 1.06484900  | -1.66747600 |
| H | -1.61424600 | 0.35449200  | -2.08785100 |
| H | -2.50445600 | 1.75199100  | -2.34036400 |
| N | 3.48858400  | 0.06217600  | 0.57349200  |
| C | 4.58116600  | -0.82807300 | 0.14254100  |
| H | 5.48113400  | -0.48511900 | 0.65015700  |
| H | 4.38326400  | -1.83623100 | 0.51084900  |
| C | 4.79956700  | -0.82803200 | -1.37025900 |
| H | 3.91510000  | -1.16838700 | -1.91167600 |
| H | 5.05536400  | 0.16918400  | -1.73154100 |
| H | 5.62564500  | -1.49981600 | -1.61638700 |
| C | 3.87706100  | 1.38044300  | 1.10287200  |
| H | 4.84078000  | 1.24976500  | 1.59472200  |
| H | 3.16867900  | 1.66243700  | 1.88132400  |
| C | 3.97381700  | 2.46206700  | 0.02743500  |
| H | 4.75992000  | 2.23505000  | -0.69484800 |
| H | 3.03298600  | 2.57644100  | -0.51455100 |
| H | 4.21633800  | 3.41919500  | 0.49584400  |
